# Supplementary material for: Integrated bulk RNA and single-cell RNA sequencing to identify and validate exercise-related genes for predicting the prognosis of invasive ductal carcinoma
Source: Research Square preprint supplement (doi:10.21203/rs.3.rs-8444169/v1), 2026-01-16

# Integrated bulk RNA and single-cell RNA sequencing to identify and validate exercise-related genes for predicting the prognosis of invasive ductal carcinoma

## Screening and identification of the prognostic genes

### Identification of DE-ERGs

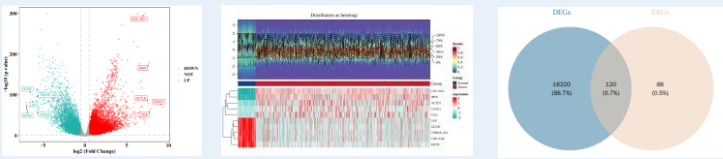

### Functional analysis of DE-ERGs

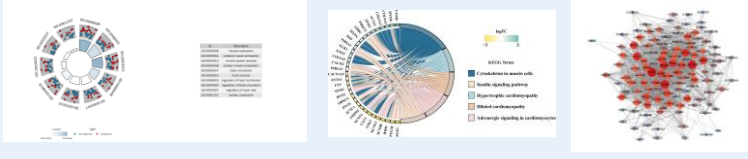

### Selection of prognostic genes

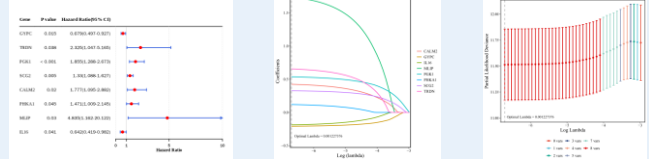

## Construction of the prognostic model and analysis of the risk groups and prognostic genes

### Construction of the prognostic model

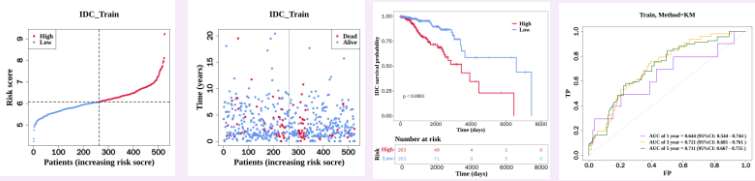

### Analysis of the risk groups and prognostic genes

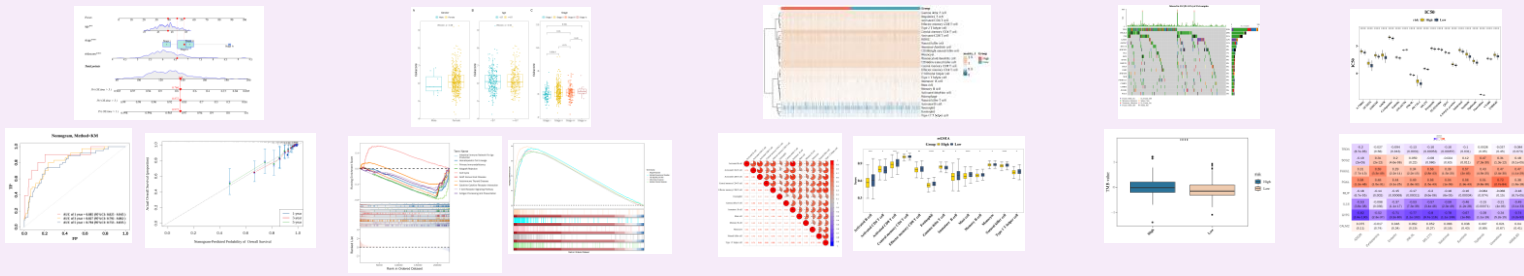

## Single-cell RNA sequencing analysis and RT-qPCR

### Single-cell RNA sequencing analysis

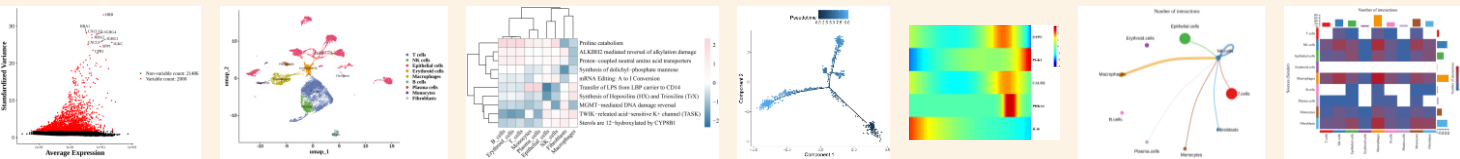

### RT-qPCR

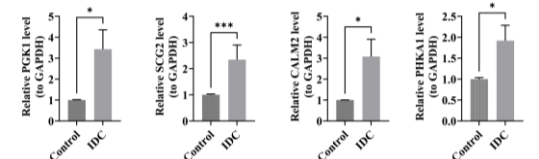

Supplement: Supplementary file 1 [file 00ba47ab923e23c429700d0f.pdf]
