# Supplementary material for: Integrated bulk RNA and single-cell RNA sequencing to identify and validate exercise-related genes for predicting the prognosis of invasive ductal carcinoma
Source: Research Square preprint supplement (doi:10.21203/rs.3.rs-8444169/v1), 2026-01-16
Supplement: Supplementary file 1 [file 0574429199bfa14fdb49161e.xlsx]

## Sheet: 01_KEGG
Gene set enrichment analysis (GSEA) for pancreatic ductal adenocarcinoma (IDC).
Description	enrichmentScore	NES	pvalue	p.adjust
KEGG_INTESTINAL_IMMUNE_NETWORK_FOR_IGA_PRODUCTION	45	-0.737621	-2.47336	2.40038620143751e-10
KEGG_HEMATOPOIETIC_CELL_LINEAGE	80	-0.621708	-2.36848	3.442758933956e-10
KEGG_PRIMARY_IMMUNODEFICIENCY	34	-0.786771	-2.47351	5.447338535172e-10
KEGG_ALLOGRAFT_REJECTION	35	-0.758106	-2.40562	2.24872158555521e-09
KEGG_CELL_CYCLE	125	0.584089229999869	2.28246221891925	2.05813756425463e-09
KEGG_GRAFT_VERSUS_HOST_DISEASE	37	-0.702947	-2.26677	4.72638734702112e-07
KEGG_AUTOIMMUNE_THYROID_DISEASE	36	-0.700518	-2.23569	4.64772902335704e-07
KEGG_CYTOKINE_CYTOKINE_RECEPTOR_INTERACTION	236	-0.400763	-1.77011	6.80263230832594e-07
KEGG_T_CELL_RECEPTOR_SIGNALING_PATHWAY	106	-0.50551	-2.00885	1.52388417903516e-06
KEGG_ANTIGEN_PROCESSING_AND_PRESENTATION	67	-0.564396	-2.07599	5.44941857686401e-06
KEGG_ASTHMA	26	-0.700912	-2.04133	1.87108400385056e-05
KEGG_RIBOSOME	86	-0.496961	-1.9124	2.73621379831117e-05
KEGG_VIRAL_MYOCARDITIS	68	-0.533549	-1.97491	3.06377418176896e-05
KEGG_B_CELL_RECEPTOR_SIGNALING_PATHWAY	73	-0.473811	-1.76244	0.000245950058435965
KEGG_DNA_REPLICATION	36	0.619590920110524	1.94334320921896	0.000410078045993559
KEGG_OOCYTE_MEIOSIS	108	0.447521207203275	1.73380448250703	0.000629317012202642
KEGG_TYPE_I_DIABETES_MELLITUS	39	-0.560321	-1.82481	0.000867724536275451
KEGG_CHEMOKINE_SIGNALING_PATHWAY	182	-0.365333	-1.57779	0.00112324289427738
KEGG_LEISHMANIA_INFECTION	70	-0.45586	-1.69413	0.00132469683530237
KEGG_CELL_ADHESION_MOLECULES_CAMS	129	-0.368852	-1.52743	0.00383068134154449
KEGG_NATURAL_KILLER_CELL_MEDIATED_CYTOTOXICITY	116	-0.371409	-1.50383	0.0055434932850321
KEGG_NEUROACTIVE_LIGAND_RECEPTOR_INTERACTION	226	0.336535996396552	1.42667	0.00583916263308615
KEGG_STARCH_AND_SUCROSE_METABOLISM	32	0.541464394683767	1.65348021702049	0.00921660226659597
KEGG_FRUCTOSE_AND_MANNOSE_METABOLISM	34	0.537105349884966	1.66020366540706	0.0130404003803661
KEGG_AMINOACYL_TRNA_BIOSYNTHESIS	41	0.508808992238661	1.64916667758737	0.0138031792341938
KEGG_RNA_DEGRADATION	53	0.475092017803198	1.60980123135353	0.0126928522264612
KEGG_GLYCOLYSIS_GLUCONEOGENESIS	56	0.464681538370456	1.58908148759258	0.0136820430890546
KEGG_ARACHIDONIC_ACID_METABOLISM	52	-0.43171	-1.50537	0.0141458672660898
KEGG_FC_EPSILON_RI_SIGNALING_PATHWAY	76	-0.382077	-1.44203	0.0122220404660447
KEGG_ONE_CARBON_POOL_BY_FOLATE	17	0.63054830042217	1.61616075330285	0.0152874074571775
KEGG_HOMOLOGOUS_RECOMBINATION	28	0.540996915939842	1.61052096864256	0.0148197311437317
KEGG_BLADDER_CANCER	42	0.490493226576869	1.59849090064568	0.0156200499146268
KEGG_PENTOSE_PHOSPHATE_PATHWAY	25	0.561526908773426	1.61462060885266	0.0167343863240416
KEGG_PROGESTERONE_MEDIATED_OOCYTE_MATURATION	82	0.413985887502454	1.51059056393582	0.0170204373035145
KEGG_MISMATCH_REPAIR	23	0.579065357843479	1.60639280893067	0.0190705787624861
KEGG_P53_SIGNALING_PATHWAY	68	0.421257543483365	1.49436257192528	0.020453056526502
KEGG_STEROID_BIOSYNTHESIS	17	0.594171419284205	1.52292303054096	0.030129199174181
KEGG_STEROID_HORMONE_BIOSYNTHESIS	39	0.464763313056846	1.49283802477118	0.0383802381648231
KEGG_VIBRIO_CHOLERAE_INFECTION	52	0.43195887593634	1.45661708463518	0.0386184637224904
KEGG_JAK_STAT_SIGNALING_PATHWAY	133	-0.320803	-1.33021	0.0417275773272672
KEGG_GLYCOSAMINOGLYCAN_BIOSYNTHESIS_HEPARAN_SULFATE	26	0.503170559987853	1.46710359470423	0.0490566037735849
KEGG_PORPHYRIN_AND_CHLOROPHYLL_METABOLISM	28	0.491197937495996	1.46227188137842	0.0490566037735849
KEGG_AMINO_SUGAR_AND_NUCLEOTIDE_SUGAR_METABOLISM	43	0.443188540351275	1.44483377218072	0.0481695568400771
KEGG_EPITHELIAL_CELL_SIGNALING_IN_HELICOBACTER_PYLORI_INFECTION	67	0.390547639248626	1.38332608433153	0.0495238095238095
KEGG_PATHWAYS_IN_CANCER	319	0.285381316212325	1.24404493120211	0.0455341506129597
