# Supplementary material for: Integrated bulk RNA and single-cell RNA sequencing to identify and validate exercise-related genes for predicting the prognosis of invasive ductal carcinoma
Source: Research Square preprint supplement (doi:10.21203/rs.3.rs-8444169/v1), 2026-01-16
Supplement: Supplementary file 2 [file 0d596512ac4ba515d46d36b4.xlsx]

## Sheet: Supplementary Table 9
Gene set enrichment analysis (GSEA) pathways for PGK1
ID	setSize	enrichmentScore	NES	pvalue	p.adjust	qvalue	rank	leading_edge	core_enrichment
HALLMARK_E2F_TARGETS	200	0.844756832304526	3.95305557105463	1e-10	3.125e-10	9.21052631578947e-11	3978	tags=72%, list=7%, signal=68%	KIF4A/PLK1/KPNA2/RRM2/AURKA/DEPDC1/DLGAP5/RACGAP1/MTHFD2/MYBL2/MAD2L1/MCM2/TFRC/CCNB2/MKI67/KIF2C/CDCA8/DIAPH3/CDKN3/CDC25A/PRDX4/TRIP13/MCM6/E2F8/MELK/CHEK1/DSCC1/BUB1B/CDC20/GINS1/HMMR/CCNE1/CTPS1/CDC25B/NUP205/ORC6/SMC1A/BIRC5/MCM4/HMGB3/CDK1/RAD51AP1/CSE1L/TCF19/GINS3/LMNB1/CKS1B/CENPE/AURKB/RAN/DONSON/NCAPD2/PTTG1/ESPL1/SPAG5/CDK4/UBE2T/ATAD2/PLK4/TOP2A/BRCA2/RFC3/PCNA/PRIM2/DEK/HMGA1/MMS22L…
HALLMARK_G2M_CHECKPOINT	200	0.809032052835558	3.78588078997681	1e-10	3.125e-10	9.21052631578947e-11	3482	tags=62%, list=6%, signal=59%	KIF4A/PLK1/CCNA2/KPNA2/AURKA/DKC1/RACGAP1/MYBL2/BUB1/TPX2/MAD2L1/HSPA8/MCM2/CCNB2/STIL/MKI67/KIF2C/EXO1/CDKN3/CDC25A/MCM6/CHEK1/CDC45/TTK/KIF23/CDC20/CENPA/HMMR/FBXO5/E2F2/CDC25B/RAD54L/ORC6/AMD1/CDC6/SLC7A5/SMC1A/BIRC5/KNL1/HIF1A/POLQ/E2F1/HMGB3/UBE2C/INCENP/CDK1/DBF4/LMNB1/CKS1B/RBL1/KIF11/CENPE/AURKB/KIF15/PTTG1/ESPL1/NDC80/CDK4/SMC2/PLK4/CENPF/NEK2/TOP2A/SLC7A1/BRCA2/PRIM2/CCNF/HMGA1/EZH2/H2A…
HALLMARK_MTORC1_SIGNALING	200	0.786327548638671	3.67963463324708	1e-10	3.125e-10	9.21052631578947e-11	5516	tags=66%, list=10%, signal=60%	PGK1/LDHA/GAPDH/TPI1/ENO1/HSPD1/PLK1/EIF2S2/GPI/P4HA1/ERO1A/RRM2/AURKA/MTHFD2/BUB1/MCM2/TFRC/STIP1/PDK1/CDC25A/CCT6A/TXNRD1/IDI1/SLC2A1/GMPS/NUP205/PNP/SLC7A5/MCM4/PNO1/PSMD14/SHMT2/ACTR3/ME1/PSAT1/SRD5A1/WARS1/ACTR2/EPRS1/LGMN/PRDX1/YKT6/CCNF/PFKL/IMMT/PITPNB/BCAT1/PLOD2/AK4/G6PD/ATP2A2/RAB1A/PGM1/PSMD12/HMGCS1/PSMG1/HPRT1/PSMC2/RPN1/PHGDH/CACYBP/DHCR7/PSPH/GBE1/FADS2/HK2/DHFR/SQLE/CYB5B/NAMPT/H…
HALLMARK_MYC_TARGETS_V1	199	0.757509325844575	3.53667965359043	1e-10	3.125e-10	9.21052631578947e-11	5731	tags=64%, list=10%, signal=58%	PGK1/PSMD7/CCT5/LDHA/HSPD1/EIF2S2/CCNA2/KPNA2/TCP1/CCT4/MAD2L1/MCM2/PRDX4/MCM6/CDC45/XPOT/CDC20/SF3B3/PSMD1/CTPS1/SRPK1/VBP1/YWHAQ/MCM4/HDAC2/PSMD14/PSMA7/AIMP2/CCT2/RAN/DDX21/EPRS1/CDK4/KARS1/IARS1/HSP90AB1/PCNA/PSMB2/DEK/EIF3B/H2AZ1/EIF2S1/MCM7/RFC4/USP1/CCT7/DDX18/XRCC6/RANBP1/CSTF2/HPRT1/ILF2/TYMS/SYNCRIP/NOLC1/UBA2/NOP56/VDAC1/ODC1/XPO1/PTGES3/TOMM70/SNRPG/CAD/SERBP1/CCT3/RRM1/NCBP1/TRA2B/SN…
HALLMARK_MYC_TARGETS_V2	57	0.775777546892899	3.11936876702767	1e-10	3.125e-10	9.21052631578947e-11	4721	tags=61%, list=8%, signal=56%	HSPD1/PLK1/MCM4/NIP7/AIMP2/CDK4/PLK4/DDX18/WDR43/BYSL/HK2/NOLC1/NOP56/DCTPP1/TBRG4/PES1/MCM5/NDUFAF4/LAS1L/TMEM97/UNG/TCOF1/SLC19A1/HSPE1/MPHOSPH10/UTP20/MRTO4/SUPV3L1/GNL3/SRM/PPRC1/CBX3/TFB2M/NOP16/PRMT3
HALLMARK_GLYCOLYSIS	199	0.647978900793995	3.02530109690586	1e-10	3.125e-10	9.21052631578947e-11	5609	tags=47%, list=10%, signal=43%	PGK1/PGAM1/LDHA/TPI1/ENO1/P4HA1/ERO1A/AURKA/DEPDC1/PKM/PFKP/SLC16A3/SLC25A13/CENPA/HMMR/KIF20A/P4HA2/CDK1/ME1/UGP2/PLOD2/AK4/G6PD/NSDHL/PRPS1/TGFBI/VEGFA/HK2/PMM2/RRAGD/NANP/ME2/STMN1/DLD/MDH1/MDH2/DDIT4/HOMER1/SAP30/ALDOA/VLDLR/HS2ST1/B4GALT4/PLOD1/TGFA/PGM2/RPE/SPAG4/EGLN3/GOT1/PPFIA4/COPB2/EXT1/SDC1/GYS1/KIF2A/HDLBP/B3GNT3/NT5E/HSPA5/LCT/DSC2/TALDO1/GALK2/IDH1/PPIA/RARS1/TXN/ZNF292/PSMC4/PKP2/…
HALLMARK_UNFOLDED_PROTEIN_RESPONSE	112	0.638533110175676	2.83205932696106	1e-10	3.125e-10	9.21052631578947e-11	7656	tags=53%, list=13%, signal=46%	TARS1/ERO1A/DKC1/MTHFD2/PDIA6/XPOT/SLC7A5/EIF4G1/CKS1B/PSAT1/HYOU1/CHAC1/IARS1/EIF2S1/YWHAZ/VEGFA/NOLC1/ATP6V0D1/NOP56/HSP90B1/EIF4EBP1/CEBPG/DDIT4/CALR/SRPRB/EDC4/PREB/PAIP1/SSR1/HSPA5/KIF5B/POP4/HSPA9/EIF4A3/PDIA5/HERPUD1/SRPRA/H2AX/ATF4/EIF4E/EIF2AK3/NOP14/CEBPB/EXOSC2/YIF1A/NABP1/ALDH18A1/EXOSC4/SDAD1/DDX10/NFYA/NPM1/LSM1/TUBB2A/DNAJC3/CNOT6/FKBP14/CCL2/LSM4
HALLMARK_MITOTIC_SPINDLE	199	0.59402200299173	2.77338569980449	1e-10	3.125e-10	9.21052631578947e-11	8371	tags=51%, list=15%, signal=44%	KIF4A/PLK1/AURKA/DLGAP5/RACGAP1/ANLN/BUB1/TPX2/CCNB2/KIF2C/ECT2/TTK/MAPRE1/KIF23/FBXO5/SMC1A/BIRC5/INCENP/CDK1/LMNB1/KIF11/CENPE/KIF15/ESPL1/NDC80/CENPF/NEK2/TOP2A/BRCA2/KIF1B/SMC4/LRPPRC/CKAP5/DYNC1H1/PIF1/KIF20B/STAU1/RANBP9/ABI1/NCK1/PRC1/MYO1E/SOS1/FLNA/TUBD1/KIF5B/KNTC1/KATNA1/SASS6/WASF1/TUBA4A/MARCKS/MID1/CEP72/BCR/CDC42EP1/STK38L/TUBGCP3/KATNB1/KIF22/MYH9/PCNT/CENPJ/OPHN1/ARHGDIA/SMC3/ACT…
HALLMARK_INTERFERON_GAMMA_RESPONSE	199	0.541226621944733	2.52689322297025	1e-10	3.125e-10	9.21052631578947e-11	8643	tags=45%, list=15%, signal=38%	MTHFD2/PFKP/PNP/HIF1A/CCL7/NUP93/WARS1/GCH1/PSMB2/PNPT1/TAP1/SOD2/NAMPT/RIPK2/CASP3/STAT1/CXCL10/UPP1/CXCL11/IDO1/RSAD2/USP18/ICAM1/TRIM25/EPSTI1/PSMA3/NCOA3/ITGB7/CMPK2/IFIH1/BATF2/NLRC5/RNF213/VCAM1/FCGR1A/LAP3/CD86/PLSCR1/MYD88/NMI/CD274/FPR1/CD38/B2M/LY6E/EIF2AK2/SAMHD1/METTL7B/PARP14/OAS3/GBP6/CXCL9/IFIT3/APOL6/MT2A/ZNFX1/PDE4B/SLAMF7/PSMB9/HELZ2/SECTM1/MX2/IFI44/OASL/HLA-B/IFI27/MX1/IFNAR2/…
HALLMARK_PI3K_AKT_MTOR_SIGNALING	105	0.553488966794074	2.42641120084622	1e-10	3.125e-10	9.21052631578947e-11	7738	tags=46%, list=14%, signal=40%	PDK1/SLC2A1/E2F1/ACTR3/CDK1/ACTR2/CDK4/HSP90B1/CALR/CLTC/CDK2/YWHAB/PTPN11/GSK3B/NCK1/MAPK1/GNGT1/TRIB3/AP2M1/CFL1/MYD88/PRKAR2A/RAF1/MAP2K3/RPS6KA3/CXCR4/EIF4E/EGFR/AKT1/MAPKAP1/PPP2R1B/ARHGDIA/ARF1/SFN/PPP1CA/UBE2N/DAPP1/CAB39/SQSTM1/PLCG1/PLCB1/MAP3K7/RALB/DDIT3/ACACA/SLA/PFN1/GRB2
HALLMARK_HYPOXIA	199	0.489522594040837	2.28549608466769	1e-10	3.125e-10	9.21052631578947e-11	5562	tags=35%, list=10%, signal=31%	PGK1/LDHA/GAPDH/TPI1/ENO1/GPI/P4HA1/ERO1A/NDRG1/PDK1/PFKP/SLC2A1/ADM/SLC2A5/P4HA2/UGP2/PLIN2/TMEM45A/PFKL/ALDOC/AK4/PGM1/PLAUR/TGFBI/JMJD6/VEGFA/GBE1/HK2/RRAGD/XPNPEP1/DDIT4/KDM3A/CP/SAP30/ALDOA/NFIL3/VLDLR/PGM2/PPFIA4/TES/EXT1/GYS1/HDLBP/HMOX1/HSPA5/ANXA2/SLC2A3/ZNF292/GCNT2/ANGPTL4/PFKFB3/CXCR4/ADORA2B/PKP1/EGFR/HOXB9/MYH9/CSRP2/LOX/PRKCA/IDS/MT2A/SLC25A1/HS3ST1/ENO2/S100A4/TPD52/IGFBP3/HK1
HALLMARK_INFLAMMATORY_RESPONSE	199	0.48859924124429	2.28118511061467	1e-10	3.125e-10	9.21052631578947e-11	7746	tags=42%, list=14%, signal=36%	AQP9/ADM/HIF1A/CCL7/CXCL8/SLC31A1/PVR/MARCO/SLC7A1/GCH1/ATP2A2/KIF1B/GNAI3/PLAUR/ATP2C1/NAMPT/RIPK2/OPRK1/CXCL10/ROS1/CCL20/CXCL11/ADRM1/LDLR/ABI1/IL1A/IL10/LYN/MSR1/ICAM1/C5AR1/HRH1/FZD5/CLEC5A/SGMS2/TNFRSF9/PROK2/TLR2/RAF1/NOD2/NMI/CYBB/ATP2B1/OSM/FPR1/SELENOS/LY6E/TNFSF9/TLR1/CD55/ADORA2B/EIF2AK2/TNFSF15/LAMP3/PTAFR/MEP1A/CXCL9/MET/ITGA5/C3AR1/IFNAR1/PDE4B/CD14/CCRL2/ABCA1/INHBA/P2RX7/CXCR6/MM…
HALLMARK_OXIDATIVE_PHOSPHORYLATION	200	0.484463873721224	2.26705785825241	1e-10	3.125e-10	9.21052631578947e-11	6051	tags=38%, list=11%, signal=34%	SLC25A5/HCCS/LDHA/GPI/PDHA1/ATP5F1B/TIMM17A/UQCRFS1/CYCS/ATP5F1C/IMMT/OPA1/DLAT/MRPL15/IDH2/LRPPRC/AFG3L2/COX7B/VDAC2/VDAC1/MRPS22/DLD/TOMM70/MDH1/MDH2/IDH3A/ACO2/ETFA/ATP5MC3/ALAS1/AIFM1/CYC1/UQCRH/NDUFS1/CS/HSPA9/TOMM22/POR/ATP5PB/NDUFAB1/ABCB7/IDH1/HSD17B10/COX7A2L/PDP1/NDUFB3/SUCLG1/PHYH/GRPEL1/FH/SDHB/COX5A/MRPL11/SDHC/MTRR/OGDH/SUPV3L1/NDUFB5/MRPS12/SLC25A3/IDH3G/DLST/COX7A2/OAT/VDAC3/LDHB/…
HALLMARK_ALLOGRAFT_REJECTION	200	0.483178889098658	2.26104474841216	1e-10	3.125e-10	9.21052631578947e-11	9134	tags=42%, list=16%, signal=36%	AARS1/HIF1A/CCL7/WARS1/BCAT1/IL2RA/CD80/TAP1/MTIF2/MRPL3/RIPK2/STAT1/CCR1/ABCE1/ELF4/MMP9/ABI1/IL10/NCK1/CCL13/LYN/UBE2D1/FLNA/ICAM1/TAP2/DARS1/RARS1/CD86/FCGR2B/ITGB2/TLR2/GZMB/CTSS/C2/B2M/TLR1/EIF3J/EGFR/AKT1/PRKCG/CXCL9/BRCA1/IFNG/CD47/IFNGR1/UBE2N/CCL4/TLR6/CSK/TPD52/TNF/GCNT1/INHBA/CDKN2A/IFNAR2/GALNT1/NCR1/HLA-A/PRF1/MAP3K7/HDAC9/NPM1/ACHE/FYB1/SRGN/IL15/IL12A/CCL2/IL1B/PTPRC/EIF3D/NME1/CCR…
HALLMARK_UV_RESPONSE_UP	158	0.482337820929476	2.2193758619292	1e-10	3.125e-10	9.21052631578947e-11	6242	tags=43%, list=11%, signal=38%	TARS1/TFRC/STIP1/CCNE1/AMD1/FEN1/AGO2/DDX21/CHRNA5/GCH1/YKT6/CTSV/RFC4/DNAJA1/GGH/PPAT/SLC6A8/RPN1/LHX2/TAP1/CYB5B/SOD2/GAL/CEBPG/CASP3/EPCAM/ALDOA/ALAS1/CDK2/CCK/BAK1/BTG3/LYN/HMOX1/PPIF/ICAM1/TCHH/TYRO3/POLE3/GLS/CDC5L/TUBA4A/HSPA13/E2F5/BID/GRPEL1/MARK2/H2AX/DNAJB1/NUP58/EIF2S3/MGAT1/TGFBRAP1/PARP2/EIF5/NPTX2/PSMC3/ENO2/AP2S1/PDAP1/SQSTM1/PRPF3/GRINA/CHKA/SLC6A12/ATP6V1C1/MMP14/NKX2-5
HALLMARK_ESTROGEN_RESPONSE_EARLY	200	-0.52703	-1.98182	1e-10	3.125e-10	9.21052631578947e-11	11073	tags=50%, list=19%, signal=40%	SNX24/MYOF/TPBG/RET/GAB2/ELF1/FARP1/RPS6KA2/RHOD/NRIP1/DHRS2/RASGRP1/KRT18/WFS1/SLC27A2/AR/PRSS23/GJA1/OLFML3/FCMR/DEPTOR/RBBP8/AFF1/CCN5/MREG/TMPRSS3/MUC1/TIPARP/HES1/CCND1/IL17RB/AREG/NADSYN1/ADCY9/CHPT1/ITPK1/FAM102A/PLAAT3/PEX11A/SCNN1A/CBFA2T3/MED13L/ARL3/ABCA3/ELOVL5/TJP3/AMFR/REEP1/RETREG1/XBP1/RAB17/ASB13/CXCL12/ADCY1/RARA/BHLHE40/MPPED2/CELSR2/TTC39A/CA12/SYBU/KCNK15/OVOL2/CELSR1/FOS/SLC…
HALLMARK_PROTEIN_SECRETION	96	0.553294214592988	2.39945551645723	5.92478399224583e-10	1.74258352713113e-09	5.1360356589128e-10	5674	tags=44%, list=10%, signal=39%	BNIP3/LAMP2/YKT6/KIF1B/IGF2R/STAM/VAMP7/ZW10/CLTC/ATP1A1/RAB9A/AP1G1/COPB2/MAPK1/CTSC/M6PR/OCRL/AP2M1/SCRN1/USO1/RAB22A/AP3S1/ANP32E/LMAN1/TMX1/RPS6KA3/SEC24D/GNAS/ARCN1/TMED2/EGFR/YIPF6/DNM1L/ARFGAP3/ARF1/STX7/SGMS1/AP2S1/SOD1/TPD52/ABCA1/GOLGA4
HALLMARK_COMPLEMENT	200	0.422205467304501	1.97571846812376	3.38930852998945e-09	9.41474591663737e-09	2.77487248069312e-09	6427	tags=34%, list=11%, signal=30%	LAMP2/CTSL/ME1/LGMN/S100A9/CTSV/ADAM9/PREP/MMP12/GNAI3/PLAUR/DYRK2/MT3/CTSB/CASP5/XPNPEP1/KYNU/CASP3/PHEX/PLA2G7/CP/CALM1/GNB4/CTSC/KIF2A/LYN/HSPA5/MMP8/FN1/PDP1/CXCL1/USP15/LAP3/CR1/PLSCR1/GCA/RAF1/GZMB/CTSS/SRC/C2/RABIF/CD55/MMP15/DGKG/C1QC/CEBPB/PIK3CA/PLEK/FCER1G/DPP4/RNF4/RCE1/ACTN2/CBLB/PSMB9/CDK5R1/USP16/PRSS3/F5/SERPINB2/S100A12/USP14/MMP14/GMFB/MMP13/C1QA
HALLMARK_DNA_REPAIR	149	0.440220893450685	1.97939391432196	3.69448432567062e-08	9.72232717281743e-08	2.8655280088304e-08	6300	tags=38%, list=11%, signal=34%	RAD51/PNP/FEN1/ZWINT/RFC3/PCNA/RALA/RFC4/SEC61A1/POLR2C/HPRT1/POLA1/TYMS/POLR2D/SSRP1/RFC2/UMPS/STX3/RAE1/PRIM1/POLD1/NELFCD/ALYREF/SF3A3/ADRM1/NUDT21/TAF13/ELOA/POLD3/CMPK2/SDCBP/BCAP31/DDB1/POM121/POLR2K/RFC5/CLP1/UPF3B/RNMT/VPS37B/TMED2/APRT/REV3L/ADA/CSTF3/PDE4B/BRF2/GUK1/ERCC3/POLR1C/RPA3/LIG1/GTF2H3/ARL6IP1/POLR2F/TAF6
HALLMARK_SPERMATOGENESIS	134	0.438068151497268	1.97482252197391	2.66695726542872e-07	6.6673931635718e-07	1.96512640610537e-07	5282	tags=33%, list=9%, signal=30%	AURKA/BUB1/CCNB2/KIF2C/CDKN3/TTK/NCAPH/SLC2A5/CDK1/DBF4/NEK2/EZH2/CSNK2A2/RFC4/PSMG1/AGFG1/TOPBP1/LPIN1/DMRT1/IL12RB2/RPL39L/TALDO1/ACRV1/TSN/CLPB/PRKAR2A/CNIH2/MTOR/PGK2/ART3/CHFR/ADAM2/HSPA4L/MTNR1A/PARP2/PCSK1N/MLLT10/VDAC3/IDE/MLF1/TCP11/ELOVL3/CST8/NF2
HALLMARK_INTERFERON_ALPHA_RESPONSE	97	0.47389559560479	2.06020786335176	4.69838894570243e-07	1.11866403469105e-06	3.29711504961574e-07	10228	tags=53%, list=18%, signal=43%	WARS1/PNPT1/TAP1/RIPK2/CXCL10/CXCL11/RSAD2/USP18/NCOA7/TRIM25/EPSTI1/PSMA3/CMPK2/IFIH1/BATF2/LAP3/PLSCR1/NMI/B2M/LY6E/EIF2AK2/LAMP3/PARP14/IFIT3/CD47/CCRL2/PSMB9/HELZ2/IFI44/OASL/IFI27/MX1/PARP9/TMEM140/IFIT2/HERC6/ADAR/IL15/ISG20/PARP12/CMTR1/IFI44L/UBE2L6/GBP4/TRIM26/HLA-C/ISG15/IL7/STAT2/IL4R/TRIM21
HALLMARK_CHOLESTEROL_HOMEOSTASIS	74	0.529738810525838	2.21074836574688	6.19674108893299e-07	1.40835024748477e-06	4.15092704521827e-07	6131	tags=45%, list=11%, signal=40%	IDI1/LGMN/ACAT2/ALDOC/FDPS/NSDHL/PLAUR/HMGCS1/DHCR7/FADS2/SQLE/MVD/LSS/NFIL3/LDLR/SCD/TMEM97/CBS/MAL2/GLDC/STARD4/EBP/TRIB3/HMGCR/PLSCR1/SREBF2/S100A11/TNFRSF12A/CYP51A1/CD9/CHKA/PDK3/ATF5
HALLMARK_ANDROGEN_RESPONSE	100	0.46415830004799	2.00079051045798	2.02885641665362e-06	4.41055742750787e-06	1.29995376810758e-06	7206	tags=39%, list=13%, signal=34%	CENPN/NDRG1/IDI1/SMS/GNAI3/XRCC6/HMGCS1/PGM3/FADS1/ABCC4/ADRM1/SCD/HMGCR/INSIG1/UBE2J1/LMAN1/B2M/CDK6/RPS6KA3/SEC24D/ACTN1/AKT1/DBI/TMPRSS2/MYL12A/UAP1/SAT1/ZBTB10/MERTK/SLC38A2/FKBP5/ACSL3/TPD52/GSR/TNFAIP8/XRCC5/RRP12/NGLY1/ITGAV
HALLMARK_MYOGENESIS	198	-0.455698	-1.7115	5.99319565355322e-06	1.24858242782359e-05	3.68003241884847e-06	10818	tags=39%, list=19%, signal=32%	DAPK2/SCHIP1/GSN/MYL4/CRAT/EIF4A2/SPDEF/COL15A1/MYO1C/MAPRE3/SH3BGR/SOD3/MYH1/CACNG1/ANKRD2/MYH8/SGCD/TGFB1/FXYD1/CAV3/SPTAN1/FOXO4/GADD45B/TNNC1/MYL6B/CD36/GNAO1/MYL7/APOD/ADCY9/FGF2/MYOG/FST/MEF2C/DMPK/MYOZ1/CAMK2B/CHRNB1/HDAC5/ENO3/PPP1R3C/SGCG/REEP1/CTF1/SORBS1/FKBP1B/SGCA/LAMA2/PYGM/FHL1/CFD/MEF2D/MYH3/BHLHE40/IGFBP7/CKMT2/ERBB3/KCNH1/STC2/MYL3/APLNR/MYOM2/SH2B1/CASQ1/OCEL1/MYOM1/COX7A1/PSEN…
HALLMARK_REACTIVE_OXYGEN_SPECIES_PATHWAY	49	0.55589442247179	2.17380965366614	3.03586792154169e-05	6.07173584308338e-05	1.78956424848773e-05	6122	tags=45%, list=11%, signal=40%	PRDX4/PFKP/TXNRD1/PRDX1/G6PD/SOD2/OXSR1/FTL/GCLM/ABCC1/PRNP/NQO1/MGST1/TXN/SELENOS/PRDX6/NDUFA6/SOD1/SRXN1/GSR/CDKN2D/SCAF4
HALLMARK_ADIPOGENESIS	200	0.339726423785953	1.58975622430646	6.25211477316402e-05	0.000120232976407	3.54370877831159e-05	5418	tags=30%, list=10%, signal=28%	TKT/YWHAG/ME1/PLIN2/PFKL/IMMT/DLAT/PGM1/MRPL15/ATP1B3/MCCC1/DHCR7/GBE1/COX7B/COQ9/UBQLN1/MTCH2/DLD/COQ3/MDH2/IDH3A/ACO2/ALDOA/PREB/GHITM/AIFM1/G3BP2/CYC1/CMPK1/CS/POR/TALDO1/SLC5A6/NDUFAB1/IDH1/CHUK/ATL2/SLC19A1/SUCLG1/ESRRA/RIOK3/SLC1A5/PHYH/GRPEL1/PTCD3/ANGPTL4/SDHB/SAMM50/ESYT1/PFKFB3/SDHC/IDH3G/ACLY/ARAF/ELOVL6/IFNGR1/NABP1/SLC25A1/UQCRC1/SOD1/ABCA1
HALLMARK_IL6_JAK_STAT3_SIGNALING	87	0.43882708900665	1.87178801420086	9.66764179034782e-05	0.00017903040352496	5.27668557757776e-05	9963	tags=47%, list=18%, signal=39%	CCL7/IL2RA/TNFRSF21/STAT1/CCR1/CXCL10/CXCL11/PTPN11/BAK1/HMOX1/CXCL1/MYD88/TLR2/INHBE/CSF2/CD38/CXCL3/IL1R2/CXCL9/TNFRSF12A/IFNGR1/REG1A/IFNAR1/CD14/TNF/CD9/OSMR/CBL/PTPN2/IL17RA/IL1B/GRB2/IL15RA/IL12RB1/CXCL13/IL13RA1/ITGA4/IL7/HAX1/STAT2/IL4R
HALLMARK_TNFA_SIGNALING_VIA_NFKB	199	0.336425822793875	1.5707138141051	0.000105585755990354	0.000188545992839918	5.55714505212391e-05	8203	tags=35%, list=14%, signal=30%	B4GALT5/GCH1/PLAUR/PANX1/VEGFA/CD80/TAP1/KYNU/SOD2/NAMPT/BCL2A1/RIPK2/SLC2A6/PHLDA2/DRAM1/CXCL10/NFIL3/CCL20/RNF19B/CXCL11/LDLR/YRDC/IL1A/BTG3/ICAM1/IFIH1/CXCL1/LITAF/SLC2A3/PLAU/TNFRSF9/TLR2/SERPINB8/MARCKS/MAP2K3/ATP2B1/CSF2/FOSL1/TNFSF9/SNN/CXCL3/PFKFB3/CEBPB/PLEK/FUT4/SAT1/ZBTB10/CCL4/PDE4B/CCRL2/TNF/ABCA1/SQSTM1/SERPINB2/INHBA/TNFAIP8/IFIT2/BIRC2/SPHK1/TUBB2A/OLR1/ID2/MYC/CCL2/MXD1/IL1B/IL15…
HALLMARK_IL2_STAT5_SIGNALING	198	0.325967994319244	1.52528982680555	0.000188097855375474	0.000324306647199094	9.55851170692066e-05	4560	tags=23%, list=8%, signal=21%	P4HA1/NDRG1/CCNE1/PNP/CDC6/SPP1/PLIN2/HUWE1/IGF2R/CDCP1/IL2RA/HK2/NCS1/RRAGD/LCLAT1/ODC1/UMPS/TNFRSF21/CASP3/CKAP4/CXCL10/NFIL3/IL10/MYO1E/NT5E/NCOA3/PHTF2/AHCY/ADAM19/PRNP/APLP1/SLC2A3/CD86/PLSCR1/TNFRSF9/CTSZ/ICOS/SLC1A5/UCK2/CSF2/CYFIP1/CTLA4/ANXA4/IL1R2/ITGAE/IFNGR1
HALLMARK_FATTY_ACID_METABOLISM	157	0.330302397570036	1.51309486660186	0.000731890141841098	0.0012198169030685	0.000359524981957031	5707	tags=29%, list=10%, signal=26%	HCCS/LDHA/IDI1/PDHA1/HSP90AA1/ME1/IL4I1/HSPH1/H2AZ1/ACAT2/SMS/NSDHL/TDO2/HMGCS1/ACSL1/ODC1/DLD/MDH1/MDH2/ACO2/ALDOA/S100A10/AADAT/IDH1/HSD17B10/ADSL/SUCLG1/CPOX/ACSL4/FH/ACOT8/SDHC/PRDX6/YWHAH/METAP1/IDH3G/DLST/TP53INP2/PPARA/PTS/CBR1/ENO2/NCAPH2/IDH3B/KMT5A
HALLMARK_PEROXISOME	104	0.353979494648173	1.5346332166162	0.00482743747809525	0.00778618948079879	0.00229487689960386	3637	tags=25%, list=6%, signal=23%	IDI1/CTPS1/SLC25A19/TOP2A/PRDX1/FDPS/IDH2/ACSL1/MSH2/SOD2/FABP6/FADS1/ABCD1/SMARCC1/IDH1/SLC35B2/NUDT19/PABPC1/PEX13/ACSL4/ACOT8/ABCB9/CLN6/CACNA1B/CRABP1/YWHAH
HALLMARK_ESTROGEN_RESPONSE_LATE	200	-0.373339	-1.40389	0.00957808828697313	0.0149657629483955	0.00441096171110605	11082	tags=41%, list=20%, signal=33%	SLC2A8/PRKAR2B/MYOF/TPBG/RET/FARP1/PTPN6/RPS6KA2/METTL3/NRIP1/DHRS2/NAB2/DCXR/ALDH3A2/WFS1/SLC27A2/PRSS23/MOCS2/AGR2/CYP4F11/RBBP8/AFF1/CCN5/TNNC1/TMPRSS3/TSPAN13/CCND1/IL17RB/HMGCS2/AREG/IGSF1/CHPT1/ITPK1/FGFR3/FAM102A/PLAAT3/SERPINA5/SCNN1A/ARL3/ABCA3/ELOVL5/CHST8/TJP3/BATF/AMFR/XBP1/CXCL12/CAV1/SERPINA3/TPSAB1/CACNA2D2/RABEP1/CELSR2/PLXNB1/ZFP36/CA12/OVOL2/FOS/SLC22A5/CISH/TFF3/SIAH2/COX6C/ANX…
HALLMARK_XENOBIOTIC_METABOLISM	199	0.277205786384536	1.29422573573025	0.0108277808856978	0.0164057286146936	0.00483537264433075	4884	tags=22%, list=9%, signal=20%	AQP9/GART/SHMT2/KARS1/GCH1/BCAT1/ATP2A2/TDO2/HPRT1/NPC1/KYNU/PTGES3/PYCR1/PGD/ACO2/ALAS1/UPP1/SSR3/MTHFD1/TMEM97/DDC/PGRMC1/HMOX1/ACP1/PAPSS2/POR/IDH1/AHCY/PPARD/NQO1/SLC1A5/ARG2/GCNT2/SMOX/HES6/SLC35B1/LONP1/ABCC2/PTS/CYP2C18/HSD17B2/CBR1/MT2A/REG1A
HALLMARK_UV_RESPONSE_DN	144	-0.383062	-1.39775	0.0222552541167584	0.0327283148775859	0.00964624017444638	11782	tags=38%, list=21%, signal=30%	EFEMP1/PTPN21/MTA1/PRKAR2B/AMPH/SMAD7/PDGFRB/SCHIP1/TGFBR2/LPAR1/PRKCE/TFPI/CACNA1A/MAP2K5/YTHDC1/PTEN/F3/CAP2/ID1/RXRA/GJA1/BDNF/CCN1/DMAC2L/CDON/PTPRM/FZD2/SMAD3/TOGARAM1/AGGF1/PEX14/DBP/PMP22/MGMT/FBLN5/DDAH1/MMP16/CDKN1B/IRS1/ICA1/SLC22A18/SPOP/CAV1/MRPS31/APBB2/PPARG/DUSP1/BHLHE40/MAGI2/RUNX1/INPP4B/DLC1/IGF1R/TGFBR3/RBPMS
HALLMARK_HEME_METABOLISM	199	0.267959616854503	1.25105697392781	0.0230332809738621	0.0329046871055172	0.00969822356794193	5906	tags=22%, list=10%, signal=20%	TFRC/SLC2A1/E2F2/GMPS/P4HA2/LAMP2/HTATIP2/SLC6A8/DCUN1D1/CTSB/MOSPD1/NARF/XK/GCLM/SLC7A11/TRIM10/MFHAS1/HDGF/RBM38/TOP1/ATG4A/SLC6A9/PICALM/SDCBP/BACH1/USP15/CPOX/OPTN/RIOK3/MAP2K3/SMOX/TMCC2/HBQ1/MPP1/SEC14L1/HMBS/SLC30A10/TCEA1/SLC10A3/LPIN2/RANBP10/MBOAT2/KDM7A/CTSE
HALLMARK_EPITHELIAL_MESENCHYMAL_TRANSITION	200	0.261812525481802	1.22515666384646	0.0432078400616431	0.0600108889745043	0.0176874199082749	5550	tags=20%, list=10%, signal=18%	CXCL8/SPP1/MMP1/CALU/PVR/MCM7/PLOD2/PLAUR/TGFBI/SLC6A8/VEGFA/COLGALT1/ITGB1/PFN2/PLOD1/SDC1/NT5E/FLNA/GREM1/FN1/PLOD3/CXCL1/LOXL2/VCAM1/APLP1/SNTB1/COPA/DKK1/COL11A1/SERPINH1/TNFRSF12A/ITGA5/CDH2/SAT1/LOX/ENO2/FBN2/CTHRC1/IGFBP3/INHBA
