# Supplementary material for: Integrated bulk RNA and single-cell RNA sequencing to identify and validate exercise-related genes for predicting the prognosis of invasive ductal carcinoma
Source: Research Square preprint supplement (doi:10.21203/rs.3.rs-8444169/v1), 2026-01-16
Supplement: Supplementary file 3 [file 0f4cd52bb3ce04a2fdfabac7.xlsx]

## Sheet: Supplementary Table 4
KEGG enrichment analysis of DE-ERGs.
ID	Description	pvalue	p.adjust	qvalue	geneID	Count
hsa04820	Cytoskeleton in muscle cells	2.22534837529044e-12	4.09464101053441e-10	3.44343380176521e-10	TPM3/COMP/ANK2/DMD/AMPD1/SNTA1/OBSCN/TTN/TPM2/COL9A3/ACTA1/MYH6/DSP/ACTC1/COL9A1/ENO3/COL9A2/MYPN	18
hsa05410	Hypertrophic cardiomyopathy	2.76579531846972e-07	2.54453169299214e-05	2.13985216744763e-05	TPM3/DMD/CAV3/SNTA1/TTN/TPM2/CACNA1C/MYH6/ACTC1	9
hsa05414	Dilated cardiomyopathy	4.5914281805463e-07	2.81607595073506e-05	2.36821032470283e-05	TPM3/DMD/CAV3/SNTA1/TTN/TPM2/CACNA1C/MYH6/ACTC1	9
hsa04261	Adrenergic signaling in cardiomyocytes	1.35285980304392e-06	6.22315509400204e-05	5.23343134335411e-05	TPM3/SCN4B/KCNE1/SCN5A/CALM2/BVES/TPM2/CACNA1C/MYH6/ACTC1	10
hsa04910	Insulin signaling pathway	4.57842641808421e-06	0.000168486092185499	0.000141690249149132	PYGM/PCK1/PHKG2/PHKA2/ELK1/GRB2/CALM2/PYGL/PHKA1	9
hsa04922	Glucagon signaling pathway	5.83588245910809e-06	0.000178967062079315	0.000150504337103314	PYGM/PCK1/PHKG2/PHKA2/CALM2/PYGL/PHKA1/LDHA	8
hsa00010	Glycolysis / Gluconeogenesis	3.29020592740459e-05	0.000864854129489205	0.000727308678689435	PCK1/PGM1/PGK1/ALDOA/LDHA/ENO3	6
hsa04260	Cardiac muscle contraction	0.000143766447652517	0.00330662829600788	0.00278074576380525	TPM3/TRDN/TPM2/CACNA1C/MYH6/ACTC1	6
hsa00500	Starch and sucrose metabolism	0.000480164049462803	0.00981668723346174	0.00825545207848328	PYGM/PGM1/PYGL/GAA	4
hsa04921	Oxytocin signaling pathway	0.000549244584918647	0.0101061003625031	0.00849883726137275	KCNJ3/ELK1/CALM2/KCNJ2/CACNA1C/NPPA/RYR1	7
hsa05412	Arrhythmogenic right ventricular cardiomyopathy	0.0011542441589479	0.0193073568405831	0.0162367360158222	DMD/CAV3/SNTA1/CACNA1C/DSP	5
hsa04912	GnRH signaling pathway	0.00163803625575452	0.0251165559215693	0.021122046455782	EGR1/ELK1/GRB2/CALM2/CACNA1C	5
hsa04020	Calcium signaling pathway	0.0023067220016278	0.032648988330732	0.0274565290882014	PHKG2/NTRK2/TRDN/PHKA2/CALM2/PHKA1/CACNA1C/RYR1	8
hsa04510	Focal adhesion	0.00263235362878838	0.0342544685358058	0.0288066754849168	COMP/CAV3/ELK1/GRB2/COL9A3/COL9A1/COL9A2	7
hsa04974	Protein digestion and absorption	0.00279248384802765	0.0342544685358058	0.0288066754849168	COL12A1/COL9A3/COL13A1/COL9A1/COL9A2	5
hsa04066	HIF-1 signaling pathway	0.00341500786088998	0.0392725904002348	0.0330267207599229	PGK1/ALDOA/LDHA/NPPA/ENO3	5
hsa04924	Renin secretion	0.00370958626636922	0.0399395882874511	0.0335876400357855	CALM2/KCNJ2/CACNA1C/NPPA	4
hsa05416	Viral myocarditis	0.00390713363681587	0.0399395882874511	0.0335876400357855	DMD/CAV3/SNTA1/MYH6	4
hsa04151	PI3K-Akt signaling pathway	0.00598363202188591	0.0579467522119478	0.0487309643887662	COMP/PCK1/NTRK2/CSF3/GRB2/COL9A3/COL9A1/COL9A2/NRTN	9
hsa04512	ECM-receptor interaction	0.00911917250888055	0.0799013210301915	0.0671939026970146	COMP/COL9A3/COL9A1/COL9A2	4
hsa04727	GABAergic synapse	0.00911917250888055	0.0799013210301915	0.0671939026970146	GAD1/CACNA1C/SLC6A1/GABRR1	4
hsa05144	Malaria	0.0109031633679962	0.0911900936232407	0.0766873212964324	COMP/GYPC/CSF3	3
hsa04713	Circadian entrainment	0.0122442450121546	0.0979539600972367	0.0823754698758226	KCNJ3/CALM2/CACNA1C/RYR1	4
hsa04022	cGMP-PKG signaling pathway	0.0185064071725519	0.141882454989564	0.119317625191453	GATA4/CALM2/CACNA1C/NPPA/MYH6	5
hsa04714	Thermogenesis	0.0212644944822203	0.156506679389142	0.131616029005743	PNPLA2/GRB2/SLC25A20/ATP5F1E/NPPA/COA3	6
hsa04722	Neurotrophin signaling pathway	0.0247765256932008	0.17368416616271	0.146061627150563	NTRK2/MAGED1/GRB2/CALM2	4
hsa00650	Butanoate metabolism	0.0254862635130063	0.17368416616271	0.146061627150563	HADHA/GAD1	2
hsa01230	Biosynthesis of amino acids	0.0318910685482961	0.196990838512282	0.165661631929665	PGK1/ALDOA/ENO3	3
hsa00030	Pentose phosphate pathway	0.0329739574747976	0.196990838512282	0.165661631929665	PGM1/ALDOA	2
hsa00410	beta-Alanine metabolism	0.0329739574747976	0.196990838512282	0.165661631929665	HADHA/GAD1	2
hsa00052	Galactose metabolism	0.0349650521766911	0.196990838512282	0.165661631929665	PGM1/GAA	2
hsa00640	Propanoate metabolism	0.0349650521766911	0.196990838512282	0.165661631929665	HADHA/LDHA	2
hsa04814	Motor proteins	0.0353298786462245	0.196990838512282	0.165661631929665	TPM3/TPM2/ACTA1/MYH6/ACTC1	5
hsa00051	Fructose and mannose metabolism	0.0390831620574593	0.211508877016839	0.177870737537044	GMPPB/ALDOA	2
hsa01232	Nucleotide metabolism	0.0437124391524625	0.226695343574674	0.190641965134308	TK2/AMPD1/RRM2B	3
hsa00250	Alanine	0.0455854766970811	0.226695343574674	0.190641965134308	GAD1/ALDH4A1	2
hsa01250	Biosynthesis of nucleotide sugars	0.0455854766970811	0.226695343574674	0.190641965134308	PGM1/GMPPB	2
