# Supplementary material for: Integrated bulk RNA and single-cell RNA sequencing to identify and validate exercise-related genes for predicting the prognosis of invasive ductal carcinoma
Source: Research Square preprint supplement (doi:10.21203/rs.3.rs-8444169/v1), 2026-01-16
Supplement: Supplementary file 4 [file 14b6a61b02c4c86121afbe1e.xlsx]

## Sheet: Supplementary Table 8
Gene set enrichment analysis (GSEA) pathways for TRDN
ID	setSize	enrichmentScore	NES	pvalue	p.adjust	qvalue	rank	leading_edge	core_enrichment
HALLMARK_KRAS_SIGNALING_UP	200	0.572395266581269	1.90210247339399	1e-10	1.23333333333333e-09	4.91228070175439e-10	9864	tags=46%, list=17%, signal=38%	CIDEA/TMEM100/IL33/G0S2/RBP4/RELN/TSPAN7/PECAM1/ADGRL4/ABCB1/HSD11B1/ALDH1A2/GNG11/AKAP12/SPARCL1/TFPI/MMD/IGF2/ETS1/APOD/CFH/ADGRA2/NAP1L2/IL7R/MTMR10/DNMBP/PTGS2/EPB41L3/PLVAP/ANO1/FLT4/ENG/IRF8/CMKLR1/SNAP25/NRP1/IKZF1/SPRY2/HDAC9/ANGPTL4/WNT7A/NGF/ARG1/BMP2/GYPC/SPON1/FUCA1/PLAT/CCND2/TNFRSF1B/SCN1B/CAB39L/F13A1/TLR8/PIGR/LY96/SCG3/CD37/IL10RA/ITGA2/PTPRR/TNFAIP3/FGF9/DOCK2/KLF4/DUSP6/ITGBL1/…
HALLMARK_UV_RESPONSE_DN	144	0.571303918841203	1.87191227804624	1e-10	1.23333333333333e-09	4.91228070175439e-10	10397	tags=48%, list=18%, signal=39%	PPARG/CAV1/DLC1/TGFBR2/TFPI/SYNE1/PTGFR/FYN/TGFBR3/SERPINE1/NR3C1/MAP1B/DUSP1/MET/CELF2/MMP16/ID1/FBLN5/PLPP3/HAS2/GRK5/MGLL/IRS1/ATRX/PTPRM/NRP1/ATXN1/NEK7/APBB2/ADD3/IGF1R/PDGFRB/PRDM2/SYNJ2/SCAF8/ATP2B4/EFEMP1/ADGRL2/ITGB3/ACVR2A/KIT/SCHIP1/AKT3/LAMC1/CDON/RUNX1/PRKCA/PTPN21/DAB2/RGS4/SMAD3/TJP1/PRKCE/PIK3CD/INPP4B/TOGARAM1/RASA2/NIPBL/NOTCH2/F3/BDNF/CCN1/PIAS3/PHF3/PMP22/ATP2B1/MAGI2/ATRN/CDC…
HALLMARK_MYOGENESIS	198	0.527905577010471	1.75314027636404	1e-10	1.23333333333333e-09	4.91228070175439e-10	15333	tags=49%, list=27%, signal=36%	CD36/GPX3/FHL1/IGF1/CASQ2/ITGA7/SGCG/TNNT3/PYGM/MYOM1/MYH11/SORBS1/CKMT2/FGF2/LAMA2/MYH1/DES/PTGIS/CFD/MEF2C/HRC/APLNR/COL15A1/APOD/SGCA/MEF2A/SOD3/MYH2/DMD/LDB3/NOS1/COX7A1/MYOM2/IGFBP7/ACTC1/GSN/MYH4/MYH8/PKIA/RB1/CRYAB/MYLK/CAV3/MYL1/MYL2/COL6A3/SCHIP1/GNAO1/SGCD/LSP1/NCAM1/SSPN/ADAM12/TGFB1/MYH7/TNNC2/CASQ1/HBEGF/ACHE/RYR1/TAGLN/ITGB1/MYF6/GJA5/FXYD1/ANKRD2/CDH13/SPTAN1/PPP1R3C/SORBS3/PSEN2/H…
HALLMARK_EPITHELIAL_MESENCHYMAL_TRANSITION	200	0.498520363401212	1.65661191072775	2.271482952647e-08	2.10112173119848e-07	8.36862140448896e-08	14677	tags=53%, list=26%, signal=39%	ABI3BP/SGCG/PCOLCE2/SLIT2/GEM/FGF2/LAMA2/DST/IL6/SFRP4/SCG2/TGFBR3/SLIT3/CDH6/SERPINE1/ECM2/ELN/TFPI2/MATN2/CXCL12/FERMT2/LRP1/OXTR/FBLN5/CRLF1/FSTL1/CCN2/DCN/MSX1/FUCA1/SFRP1/MYLK/WIPF1/MEST/PDGFRB/IGFBP4/FOXC2/PTX3/VCAN/MMP3/COL6A3/ITGB3/ITGAV/SGCB/LAMC1/SGCD/FBN1/VEGFC/GLIPR1/DAB2/LAMA3/TIMP1/CXCL6/ADAM12/RGS4/TGFB1/ITGA2/TNFAIP3/PTHLH/SERPINE2/TIMP3/ACTA2/TAGLN/FAP/ITGB1/CDH11/POSTN/NOTCH2/FB…
HALLMARK_APICAL_JUNCTION	198	0.469523917727172	1.55925856200495	1.39468249805592e-06	1.03206504856138e-05	4.11064315216483e-06	8740	tags=31%, list=15%, signal=27%	CADM3/PECAM1/CLDN11/VWF/SLIT2/CLDN5/CD34/ADAM23/NRXN2/CLDN19/FLNC/CD209/CDH6/ICAM2/CADM2/NECTIN3/COL17A1/JAM3/DSC1/CLDN15/ITGA10/PARVA/EPB41L2/ACTC1/NLGN3/SKAP2/IRS1/CDH8/NEGR1/RASA1/PTPRC/TRO/NF1/MAP3K20/COL9A1/LAYN/ITGA9/LIMA1/VCAN/ADRA1B/AKT3/PKD1/ADAMTS5/ARHGEF6/FBN1/LAMA3/ITGA2/ACTG2/MAPK11/TSC1/TJP1/EGFR/CLDN18/ITGB1/WNK4/CDH11/FYB1/NEXN/CALB2/GNAI1/TRAF1/EVL
HALLMARK_COAGULATION	138	0.487796344465438	1.59707790387411	1.46608175131601e-05	7.24333815016882e-05	2.88497109821802e-05	14137	tags=42%, list=25%, signal=32%	PECAM1/VWF/PROS1/CFD/F10/LEFTY2/A2M/TF/F2RL2/FYN/CFH/KLF7/SERPINE1/THBD/RAPGEF3/TFPI2/CFI/LRP1/F8/GSN/GP1BA/ITIH1/CAPN5/RGN/PLAT/HMGCS2/MMP3/ITGB3/ANXA1/MASP2/FBN1/TIMP1/ITGA2/MMP8/DUSP6/TIMP3/PLEK/F3/CPQ/DPP4/C3/HTRA1/THBS1/CTSO/CTSH/P2RY1/KLK8/MEP1A/COMP/PDGFB/C1S/DCT/SERPING1/SPARC/ISCU/CTSK/GDA/CTSE
HALLMARK_IL2_STAT5_SIGNALING	198	0.452522980373638	1.50279954867304	1.54985538723361e-05	7.24333815016882e-05	2.88497109821802e-05	5618	tags=28%, list=10%, signal=26%	ITIH5/SELP/SHE/ABCB1/PLPP1/SCN9A/F2RL2/BMPR2/SH3BGRL2/IL1RL1/SELL/SOCS2/CCR4/SNX9/IL3RA/TNFRSF8/PENK/PRKCH/HOPX/RORA/KLF6/IRF8/EOMES/CD79B/IKZF2/FGL2/AHNAK/LRRC8C/PTH1R/NRP1/IRF4/CDKN1C/SYT11/IL18R1/BMP2/CD48/POU2F1/CCND2/GUCY1B1/TNFRSF1B/IGF1R/RHOH/MAP6/BCL2/SLC2A3/TNFSF11/ITGAV/NCOA3/IL10RA/SWAP70/PLAGL1/NFKBIZ/IKZF4/DENND5A/PTGER2/CDC42SE2
HALLMARK_REACTIVE_OXYGEN_SPECIES_PATHWAY	49	-0.416793	-2.2252	1.56612716760407e-05	7.24333815016882e-05	2.88497109821802e-05	5397	tags=43%, list=10%, signal=39%	PRDX6/TXNRD2/MGST1/PTPA/ATOX1/CDKN2D/SCAF4/NDUFS2/ABCC1/PRDX2/PRDX4/NDUFA6/SOD1/HMOX2/LAMTOR5/ERCC2/NDUFB4/TXN/PRDX1/PFKP/G6PD
HALLMARK_INFLAMMATORY_RESPONSE	199	0.441815744823271	1.46841102449105	5.69677994476754e-05	0.000219128347162614	8.72772933222362e-05	13118	tags=38%, list=23%, signal=29%	CALCRL/TACR1/SELE/APLNR/IL6/GPC3/CCR7/SLC4A4/SELL/CD69/SERPINE1/PTGER4/IL7R/GPR183/CSF3/BTG2/MET/KCNA3/NMUR1/NPFFR2/CCL24/KLF6/CMKLR1/HAS2/GP1BA/SCARF1/SLAMF1/IL12B/IL18R1/NLRP3/BEST1/CD48/VIP/CCL17/TNFRSF1B/SCN1B/IL1R1/ITGB3/KCNMB2/PTPRE/ACVR2A/ABCA1/IL10RA/CCL22/STAB1/TIMP1/IL18RAP/CXCL6/PTGER2/SLC28A2/PIK3R5/LCK/HBEGF/FZD5/HRH1/P2RX7/F3/CD40/SLC7A2/EDN1/EREG/ATP2B1/EBI3/IL4R/CXCR6/LCP2/GPR132/…
HALLMARK_TNFA_SIGNALING_VIA_NFKB	199	0.441008524596208	1.46572816156799	5.92238776115174e-05	0.000219128347162614	8.72772933222362e-05	9989	tags=33%, list=18%, signal=27%	G0S2/GEM/IL6/KLF2/CD69/EGR3/NR4A3/SERPINE1/PTGER4/EGR2/IL7R/GPR183/BTG2/FOSB/DUSP1/PTGS2/KLF9/FOS/ZFP36/KLF6/CXCL2/PLPP3/REL/JAG1/SGK1/TIPARP/DNAJB4/NFAT5/IL12B/BMP2/EGR1/NR4A1/PTX3/ETS2/SLC2A3/PTPRE/PER1/CFLAR/ABCA1/IL6ST/CXCL6/DENND5A/SOCS3/SMAD3/TNFAIP3/KLF4/NFE2L2/PHLDA1/HBEGF/BIRC3/PLEK/NR4A2/IRS2/F3/RHOB/TRAF1/CCNL1/JUN/TNFAIP8/CCN1/TUBB2A/EDN1/AREG/TSC22D1/ATP2B1
HALLMARK_COMPLEMENT	200	0.442040049615682	1.46892457153786	8.51689114752514e-05	0.000286477247689482	0.000114101890971629	14223	tags=39%, list=25%, signal=29%	CD36/KCNIP2/F10/GNG2/ZEB1/CR1/NOTCH4/IL6/FYN/CFH/GZMK/FCN1/CR2/CD40LG/HPCAL4/SERPINE1/TFPI2/ZFPM2/LRP1/SH2B3/F8/DOCK9/F5/CASP10/GP1BA/ITIH1/LIPA/DOCK10/PRCP/PIK3CG/PLA2G4A/PIK3CA/CPM/CBLB/PLAT/SCG3/SPOCK2/DYRK2/TIMP1/GZMA/JAK2/PIK3R5/TNFAIP3/MMP8/LCK/DUSP6/PLEK/ERAP2/DOCK4/F3/CPQ/CDH13/DPP4/F7/CD46/AKAP10/C3/KLK1/CTSO/CTSH/CDA/PCLO/LCP2/PPP2CB/ACTN2/TIMP2/CCL5/GMFB/ANXA5/PRDM4/PDGFB/C1S/PLA2G7/AP…
HALLMARK_XENOBIOTIC_METABOLISM	199	0.438017020771746	1.45578565216873	0.000104345762791253	0.000321732768606362	0.000128143919217328	4998	tags=20%, list=9%, signal=18%	CD36/IGF1/PDK4/RBP4/ADH1C/ATOH8/AKR1C2/ABCD2/CDO1/CES1/PROS1/HSD11B1/MAOA/AOX1/F10/AKR1C3/SERPINE1/TAT/MAN1A1/PTGDS/CAT/FMO3/IRF8/CYP1A2/CRP/ITIH1/ARG1/PEMT/SERPINA6/ENTPD5/IGFBP4/ENPEP/UGDH/IL1R1/ETS2/NDRG2/FMO1/SLC12A4/ALDH3A1
HALLMARK_TGF_BETA_SIGNALING	54	0.543911877934679	1.66856364451354	0.000369788263469015	0.00105247428833489	0.000419193173163256	16243	tags=56%, list=29%, signal=40%	LEFTY2/SPTBN1/BMPR2/LTBP2/SERPINE1/ENG/ID1/CDKN1C/BMP2/SKIL/APC/PPM1A/MAP3K7/ARID4B/TGFB1/SMAD3/TJP1/HIPK2/ID3/ACVR1/THBS1/TRIM33/SLC20A1/XIAP/CTNNB1/WWTR1/SKI/KLF10/SMAD1/SMURF1
HALLMARK_KRAS_SIGNALING_DN	200	0.429228375198976	1.42635063876954	0.000448856704998447	0.00118626414892447	0.000472480742103629	18345	tags=47%, list=32%, signal=32%	SLC16A7/NRIP2/PTGFR/ITIH3/SYNPO/EPHA5/CNTFR/CD40LG/TSHB/DCC/BTG2/TCL1A/SELENOP/NOS1/WNT16/SLC12A3/ABCB11/THRB/ACTC1/EDAR/ZBTB16/GP1BA/SGK1/PRKN/CPA2/IL12B/RYR2/SKIL/IRS4/KMT2D/TENM2/KCND1/CPB1/GP2/STAG3/DLK2/ATP4A/CPEB3/KCNMB1/PLAG1/MYH7/P2RY4/KRT1/MTHFR/FGFR3/RYR1/FGF16/PDCD1/P2RX6/SOX10/ATP6V1B1/SLC6A3/NR4A2/ARPP21/UGT2B17/SSTR4/ADRA2C/SERPINA10/EDN1/MYO15A/TAS2R4/ASB7/PROP1/CCR8/KLK8/CHRNG/ARH…
HALLMARK_ALLOGRAFT_REJECTION	200	0.427344180072582	1.42008934972766	0.000535796781333576	0.00132163206062282	0.000526396837801408	14223	tags=40%, list=25%, signal=30%	CCL19/F2R/IL6/CFP/ETS1/IL2/CD1D/CD40LG/PRKCB/TRAT1/ITK/CD28/IRF8/CD79A/PTPRC/IRF4/CCR2/IL16/HDAC9/IL12B/NLRP3/CD96/STAT4/CD3G/ST8SIA4/SRGN/CCND2/CD8B/CD3E/ELANE/CD8A/CD247/CCL13/ACVR2A/CRTAM/MAP3K7/CCL22/STAB1/TIMP1/IL18RAP/GZMA/ZAP70/CD3D/TGFB1/FGR/JAK2/KRT1/CD2/LCK/ITGAL/EGFR/SIT1/MAP4K1/ACHE/KLRD1/FYB1/CXCR3/PRF1/HCLS1/LY75/SOCS5/CCR5/NCR1/CD40/HLA-E/EREG/LTB/GPR65/IL4R/LCP2/HLA-DOA/CCL5/CD4/G…
HALLMARK_ADIPOGENESIS	200	0.41880884183131	1.39172592863065	0.00100325392285567	0.002303744930786	0.000917565548534963	4662	tags=18%, list=8%, signal=17%	ADIPOQ/LEP/FABP4/CIDEA/CD36/CAVIN2/GPX3/ITIH5/ITGA7/LIPE/LPL/ENPP2/PPARG/GPAM/ACADL/SORBS1/LIFR/CD302/SPARCL1/FZD4/COL15A1/ITSN1/PHLDB1/CAT/ANGPT1/LAMA4/MRAP/MGLL/PTGER3/ANGPTL4/ESYT1/PEMT/MYLK/CAVIN1/SNCG/MTARC2/ABCA1
HALLMARK_BILE_ACID_METABOLISM	112	0.447619200008198	1.45125226500005	0.0010584774006314	0.002303744930786	0.000917565548534963	6894	tags=25%, list=12%, signal=22%	ABCA8/LIPE/ABCA9/ABCA6/ABCD2/BMP6/ALDH1A1/SLCO1A2/RXRG/NR3C2/CH25H/HSD17B11/CAT/SULT1B1/CYP7B1/AGXT/ATXN1/SERPINA6/CYP46A1/CYP7A1/ABCA5/ABCA1/HSD17B4/NEDD4/LCK/PNPLA8/SOAT2/NUDT12
HALLMARK_ANGIOGENESIS	36	0.535249638184652	1.55863459332644	0.00500573162117994	0.0102895594435366	0.00409825980681399	13411	tags=53%, list=24%, signal=40%	LPL/SLCO2A1/KCNJ8/THBD/JAG1/NRP1/FSTL1/MSX1/CCND2/VCAN/ITGAV/TIMP1/CXCL6/POSTN/FGFR1/PDGFA/LUM/SERPINA5/COL3A1
HALLMARK_IL6_JAK_STAT3_SIGNALING	87	0.454747142505423	1.45230799678799	0.0071902628846383	0.0140020908806114	0.00557693520138151	14151	tags=40%, list=25%, signal=30%	CD36/LEPR/PLA2G2A/A2M/IL6/ACVRL1/CNTFR/CSF2RB/IL3RA/IL18R1/STAM2/TNFRSF1B/IL1R1/ITGB3/ITGA4/IL6ST/CRLF2/SOCS3/TGFB1/PIK3R5/CBL/DNTT/JUN/IL10RB/EBI3/LTB/CD38/IL4R/IFNAR1/CSF2RA/ACVR1B/CXCL9/IL9R/IFNGR1/IL2RG
HALLMARK_ANDROGEN_RESPONSE	100	0.426075734040104	1.37057612759159	0.0106969485633605	0.019789354842217	0.0078819620993183	10368	tags=34%, list=18%, signal=28%	PLPP1/LIFR/AKAP12/SELENOP/STEAP4/ADAMTS1/SGK1/IQGAP2/ABHD2/PTK2B/ARID5B/APPBP2/MAK/KLK3/STK39/ITGAV/RPS6KA3/PTPN21/SPCS3/UBE2J1/SLC26A2/INPP4B/HERC3/XRCC5/ELK4/HPGD/SEC24D/MAF/ALDH1A3/TNFAIP8/CDC14B/KLK2/TSC22D1/PGM3
HALLMARK_HEME_METABOLISM	199	0.376609943440076	1.2516941719711	0.0208772900465728	0.0367837967487236	0.0146507298572441	9819	tags=28%, list=17%, signal=23%	ACKR1/ALDH1L1/EPB42/TAL1/CLIC2/GYPE/TNS1/HBB/ADD2/SNCA/NR3C1/ABCG2/BTG2/CAT/TRAK2/SIDT2/ALAS2/ADD1/ANK1/HBBP1/BMP2K/NEK7/FOXO3/GYPC/SLC4A1/DAAM1/KAT2B/SEC14L1/ACSL6/EZH1/SLC30A1/LMO2/SPTB/BNIP3L/TSPO2/KDM7A/DMTN/DCAF10/ERMAP/TYR/PICALM/SLC22A4/GATA1/CDC27/EPB41/BTRC/KLF3/ARHGEF12/SPTA1/YPEL5/KHNYN/C3/TSPAN5/CCDC28A/TNRC6B/GYPB
HALLMARK_HEDGEHOG_SIGNALING	36	0.480139441944086	1.39815497376634	0.0359342915811088	0.0604349449318648	0.0240708173270585	6910	tags=33%, list=12%, signal=29%	GLI1/SCG2/CNTFR/RTN1/RASA1/NRP1/NF1/ETS2/CRMP1/HEY1/DPYSL2/ACHE
HALLMARK_APICAL_SURFACE	44	0.452824600359168	1.35739725677082	0.0487309644670051	0.0783932906643125	0.0312235012603236	14151	tags=39%, list=25%, signal=29%	SLC22A12/SLC2A4/SRPX/CD160/PKHD1/MAL/SCUBE1/AKAP7/NTNG1/GHRL/MDGA1/ATP8B1/TMEM8B/AFAP1L2/IL2RB/RHCG/IL2RG
