# Supplementary material for: Integrated bulk RNA and single-cell RNA sequencing to identify and validate exercise-related genes for predicting the prognosis of invasive ductal carcinoma
Source: Research Square preprint supplement (doi:10.21203/rs.3.rs-8444169/v1), 2026-01-16
Supplement: Supplementary file 5 [file 233eea3e056fa7900c1a6ee9.xlsx]

## Sheet: Supplementary Table 1
206 exercise-related genes (ERGs)
name
ADGRL1
CADM1
CSF3
DUSP6
EGR1
EGR2
EGR4
ELK1
GABRR1
GAD1
GIT1
GPR37L1
GRB2
IL16
LDHA
MAGED1
MAP2K2
MAPK1
MFGE8
NPTX2
NPY
NRTN
NTRK2
ODC1
PCK1
PRKCI
SCG2
SLC6A1
SYN1
UBE2B
VGF
ACAD9
ALDOA
AMPD1
AMPD3
CACNA1S
CAV3
DNA2
DPM3
RYR1
SLC25A20
ABCA3
ABCC9
ACTA1
ACTC1
AGK
ALDH4A1
ATP11A
ATP5F1A
ATP5F1D
ATP5F1E
ATP5MK
ATPAF1
ATPAF2
BCS1L
BICD2
BVES
C1QBP
CAVIN1
CCDC78
CHCHD10
CITED2
COA3
COL12A1
COL13A1
COL9A1
COL9A2
COL9A3
COMP
COQ8A
CPT2
DMD
DPP9
DSP
ENO3
EPB41
FAM13A
FARSA
FARSB
FLAD1
GAA
GATA4
GATA5
GATA6
GCDH
GJA5
GMPPB
GYPC
GYS1
HADHA
HADHB
HINT1
ISCU
KBTBD13
KCNA5
KCNE1
KCNE2
KCNJ2
KCNJ3
KCNJ5
KCNQ1
KLHL41
LAMP2
MGME1
MIEF2
MLIP
MRPS2
MT-ATP6
MT-ATP8
MT-CO1
MT-CO2
MT-CO3
MT-CYB
MT-ND1
MT-ND4
MT-ND5
MT-ND6
MT-TE
MT-TF
MT-TH
MT-TK
MT-TL1
MT-TN
MT-TQ
MT-TS1
MT-TS2
MT-TW
MUC5B
MYH6
MYL4
MYPN
NDUFS4
NEB
NKX2-5
NKX2-6
NPPA
NUP155
OBSCN
PARN
PFKM
PGAM2
PGK1
PGM1
PHKA1
PHKA2
PHKB
PHKG2
PIEZO2
PITX2
PNPLA2
POLG
POLG2
POLR2A
PUS1
PYGL
PYGM
RNASEH1
RRM2B
RSPH4A
RSPH9
RTEL1
SCN1B
SCN2B
SCN3B
SCN4B
SCN5A
SDHA
SFTPA1
SFTPA2
SFTPC
SLC18A3
SLC22A12
SLC25A32
SLC25A4
SLC2A9
SPTA1
SPTB
STN1
SURF1
SVIL
TAFAZZIN
TBX20
TERC
TERT
TK2
TLL1
TMEM126B
TOP3A
TPM2
TPM3
TRMT5
TTN
TWNK
YARS
ANK2
CACNA1C
CALM1
CALM2
CALM3
KCNH2
NOS1AP
SCN10A
SNTA1
TBX5
TRDN
AKAP9
