# Supplementary material for: Integrated bulk RNA and single-cell RNA sequencing to identify and validate exercise-related genes for predicting the prognosis of invasive ductal carcinoma
Source: Research Square preprint supplement (doi:10.21203/rs.3.rs-8444169/v1), 2026-01-16
Supplement: Supplementary file 6 [file 44219ee30212d553609ac64c.xlsx]

## Sheet: Sheet1
Expression trends of prognostic ERGs
ID	baseMean	log2FoldChange	lfcSE	stat	pvalue	padj	change
TRDN	62.9225263295185	-4.00637	0.318012406182276	-12.5982	2.16152734098942e-36	2.83242416951335e-35	DOWN
PGK1	28439.8566011359	0.945259253010665	0.0818228474027386	11.5525098797653	7.16955884542537e-31	7.41715266543428e-30	UP
SCG2	152.034064934217	1.74480878368365	0.17871724851799	9.76295683909892	1.62351358897876e-22	1.09534682980561e-21	UP
CALM2	33300.5707137429	0.510792636738325	0.0591099756218428	8.64139481305373	5.55308601381513e-18	2.88004237346724e-17	UP
PHKA1	1787.07078736644	0.662669931175273	0.0822355786247279	8.05819016850708	7.74322933143357e-16	3.52123466328483e-15	UP
MLIP	21.7219374349606	-1.23864	0.223917547388538	-5.53166	3.17205607133432e-08	8.48365786528157e-08	DOWN
GYPC	1414.66775992462	-2.01555	0.114448463277681	-17.611	2.02833905404735e-69	8.75822814992447e-68	DOWN
IL16	1028.92288039769	-0.514596	0.121329518255967	-4.24131	2.22216441245912e-05	4.58719795133748e-05	DOWN
