# Supplementary material for: Integrated bulk RNA and single-cell RNA sequencing to identify and validate exercise-related genes for predicting the prognosis of invasive ductal carcinoma
Source: Research Square preprint supplement (doi:10.21203/rs.3.rs-8444169/v1), 2026-01-16
Supplement: Supplementary file 7 [file 4562f8dd6652af9471bcd976.xlsx]

## Sheet: Supplementary Table 10
Gene set enrichment analysis (GSEA) pathways for SCG2
ID	setSize	enrichmentScore	NES	pvalue	p.adjust	qvalue	rank	leading_edge	core_enrichment
HALLMARK_E2F_TARGETS	200	-0.841406	-4.07785	1e-10	2.38095238095238e-10	3.50877192982456e-11	4656	tags=74%, list=8%, signal=69%	DEK/SMC4/RAD1/POLD3/CDC25B/USP1/XRCC6/CDKN2C/RPA1/LYAR/RFC3/BRCA1/ANP32E/NAA38/SHMT1/POLE4/RAD21/ASF1A/RNASEH2A/NBN/DUT/XPO1/TRA2B/MMS22L/PRDX4/NOLC1/RAD51C/DNMT1/MKI67/NUP205/CTPS1/RBBP7/DIAPH3/NCAPD2/CDK4/AK2/RRM2/HMGB3/TIPIN/PHF5A/SLBP/MCM6/SRSF1/MCM5/TUBB/GINS4/BUB1B/DCTPP1/TMPO/NUP107/MTHFD2/ILF3/JPT1/TOP2A/TCF19/E2F8/CENPE/CDKN3/HNRNPD/STMN1/MCM2/DONSON/RPA3/CIT/PSMC3IP/HMMR/SPAG5/POLD1/SPC…
HALLMARK_MYC_TARGETS_V1	199	-0.834061	-4.06068	1e-10	2.38095238095238e-10	3.50877192982456e-11	5533	tags=76%, list=10%, signal=69%	IARS1/BUB3/PSMC6/PRPS2/PSMD7/PSMD1/DEK/IFRD1/RPL18/PSMA6/RAD23B/KPNB1/PGK1/YWHAQ/ABCE1/HNRNPA1/USP1/RPS2/XRCC6/SERBP1/SRM/UBE2L3/RSL1D1/TFDP1/CAD/EPRS1/GNL3/SLC25A3/VDAC1/UBA2/HDAC2/CNBP/DUT/PABPC1/XPO1/POLE3/NPM1/TRA2B/SSB/SET/PHB2/TCP1/PRDX4/PWP1/APEX1/SRPK1/NOLC1/XPOT/TOMM70/GLO1/FBL/CTPS1/CCT5/NHP2/NCBP2/SNRPB2/CDK4/EXOSC7/YWHAE/KARS1/SRSF7/CLNS1A/HNRNPU/SF3B3/MCM6/HDDC2/SRSF1/MCM5/SRSF3/LSM7…
HALLMARK_MYC_TARGETS_V2	57	-0.90535	-3.68457	1e-10	2.38095238095238e-10	3.50877192982456e-11	3855	tags=86%, list=7%, signal=80%	RCL1/NOP2/SRM/RABEPK/GNL3/IPO4/TMEM97/NPM1/NDUFAF4/WDR43/NOLC1/PPAN/SLC29A2/PRMT3/NIP7/CDK4/MPHOSPH10/MCM5/DCTPP1/GRWD1/NOP16/AIMP2/IMP4/TCOF1/RRP12/RRP9/MYBBP1A/NOP56/PLK4/PES1/CBX3/SUPV3L1/TFB2M/MCM4/MRTO4/WDR74/NOC4L/PUS1/BYSL/FARSA/SLC19A1/PLK1/EXOSC5/PA2G4/LAS1L/TBRG4/HSPD1/UNG/HSPE1
HALLMARK_G2M_CHECKPOINT	200	-0.732501	-3.55005	1e-10	2.38095238095238e-10	3.50877192982456e-11	5032	tags=64%, list=9%, signal=59%	E2F3/SS18/AMD1/PRMT5/MNAT1/SMC4/RAD23B/KPNB1/UPF1/SQLE/CDC25B/NUSAP1/SMC2/CDKN2C/HMGN2/TFDP1/RAD21/HIRA/PTTG3P/H2BC12/SRSF10/KNL1/UCK2/XPO1/ATF5/KIF20B/TRA2B/ORC5/NOLC1/EWSR1/NSD2/CBX1/MKI67/SLC7A5/CDK4/HMGB3/RBL1/INCENP/FANCC/HNRNPU/MCM6/SRSF1/SAP30/MCM5/SFPQ/E2F2/PRC1/CENPF/TMPO/ILF3/JPT1/TOP2A/CENPE/CDKN3/HNRNPD/STMN1/FBXO5/MCM2/DBF4/KIF15/KIF23/HMMR/CDC7/CHMP1A/TACC3/DDX39A/POLQ/NCL/BUB1/LMNB…
HALLMARK_OXIDATIVE_PHOSPHORYLATION	200	-0.7282	-3.5292	1e-10	2.38095238095238e-10	3.50877192982456e-11	6534	tags=62%, list=12%, signal=56%	ECH1/NDUFS7/COX15/MGST3/SLC25A4/TIMM9/NQO2/MRPL34/NDUFA7/MRPS11/RHOT2/CS/ATP5F1D/DECR1/NDUFA6/UQCR11/ATP5F1A/ATP5MG/SDHA/COX7C/MTX2/MRPL35/PHYH/ATP5MC2/NDUFA2/ATP5F1E/SLC25A3/VDAC1/NDUFB5/FXN/ATP5PF/COX4I1/AFG3L2/NDUFB8/IDH3B/IMMT/UQCR10/HTRA2/PHB2/NDUFB7/IDH2/HSPA9/MRPS22/NDUFS2/NDUFA4/TIMM8B/NDUFA3/NDUFB1/SDHB/TOMM70/NDUFB4/HCCS/ATP5PB/SDHC/NDUFC1/COX10/NDUFB3/BAX/COX17/ECHS1/ATP6V0B/NDUFB2/VDA…
HALLMARK_DNA_REPAIR	149	-0.643715	-2.9386	1e-10	2.38095238095238e-10	3.50877192982456e-11	6445	tags=58%, list=11%, signal=51%	DAD1/RAD52/GTF2A2/TAF6/POLR2E/ERCC3/POLR1D/DGCR8/NT5C3A/ELOA/NME3/POLR3C/POLA1/POLD3/MRPL40/AAAS/POLB/GTF2H5/SEC61A1/ERCC2/RFC3/DDB1/EDF1/CETN2/POLE4/CANT1/TAF1C/UPF3B/RBX1/SF3A3/DUT/SNAPC4/NT5C/TARBP2/NELFB/POLR2D/POLR2C/ITPA/GUK1/VPS37B/CLP1/NME4/COX17/VPS28/NCBP2/DGUOK/TMED2/MPC2/SUPT5H/ZNF707/POLR2J/ARL6IP1/POLR2F/APRT/RPA3/BCAP31/TYMS/POLD1/LIG1/POLR1H/PRIM1/POLR2G/RFC5/POLR2K/RFC2/SSRP1/GTF…
HALLMARK_EPITHELIAL_MESENCHYMAL_TRANSITION	200	0.827845938738264	2.7985274660144	1e-10	2.38095238095238e-10	3.50877192982456e-11	4073	tags=70%, list=7%, signal=66%	SCG2/SLIT3/SFRP4/DCN/ECM2/SLIT2/PDGFRB/FSTL1/LRP1/CDH11/CXCL12/MMP2/SERPINE1/LUM/COL6A3/DAB2/LAMA2/FBN1/SPARC/THY1/ADAM12/COL3A1/HTRA1/SGCD/FAP/GEM/VCAN/COL1A2/ABI3BP/MFAP5/COL5A2/COL5A1/CDH6/CCN2/COL1A1/NID2/VEGFC/ACTA2/PCOLCE/LOX/PRRX1/EFEMP2/MXRA5/ITGA5/SNAI2/THBS2/POSTN/DPYSL3/CALD1/LOXL1/NT5E/FERMT2/NNMT/MYLK/NTM/FBLN1/ITGB3/BGN/TAGLN/WIPF1/ELN/LRRC15/THBS1/SPOCK1/INHBA/TIMP3/CCN1/COL6A2/COL…
HALLMARK_MTORC1_SIGNALING	200	-0.552832	-2.67929	1e-10	2.38095238095238e-10	3.50877192982456e-11	4804	tags=42%, list=8%, signal=39%	DHCR24/G6PD/IFRD1/SLC9A3R1/PGK1/SQLE/SERP1/TXNRD1/DHFR/RPA1/IDI1/TRIB3/PSPH/PPA1/MTHFD2L/EPRS1/DDIT3/ABCF2/HSPA5/PSMC2/TMEM97/IMMT/FKBP2/NFYC/HSPA9/HSP90B1/GAPDH/SLC2A1/SLC37A4/NFKBIB/PHGDH/NUP205/SLC7A5/PSME3/RRM2/DHCR7/PSMA3/SDF2L1/GPI/PNO1/EEF1E1/PSMA4/GMPS/MTHFD2/UCHL5/ARPC5L/CALR/GOT1/MCM2/EBP/CCT6A/PSMD12/RRP9/PPIA/DDX39A/PSMC4/PFKL/EIF2S2/BUB1/COPS5/PSMD14/SLC1A5/ATP5MC1/TPI1/PDAP1/RPN1/PS…
HALLMARK_UNFOLDED_PROTEIN_RESPONSE	112	-0.564121	-2.57972	1e-10	2.38095238095238e-10	3.50877192982456e-11	5746	tags=44%, list=10%, signal=39%	SDAD1/IARS1/CEBPB/NOP14/ALDH18A1/EIF4G1/SERP1/NFYA/CXXC1/ATF4/DDX10/PDIA6/PAIP1/TATDN2/ARFGAP1/HSPA5/YWHAZ/EIF4EBP1/NPM1/HSPA9/YIF1A/HSP90B1/NOLC1/EXOSC1/XPOT/CEBPG/IMP3/SLC7A5/GEMIN4/NHP2/EXOSC9/PREB/KHSRP/MTHFD2/FUS/SRPRB/CALR/RRP9/NOP56/EIF4A3/EXOSC2/H2AX/BANF1/POP4/LSM4/EXOSC5/EXOSC4/CKS1B/DKC1
HALLMARK_KRAS_SIGNALING_UP	200	0.740678185227494	2.50385747859807	1e-10	2.38095238095238e-10	3.50877192982456e-11	6487	tags=59%, list=11%, signal=52%	ADGRA2/AKAP12/CFH/SPON1/ADGRL4/PECAM1/GNG11/SPARCL1/F13A1/ITGBL1/NRP1/PRRX1/TFPI/CCND2/PLVAP/GFPT2/ETV1/INHBA/IGF2/CPE/TSPAN7/FLT4/ETS1/TMEM100/ABCB1/SCG5/MAFB/PRDM1/NGF/ENG/ALDH1A2/IL33/RELN/GYPC/IGFBP3/LY96/DUSP6/EMP1/BMP2/SNAP25/PLAU/RGS16/HBEGF/CMKLR1/HSD11B1/GPNMB/ANKH/FGF9/SPRY2/ALDH1A3/IL7R/DOCK2/PRKG2/MMP11/PLAT/RBP4/TNFRSF1B/CIDEA/SATB1/LIF/C3AR1/IRF8/VWA5A/MMD/HDAC9/IL10RA/EPB41L3/IKZF1…
HALLMARK_UV_RESPONSE_DN	144	0.742076127336423	2.46005419827088	1e-10	2.38095238095238e-10	3.50877192982456e-11	8244	tags=58%, list=15%, signal=49%	TGFBR2/PDGFRB/CAV1/SERPINE1/DAB2/DLC1/COL3A1/COL1A2/COL5A2/NRP1/COL1A1/PLPP3/HAS2/SYNE1/SNAI2/TFPI/PTPRM/ITGB3/FYN/CCN1/AKT3/FBLN5/PPARG/F3/RGS4/DUSP1/CELF2/ATXN1/EFEMP1/MGLL/MMP16/NR3C1/GRK5/LPAR1/LAMC1/MAP1B/PTGFR/PMP22/RUNX1/ACVR2A/PTPN21/COL11A1/AMPH/PRKCA/ADGRL2/MAGI2/TGFBR3/PRDM2/PIK3CD/ID1/PTEN/IRS1/GJA1/ADD3/ATP2B4/SDC2/SCHIP1/RND3/BDNF/INPP4B/TJP1/ATP2B1/LTBP1/IGFBP5/FHL2/SMAD7/NFKB1/KCN…
HALLMARK_INFLAMMATORY_RESPONSE	199	0.719995958036057	2.43465065458601	1e-10	2.38095238095238e-10	3.50877192982456e-11	9856	tags=63%, list=17%, signal=53%	SERPINE1/AXL/HAS2/ITGA5/CALCRL/PDPN/PTGIR/ITGB3/PCDH7/PTPRE/INHBA/TNFAIP6/APLNR/F3/SCARF1/NLRP3/HRH1/PTGER2/PTGER4/STAB1/IL1R1/LPAR1/FPR1/SELE/RGS16/IL6/EMP3/ACVR2A/HBEGF/CMKLR1/SLC4A4/MMP14/GPR183/KLF6/C5AR1/IL7R/TNFRSF1B/TIMP1/LIF/C3AR1/IL18R1/CCL2/BEST1/OSMR/KCNJ2/CD69/IL4R/IL10RA/CDKN1A/MSR1/PIK3R5/PTAFR/LCP2/ABCA1/KCNA3/SCN1B/CD40/VIP/CCRL2/RGS1/IL10/TACR1/GPC3/SGMS2/BTG2/P2RX7/BDKRB1/ADGRE1…
HALLMARK_ANGIOGENESIS	36	0.846058767230084	2.39126460880337	1e-10	2.38095238095238e-10	3.50877192982456e-11	4325	tags=58%, list=8%, signal=54%	FSTL1/LUM/COL3A1/VCAN/COL5A2/NRP1/THBD/POSTN/CCND2/KCNJ8/SLCO2A1/MSX1/PDGFA/ITGAV/LPL/FGFR1/JAG1/TIMP1/OLR1/VTN/S100A4
HALLMARK_TNFA_SIGNALING_VIA_NFKB	199	0.700523844073827	2.36880612521722	1e-10	2.38095238095238e-10	3.50877192982456e-11	9294	tags=60%, list=16%, signal=51%	SERPINE1/GEM/PLPP3/GFPT2/PTPRE/SLC2A3/INHBA/MSC/TNFAIP6/CCN1/EGR2/F3/FOS/DUSP1/KLF2/SGK1/ZFP36/EGR1/PTGER4/ACKR3/ETS2/TNC/FOSB/BMP2/KLF9/PLAU/IL6/HBEGF/EGR3/JAG1/GPR183/DNAJB4/KLF6/IL7R/SERPINB8/NR4A3/LIF/PMEPA1/GADD45B/CCL2/SPSB1/KLF10/NR4A2/GADD45A/CD69/CDKN1A/JUNB/SOCS3/DENND5A/ABCA1/TSC22D1/PER1/TNFAIP3/TNFAIP8/PTGS2/CCRL2/KLF4/G0S2/BTG2/NR4A1/FOSL2/IRS2/PLEK/CSF1/PHLDA1/TIPARP/OLR1/MAP3K8/F2…
HALLMARK_MYOGENESIS	198	0.699985678635012	2.36545513273205	1e-10	2.38095238095238e-10	3.50877192982456e-11	8918	tags=57%, list=16%, signal=48%	FHL1/IGFBP7/COL15A1/COL6A3/LAMA2/SPARC/ADAM12/COL3A1/IGF1/SGCD/MYH1/MEF2C/COL1A1/MYH11/MYH2/MYH4/AEBP1/MYLK/MYH8/TAGLN/GJA5/CDH13/COL6A2/FST/APLNR/COX7A1/TGFB1/MYOM1/CD36/PTGIS/CASQ2/ITGA7/SGCA/PYGM/SSPN/TNNT3/GPX3/IGFBP3/GSN/PDLIM7/MYL3/NCAM1/ITGB5/BDKRB2/COL4A2/ITGB1/HBEGF/SORBS1/LSP1/MEF2A/PKIA/MYH9/CKMT2/SGCG/LDB3/HRC/GADD45B/MYL4/FGF2/ACTC1/CDKN1A/GNAO1/DMD/DENND2B/SOD3/SPTAN1/ANKRD2/MYOM2/D…
HALLMARK_COAGULATION	138	0.69000662007218	2.28789740333054	1e-10	2.38095238095238e-10	3.50877192982456e-11	5478	tags=44%, list=10%, signal=40%	CFH/LRP1/MMP2/SERPINE1/PECAM1/FBN1/SPARC/VWF/CTSK/HTRA1/A2M/THBD/PROS1/F10/ITGB3/DPP4/CFI/THBS1/FYN/TIMP3/C1S/SERPING1/FN1/PRSS23/KLF7/F3/BMP1/C1R/F2RL2/COMP/MMP3/GSN/DUSP6/ANXA1/PLAU/MMP14/C3/MMP11/PLAT/CTSO/TIMP1/LEFTY2/P2RY1/GNG12/CAPN5/PDGFB/PLEK/CFD/MMP10/DCT/OLR1/F8/RAPGEF3/CTSB/ISCU/CPQ/CSRP1/ITGA2/MASP2/ACOX2/MMP8
HALLMARK_APICAL_JUNCTION	198	0.656443883903671	2.21831474832238	1e-10	2.38095238095238e-10	3.50877192982456e-11	7611	tags=51%, list=13%, signal=44%	SLIT2/JAM3/CDH11/LAYN/MMP2/PECAM1/CD34/ADAM23/FBN1/FLNC/THY1/VWF/VCAN/NEGR1/CDH6/NEXN/CNTN1/NRXN2/CADM3/NECTIN3/AKT3/ADAMTS5/CLDN11/COL16A1/PARVA/BMP1/CLDN5/VCL/CERCAM/CNN2/EPB41L2/MYL9/ITGB1/VCAM1/COL17A1/GNAI2/ICAM2/CD209/NLGN3/MAPK11/TRO/ACTN1/MYH9/CLDN18/CD99/TGFBI/LIMA1/CDH8/SKAP2/TNFRSF11B/NLGN2/ACTC1/PTPRC/MSN/ZYX/ACTG2/CLDN19/PTEN/IRS1/ITGA9/FYB1/SIRPA/ARHGEF6/ARPC2/CLDN14/PKD1/ADRA1B/ITG…
HALLMARK_ALLOGRAFT_REJECTION	200	0.637000867791192	2.15337702460152	1e-10	2.38095238095238e-10	3.50877192982456e-11	9457	tags=58%, list=17%, signal=49%	THY1/F2R/CCND2/INHBA/IL16/ETS1/TGFB1/NLRP3/ST8SIA4/STAB1/CCL11/IL6/ACVR2A/LY86/CD1D/CD28/FAS/SOCS5/TIMP1/LIF/BCAT1/CCL2/IRF8/HDAC9/HCLS1/IL4R/PTPRC/FGR/FLNA/LCP2/HLA-DOA/CRTAM/SRGN/CD40/GPR65/IL11/CD4/IL10/TGFB2/CCL19/PRKCB/FYB1/CCR2/STAT4/APBB1/TLR3/NCF4/CSF1/ITK/IGSF6/CD40LG/CCL22/WAS/NOS2/CD86/HLA-DMB/ELANE/FCGR2B/KLRD1/CFP/HLA-DRA/CCR1/EIF4G3/TRAT1/KRT1/JAK2/EGFR/CCR5/IL2/LYN/GALNT1/CD3G/SPI1…
HALLMARK_IL2_STAT5_SIGNALING	198	0.629891297723587	2.12858583931174	1e-10	2.38095238095238e-10	3.50877192982456e-11	7874	tags=50%, list=14%, signal=43%	SYT11/SHE/NRP1/PLPP1/PTH1R/ITIH5/NT5E/CCND2/COL6A1/SELP/SLC2A3/IL1RL1/ABCB1/SCN9A/PENK/PTGER2/RORA/F2RL2/SPRY4/HOPX/MYO1E/EMP1/ITGAV/BMP2/ADAM19/IL3RA/RGS16/TLR7/BMPR2/FGL2/TNFSF11/LRRC8C/TGM2/GUCY1B1/MAP6/CCR4/KLF6/SNX9/ECM1/AHNAK/BATF3/WLS/GABARAPL1/TNFRSF1B/LIF/IL18R1/GADD45B/IRF8/IL4R/IL10RA/PLAGL1/DENND5A/GPR65/IKZF4/IL10/SOCS2/CST7/PIM1/TWSG1/TNFRSF8/SELL/PRKCH/CSF1/PHLDA1/ARL4A/CDKN1C/CD86…
HALLMARK_COMPLEMENT	200	0.619010067938711	2.09255925022255	1e-10	2.38095238095238e-10	3.50877192982456e-11	8907	tags=46%, list=16%, signal=39%	CFH/LRP1/ZEB1/SERPINE1/ZFPM2/GNG2/TIMP2/NOTCH4/F10/DPP4/FYN/CDH13/C1S/SERPING1/SH2B3/FN1/F3/C1R/CD36/DOCK10/DUSP6/PIK3CG/COL4A2/IL6/MMP14/C3/GNAI2/CR1/PLAT/CTSO/TIMP1/HPCAL4/CASP10/DOCK4/KCNIP2/LIPA/PIK3R5/LCP2/CBLB/TNFAIP3/PDGFB/GZMK/PIM1/MMP13/PLA2G4A/PLEK/CPM/CD40LG/WAS/OLR1/FCN1/F8/CTSB/CPQ/GNGT2/CSRP1/JAK2/ITGAM/LYN/ANXA5/PRCP/F5/KLK1/DGKG/CDA/CASP4/GZMA/MMP8/DYRK2/CD55/PCSK9/DOCK9/DUSP5/FCE…
HALLMARK_HYPOXIA	199	0.593146266527918	2.00571118483296	1e-10	2.38095238095238e-10	3.50877192982456e-11	8021	tags=44%, list=14%, signal=38%	DCN/AKAP12/CAV1/SERPINE1/CAVIN1/COL5A1/CCN2/SRPX/LOX/BGN/CCN5/SLC2A3/CCN1/ETS1/KLF7/SLC6A6/F3/TGFB3/FOS/DUSP1/ZFP36/RORA/ACKR3/PYGM/PGF/NR3C1/IGFBP3/TPST2/IDS/IL6/HAS1/TGM2/KLF6/PRKCA/MYH9/PCK1/TGFBI/CDKN1A/PPARGC1A/GBE1/TNFAIP3/PDGFB/GCK/GPC3/DPYSL4/PIM1/PAM/FOSL2/IRS2/SDC2/TIPARP/LXN/PPP1R3C/CDKN1C/MAP3K1/IGFBP1/ATF3/CHST3/BNIP3L/SDC3/TKTL1/S100A4/EGFR/GPC1/JUN/PPP1R15A/ANGPTL4/NDST1/CAVIN3/AMP…
HALLMARK_IL6_JAK_STAT3_SIGNALING	87	0.66785767535547	2.14593179016367	2.61527496163114e-10	5.94380673097987e-10	8.75929412986507e-11	8726	tags=55%, list=15%, signal=47%	ACVRL1/A2M/ITGB3/LEPR/ITGA4/TGFB1/CD36/IL1R1/PDGFC/IL3RA/IL6/CSF2RB/FAS/TNFRSF1B/IL18R1/OSMR/IL4R/PIK3R5/SOCS3/PLA2G2A/CRLF2/PIM1/IL13RA1/CSF1/MAP3K8/CSF2RA/CCR1/JUN/CBL/EBI3/IL15RA/IFNGR1/TNFRSF1A/IL9R/TLR2/IL7/IL6ST/IFNAR1/HMOX1/IL2RA/STAM2/IL17RA/CNTFR/CD44/IL12RB1/IL1B/CD14/STAT3
HALLMARK_INTERFERON_GAMMA_RESPONSE	199	0.543967576780555	1.83941451629097	5.14752041547187e-09	1.11902617727649e-08	1.64909120861799e-09	12208	tags=47%, list=21%, signal=37%	CFH/LATS2/SELP/TNFAIP6/C1S/SERPING1/P2RY14/C1R/ST8SIA4/SSPN/FPR1/IL6/VCAM1/CMKLR1/ARID5B/FGL2/BANK1/CSF2RB/FAS/TXNIP/NOD1/CCL2/IRF8/CD69/IL4R/IL10RA/CDKN1A/SOCS3/MARCHF1/LCP2/ST3GAL5/CD40/TNFAIP3/PTGS2/PIM1/STAT4/VAMP5/PLA2G4A/IFITM2/ARL4A/CD86/JAK2/EIF4E3/IL2RB/PELI1/NFKB1/EPSTI1/HLA-DQA1/IL15RA/HLA-DRB1/ICAM1/SAMHD1/CASP4/GZMA/CD74/IL18BP/IL7/B2M/CIITA/IRF4/FCGR1A/KLRK1/PDE4B/HLA-DMA/UPP1/PML/I…
HALLMARK_KRAS_SIGNALING_DN	200	0.532556995463847	1.80030523710147	1.7880179719191e-08	3.72503744149812e-08	5.48952886115513e-09	13358	tags=50%, list=24%, signal=38%	SYNPO/SHOX2/FGF16/SLC16A7/ITIH3/COPZ2/SGK1/NRIP2/HTR1B/PTGFR/KCND1/ABCG4/ARPP21/ZBTB16/TENM2/EPHA5/PRKN/NTF3/NUDT11/RYR2/NR4A2/ACTC1/KCNMB1/SNCB/GDNF/TGFB2/BTG2/SELENOP/TFAP2B/CD40LG/WNT16/ABCB11/OXT/TSHB/MTHFR/EDN1/PAX3/KRT1/SSTR4/CCNA1/ENTPD7/CCR8/CAMK1D/TG/DCC/EDN2/MAST3/CHST2/SLC6A3/SLC12A3/ADRA2C/KLHDC8A/SKIL/LFNG/EDAR/P2RX6/CNTFR/TCL1A/SLC29A3/HTR1D/CD80/NOS1/THRB/IL12B/AKR1B10/SIDT1/KLK7/K…
HALLMARK_APOPTOSIS	161	0.560462243010647	1.86884563988045	2.09562934081315e-08	4.1912586816263e-08	6.17659174134402e-09	9790	tags=47%, list=17%, signal=39%	DCN/PDGFRB/CAV1/FEZ1/MMP2/LUM/HGF/F2R/PLPPR4/TIMP2/AVPR1A/CCND2/BGN/IGFBP6/TIMP3/DPYD/GPX3/GSN/EMP1/BMP2/ANXA1/IL6/EGR3/ANKH/FAS/NEDD9/TXNIP/LEF1/PLAT/TIMP1/SATB1/NEFH/GADD45B/GADD45A/CD69/CDKN1A/TGFBR3/TGFB2/SPTAN1/BTG2/RNASEL/ATF3/ADD1/BNIP3L/JUN/PEA15/PLCB2/SMAD7/CCNA1/ROCK1/CASP4/IFNGR1/SLC20A1/BIRC3/CD2/CYLD/HMOX1/SC5D/RETSAT/PRF1/CD44/LGALS3/SAT1/CASP1/MCL1/CTNNB1/IGF2R/IL1B/CD14/CFLAR/EREG…
HALLMARK_TGF_BETA_SIGNALING	54	0.683566069090255	2.0636689549008	3.47699079530568e-07	6.44176502248064e-07	9.49312740155042e-08	9404	tags=63%, list=17%, signal=53%	LTBP2/SERPINE1/ID3/THBS1/ENG/TGFB1/ACVR1/BMP2/RAB31/BMPR2/NOG/PMEPA1/LEFTY2/KLF10/JUNB/ID1/SKI/TGFBR1/SPTBN1/CDKN1C/WWTR1/TJP1/APC/SMAD7/SMAD1/PPP1R15A/SLC20A1/SKIL/SMAD3/HIPK2/RHOA/CTNNB1/BCAR3/XIAP
HALLMARK_GLYCOLYSIS	199	-0.366618	-1.78491	3.47855311213955e-07	6.44176502248064e-07	9.49312740155042e-08	6999	tags=35%, list=12%, signal=31%	COPB2/B4GALT2/GCLC/DSC2/GFPT1/LDHC/ALDOA/ENO1/SLC25A13/RPE/BIK/MIF/SPAG4/PGLS/G6PD/ALDH9A1/MIOX/PGK1/CASP6/EFNA3/PPFIA4/GFUS/ANKZF1/GALE/MED24/GMPPA/QSOX1/LCT/PYGB/SOX9/HSPA5/SRD5A3/CLN6/GYS1/ALDH7A1/ABCB6/SLC37A4/B3GAT3/NANP/SDHC/NOL3/FKBP4/CLDN3/MDH1/SAP30/GALK1/GOT2/STMN1/GOT1/ELF3/HMMR/TXN/BPNT1/PPIA/PSMC4/POLR3K/NASP/TPI1/CENPA/NDUFV3/KIF20A/DEPDC1/NSDHL/HAX1/MDH2/SLC25A10/AURKA/TALDO1/CDK1/…
HALLMARK_HEDGEHOG_SIGNALING	36	0.740373108400299	2.09255914600778	3.63541483633879e-07	6.49181220774784e-07	9.56688114825998e-08	7516	tags=58%, list=13%, signal=51%	SCG2/THY1/NRP1/GLI1/NRP2/CRMP1/ETS2/DPYSL2/HEY1/MYH9/NKX6-1/UNC5C/RTN1/RASA1/L1CAM/CDK6/NRCAM/HEY2/CNTFR/ACHE/PML
HALLMARK_MITOTIC_SPINDLE	199	-0.330447	-1.6088	1.28224012369798e-05	2.21075883396204e-05	3.25796038689142e-06	5702	tags=32%, list=10%, signal=29%	CTTN/CSNK1D/KATNA1/ARFIP2/KPTN/MARK4/RHOT2/TBCD/UXT/SMC4/SEPTIN9/NUSAP1/PCNT/ATG4B/NET1/MAPRE1/MAP3K11/STAU1/DYNLL2/KATNB1/TUBD1/ARL8A/KIF20B/ECT2/CEP250/SASS6/GEMIN4/CKAP5/YWHAE/ANLN/LRPPRC/INCENP/PIF1/PRC1/CENPF/CEP72/TOP2A/CENPE/FBXO5/KIF15/KIF23/CDC42EP4/KNTC1/DLGAP5/BUB1/LMNB1/CEP131/KIF11/KIF22/RACGAP1/TTK/NEK2/KIF2C/CCNB2/NDC80/ESPL1/KIF4A/TPX2/PLK1/AURKA/SAC3D1/BIRC5/CDK1
HALLMARK_XENOBIOTIC_METABOLISM	199	0.486799737876052	1.64610271383339	1.43898366207179e-05	2.39830610345299e-05	3.53434583666756e-06	7605	tags=33%, list=13%, signal=28%	SERPINE1/IGF1/PROS1/AOX1/F10/CDO1/FBLN1/ENPEP/PDK4/TPST1/FMO3/CES1/SLC6A6/FMO1/CD36/SLC12A4/ETS2/IL1R1/ATOH8/MAN1A1/HSD11B1/ADH1C/FAS/GCKR/IGFBP4/GABARAPL1/SLC46A3/RBP4/BCAT1/IRF8/PTGDS/ABCD2/ABCC3/MAOA/TGFB2/CYP26A1/TYR/ABHD6/PINK1/VNN1/TMEM176B/IGFBP1/AKR1C3/AKR1C2/TAT/VTN/CRP/CYP2S1/CDA/TNFRSF1A/ACOX2/CYFIP2/CYP1A1/GAD1/CROT/UGDH/HMOX1/EPHA2/PDLIM5/CAT/RETSAT/UPP1/ELOVL5/LCAT/PAPSS2
HALLMARK_PANCREAS_BETA_CELLS	40	0.657021175949314	1.88355958560279	3.94204835515727e-05	6.35814250831817e-05	9.36989422278468e-06	7036	tags=50%, list=12%, signal=44%	FOXO1/DPP4/AKT3/MAFB/PCSK1/LMO2/PAK3/NKX6-1/STXBP1/GCK/NEUROG3/CHGA/VDR/PCSK2/ISL1/G6PC2/ABCC8/SCGN/SST/INSM1
HALLMARK_P53_PATHWAY	199	0.467866962617281	1.58208194654655	9.84157555012135e-05	0.000153774617970646	2.26615226483057e-05	8888	tags=37%, list=16%, signal=31%	F2R/CCND2/ZMAT3/PTPRE/CDH13/FOS/TGFB1/PLK3/ZNF365/IRAG2/PDGFA/BMP2/RGS16/HBEGF/ZBTB16/PROCR/FAS/SESN1/TXNIP/LIF/VWA5A/RRAD/GADD45A/CDKN1A/ZFP36L1/TSC22D1/NHLH2/TP63/KLF4/DGKA/BTG2/RB1/CLCA2/STOM/CDKN2B/XPC/ATF3/TSPYL2/ISCU/RPS27L/S100A4/JUN/KIF13B/TCN2/PPP1R15A/VDR/NOTCH1/TNFSF9/PTPN14/CYFIP2/FUCA1/PHLDA3/MXD4/ALOX15B/HMOX1/EPHA2/SPHK1/RETSAT/TCHH/UPP1/GPX2/ERCC5/SAT1/ABHD4/RNF19B/PITPNC1/CGRRF1/…
HALLMARK_ANDROGEN_RESPONSE	100	0.531692089217078	1.72242	0.000125544804247935	0.00019021940037566	2.80323326869393e-05	8254	tags=42%, list=15%, signal=36%	AKAP12/PLPP1/MAF/SGK1/ITGAV/PTPN21/ARID5B/ADAMTS1/ANKH/CDC14B/ALDH1A3/ACTN1/RPS6KA3/PMEPA1/STEAP4/TSC22D1/KLK2/TNFAIP8/HPGD/ELL2/SELENOP/MERTK/ABHD2/INPP4B/DNAJB9/LIFR/HERC3/PIAS1/CDK6/GUCY1A1/SEC24D/ABCC4/B2M/KLK3/SLC26A2/IQGAP2/PDLIM5/ELOVL5/MAK/SAT1/SLC38A2/UBE2J1
HALLMARK_APICAL_SURFACE	44	0.6249237409775	1.82632139140648	0.000234916672081204	0.000345465694237065	5.09107338875675e-05	9838	tags=48%, list=17%, signal=39%	THY1/SRPX/MDGA1/GAS1/SULF2/AFAP1L2/SLC2A4/NTNG1/DCBLD2/LYN/IL2RB/MAL/ADAM10/SLC22A12/PCSK9/CD160/PLAUR/PKHD1/B4GALT1/IL2RG/CX3CL1
HALLMARK_PEROXISOME	104	-0.34222	-1.56951	0.00150827554254757	0.00215467934649653	0.00031753169316791	6534	tags=38%, list=12%, signal=33%	ECH1/SLC25A4/SIAH1/ERCC3/PEX14/CRABP2/ABCD1/DHCR24/NR1I2/PEX5/ALDH9A1/CDK7/PEX6/FABP6/PEX11B/IDI1/TSPO/PEX2/GNPAT/SLC25A17/SLC35B2/CNBP/FDPS/PABPC1/CLN6/PRDX5/IDH2/PEX13/HSD11B2/CTPS1/HRAS/ABCB9/SLC25A19/TOP2A/ACOT8/MSH2/PRDX1/NUDT19/SOD1
HALLMARK_ESTROGEN_RESPONSE_EARLY	200	0.419980023445809	1.41973956238984	0.00383186735129215	0.00532203798790576	0.000784300335059797	9772	tags=36%, list=17%, signal=29%	CXCL12/DLC1/RPS6KA2/OLFML3/CCN5/PRSS23/FOS/RAB31/NBL1/EGR3/CYP26B1/TGM2/IGFBP4/FCMR/KLF10/PDLIM3/MYOF/MPPED2/OLFM1/KLF4/PGR/GJA1/ADD3/CALCR/TIPARP/SVIL/SLC7A2/SLC1A1/PODXL/MAST4/ABHD2/INPP5F/JAK2/ELF1/FHL2/AFF1/BCL11B/UGCG/NRIP1/TUBB2B/CALB2/AREG/DYNLT3/IL6ST/MED13L/SH3BP5/CBFA2T3/SLC26A2/HSPB8/MAPT/BHLHE40/BCL2/ELOVL5/CD44/PAPSS2/LRIG1/RHOBTB3/ELOVL2/SEC14L2/ADCY1/PDZK1/REEP1/WFS1/GAB2/NAV2/TFF1…
HALLMARK_WNT_BETA_CATENIN_SIGNALING	42	0.568365964206871	1.64669979146055	0.00443285598068113	0.00599034591983937	0.000882787819765802	10063	tags=50%, list=18%, signal=41%	NOTCH4/CCND2/JAG1/DLL1/HEY1/LEF1/FZD1/TCF7/AXIN2/NKD1/WNT1/WNT5B/NOTCH1/HEY2/MAML1/RBPJ/NUMB/GNAI1/CTNNB1/PTCH1/FZD8
HALLMARK_REACTIVE_OXYGEN_SPECIES_PATHWAY	49	-0.416468	-1.64153	0.00557084338005238	0.00733005707901629	0.0010802189379603	6774	tags=45%, list=12%, signal=40%	GCLC/TXNRD2/ATOX1/STK25/NQO1/G6PD/NDUFA6/TXNRD1/ERCC2/MGST1/HMOX2/PRDX4/NDUFS2/GLRX2/NDUFB4/PRDX2/SCAF4/LAMTOR5/TXN/PRDX1/PRDX6/SOD1
HALLMARK_SPERMATOGENESIS	134	-0.302178	-1.41208	0.00581824853110712	0.00745929298859888	0.00109926422989878	3466	tags=22%, list=6%, signal=21%	DMC1/MAP7/PHKG2/CNIH2/DMRT1/TOPBP1/PEBP1/COIL/YBX2/CLPB/PGS1/PARP2/STRBP/RPL39L/CDKN3/VDAC3/DBF4/BUB1/EZH2/ACRV1/TTK/NEK2/NCAPH/KIF2C/CCNB2/RFC4/PSMG1/AURKA/TALDO1/CDK1
HALLMARK_PI3K_AKT_MTOR_SIGNALING	105	-0.314417	-1.43565	0.00740500806811274	0.00925626008514092	0.00136408043359971	4399	tags=25%, list=8%, signal=23%	PRKAG1/PIN1/ARPC3/GNGT1/RPTOR/TRIB3/DDIT3/UBE2N/AKT1S1/SFN/HSP90B1/SLC2A1/PFN1/NFKBIB/CFL1/CDK4/PAK4/HRAS/CALR/TRAF2/CDK2/PPP1CA/CSNK2B/ARF1/CDK1/E2F1
HALLMARK_BILE_ACID_METABOLISM	112	0.462118612115227	1.51282142585747	0.00787912618166933	0.0096086904654504	0.0014160175422769	10471	tags=35%, list=18%, signal=28%	ABCA6/HSD17B11/ABCA8/ABCA9/CH25H/ALDH1A1/BMP6/DIO2/ATXN1/SULT1B1/ABCG4/LIPE/NEDD4/CYP46A1/ABCD2/ABCA1/RXRG/CYP7B1/PNPLA8/CYP7A1/NR3C2/HSD17B6/SOAT2/PIPOX/ACSL5/CROT/CAT/RETSAT/AGXT/LCK/SLC23A2/BCAR3/AMACR/EFHC1/ACSL1/AR/CYP8B1/HSD17B4/PEX12
HALLMARK_NOTCH_SIGNALING	32	0.55305653906273	1.5298221834763	0.0186351408288184	0.022184691462879	0.00326932295242427	9418	tags=53%, list=17%, signal=44%	HEYL/WNT2/JAG1/DLL1/PRKCA/FZD1/WNT5A/DTX1/MAML2/NOTCH3/NOTCH1/FZD7/LFNG/NOTCH2/DTX4/ST3GAL6/FBXW11
HALLMARK_HEME_METABOLISM	199	0.393691762196202	1.33126012144655	0.0268201412455256	0.0311862107506111	0.00459586263693217	7191	tags=26%, list=13%, signal=22%	TNS1/TAL1/GYPE/SNCA/ABCG2/LMO2/ACKR1/CLIC2/GYPC/NR3C1/C3/SPTA1/HBB/ADD2/CAST/AGPAT4/EPB42/MYL4/ALDH1L1/SIDT2/BTG2/BACH1/TYR/SPTB/ANK1/KAT2B/ELL2/MPP1/PICALM/BMP2K/ADD1/BNIP3L/CTSB/ARHGEF12/SLC22A4/LRP10/ACSL6/KLF3/GATA1/TRAK2/SEC14L1/MARCHF2/SYNJ1/RBM5/SLC30A1/KDM7A/ERMAP/CAT/ALAD/MARCHF8/EZH1
