# Supplementary material for: Integrated bulk RNA and single-cell RNA sequencing to identify and validate exercise-related genes for predicting the prognosis of invasive ductal carcinoma
Source: Research Square preprint supplement (doi:10.21203/rs.3.rs-8444169/v1), 2026-01-16
Supplement: Supplementary file 8 [file 5d0361612451b54605f56ae7.xlsx]

## Sheet: Sheet1
Supplementary Table 9.
Cell name	Marker genes
NK cells	NKG7, GNLY, KLRD1, NCAM1
T cells	CD2, CD3D, CD3E, CD3G
B cells	MS4A1, CD19, CD79B
Epithelial cells	EPCAM, PIP, CDH1
Monocytes	S100A9, S100A8
Fibroblasts	SPARC, COL1A1, COL3A1, DCN, CALD1
Erythroid cells	HBA1, HBA2, HBB
Plasma cells	IGHG1, IGHG3, IGHG4, DERL3
Macrophages	C1QB, CD68, CD163
