# Supplementary material for: Integrated bulk RNA and single-cell RNA sequencing to identify and validate exercise-related genes for predicting the prognosis of invasive ductal carcinoma
Source: Research Square preprint supplement (doi:10.21203/rs.3.rs-8444169/v1), 2026-01-16
Supplement: Supplementary file 9 [file 5d6053cc96d905713c47cc09.xlsx]

## Sheet: Supplementary Table 3
GO enrichment analysis of DE-ERGs.
ONTOLOGY	ID	Description	pvalue	p.adjust	qvalue	geneID	Count	enrichment_factor
BP	GO:0006936	muscle contraction	8.73951809492197e-34	1.14021950222006e-30	9.0173683239224e-31	TPM3/COMP/SCN4B/CCDC78/ANK2/DMD/ABCC9/SCN2B/KCNE1/SCN3B/KCNJ3/SCN5A/TRDN/CAV3/GATA4/NUP155/KCNH2/ALDOA/SNTA1/CALM2/KCNJ2/KCNA5/KBTBD13/TTN/GAA/TPM2/CACNA1C/NPPA/NKX2-5/ACTA1/MYH6/TBX20/DSP/RYR1/SCN10A	35	17.1056721056721
BP	GO:0006941	striated muscle contraction	1.08026480551403e-33	1.14021950222006e-30	9.0173683239224e-31	SCN4B/CCDC78/ANK2/DMD/ABCC9/SCN2B/KCNE1/SCN3B/KCNJ3/SCN5A/CAV3/GATA4/NUP155/KCNH2/ALDOA/SNTA1/CALM2/KCNJ2/KCNA5/KBTBD13/TTN/GAA/CACNA1C/NPPA/NKX2-5/MYH6/DSP/RYR1/SCN10A	29	26.7463343108504
BP	GO:0003012	muscle system process	1.3102659890256e-32	9.21990500944347e-30	7.29151529331439e-30	TPM3/COMP/SCN4B/CCDC78/ANK2/DMD/ABCC9/SCN2B/KCNE1/SCN3B/KCNJ3/SCN5A/TRDN/CAV3/GATA4/GATA5/NUP155/KCNH2/ALDOA/SNTA1/CALM2/KCNJ2/KCNA5/KBTBD13/TTN/GAA/TPM2/CACNA1C/NPPA/NKX2-5/ACTA1/MYH6/MLIP/TBX20/DSP/RYR1/SCN10A	37	14.0424376508447
BP	GO:0060048	cardiac muscle contraction	1.08363882221162e-30	5.71890388422182e-28	4.52276624217796e-28	SCN4B/ANK2/DMD/ABCC9/SCN2B/KCNE1/SCN3B/KCNJ3/SCN5A/CAV3/GATA4/NUP155/KCNH2/SNTA1/CALM2/KCNJ2/KCNA5/TTN/GAA/CACNA1C/NPPA/NKX2-5/MYH6/DSP/SCN10A	25	30.8534990189666
BP	GO:0060047	heart contraction	3.4750554003942e-30	1.46716839004643e-27	1.16030270842636e-27	SCN4B/ANK2/DMD/ABCC9/SCN2B/KCNE1/SCN3B/KCNJ3/SCN5A/TRDN/CAV3/GATA4/NUP155/KCNH2/SNTA1/CALM2/KCNJ2/KCNA5/TTN/GAA/BVES/CACNA1C/NPPA/NKX2-5/TBX5/MYH6/DSP/ACTC1/SCN10A	29	20.4725028058361
BP	GO:0003015	heart process	1.45585226047811e-29	5.1221735364488e-27	4.05084506161101e-27	SCN4B/ANK2/DMD/ABCC9/SCN2B/KCNE1/SCN3B/KCNJ3/SCN5A/TRDN/CAV3/GATA4/NUP155/KCNH2/SNTA1/CALM2/KCNJ2/KCNA5/TTN/GAA/BVES/CACNA1C/NPPA/NKX2-5/TBX5/MYH6/DSP/ACTC1/SCN10A	29	19.5090909090909
BP	GO:0008016	regulation of heart contraction	4.12720965939017e-29	1.24464851299609e-26	9.84323987938769e-27	SCN4B/ANK2/DMD/ABCC9/SCN2B/KCNE1/SCN3B/KCNJ3/SCN5A/TRDN/CAV3/GATA4/NUP155/KCNH2/SNTA1/CALM2/KCNJ2/KCNA5/GAA/BVES/CACNA1C/NPPA/NKX2-5/TBX5/MYH6/DSP/SCN10A	27	22.2679195804196
BP	GO:1903522	regulation of blood circulation	1.59344593293241e-26	4.2047054555254e-24	3.32527006530369e-24	SCN4B/ANK2/DMD/ABCC9/SCN2B/KCNE1/SCN3B/KCNJ3/SCN5A/TRDN/CAV3/GATA4/NUP155/KCNH2/SNTA1/CALM2/KCNJ2/KCNA5/GAA/BVES/CACNA1C/NPPA/NKX2-5/TBX5/MYH6/DSP/SCN10A	27	17.9524312896406
BP	GO:0002027	regulation of heart rate	1.88418414435396e-25	4.41945858747911e-23	3.49510649467295e-23	SCN4B/ANK2/DMD/SCN2B/KCNE1/SCN3B/KCNJ3/SCN5A/CAV3/KCNH2/SNTA1/CALM2/KCNJ2/KCNA5/BVES/CACNA1C/NPPA/MYH6/DSP/SCN10A	20	33.6363636363636
BP	GO:0061337	cardiac conduction	3.328955414581e-24	7.02742488018049e-22	5.55760346055313e-22	SCN4B/ANK2/ABCC9/SCN2B/KCNE1/SCN3B/KCNJ3/SCN5A/TRDN/NUP155/KCNH2/CALM2/KCNJ2/KCNA5/CACNA1C/NKX2-5/TBX5/DSP/SCN10A	19	33.601686972821
BP	GO:0070252	actin-mediated cell contraction	1.68592930368277e-23	3.23545160006758e-21	2.55874055085252e-21	SCN4B/ANK2/ABCC9/SCN2B/KCNE1/SCN3B/KCNJ3/SCN5A/CAV3/GATA4/NUP155/KCNH2/SNTA1/KCNJ2/KCNA5/CACNA1C/MYH6/DSP/ACTC1	19	31.0415584415584
BP	GO:0086001	cardiac muscle cell action potential	8.22684161073289e-23	1.33591251078901e-20	1.05649965948359e-20	SCN4B/ANK2/DMD/SCN2B/KCNE1/SCN3B/KCNJ3/SCN5A/CAV3/NUP155/KCNH2/SNTA1/KCNJ2/KCNA5/CACNA1C/DSP/SCN10A	17	38.372009569378
BP	GO:0086003	cardiac muscle cell contraction	8.22684161073289e-23	1.33591251078901e-20	1.05649965948359e-20	SCN4B/ANK2/ABCC9/SCN2B/KCNE1/SCN3B/KCNJ3/SCN5A/CAV3/GATA4/NUP155/KCNH2/SNTA1/KCNJ2/KCNA5/CACNA1C/DSP	17	38.372009569378
BP	GO:0086002	cardiac muscle cell action potential involved in contraction	5.8935589032225e-22	8.88664488907336e-20	7.02795821091044e-20	SCN4B/ANK2/SCN2B/KCNE1/SCN3B/KCNJ3/SCN5A/CAV3/NUP155/KCNH2/SNTA1/KCNJ2/KCNA5/CACNA1C/DSP	15	48.5506003430532
BP	GO:0030048	actin filament-based movement	1.94085298834903e-21	2.73142710560319e-19	2.16013532598004e-19	SCN4B/ANK2/ABCC9/SCN2B/KCNE1/SCN3B/KCNJ3/SCN5A/CAV3/GATA4/NUP155/KCNH2/SNTA1/KCNJ2/KCNA5/CACNA1C/MYH6/DSP/ACTC1	19	24.5064935064935
BP	GO:0001508	action potential	1.2191554719079e-20	1.60852325074849e-18	1.27209248581969e-18	SCN4B/ANK2/DMD/ABCC9/SCN2B/KCNE1/NTRK2/SCN3B/KCNJ3/SCN5A/CAV3/NUP155/KCNH2/SNTA1/KCNJ2/KCNA5/CACNA1C/DSP/SCN10A	19	22.3244084682441
BP	GO:0086091	regulation of heart rate by cardiac conduction	1.98180111494287e-18	2.46093067861435e-16	1.94621459337424e-16	SCN4B/ANK2/SCN2B/KCNE1/SCN3B/KCNJ3/SCN5A/KCNH2/KCNJ2/KCNA5/CACNA1C/DSP	12	54.1722488038277
BP	GO:0099622	cardiac muscle cell membrane repolarization	2.84886251362584e-18	3.34108264792452e-16	2.64227833135121e-16	SCN4B/ANK2/SCN2B/KCNE1/KCNJ3/SCN5A/CAV3/KCNH2/SNTA1/KCNJ2/KCNA5/NPPA	12	52.7832167832168
BP	GO:0042391	regulation of membrane potential	4.64497443315373e-18	5.16081106757239e-16	4.08140135788467e-16	SCN4B/ANK2/DMD/ABCC9/SCN2B/KCNE1/NTRK2/SCN3B/KCNJ3/SCN5A/TRDN/CAV3/NUP155/KCNH2/SNTA1/KCNJ2/KCNA5/BVES/CACNA1C/NPPA/TBX5/DSP/GABRR1/SCN10A/PIEZO2	25	9.74690082644628
BP	GO:0086065	cell communication involved in cardiac conduction	1.09645721957746e-17	1.15731059526401e-15	9.15253236973607e-16	SCN4B/ANK2/SCN3B/KCNJ3/SCN5A/TRDN/NUP155/CALM2/KCNA5/CACNA1C/TBX5/DSP/SCN10A	13	38.4498432601881
BP	GO:0086005	ventricular cardiac muscle cell action potential	5.87184556350798e-17	5.90260284979303e-15	4.66804364096424e-15	ANK2/SCN2B/KCNE1/SCN3B/KCNJ3/SCN5A/CAV3/KCNH2/SNTA1/CACNA1C/DSP	11	53.9142857142857
BP	GO:0086009	membrane repolarization	2.32467743798101e-16	2.23063366889905e-14	1.76408536681238e-14	SCN4B/ANK2/SCN2B/KCNE1/KCNJ3/SCN5A/CAV3/KCNH2/SNTA1/KCNJ2/KCNA5/NPPA	12	38.1212121212121
BP	GO:0086010	membrane depolarization during action potential	3.58503096955097e-16	3.29043494640091e-14	2.60222385249787e-14	SCN4B/ANK2/SCN2B/SCN3B/SCN5A/CAV3/KCNH2/KCNJ2/CACNA1C/SCN10A	10	61.2662337662338
BP	GO:0086019	cell-cell signaling involved in cardiac conduction	3.47984017991489e-15	3.06080942491681e-13	2.42062566901097e-13	SCN4B/ANK2/SCN3B/KCNJ3/SCN5A/NUP155/KCNA5/CACNA1C/TBX5/SCN10A	10	50.4545454545455
BP	GO:0060306	regulation of membrane repolarization	1.23050826301329e-14	1.03904117728842e-12	8.21720465321717e-13	SCN4B/ANK2/KCNE1/SCN5A/CAV3/KCNH2/SNTA1/KCNJ2/KCNA5/NPPA	10	45.1435406698565
BP	GO:0006942	regulation of striated muscle contraction	1.76580878739167e-14	1.43370090391685e-12	1.13383511611465e-12	ANK2/DMD/SCN5A/CAV3/GATA4/CALM2/KCNJ2/KBTBD13/CACNA1C/NPPA/NKX2-5/DSP/SCN10A	13	22.5261707988981
BP	GO:0055117	regulation of cardiac muscle contraction	2.62232200771638e-14	2.05026731788492e-12	1.6214435494106e-12	ANK2/DMD/SCN5A/CAV3/GATA4/CALM2/KCNJ2/CACNA1C/NPPA/NKX2-5/DSP/SCN10A	12	26.3916083916084
BP	GO:0099623	regulation of cardiac muscle cell membrane repolarization	3.50665677998523e-14	2.55260429743063e-12	2.01871421163578e-12	SCN4B/ANK2/KCNE1/SCN5A/CAV3/KCNH2/SNTA1/KCNA5/NPPA	9	55.1396103896104
BP	GO:0099625	ventricular cardiac muscle cell membrane repolarization	3.50665677998523e-14	2.55260429743063e-12	2.01871421163578e-12	SCN4B/ANK2/SCN2B/KCNE1/KCNJ3/SCN5A/CAV3/KCNH2/SNTA1	9	55.1396103896104
BP	GO:0086012	membrane depolarization during cardiac muscle cell action potential	3.07613415147187e-13	2.16457306458571e-11	1.71184167166119e-11	SCN4B/ANK2/SCN2B/SCN3B/SCN5A/CAV3/KCNJ2/CACNA1C	8	62.3801652892562
BP	GO:0055001	muscle cell development	4.73866219462085e-13	3.22687609446601e-11	2.5519586555751e-11	COMP/ANK2/DMD/CAV3/GATA4/OBSCN/TTN/BVES/NKX2-5/ACTA1/TBX5/MYH6/ACTC1/RYR1/MYPN	15	13.1958041958042
BP	GO:0060537	muscle tissue development	6.98004117049866e-13	4.60464590966334e-11	3.64156095276674e-11	EGR1/DMD/EGR2/SCN5A/CAV3/GATA4/GATA5/SVIL/TTN/CITED2/BVES/NPPA/NKX2-5/ACTA1/TBX5/MYH6/TBX20/DSP/ACTC1/RYR1	20	7.92357757715725
BP	GO:0051899	membrane depolarization	1.18668596917727e-12	7.59119418464609e-11	6.00345756655549e-11	SCN4B/ANK2/SCN2B/SCN3B/SCN5A/CAV3/KCNH2/KCNJ2/CACNA1C/TBX5/SCN10A	11	23.5875
BP	GO:0010959	regulation of metal ion transport	1.56762304272883e-12	9.73309483294283e-11	7.69736887234652e-11	SCN4B/ANK2/DMD/SCN2B/KCNE1/SCN3B/SCN5A/TRDN/CAV3/ISCU/KCNH2/SNTA1/CALM2/KCNJ2/KCNA5/CACNA1C/NPPA/NKX2-5/IL16	19	8.18935587026039
BP	GO:0086014	atrial cardiac muscle cell action potential	8.9661652066213e-12	5.1155607435615e-10	4.0456153677671e-10	ANK2/SCN3B/KCNJ3/SCN5A/NUP155/KCNA5/CACNA1C	7	63.200956937799
BP	GO:0086026	atrial cardiac muscle cell to AV node cell signaling	8.9661652066213e-12	5.1155607435615e-10	4.0456153677671e-10	ANK2/SCN3B/KCNJ3/SCN5A/NUP155/KCNA5/CACNA1C	7	63.200956937799
BP	GO:0086066	atrial cardiac muscle cell to AV node cell communication	8.9661652066213e-12	5.1155607435615e-10	4.0456153677671e-10	ANK2/SCN3B/KCNJ3/SCN5A/NUP155/KCNA5/CACNA1C	7	63.200956937799
BP	GO:0090257	regulation of muscle system process	1.44387559884519e-11	8.02110891884787e-10	6.34345346196251e-10	ANK2/DMD/SCN5A/CAV3/GATA4/GATA5/CALM2/KCNJ2/KBTBD13/CACNA1C/NPPA/NKX2-5/MLIP/DSP/SCN10A	15	10.4177401545823
BP	GO:0034765	regulation of monoatomic ion transmembrane transport	1.55489619691655e-11	8.41637402997648e-10	6.65604687802872e-10	SCN4B/ANK2/DMD/SCN2B/KCNE1/SCN3B/KCNJ3/SCN5A/TRDN/CAV3/ISCU/KCNH2/SNTA1/CALM2/KCNJ2/KCNA5/CACNA1C/NPPA/SCN10A	19	7.17921505806968
BP	GO:0006937	regulation of muscle contraction	2.01686441623909e-11	1.06440019567018e-09	8.41775516882946e-10	ANK2/DMD/SCN5A/CAV3/GATA4/CALM2/KCNJ2/KBTBD13/CACNA1C/NPPA/NKX2-5/DSP/SCN10A	13	13.1181818181818
BP	GO:1904062	regulation of monoatomic cation transmembrane transport	4.21998325109692e-11	2.15102909355481e-09	1.70113049060207e-09	SCN4B/ANK2/DMD/SCN2B/KCNE1/SCN3B/SCN5A/TRDN/CAV3/ISCU/KCNH2/SNTA1/CALM2/KCNJ2/CACNA1C/NPPA	16	8.71341991341991
BP	GO:0060307	regulation of ventricular cardiac muscle cell membrane repolarization	4.27964101986272e-11	2.15102909355481e-09	1.70113049060207e-09	SCN4B/ANK2/KCNE1/SCN5A/CAV3/KCNH2/SNTA1	7	52.2094861660079
BP	GO:0048738	cardiac muscle tissue development	1.80578026843185e-10	8.86512127130149e-09	7.01093636654325e-09	SCN5A/CAV3/GATA4/GATA5/TTN/CITED2/BVES/NPPA/NKX2-5/TBX5/MYH6/TBX20/DSP/ACTC1	14	9.72322414427678
BP	GO:0003007	heart morphogenesis	4.33162036904604e-10	2.03201124423471e-08	1.60700582580281e-08	ABCC9/CAV3/GATA4/GATA5/TTN/CITED2/GAA/NKX2-5/TBX5/MYH6/TBX20/DSP/ACTC1/RYR1	14	9.09710743801653
BP	GO:0014706	striated muscle tissue development	4.33162036904604e-10	2.03201124423471e-08	1.60700582580281e-08	SCN5A/CAV3/GATA4/GATA5/TTN/CITED2/BVES/NPPA/NKX2-5/TBX5/MYH6/TBX20/DSP/ACTC1	14	9.09710743801653
BP	GO:0086004	regulation of cardiac muscle cell contraction	1.10835967939946e-09	5.08640713741795e-08	4.02255938564655e-08	ANK2/SCN5A/CAV3/GATA4/KCNJ2/CACNA1C/DSP	7	34.3090909090909
BP	GO:0007517	muscle organ development	2.1875719638192e-09	9.82545620345178e-08	7.77041239555936e-08	EGR1/DMD/EGR2/CAV3/SVIL/TTN/CITED2/BVES/NKX2-5/ACTA1/MYH6/TBX20/DSP/ACTC1/RYR1	15	7.26887519260401
BP	GO:1903115	regulation of actin filament-based movement	3.60068313754426e-09	1.58355043819915e-07	1.25234286318974e-07	ANK2/SCN5A/CAV3/GATA4/KCNJ2/CACNA1C/DSP	7	29.2882483370288
BP	GO:0043270	positive regulation of monoatomic ion transport	4.40934725535218e-09	1.89961878694866e-07	1.50230391986865e-07	SCN4B/ANK2/DMD/KCNE1/SCN3B/SCN5A/TRDN/KCNH2/CALM2/KCNJ2/NPPA/NKX2-5	12	9.61937128292268
BP	GO:0086013	membrane repolarization during cardiac muscle cell action potential	5.53333883620269e-09	2.33617565664477e-07	1.8475527145721e-07	SCN2B/KCNE1/KCNJ3/KCNH2/KCNJ2/KCNA5	6	41.1709090909091
BP	GO:0030239	myofibril assembly	8.08331602765374e-09	3.34585884987785e-07	2.64605556653433e-07	CAV3/OBSCN/TTN/NKX2-5/ACTA1/MYH6/ACTC1/MYPN	8	19.3290653008963
BP	GO:0055002	striated muscle cell development	1.01151008477337e-08	4.10634190183957e-07	3.24747974585134e-07	CAV3/OBSCN/TTN/NKX2-5/ACTA1/MYH6/ACTC1/MYPN	8	18.799501867995
BP	GO:0086069	bundle of His cell to Purkinje myocyte communication	1.76066293032852e-08	7.0127536715538e-07	5.54600080933672e-07	SCN5A/KCNA5/TBX5/DSP/SCN10A	5	57.1818181818182
BP	GO:0042692	muscle cell differentiation	2.10626870659324e-08	8.23395044373766e-07	6.51177810654363e-07	COMP/ANK2/DMD/CAV3/GATA4/OBSCN/TTN/BVES/NKX2-5/ACTA1/TBX5/MYH6/ACTC1/RYR1/MYPN	15	6.14124538945541
BP	GO:0086011	membrane repolarization during action potential	2.23606125530877e-08	8.58240965446695e-07	6.787355312765e-07	SCN2B/KCNE1/KCNJ3/KCNH2/KCNJ2/KCNA5	6	33.2023460410557
BP	GO:0002028	regulation of sodium ion transport	3.41808868806389e-08	1.28849736080408e-06	1.0190016276822e-06	SCN4B/DMD/SCN2B/SCN3B/SCN5A/CAV3/SNTA1/NKX2-5	8	16.1454545454545
BP	GO:0055013	cardiac muscle cell development	3.7505673565885e-08	1.38902591048391e-06	1.09850412327781e-06	CAV3/GATA4/TTN/BVES/NKX2-5/TBX5/MYH6/ACTC1	8	15.9577167019027
BP	GO:0016052	carbohydrate catabolic process	3.91584813402437e-08	1.42523369153887e-06	1.12713886398596e-06	PYGM/PHKG2/PGM1/PGK1/ALDOA/PYGL/LDHA/GAA/GIT1/ENO3	10	10.5242610150586
BP	GO:0050881	musculoskeletal movement	5.01308762549738e-08	1.79366575888559e-06	1.41851150295073e-06	COMP/CCDC78/DMD/CAV3/KCNJ2/KBTBD13/GAA	7	20.3528505392912
BP	GO:0003205	cardiac chamber development	5.21497801963987e-08	1.83480309990996e-06	1.45104476125418e-06	ANK2/SCN5A/CAV3/GATA4/CITED2/NKX2-5/TBX5/MYH6/TBX20/DSP	10	10.211038961039
BP	GO:0050879	multicellular organismal movement	5.64812207856474e-08	1.92309446900809e-06	1.52086954441488e-06	COMP/CCDC78/DMD/CAV3/KCNJ2/KBTBD13/GAA	7	20.0136363636364
BP	GO:1902305	regulation of sodium ion transmembrane transport	5.64812207856474e-08	1.92309446900809e-06	1.52086954441488e-06	SCN4B/DMD/SCN2B/SCN3B/SCN5A/CAV3/SNTA1	7	20.0136363636364
BP	GO:0014808	release of sequestered calcium ion into cytosol by sarcoplasmic reticulum	5.77712777327223e-08	1.93579630625043e-06	1.53091472822218e-06	ANK2/DMD/TRDN/CALM2/CACNA1C/RYR1	6	28.5909090909091
BP	GO:0010927	cellular component assembly involved in morphogenesis	5.97060182869467e-08	1.96936569693351e-06	1.55746291123516e-06	ANK2/CAV3/OBSCN/TTN/NKX2-5/ACTA1/MYH6/ACTC1/MYPN	9	12.0617897727273
BP	GO:0003161	cardiac conduction system development	6.86275042584993e-08	2.16072862865897e-06	1.70880131893247e-06	SCN5A/GATA4/BVES/NPPA/NKX2-5/TBX5	6	27.8181818181818
BP	GO:0003230	cardiac atrium development	6.86275042584993e-08	2.16072862865897e-06	1.70880131893247e-06	ANK2/GATA4/NKX2-5/TBX5/MYH6/TBX20	6	27.8181818181818
BP	GO:1903514	release of sequestered calcium ion into cytosol by endoplasmic reticulum	6.86275042584993e-08	2.16072862865897e-06	1.70880131893247e-06	ANK2/DMD/TRDN/CALM2/CACNA1C/RYR1	6	27.8181818181818
BP	GO:0055006	cardiac cell development	6.96018696109947e-08	2.16072862865897e-06	1.70880131893247e-06	CAV3/GATA4/TTN/BVES/NKX2-5/TBX5/MYH6/ACTC1	8	14.7565982404692
BP	GO:0060419	heart growth	9.68870038619321e-08	2.96418065438462e-06	2.34420729405071e-06	CAV3/DUSP6/GATA4/CITED2/NKX2-5/TBX5/MYH6/TBX20	8	14.1480787253983
BP	GO:0035725	sodium ion transmembrane transport	9.99381240193305e-08	3.01384828292581e-06	2.38348668713772e-06	SCN4B/DMD/SCN2B/SCN3B/SCN5A/CAV3/SNTA1/NPPA/SLC6A1/SCN10A	10	9.53030303030303
BP	GO:0098659	inorganic cation import across plasma membrane	1.07429515174016e-07	3.14977370183818e-06	2.49098261792383e-06	ABCC9/KCNJ3/SCN5A/ISCU/KCNH2/KCNJ2/CACNA1C/SLC6A1/SCN10A	9	11.2694094226941
BP	GO:0099587	inorganic ion import across plasma membrane	1.07429515174016e-07	3.14977370183818e-06	2.49098261792383e-06	ABCC9/KCNJ3/SCN5A/ISCU/KCNH2/KCNJ2/CACNA1C/SLC6A1/SCN10A	9	11.2694094226941
BP	GO:0070296	sarcoplasmic reticulum calcium ion transport	1.74933319535913e-07	5.05868818548373e-06	4.00063799255888e-06	ANK2/DMD/TRDN/CALM2/CACNA1C/RYR1	6	23.9365750528541
BP	GO:0060420	regulation of heart growth	1.84527871163969e-07	5.2640315679343e-06	4.16303276907617e-06	CAV3/DUSP6/CITED2/NKX2-5/TBX5/MYH6/TBX20	7	16.9129321382843
BP	GO:0003283	atrial septum development	1.90090376569367e-07	5.35041046583913e-06	4.23134508405638e-06	ANK2/GATA4/NKX2-5/TBX5/TBX20	5	37.2924901185771
BP	GO:0051146	striated muscle cell differentiation	2.19461101673294e-07	6.01931779134861e-06	4.76034706279334e-06	CAV3/GATA4/OBSCN/TTN/BVES/NKX2-5/ACTA1/TBX5/MYH6/ACTC1/RYR1/MYPN	12	6.74932935916542
BP	GO:0006814	sodium ion transport	2.19558251981925e-07	6.01931779134861e-06	4.76034706279334e-06	SCN4B/DMD/SCN2B/SCN3B/SCN5A/CAV3/SNTA1/NPPA/NKX2-5/SLC6A1/SCN10A	11	7.60887096774194
BP	GO:0003009	skeletal muscle contraction	2.64989553455229e-07	7.17170445312807e-06	5.67170623184877e-06	CCDC78/DMD/CAV3/KCNJ2/KBTBD13/GAA	6	22.3754940711462
BP	GO:0003254	regulation of membrane depolarization	3.02336177733949e-07	8.07888191387806e-06	6.38914294318512e-06	SCN2B/SCN3B/SCN5A/CAV3/TBX5/SCN10A	6	21.899419729207
BP	GO:0086016	AV node cell action potential	3.49543838758194e-07	8.89020534480179e-06	7.03077397933413e-06	SCN4B/SCN5A/CACNA1C/SCN10A	4	62.3801652892562
BP	GO:0086027	AV node cell to bundle of His cell signaling	3.49543838758194e-07	8.89020534480179e-06	7.03077397933413e-06	SCN4B/SCN5A/CACNA1C/SCN10A	4	62.3801652892562
BP	GO:0086070	SA node cell to atrial cardiac muscle cell communication	3.49543838758194e-07	8.89020534480179e-06	7.03077397933413e-06	ANK2/SCN3B/SCN5A/KCNA5	4	62.3801652892562
BP	GO:0099624	atrial cardiac muscle cell membrane repolarization	3.49543838758194e-07	8.89020534480179e-06	7.03077397933413e-06	KCNJ3/SCN5A/KCNA5/NPPA	4	62.3801652892562
BP	GO:0009612	response to mechanical stimulus	4.77394996667551e-07	1.19973909281572e-05	9.48807599893153e-06	DMD/CAV3/GATA4/KCNJ2/KCNA5/TTN/CITED2/NPPA/ACTA1/PIEZO2	10	8.05377720870679
BP	GO:0086067	AV node cell to bundle of His cell communication	5.21961419645102e-07	1.28647403618258e-05	1.0174014916281e-05	SCN4B/SCN5A/CACNA1C/SCN10A	4	57.1818181818182
BP	GO:0035051	cardiocyte differentiation	5.24096480870214e-07	1.28647403618258e-05	1.0174014916281e-05	CAV3/GATA4/TTN/CITED2/BVES/NKX2-5/TBX5/MYH6/ACTC1	9	9.35702479338843
BP	GO:0003209	cardiac atrium morphogenesis	6.52450928041114e-07	1.58313092999401e-05	1.25201109724526e-05	GATA4/NKX2-5/TBX5/MYH6/TBX20	5	29.576802507837
BP	GO:0003206	cardiac chamber morphogenesis	7.77818250769626e-07	1.84491497457829e-05	1.45904168624557e-05	CAV3/GATA4/CITED2/NKX2-5/TBX5/MYH6/TBX20/DSP	8	10.806012884753
BP	GO:0003231	cardiac ventricle development	7.77818250769626e-07	1.84491497457829e-05	1.45904168624557e-05	SCN5A/GATA4/CITED2/NKX2-5/TBX5/MYH6/TBX20/DSP	8	10.806012884753
BP	GO:0010880	regulation of release of sequestered calcium ion into cytosol by sarcoplasmic reticulum	9.24886086400018e-07	2.1693716982116e-05	1.71563664681922e-05	ANK2/DMD/TRDN/CALM2/CACNA1C	5	27.6686217008798
BP	GO:0035265	organ growth	9.44715848991042e-07	2.1915331398023e-05	1.73316291093093e-05	COMP/CAV3/DUSP6/GATA4/CITED2/NKX2-5/TBX5/MYH6/TBX20	9	8.72265023112481
BP	GO:0055007	cardiac muscle cell differentiation	9.84706688116779e-07	2.25947371588535e-05	1.78689337225768e-05	CAV3/GATA4/TTN/BVES/NKX2-5/TBX5/MYH6/ACTC1	8	10.4760582928522
BP	GO:0032412	regulation of monoatomic ion transmembrane transporter activity	1.00173916739584e-06	2.27384019609959e-05	1.79825503054873e-05	SCN4B/ANK2/DMD/SCN2B/KCNE1/SCN3B/TRDN/CAV3/CALM2/NPPA	10	7.42621015348288
BP	GO:0010765	positive regulation of sodium ion transport	1.09108890273107e-06	2.45030709964393e-05	1.93781298962092e-05	SCN4B/DMD/SCN3B/SCN5A/NKX2-5	5	26.8039772727273
BP	GO:0098900	regulation of action potential	1.19874944324054e-06	2.6637474470324e-05	2.10661120994958e-05	ANK2/SCN5A/CAV3/KCNJ2/CACNA1C/DSP	6	17.4453004622496
BP	GO:0022898	regulation of transmembrane transporter activity	1.36370708017644e-06	2.99873504817966e-05	2.37153446179807e-05	SCN4B/ANK2/DMD/SCN2B/KCNE1/SCN3B/TRDN/CAV3/CALM2/NPPA	10	7.17763408139977
BP	GO:0060413	atrial septum morphogenesis	1.42005135277744e-06	3.0904416553744e-05	2.44406016875205e-05	GATA4/NKX2-5/TBX5/TBX20	4	45.7454545454545
BP	GO:0003179	heart valve morphogenesis	1.46335936507399e-06	3.12035517138504e-05	2.46771712175157e-05	GATA4/GATA5/NPPA/NKX2-5/TBX5/TBX20	6	16.8733233979136
BP	GO:0055008	cardiac muscle tissue morphogenesis	1.46335936507399e-06	3.12035517138504e-05	2.46771712175157e-05	TTN/NKX2-5/MYH6/TBX20/DSP/ACTC1	6	16.8733233979136
BP	GO:1904064	positive regulation of cation transmembrane transport	1.71728996436708e-06	3.62519911477891e-05	2.86697040366967e-05	ANK2/DMD/KCNE1/TRDN/KCNH2/CALM2/KCNJ2/NPPA	8	9.73307543520309
BP	GO:0003300	cardiac muscle hypertrophy	1.80700967015689e-06	3.73980138598157e-05	2.95760303082439e-05	CAV3/GATA4/GATA5/TTN/NPPA/MYH6/MLIP	7	12.129476584022
BP	GO:0046620	regulation of organ growth	1.80700967015689e-06	3.73980138598157e-05	2.95760303082439e-05	CAV3/DUSP6/CITED2/NKX2-5/TBX5/MYH6/TBX20	7	12.129476584022
BP	GO:0098915	membrane repolarization during ventricular cardiac muscle cell action potential	1.88490481552678e-06	3.86313986949227e-05	3.05514464734336e-05	SCN2B/KCNE1/KCNJ3/KCNH2	4	42.8863636363636
BP	GO:0032970	regulation of actin filament-based process	2.17177135528631e-06	4.4005720577555e-05	3.48017017806489e-05	ANK2/SCN5A/CAV3/CSF3/GATA4/GRB2/SPTA1/SPTB/SVIL/KCNJ2/CACNA1C/DSP	12	5.43151834972415
BP	GO:0014897	striated muscle hypertrophy	2.20966668935141e-06	4.4005720577555e-05	3.48017017806489e-05	CAV3/GATA4/GATA5/TTN/NPPA/MYH6/MLIP	7	11.7727272727273
BP	GO:0043266	regulation of potassium ion transport	2.20966668935141e-06	4.4005720577555e-05	3.48017017806489e-05	ANK2/KCNE1/CAV3/KCNH2/KCNJ2/KCNA5/NPPA	7	11.7727272727273
BP	GO:1901381	positive regulation of potassium ion transmembrane transport	2.30763698766539e-06	4.55273054295479e-05	3.60050394730674e-05	ANK2/KCNE1/KCNH2/KCNJ2/NPPA	5	23.1818181818182
BP	GO:0014896	muscle hypertrophy	2.51772051181869e-06	4.9212111115271e-05	3.89191494322071e-05	CAV3/GATA4/GATA5/TTN/NPPA/MYH6/MLIP	7	11.5463286713287
BP	GO:0003180	aortic valve morphogenesis	2.64498945573194e-06	5.12254379912856e-05	4.05113788198055e-05	GATA4/GATA5/NPPA/NKX2-5/TBX20	5	22.5717703349282
BP	GO:0007015	actin filament organization	3.08185818142697e-06	5.91436601908393e-05	4.67734648396475e-05	TPM3/CAV3/CSF3/GRB2/SPTA1/SPTB/ALDOA/SVIL/KBTBD13/TTN/TPM2/ACTA1/ACTC1	13	4.80623040752351
BP	GO:0005980	glycogen catabolic process	3.14075166958149e-06	5.91975604864869e-05	4.68160916161301e-05	PYGM/PHKG2/PYGL/GAA	4	38.1212121212121
BP	GO:0014819	regulation of skeletal muscle contraction	3.14075166958149e-06	5.91975604864869e-05	4.68160916161301e-05	DMD/CAV3/KCNJ2/KBTBD13	4	38.1212121212121
BP	GO:0003208	cardiac ventricle morphogenesis	3.60045269657814e-06	6.72615543581987e-05	5.31934604263897e-05	GATA4/NKX2-5/TBX5/MYH6/TBX20/DSP	6	14.4967989756722
BP	GO:0009251	glucan catabolic process	3.96044002987819e-06	7.33376219567795e-05	5.79986877875052e-05	PYGM/PHKG2/PYGL/GAA	4	36.1148325358852
BP	GO:0034767	positive regulation of monoatomic ion transmembrane transport	4.022174708617e-06	7.38331374773087e-05	5.83905637333325e-05	ANK2/DMD/KCNE1/TRDN/KCNH2/CALM2/KCNJ2/NPPA	8	8.68584579976985
BP	GO:0098739	import across plasma membrane	4.19010226794167e-06	7.57579343097175e-05	5.99127795832417e-05	ABCC9/KCNJ3/SCN5A/ISCU/KCNH2/KCNJ2/CACNA1C/SLC6A1/SCN10A	9	7.28259005145798
BP	GO:0032409	regulation of transporter activity	4.19880545439931e-06	7.57579343097175e-05	5.99127795832417e-05	SCN4B/ANK2/DMD/SCN2B/KCNE1/SCN3B/TRDN/CAV3/CALM2/NPPA	10	6.33009057363301
BP	GO:0003170	heart valve development	4.23930427078629e-06	7.58404348782192e-05	5.99780247410086e-05	GATA4/GATA5/NPPA/NKX2-5/TBX5/TBX20	6	14.0996264009963
BP	GO:0060415	muscle tissue morphogenesis	4.59164190976732e-06	8.14534123657043e-05	6.44170196275185e-05	TTN/NKX2-5/MYH6/TBX20/DSP/ACTC1	6	13.9090909090909
BP	GO:0097623	potassium ion export across plasma membrane	4.9283465996937e-06	8.64679236409733e-05	6.83827205338371e-05	KCNE1/KCNH2/KCNA5/NPPA	4	34.3090909090909
BP	GO:0003176	aortic valve development	4.95623816227275e-06	8.64679236409733e-05	6.83827205338371e-05	GATA4/GATA5/NPPA/NKX2-5/TBX20	5	19.9471458773784
BP	GO:0034764	positive regulation of transmembrane transport	5.06531299194802e-06	8.69339489918885e-05	6.87512743280237e-05	ANK2/DMD/KCNE1/TRDN/TERT/KCNH2/CALM2/KCNJ2/NPPA	9	7.11478843736908
BP	GO:0071805	potassium ion transmembrane transport	5.06531299194802e-06	8.69339489918885e-05	6.87512743280237e-05	ANK2/ABCC9/KCNE1/KCNJ3/CAV3/KCNH2/KCNJ2/KCNA5/NPPA	9	7.11478843736908
BP	GO:0005977	glycogen metabolic process	5.3678125164325e-06	9.13826792112017e-05	7.22695301448382e-05	PYGM/PHKG2/PHKA2/PYGL/PHKA1/GAA	6	13.5430622009569
BP	GO:0043268	positive regulation of potassium ion transport	5.56580727037116e-06	9.39953531820281e-05	7.43357501541782e-05	ANK2/KCNE1/KCNH2/KCNJ2/NPPA	5	19.4938016528926
BP	GO:0007519	skeletal muscle tissue development	5.79696124467146e-06	9.63913807138498e-05	7.62306364218334e-05	EGR1/DMD/EGR2/SVIL/CITED2/BVES/ACTA1/RYR1	8	8.26725082146769
BP	GO:0006090	pyruvate metabolic process	5.8446692237673e-06	9.63913807138498e-05	7.62306364218334e-05	PCK1/PGM1/PGK1/ALDOA/LDHA/GIT1/ENO3	7	10.1764252696456
BP	GO:0043500	muscle adaptation	5.8446692237673e-06	9.63913807138498e-05	7.62306364218334e-05	SCN5A/CAV3/GATA5/NPPA/ACTA1/MYH6/MLIP	7	10.1764252696456
BP	GO:0000272	polysaccharide catabolic process	6.06065683496422e-06	9.91786556481354e-05	7.84349387209568e-05	PYGM/PHKG2/PYGL/GAA	4	32.6753246753247
BP	GO:0045214	sarcomere organization	6.23259350217727e-06	0.000100672501110573	7.9616338857298e-05	CAV3/OBSCN/TTN/MYH6/MYPN	5	19.0606060606061
BP	GO:0044042	glucan metabolic process	6.24732242798912e-06	0.000100672501110573	7.9616338857298e-05	PYGM/PHKG2/PHKA2/PYGL/PHKA1/GAA	6	13.1958041958042
BP	GO:0003228	atrial cardiac muscle tissue development	7.37425645278415e-06	0.000117045529111484	9.25648653273896e-05	BVES/NKX2-5/TBX5/MYH6	4	31.1900826446281
BP	GO:0010881	regulation of cardiac muscle contraction by regulation of the release of sequestered calcium ion	7.37425645278415e-06	0.000117045529111484	9.25648653273896e-05	ANK2/DMD/CALM2/CACNA1C	4	31.1900826446281
BP	GO:1905314	semi-lunar valve development	7.75297078409398e-06	0.000120804631323101	9.55377323186508e-05	GATA4/GATA5/NPPA/NKX2-5/TBX20	5	18.2495164410058
BP	GO:0048644	muscle organ morphogenesis	7.78277113213725e-06	0.000120804631323101	9.55377323186508e-05	TTN/NKX2-5/MYH6/TBX20/DSP/ACTC1	6	12.7070707070707
BP	GO:1901019	regulation of calcium ion transmembrane transporter activity	7.78277113213725e-06	0.000120804631323101	9.55377323186508e-05	ANK2/DMD/TRDN/CAV3/CALM2/NPPA	6	12.7070707070707
BP	GO:0060538	skeletal muscle organ development	9.67707419302981e-06	0.000149111705266321	0.000117924238725665	EGR1/DMD/EGR2/SVIL/CITED2/BVES/ACTA1/RYR1	8	7.70990806945863
BP	GO:2000649	regulation of sodium ion transmembrane transporter activity	1.05610829955823e-05	0.00016155395799764	0.000127764131433971	SCN4B/DMD/SCN2B/SCN3B/CAV3	5	17.1545454545455
BP	GO:1901379	regulation of potassium ion transmembrane transport	1.10119996177518e-05	0.000167239792755929	0.000132260745124986	ANK2/KCNE1/CAV3/KCNH2/KCNJ2/NPPA	6	11.9682875264271
BP	GO:0006813	potassium ion transport	1.17947977177793e-05	0.000177848699873087	0.000140650745717279	ANK2/ABCC9/KCNE1/KCNJ3/CAV3/KCNH2/KCNJ2/KCNA5/NPPA	9	6.40626178800453
BP	GO:0035994	response to muscle stretch	1.25817564274421e-05	0.000187042871960073	0.000147921910258882	DMD/CAV3/TTN/NPPA	4	27.4472727272727
BP	GO:0086064	cell communication by electrical coupling involved in cardiac conduction	1.25817564274421e-05	0.000187042871960073	0.000147921910258882	TRDN/CALM2/CACNA1C/TBX5	4	27.4472727272727
BP	GO:0003197	endocardial cushion development	1.28352696454868e-05	0.00018947730224911	0.000149847167153052	GATA4/GATA5/CITED2/TBX5/TBX20	5	16.4947552447552
BP	GO:0006096	glycolytic process	1.3419559615707e-05	0.000194032125676421	0.000153449326247378	PGM1/PGK1/ALDOA/LDHA/GIT1/ENO3	6	11.5648621041879
BP	GO:0006112	energy reserve metabolic process	1.3419559615707e-05	0.000194032125676421	0.000153449326247378	PYGM/PHKG2/PHKA2/PYGL/PHKA1/GAA	6	11.5648621041879
BP	GO:0055017	cardiac muscle tissue growth	1.3419559615707e-05	0.000194032125676421	0.000153449326247378	CAV3/GATA4/CITED2/NKX2-5/TBX5/TBX20	6	11.5648621041879
BP	GO:0010882	regulation of cardiac muscle contraction by calcium ion signaling	1.48027181218341e-05	0.000212575088130557	0.000168113934416247	ANK2/DMD/CALM2/CACNA1C	4	26.3916083916084
BP	GO:1904063	negative regulation of cation transmembrane transport	1.6235721181694e-05	0.00023157842847673	0.000183142630114984	KCNE1/TRDN/CAV3/ISCU/KCNH2/CALM2	6	11.1877470355731
BP	GO:0014866	skeletal myofibril assembly	2.24506358214e-05	0.000318075786704533	0.000251548628843097	TTN/ACTA1/ACTC1	3	51.4636363636364
BP	GO:0098901	regulation of cardiac muscle cell action potential	2.32023788385986e-05	0.000326534811521877	0.000258238405880823	ANK2/CAV3/CACNA1C/DSP	4	23.6614420062696
BP	GO:0034766	negative regulation of monoatomic ion transmembrane transport	2.61374629513766e-05	0.000365405193975867	0.000288978851452654	KCNE1/TRDN/CAV3/ISCU/KCNH2/CALM2	6	10.2927272727273
BP	GO:0097553	calcium ion transmembrane import into cytosol	2.68747845684324e-05	0.000373241251473426	0.000295175957933059	ANK2/DMD/SCN5A/TRDN/CALM2/CACNA1C/RYR1/SCN10A	8	6.69445676274945
BP	GO:0005976	polysaccharide metabolic process	2.92481464243883e-05	0.000403547954914272	0.000319143861225179	PYGM/PHKG2/PHKA2/PYGL/PHKA1/GAA	6	10.0909090909091
BP	GO:0031032	actomyosin structure organization	2.98155752401377e-05	0.000408705709947601	0.000323222845733823	CAV3/OBSCN/TTN/NKX2-5/ACTA1/MYH6/ACTC1/MYPN	8	6.5979020979021
BP	GO:0060920	cardiac pacemaker cell differentiation	3.07385453148907e-05	0.000415955571536758	0.000328956362141813	BVES/NKX2-5/TBX5	3	46.7851239669421
BP	GO:1901844	regulation of cell communication by electrical coupling involved in cardiac conduction	3.07385453148907e-05	0.000415955571536758	0.000328956362141813	TRDN/CALM2/TBX5	3	46.7851239669421
BP	GO:0010644	cell communication by electrical coupling	3.46595779413264e-05	0.00046602782824293	0.000368555753368714	TRDN/CALM2/CACNA1C/TBX5	4	21.4431818181818
BP	GO:0055021	regulation of cardiac muscle tissue growth	3.84113894833993e-05	0.000513205336705418	0.000405865847572761	CAV3/CITED2/NKX2-5/TBX5/TBX20	5	13.1958041958042
BP	GO:0070588	calcium ion transmembrane transport	4.03365077268366e-05	0.000533105400304278	0.000421603712325206	ANK2/DMD/SCN5A/TRDN/CAV3/CALM2/CACNA1C/NPPA/RYR1/SCN10A	10	4.87345041322314
BP	GO:0003279	cardiac septum development	4.04059043338155e-05	0.000533105400304278	0.000421603712325206	ANK2/GATA4/CITED2/NKX2-5/TBX5/TBX20	6	9.53030303030303
BP	GO:0003207	cardiac chamber formation	4.08107399466393e-05	0.000535102310728916	0.000423182958845177	NKX2-5/TBX5/TBX20	3	42.8863636363636
BP	GO:0050905	neuromuscular process	4.7617814045524e-05	0.000620501268210501	0.000490720292892794	COMP/CCDC78/DMD/CAV3/KCNJ2/KBTBD13/GAA	7	7.36698271054099
BP	GO:0006816	calcium ion transport	5.80838621561303e-05	0.000752239466328779	0.000594904781269762	ANK2/DMD/SCN5A/TRDN/CAV3/CALM2/CACNA1C/NPPA/IL16/RYR1/SCN10A	11	4.24044943820225
BP	GO:0060411	cardiac septum morphogenesis	6.29942371859846e-05	0.000810858748168374	0.00064126354413974	GATA4/CITED2/NKX2-5/TBX5/TBX20	5	11.9128787878788
BP	GO:1903169	regulation of calcium ion transmembrane transport	7.19753916784102e-05	0.00092084879898863	0.000728248620108189	ANK2/DMD/TRDN/CAV3/CALM2/CACNA1C/NPPA	7	6.9012539184953
BP	GO:0010649	regulation of cell communication by electrical coupling	8.33341825690293e-05	0.00105692503715407	0.000835863825538587	TRDN/CALM2/TBX5	3	34.3090909090909
BP	GO:2001257	regulation of cation channel activity	8.36127338724444e-05	0.00105692503715407	0.000835863825538587	ANK2/DMD/KCNE1/TRDN/CALM2/NPPA	6	8.36807095343681
BP	GO:0051924	regulation of calcium ion transport	0.000111680029786047	0.00140331275522825	0.00110980280225984	ANK2/DMD/TRDN/CAV3/CALM2/CACNA1C/NPPA/IL16	8	5.46758420862006
BP	GO:0140115	export across plasma membrane	0.000117302963445245	0.00146524589250244	0.00115878231095708	KCNE1/KCNH2/CALM2/KCNA5/NPPA	5	10.460088691796
BP	GO:0001570	vasculogenesis	0.000124247605515674	0.00153384032306192	0.00121302986979292	NTRK2/CITED2/NKX2-5/TBX5/TBX20	5	10.3340635268346
BP	GO:0051279	regulation of release of sequestered calcium ion into cytosol	0.000124247605515674	0.00153384032306192	0.00121302986979292	ANK2/DMD/TRDN/CALM2/CACNA1C	5	10.3340635268346
BP	GO:0060485	mesenchyme development	0.000126419321459649	0.00155157667210069	0.00122705657181764	GATA4/GATA5/CITED2/NKX2-5/ACTA1/TBX5/TBX20/ACTC1/NRTN	9	4.72143452877398
BP	GO:0043271	negative regulation of monoatomic ion transport	0.000128714928751594	0.00157061973754113	0.00124211668390647	KCNE1/TRDN/CAV3/ISCU/KCNH2/CALM2	6	7.73889268626111
BP	GO:0140694	non-membrane-bounded organelle assembly	0.000137107311445654	0.00166341111759642	0.00131550027799642	CCDC78/CAV3/OBSCN/TTN/C1QBP/NKX2-5/ACTA1/MYH6/ACTC1/MYPN	10	4.20454545454545
BP	GO:0032414	positive regulation of ion transmembrane transporter activity	0.000139078781282986	0.00167768747021934	0.00132679065933724	ANK2/DMD/TRDN/CALM2/NPPA	5	10.0909090909091
BP	GO:0051209	release of sequestered calcium ion into cytosol	0.000145458526463066	0.00174467584865644	0.00137976807996665	ANK2/DMD/TRDN/CALM2/CACNA1C/RYR1	6	7.56818181818182
BP	GO:1990573	potassium ion import across plasma membrane	0.000147717822813246	0.0017617645421399	0.00139328258686773	ABCC9/KCNJ3/KCNH2/KCNJ2	4	14.9169960474308
BP	GO:0051283	negative regulation of sequestering of calcium ion	0.000151407482883986	0.00179562469869716	0.0014200607206032	ANK2/DMD/TRDN/CALM2/CACNA1C/RYR1	6	7.5129396151294
BP	GO:0060043	regulation of cardiac muscle cell proliferation	0.000160737809048516	0.00189562857486825	0.00149914828080533	CITED2/NKX2-5/TBX5/TBX20	4	14.5996131528046
BP	GO:0051282	regulation of sequestering of calcium ion	0.000163882975390827	0.00192198311694464	0.00151999063725059	ANK2/DMD/TRDN/CALM2/CACNA1C/RYR1	6	7.40483976455199
BP	GO:0055003	cardiac myofibril assembly	0.000174483867577468	0.00203500245555821	0.00160937141016496	TTN/NKX2-5/ACTC1	3	27.0861244019139
BP	GO:2001259	positive regulation of cation channel activity	0.000189235478372029	0.00219439997279498	0.00173543013131858	ANK2/TRDN/CALM2/NPPA	4	14.0037105751391
BP	GO:0014074	response to purine-containing compound	0.000191269348647218	0.00219439997279498	0.00173543013131858	PCK1/ABCC9/VGF/KCNE1/SLC6A1/RYR1	6	7.19771137952956
BP	GO:0051208	sequestering of calcium ion	0.000191269348647218	0.00219439997279498	0.00173543013131858	ANK2/DMD/TRDN/CALM2/CACNA1C/RYR1	6	7.19771137952956
BP	GO:0032271	regulation of protein polymerization	0.000193489602478044	0.00220787324773595	0.00174608540273217	CAV3/CSF3/GRB2/SPTA1/SPTB/SVIL/GIT1	7	5.88636363636364
BP	GO:0034763	negative regulation of transmembrane transport	0.000198650036172169	0.0022545711094594	0.00178301617073605	KCNE1/TRDN/CAV3/ISCU/KCNH2/CALM2	6	7.14772727272727
BP	GO:0003215	cardiac right ventricle morphogenesis	0.000204405430102957	0.00230748589811413	0.00182486356399263	GATA4/NKX2-5/TBX20	3	25.7318181818182
BP	GO:0032411	positive regulation of transporter activity	0.000223275476850646	0.00250709857250911	0.00198272623899846	ANK2/DMD/TRDN/CALM2/NPPA	5	9.1247582205029
BP	GO:0014888	striated muscle adaptation	0.000296544345224903	0.00331219636386122	0.00261943375954718	NPPA/ACTA1/MYH6/MLIP	4	12.4760330578512
BP	GO:0072132	mesenchyme morphogenesis	0.000340400788008773	0.0037622306988823	0.00297534113960823	GATA5/ACTA1/TBX20/ACTC1	4	12.0382775119617
BP	GO:1901016	regulation of potassium ion transmembrane transporter activity	0.000340400788008773	0.0037622306988823	0.00297534113960823	ANK2/KCNE1/CAV3/NPPA	4	12.0382775119617
BP	GO:0046716	muscle cell cellular homeostasis	0.000356801759746311	0.00391951647820355	0.00309972980350088	DMD/ALDOA/GAA	3	21.4431818181818
BP	GO:0001666	response to hypoxia	0.000358345182516952	0.00391951647820355	0.00309972980350088	EGR1/PCK1/CAV3/PGK1/TERT/KCNA5/CITED2/RYR1	8	4.6052471018914
BP	GO:0003229	ventricular cardiac muscle tissue development	0.000363985320143025	0.00396068562279343	0.00313228821349342	NKX2-5/TBX5/MYH6/DSP	4	11.8307210031348
BP	GO:0060038	cardiac muscle cell proliferation	0.000388716140866735	0.00420810140189578	0.00332795573233275	CITED2/NKX2-5/TBX5/TBX20	4	11.6302003081664
BP	GO:0019318	hexose metabolic process	0.000433092288575865	0.00466458072032475	0.00368896009495877	PCK1/PHKG2/PGM1/PGK1/ALDOA/GAA/ENO3	7	5.15372610222396
BP	GO:0060314	regulation of ryanodine-sensitive calcium-release channel activity	0.000454471911932254	0.004870001046137	0.00385141572174488	DMD/TRDN/CALM2	3	19.7937062937063
BP	GO:0051651	maintenance of location in cell	0.000479461772250262	0.00511183737990052	0.00404267076442805	ANK2/DMD/TRDN/CALM2/GAA/CACNA1C/RYR1	7	5.06674338319908
BP	GO:0036293	response to decreased oxygen levels	0.000517555352360567	0.00549024798408621	0.00434193487883554	EGR1/PCK1/CAV3/PGK1/TERT/KCNA5/CITED2/RYR1	8	4.35670995670996
BP	GO:0001947	heart looping	0.00056296060635131	0.00590457794791424	0.00466960563733426	GATA4/CITED2/NKX2-5/TBX20	4	10.5566433566434
BP	GO:0055022	negative regulation of cardiac muscle tissue growth	0.000567801669079389	0.00590457794791424	0.00466960563733426	CAV3/CITED2/TBX5	3	18.3798701298701
BP	GO:0061117	negative regulation of heart growth	0.000567801669079389	0.00590457794791424	0.00466960563733426	CAV3/CITED2/TBX5	3	18.3798701298701
BP	GO:1903779	regulation of cardiac conduction	0.000567801669079389	0.00590457794791424	0.00466960563733426	ANK2/NKX2-5/TBX5	3	18.3798701298701
BP	GO:0003171	atrioventricular valve development	0.000630640048722557	0.00649405435538204	0.00513579007586124	GATA4/TBX5/TBX20	3	17.7460815047022
BP	GO:0099505	regulation of presynaptic membrane potential	0.000630640048722557	0.00649405435538204	0.00513579007586124	KCNJ3/GABRR1/SCN10A	3	17.7460815047022
BP	GO:1901021	positive regulation of calcium ion transmembrane transporter activity	0.000697749822959629	0.00711569988535158	0.00562741530238481	ANK2/TRDN/CALM2	3	17.1545454545455
BP	GO:1901380	negative regulation of potassium ion transmembrane transport	0.000697749822959629	0.00711569988535158	0.00562741530238481	KCNE1/CAV3/KCNH2	3	17.1545454545455
BP	GO:0051259	protein complex oligomerization	0.000739559847261775	0.00750582133446927	0.00593594087933793	COMP/FARSA/ALDOA/KCNJ2/KCNA5/ABCA3/RYR1	7	4.70909090909091
BP	GO:0061371	determination of heart left/right asymmetry	0.000745579684619214	0.00753071155134526	0.00595562518159694	GATA4/CITED2/NKX2-5/TBX20	4	9.8025974025974
BP	GO:0003299	muscle hypertrophy in response to stress	0.000769244784332643	0.00765979122512363	0.00605770718943184	NPPA/MYH6/MLIP	3	16.6011730205279
BP	GO:0014887	cardiac muscle adaptation	0.000769244784332643	0.00765979122512363	0.00605770718943184	NPPA/MYH6/MLIP	3	16.6011730205279
BP	GO:0014898	cardiac muscle hypertrophy in response to stress	0.000769244784332643	0.00765979122512363	0.00605770718943184	NPPA/MYH6/MLIP	3	16.6011730205279
BP	GO:0003143	embryonic heart tube morphogenesis	0.00078657601715185	0.00779559611365049	0.00616510779937155	GATA4/CITED2/NKX2-5/TBX20	4	9.66453265044814
BP	GO:0015980	energy derivation by oxidation of organic compounds	0.00080421105620353	0.00793312868993296	0.00627387474244368	PYGM/PHKG2/ISCU/PHKA2/PYGL/PHKA1/GAA/ATP5F1E	8	4.07229565686539
BP	GO:0005996	monosaccharide metabolic process	0.000847532932843966	0.0083215907964354	0.00658108803667334	PCK1/PHKG2/PGM1/PGK1/ALDOA/GAA/ENO3	7	4.60083594566353
BP	GO:0032413	negative regulation of ion transmembrane transporter activity	0.000873303430886387	0.00853492380833872	0.00674980137127588	KCNE1/TRDN/CAV3/CALM2	4	9.39975093399751
BP	GO:0070482	response to oxygen levels	0.000901294413414268	0.00876789173602543	0.00693404287982066	EGR1/PCK1/CAV3/PGK1/TERT/KCNA5/CITED2/RYR1	8	4.00106016432547
BP	GO:0003281	ventricular septum development	0.000919100222133126	0.00890009435285793	0.0070385946513913	GATA4/CITED2/NKX2-5/TBX5	4	9.27272727272727
BP	GO:0006006	glucose metabolic process	0.000940190946131238	0.00906275382321025	0.00716723307168538	PCK1/PHKG2/PGM1/PGK1/GAA/ENO3	6	5.33301931229392
BP	GO:0051260	protein homooligomerization	0.000965666522326105	0.00926600922104731	0.00732797657612059	COMP/ALDOA/KCNJ2/KCNA5/ABCA3/RYR1	6	5.30552952202437
BP	GO:0055075	potassium ion homeostasis	0.00101114336646012	0.00965847803890188	0.00763835855777924	KCNH2/KCNJ2/KCNA5	3	15.1363636363636
BP	GO:0051235	maintenance of location	0.00102623520865672	0.00975847984447899	0.00771744448046258	PNPLA2/ANK2/DMD/TRDN/CALM2/GAA/CACNA1C/RYR1	8	3.92103896103896
BP	GO:0010614	negative regulation of cardiac muscle hypertrophy	0.00110127006486478	0.0104250273853343	0.00824458023542856	CAV3/GATA5/MLIP	3	14.7038961038961
BP	GO:0030833	regulation of actin filament polymerization	0.00120686566541064	0.0113736313378655	0.00899477887848344	CSF3/GRB2/SPTA1/SPTB/SVIL	5	6.30681818181818
BP	GO:0003151	outflow tract morphogenesis	0.00128816386393985	0.0120028963883047	0.00949242996427298	CITED2/NKX2-5/TBX20/RYR1	4	8.47138047138047
BP	GO:0014741	negative regulation of muscle hypertrophy	0.00129638104051799	0.0120028963883047	0.00949242996427298	CAV3/GATA5/MLIP	3	13.9090909090909
BP	GO:0043267	negative regulation of potassium ion transport	0.00129638104051799	0.0120028963883047	0.00949242996427298	KCNE1/CAV3/KCNH2	3	13.9090909090909
BP	GO:0046621	negative regulation of organ growth	0.00129638104051799	0.0120028963883047	0.00949242996427298	CAV3/CITED2/TBX5	3	13.9090909090909
BP	GO:0007492	endoderm development	0.00141018069152709	0.0129430062600595	0.0102359111064621	GATA4/COL12A1/GRB2/TBX20	4	8.26725082146769
BP	GO:0014855	striated muscle cell proliferation	0.00141018069152709	0.0129430062600595	0.0102359111064621	CITED2/NKX2-5/TBX5/TBX20	4	8.26725082146769
BP	GO:0051258	protein polymerization	0.00143847073627917	0.0131455052999365	0.010396056449026	CAV3/CSF3/GRB2/SPTA1/SPTB/SVIL/GIT1	7	4.19866497139224
BP	GO:0061418	regulation of transcription from RNA polymerase II promoter in response to hypoxia	0.00146976520107357	0.0133735962908031	0.0105764410567272	EGR1/CITED2	2	34.3090909090909
BP	GO:0045823	positive regulation of heart contraction	0.00151195782660943	0.0136984676908691	0.0108333639620626	SCN3B/NPPA/NKX2-5	3	13.1958041958042
BP	GO:0035050	embryonic heart tube development	0.00154004226461715	0.0138932872675505	0.0109874360399586	GATA4/CITED2/NKX2-5/TBX20	4	8.07272727272727
BP	GO:0051592	response to calcium ion	0.0015547182434286	0.0139660009016076	0.0110449412500684	SCN5A/CALM2/TTN/SLC6A1/RYR1	5	5.95643939393939
BP	GO:0051693	actin filament capping	0.00162765862926354	0.0144978369889255	0.0114655411326315	SPTA1/SPTB/SVIL	3	12.8659090909091
BP	GO:1903524	positive regulation of blood circulation	0.00162765862926354	0.0144978369889255	0.0114655411326315	SCN3B/NPPA/NKX2-5	3	12.8659090909091
BP	GO:0071456	cellular response to hypoxia	0.00170247692007872	0.0151005410852361	0.0119421866220471	EGR1/PCK1/PGK1/TERT/CITED2	5	5.83487940630798
BP	GO:0009165	nucleotide biosynthetic process	0.00171624779912678	0.0151589920667641	0.0119884122854661	TK2/FLAD1/AMPD1/ALDOA/ATP5F1E/NPPA/RRM2B	7	4.07057010785824
BP	GO:1901293	nucleoside phosphate biosynthetic process	0.00178329150224914	0.0155462458142707	0.012294669955089	TK2/FLAD1/AMPD1/ALDOA/ATP5F1E/NPPA/RRM2B	7	4.04315886134068
BP	GO:0060315	negative regulation of ryanodine-sensitive calcium-release channel activity	0.00178954890235328	0.0155462458142707	0.012294669955089	TRDN/CALM2	2	31.1900826446281
BP	GO:0060923	cardiac muscle cell fate commitment	0.00178954890235328	0.0155462458142707	0.012294669955089	NKX2-5/TBX5	2	31.1900826446281
BP	GO:2000169	regulation of peptidyl-cysteine S-nitrosylation	0.00178954890235328	0.0155462458142707	0.012294669955089	DMD/SNTA1	2	31.1900826446281
BP	GO:0006094	gluconeogenesis	0.00190072450253609	0.0163772629585865	0.0129518756649721	PCK1/PGM1/PGK1/ENO3	4	7.62424242424242
BP	GO:0051262	protein tetramerization	0.00190072450253609	0.0163772629585865	0.0129518756649721	FARSA/ALDOA/KCNJ2/RYR1	4	7.62424242424242
BP	GO:0032273	positive regulation of protein polymerization	0.0019792958871074	0.0169849334052184	0.0134324487674469	CAV3/CSF3/GRB2/GIT1	4	7.54045954045954
BP	GO:0008064	regulation of actin polymerization or depolymerization	0.00208707921602921	0.0178373450406383	0.0141065742025243	CSF3/GRB2/SPTA1/SPTB/SVIL	5	5.56965761511216
BP	GO:0003163	sinoatrial node development	0.00213929653483461	0.0179712997913768	0.0142125116403419	BVES/TBX5	2	28.5909090909091
BP	GO:0098911	regulation of ventricular cardiac muscle cell action potential	0.00213929653483461	0.0179712997913768	0.0142125116403419	CACNA1C/DSP	2	28.5909090909091
BP	GO:0019319	hexose biosynthetic process	0.00214313041985587	0.0179712997913768	0.0142125116403419	PCK1/PGM1/PGK1/ENO3	4	7.3782991202346
BP	GO:0043502	regulation of muscle adaptation	0.00214313041985587	0.0179712997913768	0.0142125116403419	SCN5A/CAV3/GATA5/MLIP	4	7.3782991202346
BP	GO:0030835	negative regulation of actin filament depolymerization	0.00214531859186497	0.0179712997913768	0.0142125116403419	SPTA1/SPTB/SVIL	3	11.6962809917355
BP	GO:0006874	intracellular calcium ion homeostasis	0.00218926509526704	0.0182669510518132	0.0144463259458853	ANK2/DMD/TRDN/CAV3/CALM2/CACNA1C/RYR1	7	3.89876033057851
BP	GO:0030832	regulation of actin filament length	0.00226995203748864	0.0188656250044823	0.0149197842165644	CSF3/GRB2/SPTA1/SPTB/SVIL	5	5.46323103647944
BP	GO:0036294	cellular response to decreased oxygen levels	0.00233342576665838	0.0193171050722189	0.0152768349470389	EGR1/PCK1/PGK1/TERT/CITED2	5	5.42865362485616
BP	GO:0006264	mitochondrial DNA replication	0.00251865430587125	0.0205284912729506	0.0162348536033806	DNA2/RRM2B	2	26.3916083916084
BP	GO:0007512	adult heart development	0.00251865430587125	0.0205284912729506	0.0162348536033806	NKX2-5/MYH6	2	26.3916083916084
BP	GO:0036302	atrioventricular canal development	0.00251865430587125	0.0205284912729506	0.0162348536033806	GATA4/TBX20	2	26.3916083916084
BP	GO:0051280	negative regulation of release of sequestered calcium ion into cytosol	0.00251865430587125	0.0205284912729506	0.0162348536033806	TRDN/CALM2	2	26.3916083916084
BP	GO:0032410	negative regulation of transporter activity	0.00259323374496639	0.0209769316165347	0.0165895003833674	KCNE1/TRDN/CAV3/CALM2	4	7.00185528756957
BP	GO:0055010	ventricular cardiac muscle tissue morphogenesis	0.00259354767973262	0.0209769316165347	0.0165895003833674	NKX2-5/MYH6/DSP	3	10.9497098646035
BP	GO:0045776	negative regulation of blood pressure	0.00275481304494087	0.0221330107689892	0.0175037797400169	ABCC9/GPR37L1/NPPA	3	10.7215909090909
BP	GO:0030198	extracellular matrix organization	0.00275745231276369	0.0221330107689892	0.0175037797400169	COMP/COL12A1/TLL1/COL9A3/COL13A1/COL9A1/COL9A2	7	3.74086661002549
BP	GO:0043062	extracellular structure organization	0.00280544241354495	0.0224329126325507	0.0177409556135657	COMP/COL12A1/TLL1/COL9A3/COL13A1/COL9A1/COL9A2	7	3.72924901185771
BP	GO:0045229	external encapsulating structure organization	0.00285407216203009	0.022735646543568	0.0179803711975361	COMP/COL12A1/TLL1/COL9A3/COL13A1/COL9A1/COL9A2	7	3.7177033492823
BP	GO:2001258	negative regulation of cation channel activity	0.00292213332102144	0.023144082624629	0.0183033808086273	KCNE1/TRDN/CALM2	3	10.5027829313544
BP	GO:0050930	induction of positive chemotaxis	0.00292727146412883	0.023144082624629	0.0183033808086273	SCG2/IL16	2	24.5064935064935
BP	GO:0030041	actin filament polymerization	0.00296425356953512	0.0233490271839128	0.0184654601778582	CSF3/GRB2/SPTA1/SPTB/SVIL	5	5.13609145345672
BP	GO:0046364	monosaccharide biosynthetic process	0.00299706154635376	0.0235196911685977	0.0186004289278696	PCK1/PGM1/PGK1/ENO3	4	6.72727272727273
BP	GO:0048638	regulation of developmental growth	0.00310701267512805	0.0242922361377604	0.0192113922134623	CAV3/DUSP6/CITED2/NKX2-5/TBX5/MYH6/TBX20	7	3.6610310421286
BP	GO:0043254	regulation of protein-containing complex assembly	0.00315640360497165	0.0245873358306094	0.0194447703145661	CAV3/CSF3/GRB2/SPTA1/SPTB/SVIL/ABCA3/GIT1	8	3.27533087437622
BP	GO:0055074	calcium ion homeostasis	0.00326681448346085	0.0253538432889186	0.0200509588652048	ANK2/DMD/TRDN/CAV3/CALM2/CACNA1C/RYR1	7	3.62784949189783
BP	GO:0048368	lateral mesoderm development	0.00336480027667649	0.0258294304875057	0.0204270745983116	CITED2/TBX20	2	22.8727272727273
BP	GO:0051284	positive regulation of sequestering of calcium ion	0.00336480027667649	0.0258294304875057	0.0204270745983116	TRDN/CALM2	2	22.8727272727273
BP	GO:0060347	heart trabecula formation	0.00336480027667649	0.0258294304875057	0.0204270745983116	CAV3/NKX2-5	2	22.8727272727273
BP	GO:0071214	cellular response to abiotic stimulus	0.00343283296933315	0.0261614093800082	0.0206896184281299	EGR1/PCK1/KCNE1/ELK1/GRB2/KCNJ2/PIEZO2	7	3.59526401741971
BP	GO:0104004	cellular response to environmental stimulus	0.00343283296933315	0.0261614093800082	0.0206896184281299	EGR1/PCK1/KCNE1/ELK1/GRB2/KCNJ2/PIEZO2	7	3.59526401741971
BP	GO:0071453	cellular response to oxygen levels	0.00353383868313886	0.0268342930219645	0.0212217650566385	EGR1/PCK1/PGK1/TERT/CITED2	5	4.9294670846395
BP	GO:0030834	regulation of actin filament depolymerization	0.00365340322589033	0.0275440507494803	0.0217830733694063	SPTA1/SPTB/SVIL	3	9.71012006861063
BP	GO:0050982	detection of mechanical stimulus	0.00365340322589033	0.0275440507494803	0.0217830733694063	CAV3/TTN/PIEZO2	3	9.71012006861063
BP	GO:0003188	heart valve formation	0.00383089600623842	0.0279827732497208	0.0221300348420839	GATA4/TBX20	2	21.4431818181818
BP	GO:0017014	protein nitrosylation	0.00383089600623842	0.0279827732497208	0.0221300348420839	DMD/SNTA1	2	21.4431818181818
BP	GO:0018119	peptidyl-cysteine S-nitrosylation	0.00383089600623842	0.0279827732497208	0.0221300348420839	DMD/SNTA1	2	21.4431818181818
BP	GO:0033275	actin-myosin filament sliding	0.00383089600623842	0.0279827732497208	0.0221300348420839	MYH6/ACTC1	2	21.4431818181818
BP	GO:0060044	negative regulation of cardiac muscle cell proliferation	0.00383089600623842	0.0279827732497208	0.0221300348420839	CITED2/TBX5	2	21.4431818181818
BP	GO:0060841	venous blood vessel development	0.00383089600623842	0.0279827732497208	0.0221300348420839	NKX2-5/TBX20	2	21.4431818181818
BP	GO:0060911	cardiac cell fate commitment	0.00383089600623842	0.0279827732497208	0.0221300348420839	NKX2-5/TBX5	2	21.4431818181818
BP	GO:0070131	positive regulation of mitochondrial translation	0.00383089600623842	0.0279827732497208	0.0221300348420839	C1QBP/COA3	2	21.4431818181818
BP	GO:0090136	epithelial cell-cell adhesion	0.00383089600623842	0.0279827732497208	0.0221300348420839	BVES/DSP	2	21.4431818181818
BP	GO:0098703	calcium ion import across plasma membrane	0.00385206166694196	0.0280403523410844	0.0221755709755715	SCN5A/CACNA1C/SCN10A	3	9.53030303030303
BP	GO:0071772	response to BMP	0.00398616356632384	0.0288177783853069	0.0227903944347138	COMP/EGR1/GATA4/GATA5/TBX20	5	4.79177247333672
BP	GO:0071773	cellular response to BMP stimulus	0.00398616356632384	0.0288177783853069	0.0227903944347138	COMP/EGR1/GATA4/GATA5/TBX20	5	4.79177247333672
BP	GO:0060840	artery development	0.00405859989584411	0.0292413118775663	0.0231253437571718	COMP/EGR2/CITED2/GAA	4	6.18181818181818
BP	GO:0071468	cellular response to acidic pH	0.00432521688860428	0.0310562341899444	0.0245606658980537	PCK1/KCNE1	2	20.1818181818182
BP	GO:0001706	endoderm formation	0.00471198718420302	0.0336047464386912	0.0265761439336629	COL12A1/GRB2/TBX20	3	8.8730407523511
BP	GO:0030042	actin filament depolymerization	0.00471198718420302	0.0336047464386912	0.0265761439336629	SPTA1/SPTB/SVIL	3	8.8730407523511
BP	GO:0006735	NADH regeneration	0.00484742411019739	0.0339963863675305	0.0268858703926318	PGK1/ENO3	2	19.0606060606061
BP	GO:0010002	cardioblast differentiation	0.00484742411019739	0.0339963863675305	0.0268858703926318	NKX2-5/TBX5	2	19.0606060606061
BP	GO:0061621	canonical glycolysis	0.00484742411019739	0.0339963863675305	0.0268858703926318	PGK1/ENO3	2	19.0606060606061
BP	GO:0061718	glucose catabolic process to pyruvate	0.00484742411019739	0.0339963863675305	0.0268858703926318	PGK1/ENO3	2	19.0606060606061
BP	GO:1905209	positive regulation of cardiocyte differentiation	0.00484742411019739	0.0339963863675305	0.0268858703926318	NKX2-5/TBX5	2	19.0606060606061
BP	GO:0051289	protein homotetramerization	0.00494359099009603	0.0343291551183936	0.0271490388779437	ALDOA/KCNJ2/RYR1	3	8.72265023112481
BP	GO:0003018	vascular process in circulatory system	0.00494365852960287	0.0343291551183936	0.0271490388779437	COMP/ABCC9/SNTA1/KCNA5/NPPA/SLC6A1	6	3.82629266644137
BP	GO:0032868	response to insulin	0.00494365852960287	0.0343291551183936	0.0271490388779437	EGR1/PCK1/VGF/EGR2/HADHA/GRB2	6	3.82629266644137
BP	GO:0060039	pericardium development	0.00539718178579974	0.0371122174261344	0.0293500096426484	TBX5/TBX20	2	18.0574162679426
BP	GO:0061577	calcium ion transmembrane transport via high voltage-gated calcium channel	0.00539718178579974	0.0371122174261344	0.0293500096426484	CACNA1C/NPPA	2	18.0574162679426
BP	GO:1902259	regulation of delayed rectifier potassium channel activity	0.00539718178579974	0.0371122174261344	0.0293500096426484	KCNE1/NPPA	2	18.0574162679426
BP	GO:1902074	response to salt	0.00563200702130986	0.0386011909804711	0.0305275568550835	EGR1/ABCC9/SCN5A/CALM2/TTN/SLC6A1/RYR1	7	3.28092399403875
BP	GO:0008154	actin polymerization or depolymerization	0.00583480081838642	0.0398616975003681	0.0315244220676575	CSF3/GRB2/SPTA1/SPTB/SVIL	5	4.37615955473098
BP	GO:0002931	response to ischemia	0.00593816651828859	0.040421299015415	0.0319669800984558	EGR1/CAV3/BVES	3	8.16883116883117
BP	GO:0042693	muscle cell fate commitment	0.00597415693643272	0.040421299015415	0.0319669800984558	NKX2-5/TBX5	2	17.1545454545455
BP	GO:0061620	glycolytic process through glucose-6-phosphate	0.00597415693643272	0.040421299015415	0.0319669800984558	PGK1/ENO3	2	17.1545454545455
BP	GO:0031334	positive regulation of protein-containing complex assembly	0.00608612348982648	0.0410473057093409	0.0324620543294596	CAV3/CSF3/GRB2/ABCA3/GIT1	5	4.33195592286501
BP	GO:1904036	negative regulation of epithelial cell apoptotic process	0.00620410844601374	0.041709786399793	0.0329859738363319	TERT/SCG2/NKX2-5	3	8.04119318181818
BP	GO:2000027	regulation of animal organ morphogenesis	0.00634740599221048	0.0425376953954169	0.0336407214825257	MAGED1/CAV3/GATA5/CITED2	4	5.44588744588745
BP	GO:0030199	collagen fibril organization	0.00647706721244903	0.0432692686249364	0.0342192824748306	COMP/COL12A1/TLL1	3	7.91748251748252
BP	GO:0046683	response to organophosphorus	0.00652493426137089	0.0433943721739553	0.0343182199844888	PCK1/ABCC9/VGF/KCNE1	4	5.40300644237652
BP	GO:0060973	cell migration involved in heart development	0.00657801946739256	0.0433943721739553	0.0343182199844888	BVES/TBX5	2	16.3376623376623
BP	GO:1901018	positive regulation of potassium ion transmembrane transporter activity	0.00657801946739256	0.0433943721739553	0.0343182199844888	ANK2/NPPA	2	16.3376623376623
BP	GO:2000738	positive regulation of stem cell differentiation	0.00657801946739256	0.0433943721739553	0.0343182199844888	NKX2-5/TBX5	2	16.3376623376623
BP	GO:0007389	pattern specification process	0.00664851973453166	0.0437228198118266	0.0345779711394235	EGR2/GATA4/GATA5/TLL1/CITED2/NKX2-5/TBX5/TBX20	8	2.88918660287081
BP	GO:0001763	morphogenesis of a branching structure	0.00674764659981218	0.0441616553317908	0.0349250219931787	MAGED1/CAV3/GRB2/COL13A1/TBX20	5	4.22525750111957
BP	GO:0030837	negative regulation of actin filament polymerization	0.00675708890202199	0.0441616553317908	0.0349250219931787	SPTA1/SPTB/SVIL	3	7.79752066115702
BP	GO:0010611	regulation of cardiac muscle hypertrophy	0.00704421807415328	0.0457549057062694	0.0361850360019663	CAV3/GATA5/MLIP	3	7.68113975576662
BP	GO:0048645	animal organ formation	0.00704421807415328	0.0457549057062694	0.0361850360019663	GATA5/CITED2/TBX5	3	7.68113975576662
BP	GO:0014902	myotube differentiation	0.0070772203566501	0.0458282581990441	0.036243046450265	CAV3/NKX2-5/ACTA1/RYR1	4	5.27832167832168
BP	GO:0003085	negative regulation of systemic arterial blood pressure	0.0072084421464394	0.0463933578388219	0.0366899526452275	GPR37L1/NPPA	2	15.595041322314
BP	GO:0032042	mitochondrial DNA metabolic process	0.0072084421464394	0.0463933578388219	0.0366899526452275	DNA2/RRM2B	2	15.595041322314
BP	GO:0051926	negative regulation of calcium ion transport	0.0073384977833201	0.0470868353209384	0.0372383858081769	TRDN/CAV3/CALM2	3	7.56818181818182
BP	GO:0007368	determination of left/right symmetry	0.00765958121741367	0.0489981089392735	0.0387499068925617	GATA4/CITED2/NKX2-5/TBX20	4	5.15926179084074
BP	GO:1902903	regulation of supramolecular fiber organization	0.00776966782781534	0.0495521715544356	0.0391880845123712	CAV3/CSF3/GRB2/SPTA1/SPTB/SVIL/GIT1	7	3.08693620004674
BP	GO:0014743	regulation of muscle hypertrophy	0.00794867362493299	0.0502384731204597	0.0397308426383351	CAV3/GATA5/MLIP	3	7.35194805194805
BP	GO:0071479	cellular response to ionizing radiation	0.00794867362493299	0.0502384731204597	0.0397308426383351	EGR1/ELK1/GRB2	3	7.35194805194805
BP	GO:1901880	negative regulation of protein depolymerization	0.00794867362493299	0.0502384731204597	0.0397308426383351	SPTA1/SPTB/SVIL	3	7.35194805194805
BP	GO:0016051	carbohydrate biosynthetic process	0.00837756520046894	0.0527911645916117	0.041749625790868	PCK1/PHKG2/PGM1/PGK1/ENO3	5	4.00807136788445
BP	GO:0003148	outflow tract septum morphogenesis	0.00854767320235666	0.0535434365880561	0.0423445562984153	NKX2-5/TBX20	2	14.2954545454545
BP	GO:0061615	glycolytic process through fructose-6-phosphate	0.00854767320235666	0.0535434365880561	0.0423445562984153	PGK1/ENO3	2	14.2954545454545
BP	GO:0060972	left/right pattern formation	0.00891712913515238	0.0555370998492114	0.0439212348155523	GATA4/CITED2/NKX2-5/TBX20	4	4.93655984303466
BP	GO:0035914	skeletal muscle cell differentiation	0.00891855843149345	0.0555370998492114	0.0439212348155523	EGR1/EGR2/CITED2	3	7.04981320049813
BP	GO:0050927	positive regulation of positive chemotaxis	0.00925584123290003	0.0572993573098298	0.0453149072245082	SCG2/IL16	2	13.7236363636364
BP	GO:0070129	regulation of mitochondrial translation	0.00925584123290003	0.0572993573098298	0.0453149072245082	C1QBP/COA3	2	13.7236363636364
BP	GO:0009799	specification of symmetry	0.00982625456658182	0.060475869941849	0.0478270361902678	GATA4/CITED2/NKX2-5/TBX20	4	4.79847425301971
BP	GO:0009855	determination of bilateral symmetry	0.00982625456658182	0.060475869941849	0.0478270361902678	GATA4/CITED2/NKX2-5/TBX20	4	4.79847425301971
BP	GO:0002026	regulation of the force of heart contraction	0.00998928867631402	0.0605959436658014	0.0479219958881852	GAA/MYH6	2	13.1958041958042
BP	GO:0003181	atrioventricular valve morphogenesis	0.00998928867631402	0.0605959436658014	0.0479219958881852	GATA4/TBX5	2	13.1958041958042
BP	GO:0050926	regulation of positive chemotaxis	0.00998928867631402	0.0605959436658014	0.0479219958881852	SCG2/IL16	2	13.1958041958042
BP	GO:0060343	trabecula formation	0.00998928867631402	0.0605959436658014	0.0479219958881852	CAV3/NKX2-5	2	13.1958041958042
BP	GO:1901017	negative regulation of potassium ion transmembrane transporter activity	0.00998928867631402	0.0605959436658014	0.0479219958881852	KCNE1/CAV3	2	13.1958041958042
BP	GO:0035296	regulation of tube diameter	0.0105462505027618	0.0636089566038002	0.050304821947008	COMP/SNTA1/KCNA5/NPPA	4	4.69987546699875
BP	GO:0097746	blood vessel diameter maintenance	0.0105462505027618	0.0636089566038002	0.050304821947008	COMP/SNTA1/KCNA5/NPPA	4	4.69987546699875
BP	GO:0006007	glucose catabolic process	0.0107477022908224	0.0639109846082426	0.0505436792683302	PGK1/ENO3	2	12.7070707070707
BP	GO:0009065	glutamine family amino acid catabolic process	0.0107477022908224	0.0639109846082426	0.0505436792683302	GAD1/ALDH4A1	2	12.7070707070707
BP	GO:0010460	positive regulation of heart rate	0.0107477022908224	0.0639109846082426	0.0505436792683302	SCN3B/NPPA	2	12.7070707070707
BP	GO:0071467	cellular response to pH	0.0107477022908224	0.0639109846082426	0.0505436792683302	PCK1/KCNE1	2	12.7070707070707
BP	GO:0071480	cellular response to gamma radiation	0.0107477022908224	0.0639109846082426	0.0505436792683302	EGR1/ELK1	2	12.7070707070707
BP	GO:0035150	regulation of tube size	0.0107936287847949	0.0640037931592751	0.0506170764420007	COMP/SNTA1/KCNA5/NPPA	4	4.66790352504638
BP	GO:0032272	negative regulation of protein polymerization	0.011441298955387	0.067465313114028	0.0533546020089498	SPTA1/SPTB/SVIL	3	6.43295454545455
BP	GO:0043242	negative regulation of protein-containing complex disassembly	0.011441298955387	0.067465313114028	0.0533546020089498	SPTA1/SPTB/SVIL	3	6.43295454545455
BP	GO:0003156	regulation of animal organ formation	0.011530771569418	0.0675881843308776	0.0534517740899907	GATA5/CITED2	2	12.2532467532468
BP	GO:0060575	intestinal epithelial cell differentiation	0.011530771569418	0.0675881843308776	0.0534517740899907	GATA4/GATA5	2	12.2532467532468
BP	GO:0007612	learning	0.0115581878462562	0.0675881843308776	0.0534517740899907	NTRK2/NPTX2/GIT1/SLC6A1	4	4.57454545454545
BP	GO:0007422	peripheral nervous system development	0.0118318041512119	0.0689970678541667	0.0545659825060252	EGR2/NTRK2/CITED2	3	6.35353535353535
BP	GO:0046390	ribose phosphate biosynthetic process	0.0122126122407529	0.0710215549317611	0.0561670378826564	AMPD1/ALDOA/PYGL/ATP5F1E/NPPA	5	3.64990328820116
BP	GO:0010447	response to acidic pH	0.0123381887190992	0.0715547153462043	0.0565886851026353	PCK1/KCNE1	2	11.8307210031348
BP	GO:0042310	vasoconstriction	0.0126356554484333	0.0730790921962813	0.0577942308326321	COMP/SNTA1/KCNA5	3	6.20043811610077
BP	GO:0003002	regionalization	0.0129908610178936	0.0743345675924384	0.0587871172064162	EGR2/GATA4/GATA5/TLL1/CITED2/NKX2-5/TBX20	7	2.79260042283298
BP	GO:1904427	positive regulation of calcium ion transmembrane transport	0.0130490458512907	0.0743345675924384	0.0587871172064162	ANK2/TRDN/CALM2	3	6.12662337662338
BP	GO:0000002	mitochondrial genome maintenance	0.013169648640252	0.0743345675924384	0.0587871172064162	DNA2/RRM2B	2	11.4363636363636
BP	GO:0003298	physiological muscle hypertrophy	0.013169648640252	0.0743345675924384	0.0587871172064162	CAV3/GATA4	2	11.4363636363636
BP	GO:0003301	physiological cardiac muscle hypertrophy	0.013169648640252	0.0743345675924384	0.0587871172064162	CAV3/GATA4	2	11.4363636363636
BP	GO:0021602	cranial nerve morphogenesis	0.013169648640252	0.0743345675924384	0.0587871172064162	EGR2/CITED2	2	11.4363636363636
BP	GO:0060045	positive regulation of cardiac muscle cell proliferation	0.013169648640252	0.0743345675924384	0.0587871172064162	TBX5/TBX20	2	11.4363636363636
BP	GO:0061049	cell growth involved in cardiac muscle cell development	0.013169648640252	0.0743345675924384	0.0587871172064162	CAV3/GATA4	2	11.4363636363636
BP	GO:0062125	regulation of mitochondrial gene expression	0.013169648640252	0.0743345675924384	0.0587871172064162	C1QBP/COA3	2	11.4363636363636
BP	GO:0051591	response to cAMP	0.0134701069581202	0.0756555851953244	0.0598318373032409	PCK1/VGF/KCNE1	3	6.05454545454545
BP	GO:0030902	hindbrain development	0.0134754604710108	0.0756555851953244	0.0598318373032409	EGR2/KCNE1/SCN5A/GPR37L1	4	4.37058482918356
BP	GO:0045787	positive regulation of cell cycle	0.0135470446252168	0.0756555851953244	0.0598318373032409	TERT/SVIL/KCNA5/CITED2/RRM2B/TBX20	6	3.08165487207403
BP	GO:0060562	epithelial tube morphogenesis	0.0135470446252168	0.0756555851953244	0.0598318373032409	MAGED1/CAV3/GATA4/CITED2/NKX2-5/TBX20	6	3.08165487207403
BP	GO:0070918	regulatory ncRNA processing	0.0138988579450559	0.0772118134789816	0.0610625725785559	PARN/TERT/NUP155	3	5.98414376321353
BP	GO:1901879	regulation of protein depolymerization	0.0138988579450559	0.0772118134789816	0.0610625725785559	SPTA1/SPTB/SVIL	3	5.98414376321353
BP	GO:0010667	negative regulation of cardiac muscle cell apoptotic process	0.0140248489061775	0.0773014518040226	0.0611334625950185	GATA4/NKX2-5	2	11.0674486803519
BP	GO:0043094	cellular metabolic compound salvage	0.0140248489061775	0.0773014518040226	0.0611334625950185	TK2/AMPD1	2	11.0674486803519
BP	GO:0050999	regulation of nitric-oxide synthase activity	0.0140248489061775	0.0773014518040226	0.0611334625950185	CAV3/TERT	2	11.0674486803519
BP	GO:0032956	regulation of actin cytoskeleton organization	0.0141025118638621	0.0775270899599295	0.0613119073905848	CAV3/CSF3/GRB2/SPTA1/SPTB/SVIL	6	3.05422174264904
BP	GO:0033002	muscle cell proliferation	0.014867786619907	0.0810857392963167	0.0641262472382549	TERT/CITED2/NKX2-5/TBX5/TBX20	5	3.47258005152742
BP	GO:0031116	positive regulation of microtubule polymerization	0.0149034897427621	0.0810857392963167	0.0641262472382549	CAV3/GIT1	2	10.7215909090909
BP	GO:0061384	heart trabecula morphogenesis	0.0149034897427621	0.0810857392963167	0.0641262472382549	CAV3/NKX2-5	2	10.7215909090909
BP	GO:1901020	negative regulation of calcium ion transmembrane transporter activity	0.0149034897427621	0.0810857392963167	0.0641262472382549	TRDN/CALM2	2	10.7215909090909
BP	GO:0051896	regulation of phosphatidylinositol 3-kinase/protein kinase B signal transduction	0.0151051602578894	0.0819717051527106	0.0648269088594575	NTRK2/CAV3/CSF3/GATA4/C1QBP	5	3.45857771260997
BP	GO:0051494	negative regulation of cytoskeleton organization	0.0152711723760461	0.0826601150918802	0.0653713343816709	CAV3/SPTA1/SPTB/SVIL	4	4.20970440602342
BP	GO:0006536	glutamate metabolic process	0.0158052740082916	0.0841874823159559	0.0665792450338358	GAD1/ALDH4A1	2	10.396694214876
BP	GO:0010664	negative regulation of striated muscle cell apoptotic process	0.0158052740082916	0.0841874823159559	0.0665792450338358	GATA4/NKX2-5	2	10.396694214876
BP	GO:0035115	embryonic forelimb morphogenesis	0.0158052740082916	0.0841874823159559	0.0665792450338358	CACNA1C/TBX5	2	10.396694214876
BP	GO:0043618	regulation of transcription from RNA polymerase II promoter in response to stress	0.0158052740082916	0.0841874823159559	0.0665792450338358	EGR1/CITED2	2	10.396694214876
BP	GO:0060914	heart formation	0.0158052740082916	0.0841874823159559	0.0665792450338358	GATA5/TBX5	2	10.396694214876
BP	GO:1905207	regulation of cardiocyte differentiation	0.0158052740082916	0.0841874823159559	0.0665792450338358	NKX2-5/TBX5	2	10.396694214876
BP	GO:0042593	glucose homeostasis	0.0158325108855682	0.0841874823159559	0.0665792450338358	PCK1/VGF/CAV3/GATA4/PYGL	5	3.41724013038754
BP	GO:0033500	carbohydrate homeostasis	0.0160800738624321	0.085289034983905	0.0674504023957084	PCK1/VGF/CAV3/GATA4/PYGL	5	3.40367965367965
BP	GO:0030509	BMP signaling pathway	0.0165483481682286	0.0873339074578262	0.0690675794600276	COMP/EGR1/GATA4/TBX20	4	4.10887316276538
BP	GO:1902904	negative regulation of supramolecular fiber organization	0.0165483481682286	0.0873339074578262	0.0690675794600276	CAV3/SPTA1/SPTB/SVIL	4	4.10887316276538
BP	GO:0090075	relaxation of muscle	0.0167299071734061	0.0880719053442899	0.0696512213598164	KCNJ2/KBTBD13	2	10.0909090909091
BP	GO:0032465	regulation of cytokinesis	0.0171168028039926	0.0898845042766874	0.0710847060673795	SVIL/CALM2/GIT1	3	5.53372434017595
BP	GO:0043648	dicarboxylic acid metabolic process	0.0176076273808425	0.0921391417353722	0.0728677747100653	PCK1/GAD1/ALDH4A1	3	5.47485493230174
BP	GO:0046471	phosphatidylglycerol metabolic process	0.0176770973011965	0.0921391417353722	0.0728677747100653	HADHA/ABCA3	2	9.8025974025974
BP	GO:1901385	regulation of voltage-gated calcium channel activity	0.0176770973011965	0.0921391417353722	0.0728677747100653	DMD/NPPA	2	9.8025974025974
BP	GO:0031112	positive regulation of microtubule polymerization or depolymerization	0.0186465550274408	0.0960428041443076	0.0759549664029878	CAV3/GIT1	2	9.53030303030303
BP	GO:0055023	positive regulation of cardiac muscle tissue growth	0.0186465550274408	0.0960428041443076	0.0759549664029878	TBX5/TBX20	2	9.53030303030303
BP	GO:2000352	negative regulation of endothelial cell apoptotic process	0.0186465550274408	0.0960428041443076	0.0759549664029878	TERT/SCG2	2	9.53030303030303
BP	GO:0010038	response to metal ion	0.0186705642836829	0.0960428041443076	0.0759549664029878	SCN5A/TERT/CALM2/TTN/SLC6A1/RYR1	6	2.86705495062041
BP	GO:0048762	mesenchymal cell differentiation	0.0186990016595502	0.0960428041443076	0.0759549664029878	GATA5/CITED2/TBX5/TBX20/NRTN	5	3.27376821651631
BP	GO:0090068	positive regulation of cell cycle process	0.0186990016595502	0.0960428041443076	0.0759549664029878	TERT/SVIL/KCNA5/RRM2B/TBX20	5	3.27376821651631
BP	GO:0021675	nerve development	0.0191270064806459	0.0980026958268045	0.0775049368377731	EGR2/CITED2/NRTN	3	5.30552952202437
BP	GO:1902905	positive regulation of supramolecular fiber organization	0.0192991462701345	0.0986452730659901	0.078013115800773	CAV3/CSF3/GRB2/GIT1	4	3.92103896103896
BP	GO:0022616	DNA strand elongation	0.0196379935409792	0.0999501305617295	0.0790450557585096	DNA2/TERT	2	9.27272727272727
BP	GO:1901992	positive regulation of mitotic cell cycle phase transition	0.0196491256196673	0.0999501305617295	0.0790450557585096	TERT/KCNA5/RRM2B	3	5.25139146567718
BP	GO:0048536	spleen development	0.0206511285642278	0.104543243163273	0.0826774956528216	CITED2/NKX2-5	2	9.02870813397129
BP	GO:0048741	skeletal muscle fiber development	0.0206511285642278	0.104543243163273	0.0826774956528216	ACTA1/RYR1	2	9.02870813397129
BP	GO:0060349	bone morphogenesis	0.0207168865032653	0.104625233034433	0.0827423369281761	COMP/CITED2/COL13A1	3	5.14636363636364
BP	GO:0009306	protein secretion	0.0208019198069765	0.104803944421306	0.0828836699255489	COMP/CAVIN1/VGF/SCG2/KCNA5/TTN	6	2.79693675889328
BP	GO:0035592	establishment of protein localization to extracellular region	0.0210485251976997	0.105793896886533	0.0836665688309567	COMP/CAVIN1/VGF/SCG2/KCNA5/TTN	6	2.78935698447894
BP	GO:0032535	regulation of cellular component size	0.0212971127359864	0.106789085476644	0.0844536086992733	CAV3/CSF3/GRB2/SPTA1/SPTB/SVIL	6	2.78181818181818
BP	GO:0071478	cellular response to radiation	0.0215375334646447	0.107738704132381	0.085204609815232	EGR1/KCNE1/ELK1/GRB2	4	3.79105976896032
BP	GO:0014037	Schwann cell differentiation	0.0216856783338288	0.107968082459228	0.0853860125060885	EGR2/NTRK2	2	8.7972027972028
BP	GO:0043620	regulation of DNA-templated transcription in response to stress	0.0216856783338288	0.107968082459228	0.0853860125060885	EGR1/CITED2	2	8.7972027972028
BP	GO:0110053	regulation of actin filament organization	0.0218891365516406	0.108724628848267	0.0859843233954231	CSF3/GRB2/SPTA1/SPTB/SVIL	5	3.14185814185814
BP	GO:0007611	learning or memory	0.0221956277539442	0.10998819293093	0.0869836066660624	EGR2/NTRK2/NPTX2/GIT1/SLC6A1	5	3.13039150630392
BP	GO:0044282	small molecule catabolic process	0.0225700103648668	0.111385193782864	0.0880884177314931	PCK1/HADHA/PGK1/GAD1/ALDH4A1/ENO3	6	2.74472727272727
BP	GO:0009141	nucleoside triphosphate metabolic process	0.0227139900350981	0.111385193782864	0.0880884177314931	ALDOA/ATP5F1E/MYH6/RRM2B	4	3.72924901185771
BP	GO:0051495	positive regulation of cytoskeleton organization	0.0227139900350981	0.111385193782864	0.0880884177314931	CAV3/CSF3/GRB2/GIT1	4	3.72924901185771
BP	GO:0051349	positive regulation of lyase activity	0.0227413635814375	0.111385193782864	0.0880884177314931	ISCU/CACNA1C	2	8.57727272727273
BP	GO:0060421	positive regulation of heart growth	0.0227413635814375	0.111385193782864	0.0880884177314931	TBX5/TBX20	2	8.57727272727273
BP	GO:0090100	positive regulation of transmembrane receptor protein serine/threonine kinase signaling pathway	0.0229465881868256	0.112130202922196	0.0886776044451886	GATA4/CITED2/TBX20	3	4.94842657342657
BP	GO:0071692	protein localization to extracellular region	0.0230932702117611	0.11258635893078	0.0890383531198567	COMP/CAVIN1/VGF/SCG2/KCNA5/TTN	6	2.7301663853388
BP	GO:0010586	miRNA metabolic process	0.0235236423321106	0.114420297149967	0.0904887138945608	EGR1/PARN/TERT	3	4.9012987012987
BP	GO:0003203	endocardial cushion morphogenesis	0.0238179075146444	0.114793613615101	0.090783949334838	GATA5/TBX20	2	8.36807095343681
BP	GO:0035136	forelimb morphogenesis	0.0238179075146444	0.114793613615101	0.090783949334838	CACNA1C/TBX5	2	8.36807095343681
BP	GO:0051154	negative regulation of striated muscle cell differentiation	0.0238179075146444	0.114793613615101	0.090783949334838	CAV3/NKX2-5	2	8.36807095343681
BP	GO:0051281	positive regulation of release of sequestered calcium ion into cytosol	0.0238179075146444	0.114793613615101	0.090783949334838	TRDN/CALM2	2	8.36807095343681
BP	GO:0008217	regulation of blood pressure	0.0239290053522213	0.114804841587589	0.0907928289201508	ABCC9/GPR37L1/NPPA/MYH6	4	3.66942148760331
BP	GO:0061138	morphogenesis of a branching epithelium	0.0239290053522213	0.114804841587589	0.0907928289201508	MAGED1/CAV3/GRB2/TBX20	4	3.66942148760331
BP	GO:0006641	triglyceride metabolic process	0.0241085470972235	0.115403952204623	0.0912666325246366	PNPLA2/PCK1/CAV3	3	4.85506003430532
BP	GO:0050804	modulation of chemical synaptic transmission	0.0243870713882262	0.116473094345126	0.0921121581846317	VGF/EGR2/NTRK2/SYN1/GIT1/SLC6A1/GABRR1	7	2.45566090351366
BP	GO:0099177	regulation of trans-synaptic signaling	0.0246252333180815	0.117345073441242	0.0928017584471362	VGF/EGR2/NTRK2/SYN1/GIT1/SLC6A1/GABRR1	7	2.45064935064935
BP	GO:0009268	response to pH	0.0249150357980322	0.117663625435449	0.0930536836822772	PCK1/KCNE1	2	8.16883116883117
BP	GO:0014904	myotube cell development	0.0249150357980322	0.117663625435449	0.0930536836822772	ACTA1/RYR1	2	8.16883116883117
BP	GO:0030513	positive regulation of BMP signaling pathway	0.0249150357980322	0.117663625435449	0.0930536836822772	GATA4/TBX20	2	8.16883116883117
BP	GO:0030851	granulocyte differentiation	0.0249150357980322	0.117663625435449	0.0930536836822772	CSF3/CITED2	2	8.16883116883117
BP	GO:0009124	nucleoside monophosphate biosynthetic process	0.0260324765343651	0.122393224864242	0.096794063494322	TK2/AMPD1	2	7.97885835095137
BP	GO:0060412	ventricular septum morphogenesis	0.0260324765343651	0.122393224864242	0.096794063494322	CITED2/NKX2-5	2	7.97885835095137
BP	GO:0045165	cell fate commitment	0.0260930301117316	0.122405303479701	0.0968036158063304	GATA4/GATA5/NKX2-5/TBX5/TBX20	5	2.99904640813732
BP	GO:0090398	cellular senescence	0.0265266205104781	0.124163405537958	0.0981940019363245	COMP/TERT/CITED2	3	4.67851239669421
BP	GO:0046486	glycerolipid metabolic process	0.026694860277185	0.124674447002517	0.0985981564965427	PNPLA2/PCK1/HADHA/CAV3/ABCA3/DPM3	6	2.63916083916084
BP	GO:0071897	DNA biosynthetic process	0.0269154104996448	0.125427001246689	0.0991933102182798	TK2/PARN/TERT/RRM2B	4	3.53701968134958
BP	GO:0007622	rhythmic behavior	0.0271699602459127	0.125780232629653	0.0994726614728014	EGR1/EGR2	2	7.79752066115702
BP	GO:0019320	hexose catabolic process	0.0271699602459127	0.125780232629653	0.0994726614728014	PGK1/ENO3	2	7.79752066115702
BP	GO:2000300	regulation of synaptic vesicle exocytosis	0.0271699602459127	0.125780232629653	0.0994726614728014	SYN1/GIT1	2	7.79752066115702
BP	GO:0043491	phosphatidylinositol 3-kinase/protein kinase B signal transduction	0.0274836203813073	0.12695387882919	0.100400833639879	NTRK2/CAV3/CSF3/GATA4/C1QBP	5	2.9576802507837
BP	GO:0019693	ribose phosphate metabolic process	0.027576170638947	0.127103266853313	0.100518976403976	AMPD1/ALDOA/PYGL/ATP5F1E/NPPA/MYH6	6	2.61901457321305
BP	GO:0018198	peptidyl-cysteine modification	0.028327219855904	0.130280525306783	0.103031695198862	DMD/SNTA1	2	7.62424242424242
BP	GO:1904035	regulation of epithelial cell apoptotic process	0.0284224278481939	0.13043422866856	0.10315325072594	TERT/SCG2/NKX2-5	3	4.55430410297667
BP	GO:0032768	regulation of monooxygenase activity	0.029503990670113	0.135103957276808	0.106846282002053	CAV3/TERT	2	7.45849802371541
BP	GO:0048640	negative regulation of developmental growth	0.0297253702848357	0.13552971203302	0.107182987999885	CAV3/CITED2/TBX5	3	4.47509881422925
BP	GO:0051261	protein depolymerization	0.0297253702848357	0.13552971203302	0.107182987999885	SPTA1/SPTB/SVIL	3	4.47509881422925
BP	GO:0007626	locomotory behavior	0.0301159558291345	0.137014618007119	0.10835731838704	EGR1/GAD1/GAA/GIT1	4	3.41383989145183
BP	GO:0010830	regulation of myotube differentiation	0.0307000103585743	0.139072364521353	0.109984676821095	CAV3/NKX2-5	2	7.29980657640232
BP	GO:0061383	trabecula morphogenesis	0.0307000103585743	0.139072364521353	0.109984676821095	CAV3/NKX2-5	2	7.29980657640232
BP	GO:0051928	positive regulation of calcium ion transport	0.0317382150099379	0.143467605751561	0.113460631141128	ANK2/TRDN/CALM2	3	4.3613251155624
BP	GO:0042181	ketone biosynthetic process	0.031915018937428	0.143958557642971	0.113848897963924	EGR1/COQ8A	2	7.14772727272727
BP	GO:1901989	positive regulation of cell cycle phase transition	0.0324247031935708	0.145945732284921	0.115420444989346	TERT/KCNA5/RRM2B	3	4.32467532467532
BP	GO:0001933	negative regulation of protein phosphorylation	0.032719486877241	0.14695922722948	0.116221962345586	DMD/CAV3/DUSP6/CALM2/NPPA	5	2.82147129186603
BP	GO:0007178	transmembrane receptor protein serine/threonine kinase signaling pathway	0.0329357934781695	0.147616687966913	0.116741911847976	COMP/EGR1/CAV3/GATA4/CITED2/TBX20	6	2.51042128603104
BP	GO:0035987	endodermal cell differentiation	0.0331487587508921	0.147942980387174	0.116999958559953	COL12A1/GRB2	2	7.00185528756957
BP	GO:1903170	negative regulation of calcium ion transmembrane transport	0.0331487587508921	0.147942980387174	0.116999958559953	TRDN/CALM2	2	7.00185528756957
BP	GO:0010656	negative regulation of muscle cell apoptotic process	0.0344009744533636	0.152244144803041	0.120401512706686	GATA4/NKX2-5	2	6.86181818181818
BP	GO:0010665	regulation of cardiac muscle cell apoptotic process	0.0344009744533636	0.152244144803041	0.120401512706686	GATA4/NKX2-5	2	6.86181818181818
BP	GO:0060976	coronary vasculature development	0.0344009744533636	0.152244144803041	0.120401512706686	ABCC9/TBX5	2	6.86181818181818
BP	GO:0071320	cellular response to cAMP	0.0344009744533636	0.152244144803041	0.120401512706686	PCK1/KCNE1	2	6.86181818181818
BP	GO:0019722	calcium-mediated signaling	0.0345490658599267	0.152579661151266	0.120666854115489	ANK2/DMD/CALM2/CACNA1C	4	3.26753246753247
BP	GO:0019932	second-messenger-mediated signaling	0.0351418908138438	0.154873760977086	0.122481131371841	ANK2/DMD/CALM2/CACNA1C/NPPA	5	2.76686217008798
BP	GO:0043244	regulation of protein-containing complex disassembly	0.0352480307490099	0.15501790189825	0.122595124491074	SPTA1/SPTB/SVIL	3	4.1840354767184
BP	GO:0010332	response to gamma radiation	0.0356714129916449	0.155262583145077	0.12278862941888	EGR1/ELK1	2	6.72727272727273
BP	GO:0043407	negative regulation of MAP kinase activity	0.0356714129916449	0.155262583145077	0.12278862941888	CAV3/NPPA	2	6.72727272727273
BP	GO:0046460	neutral lipid biosynthetic process	0.0356714129916449	0.155262583145077	0.12278862941888	PNPLA2/PCK1	2	6.72727272727273
BP	GO:0046463	acylglycerol biosynthetic process	0.0356714129916449	0.155262583145077	0.12278862941888	PNPLA2/PCK1	2	6.72727272727273
BP	GO:0046622	positive regulation of organ growth	0.0356714129916449	0.155262583145077	0.12278862941888	TBX5/TBX20	2	6.72727272727273
BP	GO:0009152	purine ribonucleotide biosynthetic process	0.036106823713768	0.156834372139432	0.12403167080363	AMPD1/ALDOA/ATP5F1E/NPPA	4	3.22151088348271
BP	GO:0010662	regulation of striated muscle cell apoptotic process	0.0369598235872971	0.158581682099155	0.125413522057024	GATA4/NKX2-5	2	6.5979020979021
BP	GO:0030838	positive regulation of actin filament polymerization	0.0369598235872971	0.158581682099155	0.125413522057024	CSF3/GRB2	2	6.5979020979021
BP	GO:0046365	monosaccharide catabolic process	0.0369598235872971	0.158581682099155	0.125413522057024	PGK1/ENO3	2	6.5979020979021
BP	GO:0060688	regulation of morphogenesis of a branching structure	0.0369598235872971	0.158581682099155	0.125413522057024	MAGED1/CAV3	2	6.5979020979021
BP	GO:1900087	positive regulation of G1/S transition of mitotic cell cycle	0.0369598235872971	0.158581682099155	0.125413522057024	TERT/KCNA5	2	6.5979020979021
BP	GO:1902895	positive regulation of miRNA transcription	0.0369598235872971	0.158581682099155	0.125413522057024	EGR1/TERT	2	6.5979020979021
BP	GO:0060348	bone development	0.0371676423651461	0.159149884447918	0.125862882013711	COMP/CITED2/COL13A1/RYR1	4	3.19154334038055
BP	GO:0050890	cognition	0.0381054380698631	0.1628351817115	0.128777380734717	EGR2/NTRK2/NPTX2/GIT1/SLC6A1	5	2.70576426727846
BP	GO:0001704	formation of primary germ layer	0.0389502061497355	0.165773962060669	0.131101500325723	COL12A1/GRB2/TBX20	3	4.02059659090909
BP	GO:0045931	positive regulation of mitotic cell cycle	0.0389502061497355	0.165773962060669	0.131101500325723	TERT/KCNA5/RRM2B	3	4.02059659090909
BP	GO:0010659	cardiac muscle cell apoptotic process	0.039589569105739	0.168156097348521	0.132985399982425	GATA4/NKX2-5	2	6.35353535353535
BP	GO:0043434	response to peptide hormone	0.0400600199497312	0.169812654847154	0.134295480110492	EGR1/PCK1/VGF/EGR2/HADHA/GRB2	6	2.39365750528541
BP	GO:0032612	interleukin-1 production	0.0404844856566782	0.170925498442495	0.135175566845246	EGR1/GIT1/IL16	3	3.95874125874126
BP	GO:0032652	regulation of interleukin-1 production	0.0404844856566782	0.170925498442495	0.135175566845246	EGR1/GIT1/IL16	3	3.95874125874126
BP	GO:0009410	response to xenobiotic stimulus	0.0415937728349086	0.175258392124735	0.138602213921977	ABCC9/HADHA/DUSP6/GATA4/KCNH2/ABCA3	6	2.37159614578969
BP	GO:0010658	striated muscle cell apoptotic process	0.042288249613588	0.177476133070147	0.140356103143561	GATA4/NKX2-5	2	6.12662337662338
BP	GO:0048168	regulation of neuronal synaptic plasticity	0.042288249613588	0.177476133070147	0.140356103143561	VGF/EGR2	2	6.12662337662338
BP	GO:0042326	negative regulation of phosphorylation	0.0425984164479441	0.178423129209544	0.141105030255721	DMD/CAV3/DUSP6/CALM2/NPPA	5	2.62301918265221
BP	GO:0031400	negative regulation of protein modification process	0.0427682388650531	0.178779707414113	0.1413870283272	DMD/CAV3/DUSP6/SNTA1/CALM2/NPPA	6	2.35531516538382
BP	GO:0006639	acylglycerol metabolic process	0.0436437876225373	0.182079121879795	0.143996353587153	PNPLA2/PCK1/CAV3	3	3.84056987788331
BP	GO:0006638	neutral lipid metabolic process	0.0444523997375117	0.184916154214232	0.146240006274787	PNPLA2/PCK1/CAV3	3	3.81212121212121
BP	GO:0009260	ribonucleotide biosynthetic process	0.0444990082145096	0.184916154214232	0.146240006274787	AMPD1/ALDOA/ATP5F1E/NPPA	4	3.00956937799043
BP	GO:0051339	regulation of lyase activity	0.0450539390032716	0.186854352133411	0.14777282030646	ISCU/CACNA1C	2	5.9153605015674
BP	GO:0098781	ncRNA transcription	0.0452684838125893	0.187376018290933	0.148185377351428	EGR1/CAVIN1/TERT	3	3.78409090909091
BP	GO:0009743	response to carbohydrate	0.0456940281914855	0.188767306286156	0.149285670432992	EGR1/PCK1/GATA4/SLC6A1	4	2.98339920948617
BP	GO:0046034	ATP metabolic process	0.0460920175811226	0.190039549050292	0.150291817195025	ALDOA/ATP5F1E/MYH6	3	3.7564698075647
BP	GO:0031122	cytoplasmic microtubule organization	0.0464613196353128	0.190816820525574	0.150906518414102	TRDN/CAV3	2	5.81510015408321
BP	GO:0051480	regulation of cytosolic calcium ion concentration	0.0464613196353128	0.190816820525574	0.150906518414102	CAV3/RYR1	2	5.81510015408321
BP	GO:0009581	detection of external stimulus	0.0469229782649861	0.191594597905968	0.15152161972568	CAV3/TTN/PIEZO2	3	3.72924901185771
BP	GO:0010212	response to ionizing radiation	0.0469229782649861	0.191594597905968	0.15152161972568	EGR1/ELK1/GRB2	3	3.72924901185771
BP	GO:0033135	regulation of peptidyl-serine phosphorylation	0.0469229782649861	0.191594597905968	0.15152161972568	DMD/NTRK2/CSF3	3	3.72924901185771
BP	GO:0008406	gonad development	0.0475200822164306	0.193658095673523	0.153153526509366	VGF/KCNE1/GATA4/CITED2	4	2.94498634412797
BP	GO:0043467	regulation of generation of precursor metabolites and energy	0.0477613425840265	0.194266270125009	0.153634498201533	PHKG2/ISCU/GIT1	3	3.70242
BP	GO:0008360	regulation of cell shape	0.0486070867654064	0.197326077234179	0.156054331194199	SPTA1/ALDOA/BVES	3	3.67597402597403
BP	GO:0031113	regulation of microtubule polymerization	0.0493239867529314	0.198707893197401	0.157147133367114	CAV3/GIT1	2	5.62444113263785
BP	GO:0032092	positive regulation of protein binding	0.0493239867529314	0.198707893197401	0.157147133367114	CSF3/TERT	2	5.62444113263785
BP	GO:0060350	endochondral bone morphogenesis	0.0493239867529314	0.198707893197401	0.157147133367114	COMP/COL13A1	2	5.62444113263785
BP	GO:2000351	regulation of endothelial cell apoptotic process	0.0493239867529314	0.198707893197401	0.157147133367114	TERT/SCG2	2	5.62444113263785
BP	GO:0009582	detection of abiotic stimulus	0.0494601865528424	0.198877054882001	0.157280914030693	CAV3/TTN/PIEZO2	3	3.64990328820116
CC	GO:0030016	myofibril	1.6343026132425e-19	3.59546574913351e-17	2.70090010820077e-17	TPM3/ANK2/DMD/ABCC9/KCNE1/SCN3B/SCN5A/CAV3/ALDOA/SVIL/CALM2/KCNA5/OBSCN/TTN/TPM2/CACNA1C/ACTA1/MYH6/ACTC1/RYR1/MYPN	21	15.7992584745763
CC	GO:0043292	contractile fiber	3.56821904752796e-19	3.92504095228075e-17	2.9484757392731e-17	TPM3/ANK2/DMD/ABCC9/KCNE1/SCN3B/SCN5A/CAV3/ALDOA/SVIL/CALM2/KCNA5/OBSCN/TTN/TPM2/CACNA1C/ACTA1/MYH6/ACTC1/RYR1/MYPN	21	15.2188775510204
CC	GO:0030017	sarcomere	5.82280523771541e-19	4.27005717432463e-17	3.20765060463621e-17	TPM3/ANK2/DMD/ABCC9/KCNE1/SCN3B/SCN5A/CAV3/ALDOA/CALM2/KCNA5/OBSCN/TTN/TPM2/CACNA1C/ACTA1/MYH6/ACTC1/RYR1/MYPN	20	16.4401455026455
CC	GO:0031674	I band	3.98583277293203e-15	2.19220802511262e-13	1.64677827723771e-13	ANK2/DMD/KCNE1/SCN3B/SCN5A/CAV3/ALDOA/KCNA5/OBSCN/TTN/CACNA1C/MYH6/ACTC1/RYR1/MYPN	15	18.2418052837573
CC	GO:0042383	sarcolemma	5.59128373368713e-14	2.46016484282234e-12	1.84806641302922e-12	CCDC78/ANK2/DMD/SCN2B/KCNJ3/SCN5A/CAV3/SNTA1/KCNJ2/OBSCN/BVES/CACNA1C/MLIP/RYR1	14	17.6294326241135
CC	GO:0030018	Z disc	5.17782590969801e-13	1.89853616688927e-11	1.42617310144314e-11	ANK2/DMD/KCNE1/SCN3B/SCN5A/CAV3/KCNA5/OBSCN/TTN/CACNA1C/MYH6/RYR1/MYPN	13	17.4863365800866
CC	GO:0034703	cation channel complex	4.28175295357559e-12	1.34569378540947e-10	1.0108800206186e-10	SCN4B/ABCC9/SCN2B/KCNE1/SCN3B/KCNJ3/SCN5A/KCNH2/CALM2/KCNJ2/KCNA5/CACNA1C/RYR1/SCN10A	14	12.8795336787565
CC	GO:0034702	monoatomic ion channel complex	1.41961700628436e-10	3.90394676728199e-09	2.93262986824533e-09	SCN4B/ABCC9/SCN2B/KCNE1/SCN3B/KCNJ3/SCN5A/KCNH2/CALM2/KCNJ2/KCNA5/CACNA1C/GABRR1/RYR1/SCN10A	15	8.87767857142857
CC	GO:1902495	transmembrane transporter complex	5.97242768197645e-09	1.45992676670535e-07	1.09669139891263e-07	SCN4B/ABCC9/SCN2B/KCNE1/SCN3B/KCNJ3/SCN5A/KCNH2/CALM2/KCNJ2/KCNA5/CACNA1C/GABRR1/RYR1/SCN10A	15	6.75965373459028
CC	GO:0001518	voltage-gated sodium channel complex	9.95784817364810e-09	2.19072659820258e-07	1.64566543501342e-07	SCN4B/SCN2B/SCN3B/SCN5A/SCN10A	5	63.4119897959184
CC	GO:0014704	intercalated disc	1.21658809928948e-08	2.43317619857895e-07	1.8277926467794e-07	SCN4B/ANK2/SCN5A/CAV3/KCNJ2/KCNA5/DSP	7	24.8575
CC	GO:0030315	T-tubule	1.40362752687161e-08	2.45278699443439e-07	1.84252420156077e-07	ANK2/SCN2B/KCNJ3/SCN5A/CAV3/KCNJ2/CACNA1C	7	24.3700980392157
CC	GO:1990351	transporter complex	1.44937413307487e-08	2.45278699443439e-07	1.84252420156077e-07	SCN4B/ABCC9/SCN2B/KCNE1/SCN3B/KCNJ3/SCN5A/KCNH2/CALM2/KCNJ2/KCNA5/CACNA1C/GABRR1/RYR1/SCN10A	15	6.32613674923651
CC	GO:0044291	cell-cell contact zone	1.62066821716447e-07	2.54676434125846e-06	1.9131196247731e-06	SCN4B/ANK2/SCN5A/CAV3/KCNJ2/KCNA5/DSP	7	17.2621527777778
CC	GO:0034706	sodium channel complex	2.02130614203726e-07	2.96458234165465e-06	2.22698290736737e-06	SCN4B/SCN2B/SCN3B/SCN5A/SCN10A	5	36.9903273809524
CC	GO:0034705	potassium channel complex	7.56364551324183e-07	1.04000125807075e-05	7.81244964196689e-06	ABCC9/KCNE1/KCNJ3/KCNH2/CALM2/KCNJ2/KCNA5	7	13.8097222222222
CC	GO:0008076	voltage-gated potassium channel complex	5.54951013585783e-06	7.18171899934543e-05	5.3948798224748e-05	KCNE1/KCNJ3/KCNH2/CALM2/KCNJ2/KCNA5	6	13.4850813743219
CC	GO:0005581	collagen trimer	9.09164343423679e-06	0.00011112008641845	8.34729835774957e-05	COL12A1/COL9A3/COL13A1/COL9A1/COL9A2/SFTPA2	6	12.3874584717608
CC	GO:0005788	endoplasmic reticulum lumen	1.10905883267333e-05	0.00012841733852007	9.64666131466554e-05	PNPLA2/VGF/TRDN/COL12A1/SCG2/COL9A3/COL13A1/MFGE8/COL9A1/COL9A2	10	5.67263806481059
CC	GO:0097060	synaptic membrane	7.65349065271044e-05	0.000841883971798149	0.000632420017092389	ANK2/DMD/KCNJ3/SNTA1/KCNJ2/CACNA1C/COL13A1/SLC6A1/GABRR1/SCN10A	10	4.51790258087968
CC	GO:0034704	calcium channel complex	8.37874980797511e-05	0.000877773789406916	0.000659380310702803	SCN5A/CALM2/CACNA1C/RYR1/SCN10A	5	11.2375678119349
CC	GO:0005901	caveola	9.44064114552642e-05	0.000944064114552642	0.000709177349209401	CAVIN1/SCN5A/CAV3/KCNA5/BVES	5	10.9600970017637
CC	GO:0016010	dystrophin-associated glycoprotein complex	0.000133429536602428	0.00122310408552226	0.000918791107306195	DMD/CAV3/SNTA1	3	29.5922619047619
CC	GO:0043034	costamere	0.000133429536602428	0.00122310408552226	0.000918791107306195	ANK2/DMD/SVIL	3	29.5922619047619
CC	GO:0045211	postsynaptic membrane	0.000166035212742924	0.00146110987213773	0.00109758014318481	ANK2/DMD/SNTA1/KCNJ2/CACNA1C/COL13A1/SLC6A1/GABRR1	8	5.1651948051948
CC	GO:0045121	membrane raft	0.000216799592606057	0.00180876730987064	0.00135873907966359	CAVIN1/DMD/KCNE1/SCN5A/CAV3/PGK1/KCNA5/BVES	8	4.96653346653347
CC	GO:0098857	membrane microdomain	0.00022198507893867	0.00180876730987064	0.00135873907966359	CAVIN1/DMD/KCNE1/SCN5A/CAV3/PGK1/KCNA5/BVES	8	4.94922847187656
CC	GO:0005865	striated muscle thin filament	0.000247715632202894	0.00187922203740126	0.00141166440130143	TPM3/TPM2/ACTA1	3	24.2118506493507
CC	GO:0031430	M band	0.000247715632202894	0.00187922203740126	0.00141166440130143	ANK2/ALDOA/OBSCN	3	24.2118506493507
CC	GO:0005891	voltage-gated calcium channel complex	0.000260621972394495	0.00191122779755963	0.0014357070058223	SCN5A/CACNA1C/RYR1/SCN10A	4	12.912987012987
CC	GO:0090665	glycoprotein complex	0.000283706998730471	0.00201340450711947	0.00151246175893664	DMD/CAV3/SNTA1	3	23.1591614906832
CC	GO:0036379	myofilament	0.00041141849905637	0.00278659793417017	0.00209328170174506	TPM3/TPM2/ACTA1	3	20.4869505494506
CC	GO:0044853	plasma membrane raft	0.000430515705642006	0.00278659793417017	0.00209328170174506	CAVIN1/SCN5A/CAV3/KCNA5/BVES	5	7.9264987244898
CC	GO:0005759	mitochondrial matrix	0.000430656044371754	0.00278659793417017	0.00209328170174506	TK2/DNA2/FLAD1/HADHA/ISCU/TERT/PUS1/ATP5F1E/C1QBP/ALDH4A1	10	3.64586388970373
CC	GO:0016328	lateral plasma membrane	0.000556132153900349	0.00349568782451648	0.00262594731315353	DMD/SCN5A/SNTA1/BVES	4	10.6002132196162
CC	GO:0044306	neuron projection terminus	0.000818957232732237	0.00500473864447478	0.00375954051283512	DMD/NTRK2/ELK1/GAD1/GIT1	5	6.88192137320044
CC	GO:0031672	A band	0.000916385995349752	0.0054487815939715	0.00409310387681113	ANK2/ALDOA/OBSCN	3	15.6664915966387
CC	GO:0009295	nucleoid	0.00207757928919352	0.0117196780416045	0.00880377728484164	DNA2/HADHA/TERT	3	11.8369047619048
CC	GO:0042645	mitochondrial nucleoid	0.00207757928919352	0.0117196780416045	0.00880377728484164	DNA2/HADHA/TERT	3	11.8369047619048
CC	GO:0062023	collagen-containing extracellular matrix	0.00296554049049651	0.0163104726977308	0.012252364658104	COMP/COL12A1/COL9A3/COL13A1/NPPA/MFGE8/COL9A1/COL9A2	8	3.31102231102231
CC	GO:0043679	axon terminus	0.00383340863166896	0.0205695097309066	0.0154517369748916	NTRK2/ELK1/GAD1/GIT1	4	6.28508217446271
CC	GO:0101002	ficolin-1-rich granule	0.00397057855092345	0.0206996596786036	0.0155495051174199	PGM1/ALDOA/PYGL/GAA/DSP	5	4.79874517374517
CC	GO:0042599	lamellar body	0.00404584257354525	0.0206996596786036	0.0155495051174199	ABCA3/SFTPA2	2	20.8886554621849
CC	GO:0005884	actin filament	0.00447197311578693	0.0223598655789346	0.0167966454348935	TPM3/TPM2/ACTA1/ACTC1	4	6.01876513317191
CC	GO:0001725	stress fiber	0.00723996196454042	0.034625905047802	0.0260108473325594	TPM3/ACTA1/MYH6	3	7.6094387755102
CC	GO:0097517	contractile actin filament bundle	0.00723996196454042	0.034625905047802	0.0260108473325594	TPM3/ACTA1/MYH6	3	7.6094387755102
CC	GO:0005938	cell cortex	0.00763657178847947	0.0357456551801167	0.0268519993458293	GYPC/GRB2/SPTA1/GAD1/SPTB/RYR1	6	3.49285714285714
CC	GO:0098978	glutamatergic synapse	0.00824061723351979	0.0377694956536324	0.0283723005627765	VGF/NPTX2/SPTB/KCNJ2/ACTC1/GABRR1/SCN10A	7	3.05374692874693
CC	GO:0016529	sarcoplasmic reticulum	0.00875188083976174	0.0392941588723996	0.029517621736683	CCDC78/TRDN/RYR1	3	7.10214285714286
CC	GO:0042641	actomyosin	0.00907474791698207	0.0399288908347211	0.0299944299571829	TPM3/ACTA1/MYH6	3	7.00869360902256
CC	GO:0032432	actin filament bundle	0.0100848747200664	0.0426667776618192	0.0320511200617494	TPM3/ACTA1/MYH6	3	6.74254068716094
CC	GO:0098982	GABA-ergic synapse	0.0100848747200664	0.0426667776618192	0.0320511200617494	GAD1/SLC6A1/GABRR1	3	6.74254068716094
CC	GO:0070820	tertiary granule	0.0139149854404018	0.0577603169224225	0.0433893289800016	PGM1/ALDOA/GAA/DSP	4	4.33057491289199
CC	GO:0042734	presynaptic membrane	0.0142002841769863	0.057853009609944	0.0434589593720632	KCNJ3/SLC6A1/GABRR1/SCN10A	4	4.30433
CC	GO:0016528	sarcoplasm	0.0156398532340319	0.0625594129361277	0.0469943915357514	CCDC78/TRDN/RYR1	3	5.72753456221198
CC	GO:0030863	cortical cytoskeleton	0.021528883205423	0.0845777554498761	0.0635344861513423	GYPC/SPTA1/SPTB	3	5.07295918367347
CC	GO:0030175	filopodium	0.0231657316140606	0.089411595703392	0.0671656484470457	DMD/ACTA1/ACTC1	3	4.93204365079365
CC	GO:0033017	sarcoplasmic reticulum membrane	0.0255011217095747	0.0967283926914903	0.0726619983376267	TRDN/RYR1	2	8.07061688311688
CC	GO:1904813	ficolin-1-rich granule lumen	0.033006868329603	0.123076458178181	0.0924545642773894	PGM1/ALDOA/PYGL	3	4.29565092165899
CC	GO:0030055	cell-substrate junction	0.0351702457441835	0.128957567728673	0.096872431260295	DMD/CAV3/SVIL/GIT1/ACTC1/IL16	6	2.47174345376202
CC	GO:1902554	serine/threonine protein kinase complex	0.0357575389437132	0.128961615862572	0.0968754722029848	PHKG2/PHKA2/PHKA1	3	4.16141183035714
CC	GO:1904724	tertiary granule lumen	0.0384684381076359	0.136500909414192	0.102538960660422	PGM1/ALDOA	2	6.45649350649351
CC	GO:0101003	ficolin-1-rich granule membrane	0.0463911136580898	0.162000714361584	0.121694316529993	GAA/DSP	2	5.82142857142857
MF	GO:0086008	voltage-gated potassium channel activity involved in cardiac muscle cell action potential repolarization	1.8472499718009e-10	2.46492167100276e-08	2.07433599670651e-08	SCN2B/KCNE1/KCNJ3/KCNH2/KCNJ2/KCNA5	6	67.2581818181818
MF	GO:0005244	voltage-gated monoatomic ion channel activity	1.97720989652628e-10	2.46492167100276e-08	2.07433599670651e-08	SCN4B/ABCC9/SCN2B/KCNE1/SCN3B/KCNJ3/SCN5A/KCNH2/KCNJ2/KCNA5/CACNA1C/RYR1/SCN10A	13	10.9294545454545
MF	GO:0022832	voltage-gated channel activity	1.97720989652628e-10	2.46492167100276e-08	2.07433599670651e-08	SCN4B/ABCC9/SCN2B/KCNE1/SCN3B/KCNJ3/SCN5A/KCNH2/KCNJ2/KCNA5/CACNA1C/RYR1/SCN10A	13	10.9294545454545
MF	GO:0044325	transmembrane transporter binding	4.07436062558365e-10	3.80952718492072e-08	3.20587849223556e-08	SCN4B/ANK2/ABCC9/KCNE1/SCN3B/SCN5A/TRDN/CAV3/SNTA1/CALM2/SCN10A	11	13.9067669172932
MF	GO:0022839	monoatomic ion gated channel activity	8.89086849580117e-10	5.78101478295645e-08	4.86496881537849e-08	SCN4B/ABCC9/SCN2B/KCNE1/SCN3B/KCNJ3/SCN5A/KCNH2/KCNJ2/KCNA5/CACNA1C/GABRR1/RYR1/SCN10A/PIEZO2	15	7.76055944055944
MF	GO:0022836	gated channel activity	9.27435526677505e-10	5.78101478295645e-08	4.86496881537849e-08	SCN4B/ABCC9/SCN2B/KCNE1/SCN3B/KCNJ3/SCN5A/KCNH2/KCNJ2/KCNA5/CACNA1C/GABRR1/RYR1/SCN10A/PIEZO2	15	7.73675404350251
MF	GO:0005261	monoatomic cation channel activity	1.24133078966717e-09	6.63225307622176e-08	5.58132189639827e-08	SCN4B/ABCC9/SCN2B/KCNE1/SCN3B/KCNJ3/SCN5A/KCNH2/KCNJ2/KCNA5/ATP5F1E/CACNA1C/RYR1/SCN10A/PIEZO2	15	7.57411957411957
MF	GO:0022843	voltage-gated monoatomic cation channel activity	1.82462027848894e-09	8.53009980193581e-08	7.17844030616045e-08	ABCC9/SCN2B/KCNE1/KCNJ3/SCN5A/KCNH2/KCNJ2/KCNA5/CACNA1C/RYR1/SCN10A	11	12.0888888888889
MF	GO:0005216	monoatomic ion channel activity	7.95604045957598e-09	3.30617681320157e-07	2.78228783323183e-07	SCN4B/ABCC9/SCN2B/KCNE1/SCN3B/KCNJ3/SCN5A/KCNH2/KCNJ2/KCNA5/ATP5F1E/CACNA1C/GABRR1/RYR1/SCN10A/PIEZO2	16	6.07297352760107
MF	GO:0005248	voltage-gated sodium channel activity	1.64930499682041e-07	6.16840068810832e-06	5.19097046367686e-06	SCN4B/SCN2B/SCN3B/SCN5A/SCN10A	5	38.2148760330579
MF	GO:0046873	metal ion transmembrane transporter activity	3.56772691808257e-07	1.10595604900486e-05	9.30708861954558e-06	SCN4B/ABCC9/SCN2B/KCNE1/SCN3B/KCNJ3/SCN5A/KCNH2/KCNJ2/KCNA5/CACNA1C/SLC6A1/RYR1/SCN10A	14	5.33795093795094
MF	GO:0050998	nitric-oxide synthase binding	3.78445543008434e-07	1.10595604900486e-05	9.30708861954558e-06	DMD/SCN5A/CAV3/SNTA1	4	61.1438016528926
MF	GO:0005516	calmodulin binding	3.84423225589926e-07	1.10595604900486e-05	9.30708861954558e-06	PHKG2/SCN5A/PHKA2/SNTA1/PHKA1/OBSCN/TTN/CACNA1C/MYH6/RYR1	10	8.24242424242424
MF	GO:1902282	voltage-gated potassium channel activity involved in ventricular cardiac muscle cell action potential repolarization	5.65067810133547e-07	1.50953829278533e-05	1.27034041526264e-05	SCN2B/KCNE1/KCNJ3/KCNH2	4	56.0484848484848
MF	GO:0099106	ion channel regulator activity	1.3555012162431e-06	3.37971636583281e-05	2.84417448180132e-05	SCN4B/ABCC9/SCN2B/KCNE1/SCN3B/CAV3/SNTA1/CALM2	8	10.0385345997286
MF	GO:0016247	channel regulator activity	1.7869686292851e-06	4.17703917095393e-05	3.51515539576478e-05	SCN4B/ABCC9/SCN2B/KCNE1/SCN3B/CAV3/SNTA1/CALM2	8	9.67743623283192
MF	GO:0003779	actin binding	2.03403197054454e-06	4.28113986518362e-05	3.60276053951562e-05	TPM3/DMD/SYN1/SPTA1/SPTB/ALDOA/SNTA1/SVIL/KBTBD13/TTN/TPM2/MYH6/MYPN	13	4.99061851390619
MF	GO:0005249	voltage-gated potassium channel activity	2.06044164634506e-06	4.28113986518362e-05	3.60276053951562e-05	ABCC9/SCN2B/KCNE1/KCNJ3/KCNH2/KCNJ2/KCNA5	7	11.889072543618
MF	GO:0017080	sodium channel regulator activity	3.32724008692116e-06	6.54940943425534e-05	5.51160546254531e-05	SCN4B/SCN2B/SCN3B/CAV3/SNTA1	5	21.5571095571096
MF	GO:0005272	sodium channel activity	5.45854676175672e-06	0.000102074824444851	8.59002885139611e-05	SCN4B/SCN2B/SCN3B/SCN5A/SCN10A	5	19.5517970401691
MF	GO:0030020	extracellular matrix structural constituent conferring tensile strength	6.86297460889587e-06	0.000122226309701288	0.000102858616945357	COL12A1/COL9A3/COL13A1/COL9A1/COL9A2	5	18.6828282828283
MF	GO:0005267	potassium channel activity	8.28863112305624e-06	0.000140906729091956	0.00011857898113846	ABCC9/SCN2B/KCNE1/KCNJ3/KCNH2/KCNJ2/KCNA5	7	9.64769001490313
MF	GO:0005242	inward rectifier potassium channel activity	1.87023905832102e-05	0.00030411713383133	0.000255927450086034	ABCC9/KCNJ3/KCNH2/KCNJ2	4	24.9104377104377
MF	GO:0051393	alpha-actinin binding	2.17197407501918e-05	0.000338465960023823	0.000284833442294182	KCNA5/TTN/CACNA1C/MYPN	4	24.0207792207792
MF	GO:0051015	actin filament binding	3.43205478136757e-05	0.000513435395292588	0.000432077633527959	TPM3/SPTA1/SPTB/SVIL/KBTBD13/TTN/TPM2/MYH6	8	6.46713286713287
MF	GO:0015079	potassium ion transmembrane transporter activity	4.25151605477481e-05	0.00061156423249453	0.000514657206630634	ABCC9/SCN2B/KCNE1/KCNJ3/KCNH2/KCNJ2/KCNA5	7	7.49693109438332
MF	GO:0005200	structural constituent of cytoskeleton	5.53398713927323e-05	0.000766559700032663	0.000645092457950369	ANK2/DMD/SPTA1/SPTB/ACTA1/DSP	6	9.00779220779221
MF	GO:0042805	actinin binding	6.02392689797329e-05	0.000781125276662873	0.000657350007661691	KCNA5/TTN/CACNA1C/MYPN	4	18.6828282828283
MF	GO:0005201	extracellular matrix structural constituent	6.05685374952495e-05	0.000781125276662873	0.000657350007661691	COMP/COL12A1/COL9A3/COL13A1/MFGE8/COL9A1/COL9A2	7	7.09047097480832
MF	GO:0008307	structural constituent of muscle	0.000111367784644462	0.00138838504856763	0.00116838482837524	DMD/OBSCN/TTN/TPM2	4	16.0138528138528
MF	GO:0030506	ankyrin binding	0.00018502944475787	0.0022322907206272	0.00187856719805104	SCN5A/SPTB/OBSCN	3	26.5492822966507
MF	GO:0015276	ligand-gated monoatomic ion channel activity	0.000238214753530836	0.00278413493189165	0.00234296747716184	ABCC9/KCNJ3/KCNH2/KCNJ2/GABRR1/RYR1	6	6.91008717310087
MF	GO:0022834	ligand-gated channel activity	0.000247164572968784	0.00280119849364622	0.0023573271871664	ABCC9/KCNJ3/KCNH2/KCNJ2/GABRR1/RYR1	6	6.86307977736549
MF	GO:0005245	voltage-gated calcium channel activity	0.000257340987272267	0.00283075085999494	0.00238219675524482	SCN5A/CACNA1C/RYR1/SCN10A	4	12.9342657342657
MF	GO:0015081	sodium ion transmembrane transporter activity	0.000352025795888406	0.00376164707606468	0.00316558535250025	SCN4B/SCN2B/SCN3B/SCN5A/SLC6A1/SCN10A	6	6.42594093804285
MF	GO:0008331	high voltage-gated calcium channel activity	0.000378204459914764	0.00392912411133671	0.00330652437176943	SCN5A/CACNA1C/SCN10A	3	21.0181818181818
MF	GO:0099094	ligand-gated monoatomic cation channel activity	0.000506179514829324	0.00511651725800452	0.00430576600096637	ABCC9/KCNJ3/KCNH2/KCNJ2/RYR1	5	7.64297520661157
MF	GO:0004683	calmodulin-dependent protein kinase activity	0.000539519589031671	0.0053100085867854	0.00446859715015152	PHKG2/PHKA2/PHKA1	3	18.6828282828283
MF	GO:0005251	delayed rectifier potassium channel activity	0.000601655570825449	0.00576972265355687	0.00485546601017029	KCNE1/KCNH2/KCNA5	3	18.0155844155844
MF	GO:0097110	scaffold protein binding	0.000719688113053443	0.00672908385704969	0.00566280910007841	SCN5A/KCNH2/KCNA5/DSP	4	9.89090909090909
MF	GO:0008200	ion channel inhibitor activity	0.00107088300224625	0.00976854250829506	0.0082206423022241	SCN3B/CAV3/CALM2	3	14.8363636363636
MF	GO:0016248	channel inhibitor activity	0.00116623532662994	0.0103850479085619	0.00873945771083593	SCN3B/CAV3/CALM2	3	14.4124675324675
MF	GO:0043531	ADP binding	0.00148386485500669	0.0129061733900582	0.0108610915947858	PGK1/COQ8A/ACTA1	3	13.2746411483254
MF	GO:0099508	voltage-gated monoatomic ion channel activity involved in regulation of presynaptic membrane potential	0.00222497191449225	0.0189122612731841	0.0159154689577316	KCNJ3/SCN10A	2	28.0242424242424
MF	GO:0031432	titin binding	0.00261932125107483	0.0217694699533775	0.0183199310893889	CALM2/OBSCN	2	25.8685314685315
MF	GO:0015459	potassium channel regulator activity	0.00291411175254822	0.0236929955533269	0.0199386593595405	ABCC9/KCNE1/CAV3	3	10.5090909090909
MF	GO:0016830	carbon-carbon lyase activity	0.00327403325549493	0.0260529454798958	0.0219246571868529	PCK1/GAD1/ALDOA	3	10.0887272727273
MF	GO:0051371	muscle alpha-actinin binding	0.00349874991701434	0.0272610931034034	0.0229413645874405	TTN/MYPN	2	22.4193939393939
MF	GO:0061629	RNA polymerase II-specific DNA-binding transcription factor binding	0.00449273843324211	0.0337546243861094	0.0284059462185384	EGR2/GATA4/ELK1/CITED2/NKX2-5/TBX5/TBX20	7	3.4215644820296
MF	GO:0030170	pyridoxal phosphate binding	0.00451265031899858	0.0337546243861094	0.0284059462185384	PYGM/GAD1/PYGL	3	9.00779220779221
MF	GO:0070279	vitamin B6 binding	0.00474296337077504	0.0347817313856836	0.0292703002654641	PYGM/GAD1/PYGL	3	8.84976076555024
MF	GO:0030246	carbohydrate binding	0.0058348659472662	0.0419661512361069	0.0353162938913481	NPTX2/ALDOA/PYGL/GAA/COL9A1/SFTPA2	6	3.6955044955045
MF	GO:0016829	lyase activity	0.00633633856007158	0.0447130305937126	0.0376279092246555	PCK1/HADHA/GAD1/ALDOA/ENO3	5	4.28942486085343
MF	GO:0001228	DNA-binding transcription activator activity, RNA polymerase II-specific	0.00710502904912924	0.048855466946286	0.041113944883027	EGR1/EGR2/GATA4/ELK1/NKX2-5/TBX5/TBX20/EGR4	8	2.85597375024127
MF	GO:0005262	calcium channel activity	0.00718462749210088	0.048855466946286	0.041113944883027	SCN5A/CACNA1C/RYR1/SCN10A	4	5.25454545454545
MF	GO:0001216	DNA-binding transcription activator activity	0.00746010101806136	0.0491540901615823	0.0413652489679514	EGR1/EGR2/GATA4/ELK1/NKX2-5/TBX5/TBX20/EGR4	8	2.83192344497608
MF	GO:0070034	telomerase RNA binding	0.00749139876794169	0.0491540901615823	0.0413652489679514	PARN/TERT	2	15.2859504132231
MF	GO:0008093	cytoskeletal anchor activity	0.00888184862009452	0.056301887862972	0.0473804235041617	ANK2/SYN1	2	14.0121212121212
MF	GO:0035035	histone acetyltransferase binding	0.00888184862009452	0.056301887862972	0.0473804235041617	EGR1/CITED2	2	14.0121212121212
MF	GO:0017022	myosin binding	0.00977051791309829	0.060902894991646	0.0512523658950244	DMD/ACTA1/ACTC1	3	6.81670761670762
MF	GO:0016866	intramolecular transferase activity	0.0111653478089324	0.0680541203898036	0.0572704249832572	PGM1/PUS1	2	12.4552188552189
MF	GO:0015085	calcium ion transmembrane transporter activity	0.011281699102053	0.0680541203898036	0.0572704249832572	SCN5A/CACNA1C/RYR1/SCN10A	4	4.60672478206725
MF	GO:0000049	tRNA binding	0.0116675259733366	0.0692643605401249	0.058288893333795	FARSA/TERT/PUS1	3	6.38527042577675
MF	GO:0005546	phosphatidylinositol-4,5-bisphosphate binding	0.0133272732198292	0.0775103920942156	0.0652282781766689	SVIL/KCNJ2/OBSCN	3	6.07754654983571
MF	GO:0005184	neuropeptide hormone activity	0.0136783044872145	0.0775103920942156	0.0652282781766689	VGF/NPPA	2	11.209696969697
MF	GO:0160041	neuropeptide activity	0.0136783044872145	0.0775103920942156	0.0652282781766689	VGF/NPPA	2	11.209696969697
MF	GO:0016831	carboxy-lyase activity	0.0173708331205034	0.0969655460756459	0.0816006143445487	PCK1/GAD1	2	9.89090909090909
MF	GO:0000146	microfilament motor activity	0.0203857332740001	0.112121533007001	0.0943550193332204	MYH6/ACTC1	2	9.08894348894349
MF	GO:0140297	DNA-binding transcription factor binding	0.0238249571524361	0.129138173550886	0.108675243151463	EGR2/GATA4/ELK1/CITED2/NKX2-5/TBX5/TBX20	7	2.4675433581094
MF	GO:1902936	phosphatidylinositol bisphosphate binding	0.026632083193062	0.142291415917217	0.119744253755271	SVIL/KCNJ2/OBSCN	3	4.67070707070707
MF	GO:0005246	calcium channel regulator activity	0.029388236273666	0.154805638962691	0.130275502532634	CAV3/CALM2	2	7.47313131313131
MF	GO:0140359	ABC-type transporter activity	0.0331030362819085	0.171951882908803	0.144704793103664	ABCC9/ABCA3	2	7.00606060606061
MF	GO:0098632	cell-cell adhesion mediator activity	0.0383242737351775	0.196346279136389	0.165233710840924	DSP/MYPN	2	6.46713286713287
MF	GO:0000287	magnesium ion binding	0.0448033852753792	0.226438730986376	0.190557783745923	PCK1/FARSA/PGM1/ENO3	4	3.0025974025974
MF	GO:0070851	growth factor receptor binding	0.0492704264126049	0.24569519304419	0.206762912243774	CSF3/GRB2/NRTN	3	3.65533596837945
