# Supplementary material for: Integrated bulk RNA and single-cell RNA sequencing to identify and validate exercise-related genes for predicting the prognosis of invasive ductal carcinoma
Source: Research Square preprint supplement (doi:10.21203/rs.3.rs-8444169/v1), 2026-01-16
Supplement: Supplementary file 10 [file 7a2dea054966865285d34e39.xlsx]

## Sheet: Supplementary Table 13
Gene set enrichment analysis (GSEA) pathways for MLIP
ID	setSize	enrichmentScore	NES	pvalue	p.adjust	qvalue	rank	leading_edge	core_enrichment
HALLMARK_ESTROGEN_RESPONSE_EARLY	200	-0.576411	-2.77718	1e-10	6.25e-10	1.18421052631579e-10	2978	tags=44%, list=5%, signal=41%	OLFM1/TSKU/KRT19/SULT2B1/ELOVL2/AFF1/PDZK1/PLAAT3/CELSR2/DYNLT3/SYNGR1/UNC119/OVOL2/IGFBP4/RAPGEFL1/TPBG/PRSS23/MAST4/NRIP1/SNX24/ABHD2/FLNB/ADCY1/ABCA3/KRT8/TJP3/SCNN1A/CISH/AMFR/FASN/SLC1A4/SLC19A2/STC2/RETREG1/AR/ELOVL5/TTC39A/DHRS2/SIAH2/TOB1/TBC1D30/BCL2/PGR/ADCY9/SLC7A2/IGF1R/ASB13/MREG/MED13L/FAM102A/SEMA3B/BHLHE40/MINDY1/FKBP4/REEP1/MAPT/KDM4B/LRIG1/CANT1/KRT18/ABAT/IL6ST/MYB/TFF3/SLC27A2…
HALLMARK_ALLOGRAFT_REJECTION	200	0.644961161098441	2.50627444258089	1e-10	6.25e-10	1.18421052631579e-10	11166	tags=66%, list=20%, signal=53%	EGFR/LYN/LY75/HLA-DOB/IL6/ETS1/IFNGR1/IFNAR2/LIF/EREG/CCL13/CCL19/FAS/LCK/CCL2/IL12A/SOCS1/HLA-E/IL27RA/NCK1/CD8B/TLR1/IFNGR2/ICAM1/CCL5/PRF1/CCND3/CD7/MAP4K1/CD40/TLR6/IRF4/CD1D/IL18RAP/ABI1/CD247/ZAP70/CD96/TLR2/GZMB/SIT1/HDAC9/CDKN2A/TAP2/TNF/CD3D/IL2RG/KLRD1/CD40LG/CCL22/IL2RA/LTB/NOS2/CD3E/SRGN/CD79A/PF4/FGR/CTSS/ACHE/ITK/CSK/CD2/HIF1A/NCR1/IL15/IL12B/TGFB2/SOCS5/PRKCB/TRAT1/CD3G/STAT4/FLNA/…
HALLMARK_TNFA_SIGNALING_VIA_NFKB	199	0.638679844645467	2.48189736478342	1e-10	6.25e-10	1.18421052631579e-10	7924	tags=57%, list=14%, signal=49%	ETS2/PTX3/RCAN1/CXCL1/EDN1/CXCL2/FOSL1/ATF3/BMP2/PTGS2/PNRC1/CXCL6/BTG3/NFIL3/IL6/SGK1/FUT4/CXCL3/LAMB3/SPSB1/SERPINB2/LIF/CCL20/TRIP10/CFLAR/SOD2/TNFAIP3/CEBPB/NAMPT/DNAJB4/G0S2/NR4A3/SERPINB8/IL15RA/HBEGF/MAP2K3/KLF6/CCL2/NFKBIE/TRAF1/PPP1R15A/SOCS3/SPHK1/GPR183/EHD1/MAP3K8/RELB/MCL1/BCL2A1/RNF19B/BIRC3/EGR2/IFNGR2/SLC2A3/ICAM1/PTGER4/CCL5/CD83/CSF2/IL7R/PHLDA1/MAFF/ZFP36/PLAUR/TNFSF9/TLR2/CCN1…
HALLMARK_INFLAMMATORY_RESPONSE	199	0.6012671868713	2.33651250957354	1e-10	6.25e-10	1.18421052631579e-10	11527	tags=62%, list=20%, signal=49%	MET/EDN1/CX3CL1/CHST2/OPRK1/TACR1/LYN/CXCL6/IL6/LAMP3/CD82/CCL24/LIF/CCL20/ITGB8/IL18R1/MARCO/NMUR1/EREG/CCL17/NAMPT/NMI/IL15RA/HBEGF/LCK/KLF6/CCL2/SELE/ADORA2B/HRH1/SPHK1/GPR183/TLR1/TNFRSF1B/RTP4/ADM/IFNGR2/CXCL8/ICAM1/PTGER4/CCL5/KCNJ2/IL7R/CD40/IL18RAP/ROS1/ABI1/PLAUR/TNFSF9/TLR2/IRAK2/CCL22/APLNR/PROK2/SLAMF1/SCARF1/CD69/CCR7/SLC4A4/LTA/HIF1A/IL15/IL12B/HAS2/RHOG/IL1R1/CSF3/TNFRSF9/F3/IL4R/C…
HALLMARK_KRAS_SIGNALING_UP	200	0.593636583934846	2.30683068723551	1e-10	6.25e-10	1.18421052631579e-10	9132	tags=52%, list=16%, signal=43%	SLPI/MALL/ALDH1A3/MPZL2/EMP1/IL1RL2/BMP2/PTGS2/GPRC5B/SPRY2/TMEM100/ETS1/GUCY1A1/ANGPTL4/GALNT3/SNAP91/KCNN4/FGF9/LIF/CCL20/TFPI/TNNT2/EREG/TNFAIP3/SCG3/G0S2/IL33/ALDH1A2/HBEGF/ENG/GYPC/SOX9/HSD11B1/TRAF1/TSPAN7/PPP1R15A/RELN/TNFRSF1B/BIRC3/ST6GAL1/HKDC1/CSF2/CIDEA/PPBP/BTBD3/MAP4K1/IL7R/ETV5/MYCN/PCSK1N/CSF2RA/BTC/PLAUR/SATB1/RBP4/HDAC9/KLF4/IL2RG/IGFBP3/NGF/PDCD1LG2/WNT7A/TMEM158/LY96/GFPT2/USH…
HALLMARK_ESTROGEN_RESPONSE_LATE	200	-0.465288	-2.24179	1e-10	6.25e-10	1.18421052631579e-10	6797	tags=48%, list=12%, signal=42%	CDH1/GINS2/TPSAB1/HPRT1/CDC6/CXCL14/CHST8/SERPINA3/BLVRB/RBBP8/PLXNB1/TOP2A/PRKAR2B/NPY1R/IL17RB/BAG1/NCOR2/BATF/HSPB8/ST6GALNAC2/CHPT1/SNX10/RAB31/ALDH3A2/DCXR/PTGER3/FGFR3/OLFM1/KRT19/SULT2B1/AFF1/PDZK1/CYP4F11/PLAAT3/METTL3/CELSR2/DYNLT3/MOCS2/OVOL2/IGFBP4/RAPGEFL1/TPBG/PRSS23/LARGE1/DNAJC1/NRIP1/ABHD2/FLNB/ASCL1/ABCA3/TJP3/SCNN1A/CISH/AMFR/SLC1A4/ELOVL5/DHRS2/DLG5/EMP2/SIAH2/TOB1/BCL2/PGR/SOR…
HALLMARK_EPITHELIAL_MESENCHYMAL_TRANSITION	200	0.542255297279027	2.10716656272748	1e-10	6.25e-10	1.18421052631579e-10	11524	tags=47%, list=20%, signal=38%	SFRP1/PTX3/CXCL1/PCOLCE2/CXCL6/SERPINE2/FOXC2/IL6/FGF2/PLOD1/VIM/FBLN2/LAMC2/TNFAIP3/GPX7/FAS/FBLN5/DKK1/SERPINH1/CALD1/CD59/GLIPR1/CXCL8/IL32/SNTB1/CRLF1/TPM2/FZD8/MYLK/PLAUR/CCN1/SAT1/CCN2/MMP3/IGFBP3/TNFRSF12A/SNAI2/LAMA1/GAS1/ANPEP/COLGALT1/SDC1/TAGLN/NNMT/DPYSL3/IL15/JUN/ELN/GEM/PLOD3/FLNA/ABI3BP/CALU/FERMT2/PDLIM4/TPM1/TPM4/FSTL1/COL4A2/BMP1/DST/P3H1/NT5E/MYL9/ACTA2/CAPG/PMEPA1/WIPF1/GADD45…
HALLMARK_INTERFERON_GAMMA_RESPONSE	199	0.524927030496482	2.03985615737725	1e-10	6.25e-10	1.18421052631579e-10	12592	tags=53%, list=22%, signal=41%	PELI1/PIM1/PLA2G4A/PTGS2/PML/IL6/IFNAR2/UPP1/NOD1/SOD2/TNFAIP3/NAMPT/NMI/IL15RA/FAS/CCL2/CSF2RB/PFKP/SOCS1/SOCS3/ARL4A/C1S/RTP4/PSMB2/ICAM1/C1R/PTPN2/LATS2/NUP93/CCL5/SELP/CD40/P2RY14/IDO1/SERPING1/IRF4/CASP4/CD38/MX2/VAMP5/GBP6/XCL1/CD69/GPR18/CASP1/HIF1A/IL15/PLSCR1/KLRK1/BANK1/ISG20/IL18BP/STAT4/GZMA/IL4R/CCL7/IRF8/HLA-A/NLRC5/PDE4B/SSPN/IL10RA/HLA-B/RIPK2/PSMB10/CXCL10/CXCL11/CXCL9/LY6E/SLAMF…
HALLMARK_IL6_JAK_STAT3_SIGNALING	87	0.615870146231828	2.21256934671628	8.46552494660573e-10	4.70306941478096e-09	8.91107889116393e-10	11166	tags=67%, list=20%, signal=54%	IL1R2/CXCL1/PIM1/IL6/CXCL3/IFNGR1/IL18R1/TNFRSF21/PLA2G2A/IL15RA/FAS/CSF2RB/SOCS1/SOCS3/MAP3K8/TNFRSF1B/IFNGR2/A2M/PTPN2/CSF2/CSF2RA/TLR2/CD38/TNF/IL2RG/TNFRSF12A/IL2RA/LTB/ACVRL1/PF4/REG1A/BAK1/JUN/LEPR/IL1R1/IL4R/CD36/CRLF2/CCL7/IL3RA/IL12RB1/CD14/OSMR/TNFRSF1A/CNTFR/EBI3/CXCL10/CXCL11/CXCL9/IL7/LTBR/IL1B/MYD88/CXCL13/IRF1/ITGB3/IL10RB/CCR1
HALLMARK_COMPLEMENT	200	0.502021688065337	1.95082154137252	1.53414151133022e-09	7.67070755665109e-09	1.45339722126021e-09	9385	tags=44%, list=17%, signal=37%	L3MBTL4/CXCL1/PIM1/PLA2G4A/LYN/FYN/KLK1/DGKG/IL6/PRSS3/SERPINB2/S100A9/TNFAIP3/XPNPEP1/CEBPB/SCG3/LGALS3/CR2/C3/SPOCK2/FCN1/LCK/FDX1/PCSK9/ANXA5/EHD1/C1S/MMP15/CP/CD59/PREP/C1R/CCL5/MMP12/SERPING1/CASP4/MAFF/LTF/PLAUR/S100A12/GZMB/CR1/CTSC/CD40LG/LGMN/CASP10/HPCAL4/CTSS/MMP8/GNB4/CASP1/F5/PLSCR1/ADRA2B/PFN1/CTSV/PLA2G7/RHOG/GNG2/KYNU/GZMA/F3/CDA/KCNIP2/CD36/GZMK/COL4A2/WAS/ITIH1/DPP4/DGKH/KLKB1/C…
HALLMARK_IL2_STAT5_SIGNALING	198	0.50101398075717	1.94198222449928	2.61519044812698e-09	1.18872293096681e-08	2.25231713235816e-09	10146	tags=49%, list=18%, signal=41%	IL1R2/PLAGL1/GLIPR2/EMP1/PIM1/BMP2/PRNP/BATF3/NFIL3/CD79B/TNFRSF8/IFNGR1/ANXA4/LIF/PLIN2/IL18R1/MYO1E/RRAGD/TNFRSF21/NCS1/KLF6/TRAF1/CCNE1/SOCS1/ODC1/PTCH1/ITGA6/LRRC8C/ARL4A/MAP3K8/TNFRSF1B/GUCY1B1/SLC2A3/PENK/CD83/CSF2/CCND3/SELP/PHLDA1/IRF4/GABARAPL1/MAFF/ITIH5/CDKN1C/SCN9A/IL2RA/LTB/S100A1/SHE/ICOS/TTC39B/SWAP70/PLSCR1/CTLA4/TNFRSF9/CCR4/TNFRSF4/DCPS/IL4R/CD48/EOMES/NRP1/ABCB1/SYT11/COCH/CST7…
HALLMARK_APICAL_JUNCTION	198	0.481689121644162	1.86707706350617	4.88932631210615e-08	2.0372192967109e-07	3.85999445692591e-08	11248	tags=46%, list=20%, signal=37%	EGFR/DSC3/MPZL2/CX3CL1/FSCN1/MSN/RSU1/CALB2/CDH3/GNAI1/SIRPA/CLDN8/LAMB3/ICAM2/COL9A1/LAMC2/MPZL1/CADM3/DSC1/NECTIN4/ACTG2/ITGA9/CLDN6/ADAM15/ACTN1/CNN2/NECTIN1/ITGB4/TRAF1/SPEG/ZYX/CLDN15/SLC30A3/ACTB/CLDN14/ICAM1/CDK8/CLDN11/ADAMTS5/CLDN4/NECTIN3/FLNC/EPB41L2/AKT3/NRTN/CLDN9/ARPC2/ICAM5/NEXN/MVD/PFN1/CD209/CLDN19/VASP/VCL/ACTC1/ACTN4/BMP1/PECAM1/SGCE/CLDN5/MYL9/CD99/VWF/CLDN18/MAPK11/COL17A1/CD…
HALLMARK_COAGULATION	138	0.520130695454885	1.95410750066785	1.17356377527086e-07	4.20601430764906e-07	7.96929026712453e-08	11085	tags=45%, list=20%, signal=36%	ANXA1/KLK8/GSN/TF/MMP7/LEFTY2/FYN/PROS1/SERPINB2/CAPN2/C3/CFI/DCT/RGN/C1S/MMP15/GDA/A2M/PREP/C1R/P2RY1/SERPING1/MAFF/MMP3/LGMN/S100A1/SH2B2/PF4/MMP8/CTSV/CAPN5/CTSE/SIRT2/HRG/F3/C8G/BMP1/PECAM1/VWF/ITIH1/DPP4/KLKB1/CSRP1/PLG/CPQ/PLEK/SERPINE1/MMP14/C9/CFH/TFPI2/LAMP2/MMP2/KLF7/MEP1A/CTSH/MMP1/C1QA/MSRB2/THBD/ITGB3/CPB2
HALLMARK_MYOGENESIS	198	0.475497903399321	1.84307925857205	1.24443363856978e-07	4.20601430764906e-07	7.96929026712453e-08	8569	tags=41%, list=15%, signal=35%	CRYAB/MRAS/WWTR1/NOTCH1/SOD3/GSN/DMD/KIFC3/PRNP/KLF5/DES/IFRD1/MYOM1/RYR1/SCHIP1/FGF2/GPX3/NOS1/LPIN1/TNNT2/TNNI2/SVIL/MYOZ1/PYGM/HBEGF/BIN1/ITGB4/EFS/TNNT3/SPHK1/SPEG/ITGA7/PTGIS/APP/SGCA/EPHB3/TPM2/CNN3/MYLK/MEF2C/IGFBP3/TEAD4/SMTN/APLNR/GJA5/MYL2/FHL1/IGF1/TAGLN/ACSL1/ACHE/ABLIM1/PTP4A3/TPD52L1/SIRT2/COL15A1/CD36/SORBS1/ACTC1/CKM/CASQ2/MYH7/APOD/COL4A2/NAV2/CKMT2/MYBPC3/HSPB2/IGFBP7/LSP1/SSPN/…
HALLMARK_HYPOXIA	199	0.471497239415215	1.83222903590587	1.26180429229472e-07	4.20601430764906e-07	7.96929026712453e-08	8403	tags=37%, list=15%, signal=32%	EGFR/CHST3/PKP1/CSRP2/CHST2/ATF3/PIM1/PNRC1/UGP2/GCNT2/NFIL3/TES/IL6/TKTL1/ETS1/ANGPTL4/PHKG1/PLIN2/RRAGD/PLAC8/VLDLR/TNFAIP3/XPNPEP1/HS3ST1/PRKCA/PYGM/CAVIN3/KLF6/PPARGC1A/ADORA2B/PFKP/PPP1R15A/CP/S100A4/ADM/LALBA/SLC2A3/CAV1/ANXA2/CAVIN1/ENO1/EDN2/MAFF/ZFP36/PLAUR/CCN1/CDKN1C/CCN2/PGM1/IGFBP3/PAM/HAS1/SRPX/PGF/EFNA1/JUN/ISG20/ERRFI1/F3/EFNA3/NDRG1/DPYSL4/TMEM45A/KDELR3/EXT1/NCAN/KLHL24/SLC2A5/L…
HALLMARK_DNA_REPAIR	149	-0.418817	-1.96199	1.36176572098525e-07	4.25551787807892e-07	8.06308650583374e-08	8262	tags=36%, list=15%, signal=30%	TAF10/ERCC2/NT5C/GPX4/VPS28/ZWINT/SNAPC5/HPRT1/NME1/MPG/DAD1/LIG1/RPA3/POLR2K/NCBP2/DDB2/VPS37D/ERCC8/RFC5/DDB1/MRPL40/POLR2A/POLA1/GTF2F1/ERCC4/TMED2/CETN2/TARBP2/NME4/GTF2H3/NUDT9/BRF2/COX17/RAE1/SMAD5/SURF1/POLL/NME3/IMPDH2/XPC/ADCY6/TAF9/SRSF6/RRM2B/PRIM1/POLD4/AAAS/TSG101/ARL6IP1/GMPR2/DCTN4/BCAM/CANT1
HALLMARK_KRAS_SIGNALING_DN	200	0.47086368416893	1.82974369427487	2.2369872083095e-07	6.57937414208676e-07	1.24661825850065e-07	6292	tags=34%, list=11%, signal=30%	CLDN16/SLC6A14/KLK8/KLK7/PKP1/KRT5/SOX10/EDN1/CHST2/EDAR/CPA2/SMPX/CYP39A1/TCF7L1/PTGFR/KRT4/TGM1/SGK1/KCNMB1/RYR1/CLDN8/NOS1/SERPINB2/CCNA1/ATP4A/GPR3/NPY4R/DLK2/CALML5/KRT15/DCC/CALCB/SLC30A3/SLC16A7/SHOX2/RYR2/NUDT11/EDN2/WNT16/SLC12A3/TCL1A/TEX15/MACROH2A2/CD40LG/SYNPO/CDH16/PLAG1/SPRR3/GPR19/CDKAL1/KRT13/DTNB/IL12B/TGFB2/ABCG4/AMBN/CAMK1D/KCND1/ACTC1/CKM/PDCD1/MYH7/KLHDC8A/SLC6A3/ITGB1BP2/TL…
HALLMARK_OXIDATIVE_PHOSPHORYLATION	200	-0.372111	-1.79285	6.76103902836623e-07	1.8780663967684e-06	3.55844159387696e-07	9937	tags=38%, list=17%, signal=31%	NDUFS8/NDUFAB1/NNT/TIMM10/NDUFA8/NDUFA7/ATP5F1A/IMMT/ATP5F1E/MTX2/NDUFA3/PMPCA/COX8A/TIMM9/GPX4/MTRR/ECHS1/NDUFB1/AIFM1/TIMM17A/RETSAT/ISCU/BCKDHA/ABCB7/ISCA1/SLC25A4/IDH3A/VDAC1/ATP6V1D/ATP5ME/UQCRQ/ATP5F1B/NDUFS4/ATP5PD/NDUFS1/ATP6V1G1/SLC25A20/ACO2/OXA1L/GRPEL1/RHOT2/ATP6V1E1/NDUFV2/PDHX/RHOT1/COX6A1/ECI1/TOMM70/CASP7/ETFDH/ATP6V1H/NDUFA2/CS/COX7C/NDUFA5/GOT2/COX17/SURF1/ALDH6A1/ATP5MC2/CPT1A/…
HALLMARK_PROTEIN_SECRETION	96	-0.412389	-1.84965	2.64861358095678e-05	6.97003573935994e-05	1.32063835061557e-05	7390	tags=42%, list=13%, signal=36%	VPS4B/GALC/NAPG/USO1/ERGIC3/SEC24D/VAMP4/GOSR2/STX16/GOLGA4/LMAN1/RAB22A/AP3B1/ICA1/RAB14/SNAP23/TMED2/SNX2/OCRL/MON2/COPB1/ATP6V1H/TMED10/TMX1/ARFGEF2/ARFIP1/CLCN3/GBF1/YIPF6/NAPA/TPD52/ARFGEF1/CLTC/COG2/PPT1/TSG101/AP2B1/SCAMP1/KRT18/TOM1L1
HALLMARK_WNT_BETA_CATENIN_SIGNALING	42	0.586991129173056	1.87208268857117	0.000285846047035976	0.00071461511758994	0.000135400759122304	10443	tags=60%, list=18%, signal=49%	NOTCH1/WNT6/GNAI1/TCF7/PTCH1/DKK1/PPARD/WNT5B/FZD8/HEY2/HDAC2/JAG1/WNT1/DLL1/ADAM17/FZD1/DKK4/NOTCH4/JAG2/MYC/NKD1/HEY1/CCND2/SKP2/CUL1
HALLMARK_APOPTOSIS	161	0.408874354954159	1.55738080823574	0.00139472375685632	0.00332077084965791	0.000629198687303604	9945	tags=38%, list=18%, signal=31%	ANXA1/EMP1/GSN/ATF3/BMP2/BTG3/IL6/GPX3/BCL2L10/IFNGR1/CCNA1/EREG/CFLAR/SOD2/LGALS3/LMNA/FAS/MCL1/APP/BIRC3/CAV1/PRF1/CASP4/TSPO/SATB1/SAT1/CD38/TNF/TNFRSF12A/PLPPR4/CD69/CASP1/CD2/NEDD9/JUN/TGFB2/PPP3R1/ISG20/IL18/ANKH/BID/IL1A/CD14/GNA15/GADD45B/PLCB2/IFNB1/GADD45A/TIMP2/AVPR1A/PEA15/IL1B/FEZ1/CCND2/IGF2R/DAP/FASLG/CDC25B/NEFH/MMP2/TAP1
HALLMARK_UNFOLDED_PROTEIN_RESPONSE	112	-0.331823	-1.52975	0.00258167482536225	0.0058674427849142	0.00111172600135216	7376	tags=29%, list=13%, signal=26%	IARS1/SDAD1/CNOT4/EIF4A3/DCP1A/GOSR2/EIF4A2/LSM1/EEF2/BAG3/ERN1/NPM1/NOLC1/NOP14/NHP2/EXOSC2/EXOC2/CNOT6/DCTN1/EIF4E/MTREX/EDEM1/DCP2/PARN/CNOT2/SLC30A5/DNAJA4/SLC1A4/STC2/HSPA9/SPCS1/WFS1/XBP1
HALLMARK_BILE_ACID_METABOLISM	112	-0.329203	-1.51768	0.00308850085623614	0.00648528722373243	0.00122879126344404	4105	tags=28%, list=7%, signal=26%	PEX1/LONP2/PXMP2/PEX11A/PEX7/SERPINA6/HACL1/CROT/SULT2B1/AMACR/SLC22A18/BCAR3/RXRA/PEX11G/FDXR/PECR/DIO1/EFHC1/ABCA3/PFKM/DHCR24/AR/ISOC1/SLC23A1/PEX19/HSD17B4/PEX12/SLC27A2/NUDT12/ABCD3/ABCA2
HALLMARK_HEME_METABOLISM	199	-0.274812	-1.32241	0.00311293786739157	0.00648528722373243	0.00122879126344404	6232	tags=26%, list=11%, signal=23%	ELL2/LRP10/EPB41/BLVRB/ISCA1/TRIM58/TRAK2/NCOA4/MARCHF8/GLRX5/MKRN1/CDC27/BNIP3L/EIF2AK1/ARHGEF12/TENT5C/RBM5/EZH1/OSBP2/SELENBP1/PRDX2/ALAD/ADIPOR1/KHNYN/PIGQ/TOP1/ATP6V0A1/GDE1/PSMD9/ADD1/CLCN3/SLC22A4/FN3K/BTG2/ALDH6A1/MINPP1/BLVRA/HEBP1/FECH/GAPVD1/DCAF10/RNF123/HAGH/DCAF11/BCAM/BTRC/EPOR/TMEM9B/H1-0/VEZF1/NUDT4/SLC25A38
HALLMARK_PEROXISOME	104	-0.336931	-1.53912	0.00353353493824759	0.00706706987649517	0.00133902376607277	8383	tags=35%, list=15%, signal=30%	SOD1/SCP2/FIS1/CRABP2/VPS4B/MVP/ACOT8/RETSAT/SLC25A4/PEX11B/TOP2A/CRAT/FADS1/LONP2/PEX11A/SERPINA6/SULT2B1/IDE/SEMA3C/PEX2/RDH11/ABCB9/DLG4/HMGCL/CDK7/SLC25A17/DIO1/ECI2/ABCC5/DHCR24/ELOVL5/ISOC1/HSD17B4/SLC27A2/ABCD3/ABCC8
HALLMARK_P53_PATHWAY	199	0.369000914888618	1.43393032666172	0.00469239083575815	0.00889710097467909	0.00168576650046551	6644	tags=28%, list=12%, signal=25%	KLK8/KRT17/SERPINB5/NOTCH1/EPHA2/TGFA/PERP/ATF3/BMP2/TM4SF1/PTPN14/CD82/STEAP3/S100A10/LIF/UPP1/RAP2B/LDHB/FAS/HBEGF/TCN2/ST14/ITGB4/RRAD/SOCS1/PPP1R15A/SPHK1/SFN/APP/RNF19B/S100A4/CCND3/PRMT2/TNFSF9/SAT1/CDKN2A/IRAK1/KLF4/PLK3/SDC1/CASP1/CLCA2/BAK1/JUN/TPD52L1/TAX1BP3/ZFP36L1/FGF13/CDKN2B/ADA/RPS12/PDGFA/ZMAT3/IL1A/NDRG1/IRAG2
HALLMARK_FATTY_ACID_METABOLISM	157	-0.29348	-1.38246	0.00480443452632671	0.00889710097467909	0.00168576650046551	7347	tags=31%, list=13%, signal=27%	GCDH/ACOT8/RETSAT/PCBD1/CYP4A22/NTHL1/RAP1GDS1/GSTZ1/NBN/AUH/ACSS1/APEX1/CRAT/UBE2L6/CPT2/HSD17B7/CYP4A11/ACO2/SERINC1/ACOT2/CRYZ/REEP6/ALDH3A2/ALAD/ECI1/ETFDH/SUCLG2/RDH11/GPD2/XIST/RDH16/ADIPOR2/ALDOA/PSME1/BLVRA/HMGCL/GLUL/CPT1A/BMPR1B/ECI2/DHCR24/FASN/ELOVL5/HSDL2/PDHB/HSD17B4/UGDH/SLC22A5/ENO2
HALLMARK_MYC_TARGETS_V1	199	-0.267171	-1.28565	0.00576349153931118	0.0102919491773414	0.00195005352833837	9814	tags=29%, list=17%, signal=24%	NDUFAB1/GNL3/MCM2/CLNS1A/HSPD1/CBX3/SNRPD3/HNRNPR/SET/PWP1/TRIM28/HNRNPA1/RUVBL2/PA2G4/IARS1/EIF1AX/SF3A1/TUFM/COPS5/RPL22/HPRT1/EIF4G2/NAP1L1/CDK2/NME1/APEX1/HNRNPA2B1/VDAC1/CSTF2/HNRNPU/ORC2/NCBP2/NPM1/NOLC1/SRSF1/DHX15/GLO1/NHP2/ERH/RSL1D1/PSMD3/CANX/PSMC6/TOMM70/PSMA6/EIF4E/RAD23B/RRM1/GOT2/KPNB1/HNRNPC/IMPDH2/PTGES3/CCT2/GSPT1/FAM120A/PRDX3/BUB3
HALLMARK_HEDGEHOG_SIGNALING	36	0.513054893751497	1.59164577763952	0.0131724074839689	0.0227110473861533	0.00430314582053431	7513	tags=47%, list=13%, signal=41%	ETS2/CDK6/PML/TLE1/VLDLR/L1CAM/PTCH1/HEY2/DPYSL2/ACHE/ADGRG1/NRP2/NRP1/GLI1/AMOT/CNTFR/PLG
HALLMARK_XENOBIOTIC_METABOLISM	199	0.354604766028516	1.37798717420675	0.0141062886518999	0.0230028642423957	0.00435843743540129	7924	tags=31%, list=14%, signal=26%	ETS2/EPHA2/NDRG2/FETUB/HSD17B2/AKR1C2/GCNT2/AKR1C3/PROS1/UPP1/SMOX/ALDH3A1/ABCD2/FAS/PGRMC1/HSD11B1/DDC/CYP27A1/ATOH8/PPARD/KARS1/LCAT/ADH1C/GCKR/VNN1/GABARAPL1/PTGDS/CRP/RBP4/IGF1/REG1A/POR/CYP1A2/FMO3/ABCC2/TGFB2/ADH7/CYP2C18/IL1R1/KYNU/SLC22A1/HRG/CDA/CD36/FMO1/CBR1/AQP9/AP4B1/CES1/IRF8/CCL25/FABP1/TNFRSF1A/ITIH1/XDH/PLG/TMEM176B/CDO1/PSMB10/SLC12A4/SERPINE1
HALLMARK_MTORC1_SIGNALING	200	-0.265397	-1.2787	0.0142617758302853	0.0230028642423957	0.00435843743540129	7328	tags=26%, list=13%, signal=23%	ATP2A2/PSMD12/USO1/COPS5/TCEA1/HPRT1/GGA2/P4HA1/UNG/GSR/SLC6A6/FADS1/ATP6V1D/TRIB3/IGFBP5/SQSTM1/TM7SF2/TUBG1/ACACA/ACLY/NMT1/INSIG1/STC1/ACSL3/CANX/HMGCR/PSMC6/LTA4H/CYP51A1/ELOVL6/HK2/EDEM1/RDH11/TBK1/FDXR/ADIPOR2/BTG2/ALDOA/QDPR/SCD/DHFR/DHCR24/HSPA4/TMEM97/SLC1A4/ELOVL5/HSPA9/SORD/SYTL2/BHLHE40/SLC9A3R1/XBP1
HALLMARK_SPERMATOGENESIS	134	0.378595582117227	1.42042367352677	0.0187301305768746	0.0292658290263666	0.00554510444710104	7717	tags=29%, list=14%, signal=25%	ART3/TLE4/POMC/TKTL1/SNAP91/NOS1/LPIN1/TULP2/CCNA1/DMRT1/IL12RB2/SCG3/ARL4A/DCC/CRISP2/GFI1/CSNK2A2/PSMG1/CLVS1/CFTR/PCSK1N/PACRG/AGFG1/TCP11/SHE/ZPBP/SEPTIN4/ADCYAP1/RPL39L/IL13RA2/MTNR1A/SYCP1/NPY5R/GPR182/TTK/CHFR/DDX25/SLC2A5/CAMK4
HALLMARK_NOTCH_SIGNALING	32	0.515424780643745	1.55939924070639	0.020033379079881	0.0303536046664864	0.00575120930522901	6635	tags=44%, list=12%, signal=39%	MAML2/NOTCH1/ST3GAL6/DTX2/DTX1/FZD7/TCF7L2/PRKCA/PPARD/DTX4/JAG1/NOTCH3/DLL1/FZD1
HALLMARK_UV_RESPONSE_DN	144	0.364519937994502	1.3749220137631	0.0277469478357381	0.040804335052556	0.0077313476941685	8287	tags=31%, list=15%, signal=27%	MET/NFIB/PTGFR/KIT/FYN/SCHIP1/CACNA1A/RND3/ANXA4/PIK3CD/TFPI/ADGRL2/VLDLR/PRKCA/ID1/FBLN5/ADORA2B/GRK5/CELF2/MAP1B/ADD3/CAV1/ANXA2/PTPN21/CCN1/ARHGEF9/AKT3/KALRN/SNAI2/RASA2/HAS2/F3/TENT4A/LTBP1/PLCB4/NRP1/TGFBR2/PLPP3/ACVR2A/DLC1/PPARG/SERPINE1/LAMC1/MYC/MT1E
HALLMARK_UV_RESPONSE_UP	158	0.34853379386414	1.32668071981884	0.0332963374028857	0.0464153099114539	0.00879447977269652	9091	tags=32%, list=16%, signal=27%	CXCL2/ATF3/BMP2/LYN/BTG3/IL6/GAL/GPX3/SOD2/TYRO3/AQP3/RRAD/CCNE1/PDLIM3/AMD1/KLHDC3/SHOX2/ICAM1/GLS/CCND3/HLA-F/CCK/TUBA4A/MGAT1/CDKN1C/BAK1/CREG1/CHRNA5/CTSV/NKX2-5/CDKN2B/JUNB/EPCAM/FMO1/ABCB1/BID/CEBPG/FOSB/NR4A1/RAB27A/CLTB/CNP/HYAL2/CDO1/PPIF/MMP14/AGO2/CDC34/STK25/C4BPB/GGH
HALLMARK_ANGIOGENESIS	36	0.464408688097303	1.4407310728571	0.0334190231362468	0.0464153099114539	0.00879447977269652	11902	tags=47%, list=21%, signal=37%	CXCL6/PRG2/TNFRSF21/LPL/APP/S100A4/PF4/JAG1/SLCO2A1/NRP1/FSTL1/PDGFA/JAG2/CCND2/THBD/KCNJ8/APOH
HALLMARK_GLYCOLYSIS	199	0.334272674158287	1.29897706349742	0.0355603448275862	0.0472894905797868	0.00896011400459119	11256	tags=32%, list=20%, signal=25%	EGFR/MET/TGFA/DSC2/CHST2/B3GNT3/UGP2/CHST4/CHST6/TKTL1/ANGPTL4/PLOD1/B3GAT1/RRAGD/VLDLR/LCT/SOX9/ADORA2B/PFKP/GPR87/ENO1/ELF3/IGFBP3/PAM/CLDN9/SDC1/CAPN5/ISG20/EXT2/NDST3/EFNA3/NT5E/PYGB/DPYSL4/GAL3ST1/LHPP/NASP/KDELR3/AK3/B4GALT2/EXT1/ME1/AGRN/MDH1/ME2/SDC3/STMN1/MDH2/SLC25A13/GYS2/CENPA/HS6ST2/GALK1/CHPF2/CLDN3/CXCR4/TPST1/SDC2/TALDO1/GAPDHS/HOMER1/CHST12/CHPF
HALLMARK_REACTIVE_OXYGEN_SPECIES_PATHWAY	49	0.447975745512513	1.4695733144035	0.035940012840638	0.0472894905797868	0.00896011400459119	9105	tags=33%, list=16%, signal=27%	PRNP/GPX3/FES/SOD2/MSRA/PFKP/MPO/IPCEF1/MBP/JUNB/MGST1/LSP1/SBNO2/PRDX4/STK25/FTL
HALLMARK_E2F_TARGETS	200	-0.252731	-1.21767	0.0372888941311875	0.0478062745271634	0.00905803096304149	7754	tags=24%, list=14%, signal=21%	ATAD2/DCTPP1/PA2G4/CSE1L/CBX5/SMC1A/NAP1L1/SPAG5/PNN/RACGAP1/NBN/NME1/KIF22/UNG/TOP2A/LIG1/NUP107/RPA3/PPM1D/CDKN1B/CTCF/RAD21/RAD1/HELLS/ORC2/DCK/NOLC1/PDS5B/SRSF1/SMC3/TUBG1/PMS2/RBBP7/PSMC3IP/PAICS/IPO7/BRCA1/LUC7L3/RAD51C/RFC1/TIMELESS/UBR7/GSPT1/CCP110/RAD50/WDR90/PAN2/MLH1
HALLMARK_INTERFERON_ALPHA_RESPONSE	97	0.379454062488299	1.3771346528482	0.0409356725146199	0.0507489311967521	0.00961558696359513	15879	tags=41%, list=28%, signal=30%	NCOA7/LAMP3/NMI/C1S/RTP4/CASP1/IL15/PLSCR1/ISG20/IL4R/SELL/CNP/RIPK2/CXCL10/CXCL11/LY6E/TRIM26/IL7/TENT5A/IFI44/WARS1/CD47/TAP1/HERC6/HLA-C/IRF1/EPSTI1/PSMB9/IFIH1/IFI30/GBP4/PSMB8/SAMD9L/CD74/CMPK2/GBP2/B2M/IFI44L/MX1/IFITM3
HALLMARK_APICAL_SURFACE	44	0.445651034922002	1.43491198233685	0.0416141235813367	0.0507489311967521	0.00961558696359513	7607	tags=43%, list=13%, signal=37%	RHCG/CX3CL1/EFNA5/LYN/MAL/PKHD1/PCSK9/APP/PLAUR/IL2RG/ATP6V0A4/GHRL/GAS1/SRPX/AKAP7/DCBLD2/EPHB4/SLC2A4/NTNG1
