# Supplementary material for: Integrated bulk RNA and single-cell RNA sequencing to identify and validate exercise-related genes for predicting the prognosis of invasive ductal carcinoma
Source: Research Square preprint supplement (doi:10.21203/rs.3.rs-8444169/v1), 2026-01-16
Supplement: Supplementary file 11 [file aa4a964ee9578108ed3ac514.xlsx]

## Sheet: Sheet1
Multivariate cox regression analysis and PH hypothesis test
	chisq	df	p
risk score	0.11	1	0.74
tumor stage	6.84	3	0.08
age	4.69	1	0.03
