# Supplementary material for: Integrated bulk RNA and single-cell RNA sequencing to identify and validate exercise-related genes for predicting the prognosis of invasive ductal carcinoma
Source: Research Square preprint supplement (doi:10.21203/rs.3.rs-8444169/v1), 2026-01-16
Supplement: Supplementary file 12 [file ab9e38eb5accc3bbdad90fbf.xlsx]

## Sheet: Supplementary Table 8
Drug sensitivity analyses of anticancer drugs.
no.	drug	.y.	group1	group2	n1	n2	statistic	p	p.adj	p.adj.signif	sig
1	A.443654	value	High	Low	263	263	43970	7.26e-08	1.23688888888889e-07	****	A.443654****
2	A.770041	value	High	Low	263	263	57298	8.07e-39	9.2805e-38	****	A.770041****
3	ABT.888	value	High	Low	263	263	49648	5.5e-18	1.61489361702128e-17	****	ABT.888****
4	AICAR	value	High	Low	263	263	49380	2.09e-17	5.7684e-17	****	AICAR****
5	AP.24534	value	High	Low	263	263	56489	3.18e-36	2.58141176470588e-35	****	AP.24534****
6	AS601245	value	High	Low	263	263	57282	9.1e-39	9.66e-38	****	AS601245****
7	ATRA	value	High	Low	263	263	44763	5.23e-09	9.13594936708861e-09	****	ATRA****
8	AUY922	value	High	Low	263	263	54633	1.28e-30	7.36e-30	****	AUY922****
9	AZ628	value	High	Low	263	263	57720	3.28e-40	5.02933333333333e-39	****	AZ628****
10	AZD.0530	value	High	Low	263	263	48956	1.64e-16	4.27018867924528e-16	****	AZD.0530****
11	AZD.2281	value	High	Low	263	263	38548	0.023	0.0273620689655172	*	AZD.2281*
12	AZD6244	value	High	Low	263	263	46300	1.8e-11	3.6e-11	****	AZD6244****
13	AZD6482	value	High	Low	263	263	43515	3e-07	4.87058823529412e-07	****	AZD6482****
14	AZD7762	value	High	Low	263	263	47073	7.77e-13	1.64963076923077e-12	****	AZD7762****
15	AZD8055	value	High	Low	263	263	49634	5.9e-18	1.69625e-17	****	AZD8055****
16	Axitinib	value	High	Low	263	263	44396	1.81e-08	3.12225e-08	****	Axitinib****
17	BAY.61.3606	value	High	Low	263	263	45725	1.64e-10	3.10027397260274e-10	****	BAY.61.3606****
18	BI.2536	value	High	Low	263	263	48577	9.9e-16	2.484e-15	****	BI.2536****
19	BIBW2992	value	High	Low	263	263	27551	5.45e-05	7.5969696969697e-05	****	BIBW2992****
20	BIRB.0796	value	High	Low	263	263	14465	7.97e-31	4.99936363636364e-30	****	BIRB.0796****
21	BMS.509744	value	High	Low	263	263	51508	2.74e-22	9.69538461538462e-22	****	BMS.509744****
22	BMS.536924	value	High	Low	263	263	51197	1.55e-21	5.21707317073171e-21	****	BMS.536924****
23	BMS.708163	value	High	Low	263	263	18489	2.59e-20	8.12318181818182e-20	****	BMS.708163****
24	BMS.754807	value	High	Low	263	263	23773	5.54e-10	1.01936e-09	****	BMS.754807****
25	BX.795	value	High	Low	263	263	43194	7.83e-07	1.21408988764045e-06	****	BX.795****
26	Bexarotene	value	High	Low	263	263	52851	1.06e-25	4.43272727272727e-25	****	Bexarotene****
27	Bleomycin	value	High	Low	263	263	39778	0.00289	0.00356089285714286	**	Bleomycin**
28	Bortezomib	value	High	Low	263	263	41641	5.16e-05	7.26612244897959e-05	****	Bortezomib****
29	Bosutinib	value	High	Low	263	263	50007	8.87e-19	2.72013333333333e-18	****	Bosutinib****
30	CCT007093	value	High	Low	263	263	53734	4.42e-28	2.17842857142857e-27	****	CCT007093****
31	CCT018159	value	High	Low	263	263	22481	3.81e-12	7.84746268656716e-12	****	CCT018159****
32	CEP.701	value	High	Low	263	263	45226	1.03e-09	1.87026315789474e-09	****	CEP.701****
33	CGP.082996	value	High	Low	263	263	51563	2.01e-22	7.29947368421053e-22	****	CGP.082996****
34	CGP.60474	value	High	Low	263	263	48542	1.17e-15	2.88321428571429e-15	****	CGP.60474****
35	CHIR.99021	value	High	Low	263	263	47181	4.94e-13	1.09954838709677e-12	****	CHIR.99021****
36	CI.1040	value	High	Low	263	263	46853	1.94e-12	4.05636363636364e-12	****	CI.1040****
37	CMK	value	High	Low	263	263	38236	0.0362	0.0426974358974359	*	CMK*
38	Camptothecin	value	High	Low	263	263	42814	2.34e-06	3.51e-06	****	Camptothecin****
39	Cisplatin	value	High	Low	263	263	28160	0.000228	0.000308470588235294	***	Cisplatin***
40	Cyclopamine	value	High	Low	263	263	57756	2.49e-40	4.29525e-39	****	Cyclopamine****
41	Cytarabine	value	High	Low	263	263	54173	2.63e-29	1.45176e-28	****	Cytarabine****
42	DMOG	value	High	Low	263	263	51886	3.19e-23	1.25777142857143e-22	****	DMOG****
43	Dasatinib	value	High	Low	263	263	47995	1.42e-14	3.266e-14	****	Dasatinib****
44	Docetaxel	value	High	Low	263	263	28166	0.000231	0.000309495145631068	***	Docetaxel***
45	Doxorubicin	value	High	Low	263	263	43099	1.03e-06	1.56197802197802e-06	****	Doxorubicin****
46	EHT.1864	value	High	Low	263	263	49350	2.42e-17	6.54823529411765e-17	****	EHT.1864****
47	Elesclomol	value	High	Low	263	263	41705	4.4e-05	6.25979381443299e-05	****	Elesclomol****
48	Embelin	value	High	Low	263	263	57580	9.55e-40	1.3179e-38	****	Embelin****
49	Epothilone.B	value	High	Low	263	263	40487	0.000708	0.000921735849056604	***	Epothilone.B***
50	Erlotinib	value	High	Low	263	263	39963	0.00203	0.00257009174311927	**	Erlotinib**
51	Etoposide	value	High	Low	263	263	54766	5.26e-31	3.45657142857143e-30	****	Etoposide****
52	FH535	value	High	Low	263	263	53584	1.14e-27	5.4248275862069e-27	****	FH535****
53	FTI.277	value	High	Low	263	263	29695	0.00503	0.00614283185840708	**	FTI.277**
54	GDC0941	value	High	Low	263	263	39289	0.00696	0.008352	**	GDC0941**
55	GNF.2	value	High	Low	263	263	40388	0.00087	0.00112205607476636	**	GNF.2**
56	GSK.650394	value	High	Low	263	263	48384	2.43e-15	5.68372881355932e-15	****	GSK.650394****
57	GSK269962A	value	High	Low	263	263	44861	3.73e-09	6.68493506493507e-09	****	GSK269962A****
58	GW.441756	value	High	Low	263	263	13775	7.38e-33	5.36021052631579e-32	****	GW.441756****
59	GW843682X	value	High	Low	263	263	53363	4.56e-27	2.02993548387097e-26	****	GW843682X****
60	Gefitinib	value	High	Low	263	263	46554	6.54e-12	1.32723529411765e-11	****	Gefitinib****
61	Gemcitabine	value	High	Low	263	263	53857	2.02e-28	1.03244444444444e-27	****	Gemcitabine****
62	IPA.3	value	High	Low	263	263	52146	7.07e-24	2.86958823529412e-23	****	IPA.3****
63	Imatinib	value	High	Low	263	263	47234	3.94e-13	8.91344262295082e-13	****	Imatinib****
64	JNJ.26854165	value	High	Low	263	263	44799	4.62e-09	8.17384615384615e-09	****	JNJ.26854165****
65	JNK.9L	value	High	Low	263	263	59143	4.35e-45	1.0005e-43	****	JNK.9L****
66	JNK.Inhibitor.VIII	value	High	Low	263	263	27806	0.000101	0.00013938	***	JNK.Inhibitor.VIII***
67	JW.7.52.1	value	High	Low	263	263	55355	9.65e-33	6.6585e-32	****	JW.7.52.1****
68	KIN001.135	value	High	Low	263	263	29088	0.00161	0.00205722222222222	**	KIN001.135**
69	KU.55933	value	High	Low	263	263	47134	6.02e-13	1.31866666666667e-12	****	KU.55933****
70	LFM.A13	value	High	Low	263	263	25415	1.43e-07	2.37759036144578e-07	****	LFM.A13****
71	Lenalidomide	value	High	Low	263	263	51846	4.01e-23	1.53716666666667e-22	****	Lenalidomide****
72	MS.275	value	High	Low	263	263	60358	1.76e-49	8.096e-48	****	MS.275****
73	Metformin	value	High	Low	263	263	29320	0.00253	0.003174	**	Metformin**
74	Midostaurin	value	High	Low	263	263	51048	3.53e-21	1.13288372093023e-20	****	Midostaurin****
75	Mitomycin.C	value	High	Low	263	263	25984	8.04e-07	1.2328e-06	****	Mitomycin.C****
76	NSC.87877	value	High	Low	263	263	42127	1.51e-05	2.170625e-05	****	NSC.87877****
77	NU.7441	value	High	Low	263	263	43505	3.09e-07	4.95837209302325e-07	****	NU.7441****
78	NVP.BEZ235	value	High	Low	263	263	45664	2.06e-10	3.84162162162162e-10	****	NVP.BEZ235****
79	Nilotinib	value	High	Low	263	263	51615	1.5e-22	5.5945945945946e-22	****	Nilotinib****
80	Nutlin.3a	value	High	Low	263	263	46186	2.81e-11	5.46169014084507e-11	****	Nutlin.3a****
81	OSI.906	value	High	Low	263	263	25925	6.76e-07	1.06009090909091e-06	****	OSI.906****
82	Obatoclax.Mesylate	value	High	Low	263	263	49875	1.74e-18	5.22e-18	****	Obatoclax.Mesylate****
83	PAC.1	value	High	Low	263	263	48472	1.62e-15	3.85448275862069e-15	****	PAC.1****
84	PD.0325901	value	High	Low	263	263	26754	7.04e-06	1.04464516129032e-05	****	PD.0325901****
85	PD.0332991	value	High	Low	263	263	45842	1.06e-10	2.03166666666667e-10	****	PD.0332991****
86	PD.173074	value	High	Low	263	263	47092	7.18e-13	1.5481875e-12	****	PD.173074****
87	PF.02341066	value	High	Low	263	263	57077	4.22e-38	4.15971428571429e-37	****	PF.02341066****
88	PF.4708671	value	High	Low	263	263	20054	7.64e-17	2.02753846153846e-16	****	PF.4708671****
89	PF.562271	value	High	Low	263	263	42216	1.2e-05	1.76170212765957e-05	****	PF.562271****
90	PHA.665752	value	High	Low	263	263	19609	8.54e-18	2.40514285714286e-17	****	PHA.665752****
91	PLX4720	value	High	Low	263	263	41283	0.000122	0.000166693069306931	***	PLX4720***
92	Paclitaxel	value	High	Low	263	263	43735	1.52e-07	2.49714285714286e-07	****	Paclitaxel****
93	Pazopanib	value	High	Low	263	263	55639	1.35e-33	1.035e-32	****	Pazopanib****
94	Pyrimethamine	value	High	Low	263	263	53537	1.54e-27	7.084e-27	****	Pyrimethamine****
95	QS11	value	High	Low	263	263	56876	1.87e-37	1.612875e-36	****	QS11****
96	RO.3306	value	High	Low	263	263	15877	7.1e-27	3.061875e-26	****	RO.3306****
97	Rapamycin	value	High	Low	263	263	46278	1.96e-11	3.864e-11	****	Rapamycin****
98	Roscovitine	value	High	Low	263	263	48721	5.03e-16	1.28544444444444e-15	****	Roscovitine****
99	S.Trityl.L.cysteine	value	High	Low	263	263	57518	1.53e-39	1.91945454545455e-38	****	S.Trityl.L.cysteine****
100	SB.216763	value	High	Low	263	263	29388	0.00287	0.00356089285714286	**	SB.216763**
101	SB590885	value	High	Low	263	263	38187	0.0388	0.0453762711864407	*	SB590885*
102	Salubrinal	value	High	Low	263	263	60016	3.19e-48	1.10055e-46	****	Salubrinal****
103	Shikonin	value	High	Low	263	263	54662	1.05e-30	6.3e-30	****	Shikonin****
104	Sorafenib	value	High	Low	263	263	29793	0.00598	0.00723894736842105	**	Sorafenib**
105	Sunitinib	value	High	Low	263	263	61757	8.49e-55	5.8581e-53	****	Sunitinib****
106	TW.37	value	High	Low	263	263	51236	1.25e-21	4.3125e-21	****	TW.37****
107	Temsirolimus	value	High	Low	263	263	40553	0.000617	0.000810914285714286	***	Temsirolimus***
108	Thapsigargin	value	High	Low	263	263	43875	9.81e-08	1.6509512195122e-07	****	Thapsigargin****
109	Tipifarnib	value	High	Low	263	263	59830	1.52e-47	4.1952e-46	****	Tipifarnib****
110	VX.680	value	High	Low	263	263	57044	5.39e-38	4.9588e-37	****	VX.680****
111	VX.702	value	High	Low	263	263	40638	0.000515	0.000683365384615385	***	VX.702***
112	Vinblastine	value	High	Low	263	263	48494	1.46e-15	3.53473684210526e-15	****	Vinblastine****
113	Vinorelbine	value	High	Low	263	263	63431	1.58e-61	2.1804e-59	****	Vinorelbine****
114	WH.4.023	value	High	Low	263	263	54043	6.1e-29	3.23769230769231e-28	****	WH.4.023****
115	WZ.1.84	value	High	Low	263	263	43334	5.17e-07	8.20068965517241e-07	****	WZ.1.84****
116	XMD8.85	value	High	Low	263	263	57852	1.19e-40	2.346e-39	****	XMD8.85****
117	Z.LLNle.CHO	value	High	Low	263	263	51096	2.71e-21	8.90428571428572e-21	****	Z.LLNle.CHO****
118	ZM.447439	value	High	Low	263	263	42206	1.23e-05	1.78673684210526e-05	****	ZM.447439****
