# Supplementary material for: Integrated bulk RNA and single-cell RNA sequencing to identify and validate exercise-related genes for predicting the prognosis of invasive ductal carcinoma
Source: Research Square preprint supplement (doi:10.21203/rs.3.rs-8444169/v1), 2026-01-16
Supplement: Supplementary file 13 [file ae91cf1f6877311db89f1925.xlsx]

## Sheet: Supplementary Table 14
Gene set enrichment analysis (GSEA) pathways for GYPC
ID	setSize	enrichmentScore	NES	pvalue	p.adjust	qvalue	rank	leading_edge	core_enrichment
HALLMARK_ALLOGRAFT_REJECTION	200	0.798889642342759	2.84444547384574	1e-10	2.94117647058824e-10	5.57275541795666e-11	5746	tags=72%, list=10%, signal=65%	CD40/NCF4/WAS/HCLS1/FGR/SPI1/ETS1/IL16/CD1D/SRGN/HLA-E/ITGB2/CD3D/SIT1/CD4/LTB/IL2RG/IL12RB1/CD3E/LCK/CCL5/PRF1/GZMA/HLA-DMA/CD247/CCND2/STAB1/CCL19/CXCR3/CRTAM/LY86/CD74/ZAP70/CD40LG/CD2/MAP4K1/LYN/HLA-DMB/LCP2/NLRP3/PRKCB/FAS/HLA-DRA/IRF8/CD7/CD28/HLA-DOA/CSF1/CD96/CD8B/HLA-DOB/CD3G/IL6/SOCS1/CCR2/CCR5/STAT4/FCGR2B/CCL4/ITK/TRAT1/CD79A/HLA-DQA1/IRF4/GZMB/TGFB1/CD8A/KLRD1/CD86/CTSS/CCL2/IL18RAP/…
HALLMARK_EPITHELIAL_MESENCHYMAL_TRANSITION	200	0.771145530745838	2.74566260262675	1e-10	2.94117647058824e-10	5.57275541795666e-11	7531	tags=69%, list=13%, signal=60%	EMP3/VIM/FBLN5/IL32/WIPF1/NNMT/GLIPR1/FAS/GPX7/SERPINE2/TPM2/PTX3/FBLN2/IL6/COL16A1/TAGLN/MYL9/GAS1/TNFAIP3/TGFB1/PCOLCE/VCAM1/COL6A2/PCOLCE2/P3H1/EFEMP2/CCN1/ABI3BP/SERPINH1/SFRP1/CXCL12/BMP1/BGN/COL4A2/GEM/MMP2/DAB2/ELN/SNAI2/IL15/ACTA2/FLNA/FBLN1/FSTL1/CXCL1/LGALS1/CCN2/VEGFC/LRP1/THY1/DPYSL3/TGM2/PLAUR/TIMP1/PDLIM4/IGFBP3/ITGA5/FGF2/SFRP4/DCN/CALD1/PLOD1/NT5E/CXCL6/MYLK/CAPG/FOXC2/PRRX1/MMP3/…
HALLMARK_TNFA_SIGNALING_VIA_NFKB	199	0.745342233255141	2.64979976018377	1e-10	2.94117647058824e-10	5.57275541795666e-11	6170	tags=62%, list=11%, signal=55%	MSC/IL15RA/CCL5/GPR183/BMP2/GFPT2/PTGER4/TRAF1/SPHK1/NFKBIE/BCL2A1/PTX3/PLEK/RELB/G0S2/CSF1/IL6/CD69/IL7R/CCL4/TNFAIP3/SGK1/SOCS3/CCL2/EGR2/TNFRSF9/TNFAIP8/CXCL2/SLC2A3/CCN1/ICAM1/PPP1R15A/CD83/ETS2/PLPP3/NFKB2/SPSB1/GEM/TRIP10/FOSL1/FUT4/KLF2/IL18/PNRC1/CCRL2/IL12B/BIRC3/IRF1/CXCL1/HBEGF/TLR2/DUSP2/NR4A3/JUNB/TNIP1/SOD2/EHD1/EDN1/RCAN1/STAT5A/ZFP36/PLAUR/CXCL3/SERPINB8/LIF/ATF3/PTGS2/SLC2A6/CXCL…
HALLMARK_INFLAMMATORY_RESPONSE	199	0.73282593983645	2.60530252143964	1e-10	2.94117647058824e-10	5.57275541795666e-11	6960	tags=64%, list=12%, signal=57%	TNFRSF1B/CD40/CHST2/EMP3/SCARF1/CD48/IL15RA/LCK/CCL5/EBI3/IL10RA/GPR183/PTGIR/STAB1/CD14/SLAMF1/RHOG/PTGER4/IL18R1/LYN/LCP2/NLRP3/SPHK1/PIK3R5/CSF1/CX3CL1/IL6/CD69/IL7R/PTAFR/CMKLR1/TACR1/CCR7/CXCR6/LTA/CCL2/IL18RAP/CD70/FPR1/TNFRSF9/CCL17/ICAM1/ADGRE1/IL2RB/CCL24/APLNR/MARCO/SELL/C3AR1/CYBB/LAMP3/CCL22/IL15/IL18/CCRL2/KCNA3/IL12B/SELE/IRF1/PDPN/IL4R/HBEGF/TLR2/GPR132/HAS2/EDN1/AXL/IL10/CXCL9/PLA…
HALLMARK_INTERFERON_GAMMA_RESPONSE	199	0.731508167275675	2.60061764882714	1e-10	2.94117647058824e-10	5.57275541795666e-11	8545	tags=65%, list=15%, signal=55%	C1R/C1S/CD40/SERPING1/VAMP5/CSF2RB/IL15RA/CCL5/GZMA/HLA-DMA/IL10RA/HLA-DRB1/CD74/PIM1/LCP2/FAS/IRF8/IL18BP/P2RY14/IL6/SOCS1/CD69/UPP1/STAT4/PML/CMKLR1/TNFAIP3/HLA-DQA1/IRF4/BANK1/PLA2G4A/CASP1/SOCS3/FGL2/CD86/CCL2/VCAM1/FPR1/CIITA/ST8SIA4/IFNAR2/SELP/ICAM1/PSMB10/IL2RB/SLAMF7/CASP4/FCGR1A/XCL1/CFH/GPR18/CD38/HLA-A/PSMB9/IL15/IRF1/IL4R/HLA-B/ITGB7/SOD2/IL7/SSPN/CXCL9/SAMHD1/IDO1/NLRC5/B2M/EPSTI1/Z…
HALLMARK_IL6_JAK_STAT3_SIGNALING	87	0.760057692765571	2.53045400055166	1e-10	2.94117647058824e-10	5.57275541795666e-11	5746	tags=68%, list=10%, signal=61%	TNFRSF1B/ACVRL1/CSF2RB/LTB/IL15RA/IL2RG/IL12RB1/A2M/EBI3/CD14/IL18R1/PIM1/FAS/PIK3R5/CSF1/IL3RA/CSF2RA/IL6/SOCS1/TGFB1/IL1R2/SOCS3/IL2RA/PLA2G2A/CD38/IRF1/CXCL1/IL4R/TLR2/TNFRSF1A/CCR1/HMOX1/IL7/CXCL9/CXCL3/CXCL13/IFNGR1/CSF2/ITGA4/CRLF2/IL9R/CD36/CXCL10/IL1B/JUN/MAP3K8/TNF/IL1R1/CXCL11/TNFRSF12A/IFNGR2/TNFRSF21/ITGB3/BAK1/LEPR/IL17RA/OSMR/CNTFR/PF4
HALLMARK_KRAS_SIGNALING_UP	200	0.700472586697097	2.49403168244949	1e-10	2.94117647058824e-10	5.57275541795666e-11	4196	tags=50%, list=7%, signal=46%	GYPC/TNFRSF1B/LY96/ENG/ETS1/CD37/ITGB2/IL2RG/PECAM1/HSD11B1/IL10RA/LAPTM5/BMP2/CCND2/GNG11/IKZF1/LAT2/GFPT2/MAP4K1/TRAF1/FCER1G/IRF8/G0S2/CSF2RA/PDCD1LG2/DOCK2/IL7R/CMKLR1/PLVAP/TNFAIP3/PRDM1/CTSS/TFPI/TSPAN7/IL33/PPP1R15A/TMEM176B/TLR8/TMEM100/TMEM176A/RBP4/MAFB/CFH/KCNN4/C3AR1/ADGRA2/SPRY2/ALDH1A3/ETV5/BIRC3/ABCB1/FLT4/ALDH1A2/CXCR4/HBEGF/LCP1/ADGRL4/GPNMB/PLAUR/FGF9/IGFBP3/CIDEA/ANKH/LIF/NRP1/…
HALLMARK_COAGULATION	138	0.698086492295014	2.42102590926452	1e-10	2.94117647058824e-10	5.57275541795666e-11	8188	tags=52%, list=14%, signal=45%	C1R/C1S/C3/SERPING1/FYN/GSN/C1QA/ANXA1/PECAM1/A2M/CFI/PLEK/PROS1/F10/VWF/BMP1/LEFTY2/CFH/MMP2/DPP4/CTSB/C2/MMP7/LGMN/LRP1/TF/TIMP1/APOC1/CTSK/CAPN5/RGN/MMP9/ITIH1/MMP3/CTSH/MMP14/HTRA1/KLK8/DCT/SERPINE1/CSRP1/PLAU/SH2B2/THBD/ITGB3/GP1BA/MAFF/SPARC/P2RY1/CFD/TFPI2/SIRT2/F3/ISCU/CPQ/PF4/MEP1A/CTSE/COMP/OLR1/FBN1/PROC/MBL2/F2RL2/C8G/MMP8/SERPINA1/DUSP6/KLKB1/GDA/KLF7/S100A1
HALLMARK_COMPLEMENT	200	0.677420938240967	2.41195631979559	1e-10	2.94117647058824e-10	5.57275541795666e-11	7413	tags=56%, list=13%, signal=49%	C1R/C1S/WAS/C3/SERPING1/FYN/GNG2/C1QA/SPOCK2/GNGT2/LCK/CCL5/GZMA/FCN1/GZMK/RHOG/CD40LG/PIM1/LYN/LCP2/FCER1G/C1QC/PLEK/PIK3R5/IL6/TNFAIP3/PIK3CG/GZMB/APOBEC3G/PLA2G4A/CASP1/GNAI2/CTSS/F10/CR1/CASP10/CASP4/COL4A2/DGKG/KLK1/CFH/SH2B3/L3MBTL4/DPP4/CTSB/C2/PSMB9/CTSC/IRF1/ITGAM/CXCL1/LGMN/LRP1/CR2/EHD1/PLAUR/TIMP1/APOC1/PLA2G7/KCNIP2/NOTCH4/PFN1/CEBPB/ITIH1/TIMP2/ANXA5/CPM/F5/CASP5/CTSH/MMP14/CTSL/CD3…
HALLMARK_E2F_TARGETS	200	-0.520469	-2.33128	1e-10	2.94117647058824e-10	5.57275541795666e-11	10745	tags=46%, list=19%, signal=37%	RAD51AP1/NME1/DSCC1/SHMT1/CDKN1B/ASF1B/NUDT21/PNN/RRM2/NOP56/MMS22L/DIAPH3/RFC3/KIF4A/SPC25/MRE11/MTHFD2/KPNA2/UBE2T/STAG1/RAN/GINS4/E2F8/DCK/MCM2/SLBP/MCM4/PCNA/KIF22/CDK1/TMPO/HUS1/TIPIN/BARD1/PPM1D/PDS5B/BRCA2/RPA3/DCTPP1/NOLC1/ESPL1/MAD2L1/PLK4/MSH2/GINS1/BUB1B/HELLS/HMMR/CIT/NUP205/PRKDC/PSMC3IP/SMC4/LUC7L3/SPAG5/UNG/POLE/NUP153/EIF2S1/SMC1A/TUBG1/SMC3/WDR90/CTCF/CENPE/ATAD2/RAD21/TOP2A/WEE1…
HALLMARK_IL2_STAT5_SIGNALING	198	0.653796002385939	2.31996087737879	1e-10	2.94117647058824e-10	5.57275541795666e-11	8396	tags=55%, list=15%, signal=47%	TNFRSF1B/CD79B/TNFRSF8/GLIPR2/BATF3/CST7/CD48/LTB/IL10RA/BMP2/CCND2/TNFRSF4/LRRC8C/IL18R1/PIM1/TRAF1/IRF8/PLAGL1/CSF1/IL3RA/SOCS1/IRF4/EOMES/SYT11/IL1R2/ITIH5/FGL2/CD86/TNFRSF9/SLC2A3/SELP/IL2RA/CD83/CCR4/IL2RB/GPR65/CTSZ/PTH1R/SELL/CTLA4/ADAM19/COL6A1/ICOS/PRNP/ABCB1/IL4R/PLPP1/GSTO1/IL10/TGM2/SHE/LIF/PTGER2/NRP1/PLIN2/NT5E/CD81/CAPG/MYO1E/IFNGR1/TNFSF11/GADD45B/CSF2/GBP4/RGS16/NFIL3/TLR7/PENK/E…
HALLMARK_MYOGENESIS	198	0.642147929074628	2.27862829920385	1e-10	2.94117647058824e-10	5.57275541795666e-11	9620	tags=57%, list=17%, signal=47%	LSP1/TNNI2/GSN/SOD3/KIFC3/BIN1/CRYAB/MEF2C/SPHK1/GPX3/TPM2/MRAS/PYGM/IGFBP7/IGF1/FHL1/TAGLN/TNNT3/TGFB1/PTGIS/DMD/COL6A2/PDLIM7/ITGA7/GJA5/APLNR/COL15A1/COL4A2/PRNP/NOTCH1/DES/COX7A1/HBEGF/WWTR1/SSPN/PKIA/SGCA/IGFBP3/ACHE/FGF2/SCHIP1/MYLK/MYOM1/GADD45B/MYH1/RYR1/MYL2/MYL4/MYH9/SMTN/MYH11/ANKRD2/SORBS3/CD36/NCAM1/DENND2B/MYBPC3/SORBS1/SGCG/AEBP1/MYH3/COL1A1/SPARC/FXYD1/MYH7/COL6A3/MYH8/PTP4A3/MYH2…
HALLMARK_INTERFERON_ALPHA_RESPONSE	97	0.669724660933462	2.25393507362102	1e-10	2.94117647058824e-10	5.57275541795666e-11	12384	tags=67%, list=22%, signal=52%	C1S/CD74/CSF1/CASP1/SELL/PSMB9/LAMP3/IL15/CCRL2/IRF1/GBP2/IL4R/IL7/B2M/EPSTI1/PROCR/NMI/GBP4/HLA-C/IFI30/PSMB8/NCOA7/LPAR6/CXCL10/ISG20/CXCL11/TMEM140/RTP4/TXNIP/TAP1/WARS1/IFITM3/TRIM21/PSME2/SLC25A28/SAMD9L/UBA7/LAP3/LY6E/BATF2/OGFR/IFI44/PLSCR1/NUB1/IFI44L/STAT2/IFI27/CNP/RSAD2/IFIT3/UBE2L6/OASL/IRF2/PARP12/IRF7/HERC6/ISG15/RIPK2/CMPK2/IFI35/MX1/MOV10/IFITM2/CD47/IFIT2
HALLMARK_ESTROGEN_RESPONSE_EARLY	200	-0.492245	-2.20486	1e-10	2.94117647058824e-10	5.57275541795666e-11	6764	tags=46%, list=12%, signal=41%	PMAIP1/ISG20L2/WWC1/KRT19/PDZK1/SEMA3B/HSPB8/DHRS2/PGR/SYNGR1/ASB13/MSMB/CLDN7/KRT8/TFF3/ELOVL2/RHOBTB3/SLC7A2/MED24/ITPK1/SULT2B1/ADCY1/BCL2/KCNK15/FAM102A/RBBP8/IL17RB/MAST4/UGCG/FRK/RAPGEFL1/ELOVL5/SIAH2/ABAT/SLC1A4/IL6ST/RAB17/AFF1/FASN/AMFR/SNX24/PEX11A/TJP3/RARA/ABHD2/ADCY9/AKAP1/KRT18/TPBG/REEP1/KDM4B/RET/TTC39A/SCNN1A/GFRA1/BHLHE40/LRIG1/GREB1/SLC27A2/WFS1/MAPT/ARL3/SYBU/CELSR2/DYNLT3/AR/…
HALLMARK_G2M_CHECKPOINT	200	-0.484386	-2.16966	1e-10	2.94117647058824e-10	5.57275541795666e-11	7617	tags=42%, list=13%, signal=36%	KPNA2/CENPF/STAG1/KIF23/NUP50/MCM2/KIF15/ODF2/GINS2/KIF22/SMAD3/PBK/CDK1/RBL1/TMPO/HUS1/BARD1/PDS5B/TNPO2/KIF11/RBM14/BRCA2/NOLC1/EGF/ESPL1/NEK2/MAD2L1/PLK4/POLQ/G3BP1/CASP8AP2/SLC12A2/CCNF/HMMR/SS18/HSPA8/SQLE/SMC4/CUL4A/POLE/KNL1/CUL5/NUMA1/SMC1A/KIF20B/CDC6/ARID4A/CTCF/CENPE/CDC27/RAD21/SMC2/TOP2A/PURA/PRPF4B/ORC5/SMARCC1/NSD2/H2AZ2/SRSF10/CBX1/NUP98/RACGAP1/KPNB1/ATRX/RPS6KA5/HNRNPU/TLE3/YTHD…
HALLMARK_APICAL_JUNCTION	198	0.604206028110193	2.14399345052071	1e-10	2.94117647058824e-10	5.57275541795666e-11	10379	tags=59%, list=18%, signal=48%	ICAM2/SIRPA/FSCN1/PECAM1/ZYX/MSN/CLDN5/RAC2/TRAF1/CD209/CX3CL1/COL16A1/MYL9/EPB41L2/CNN2/GNAI2/CD86/VCAM1/PTPRC/CADM3/ACTB/FYB1/ICAM1/VWF/CD34/BMP1/NEXN/EGFR/MMP2/ARPC2/LAYN/NRXN2/RRAS/ADAM23/TSPAN4/THY1/CLDN11/AKT3/FLNC/CLDN15/GNAI1/MAPK11/VASP/ACTG2/ADAMTS5/CALB2/NECTIN3/SDC3/MMP9/ACTN1/PFN1/RSU1/CD99/LAMB3/DSC3/CDH3/TGFBI/SYK/MYH9/CLDN14/CD274/SLIT2/SORBS3/ICAM5/ITGA9/THBS3/COL17A1/RHOF/SGCE/S…
HALLMARK_HYPOXIA	199	0.593652766385128	2.11052170105765	1e-10	2.94117647058824e-10	5.57275541795666e-11	9110	tags=49%, list=16%, signal=41%	CHST2/ETS1/S100A4/CAVIN1/CAV1/PIM1/SRPX/CAVIN3/PYGM/IL6/TNFAIP3/PLAC8/PGF/PRKCA/SLC2A3/CCN1/PPP1R15A/CHST3/BGN/EGFR/CSRP2/PNRC1/CXCR4/CCN2/SLC2A5/HMOX1/TKTL1/ZFP36/HAS1/TGM2/PLAUR/IGFBP3/DCN/PLIN2/ATF3/SDC3/ANGPTL4/PKP1/PHKG1/LXN/NFIL3/HS3ST1/CCN5/TGFBI/MYH9/DUSP1/FOS/JUN/KLF6/SERPINE1/AKAP12/CDKN1C/ISG20/ADM/NAGK/PCK1/BTG1/LOX/PPARGC1A/MAFF/ENO1/DPYSL4/COL5A1/HEXA/MT2A/XPNPEP1/MT1E/F3/TES/PAM/PG…
HALLMARK_MYC_TARGETS_V1	199	-0.452276	-2.03306	1.50239002284196e-10	4.17330561900545e-10	7.90731590969454e-11	10662	tags=42%, list=19%, signal=34%	NME1/CLNS1A/MRPS18B/AIMP2/PSMA2/YWHAE/STARD7/TCP1/IMPDH2/NOP56/CCT3/LDHA/SRPK1/PGK1/PSMD14/KPNA2/RAN/HNRNPR/UBA2/VDAC3/MCM2/SNRPD3/HNRNPA2B1/MCM4/PCNA/NPM1/HPRT1/NDUFAB1/SET/RSL1D1/NCBP2/DDX21/UBE2E1/PSMA6/GNL3/COPS5/NOLC1/ABCE1/MAD2L1/CDK2/CCT5/G3BP1/ACP1/PSMD1/PWP1/HNRNPC/EPRS1/PSMD3/EIF2S1/EIF4G2/VBP1/EIF1AX/HSPD1/XPOT/EIF3J/VDAC1/NCBP1/SMARCC1/HSP90AB1/KPNB1/ETF1/HNRNPU/ORC2/CBX3/IARS1/GLO1/P…
HALLMARK_APOPTOSIS	161	0.580026926588034	2.02884217171282	2.55099679600352e-10	6.71314946316716e-10	1.2719651614422e-10	5118	tags=40%, list=9%, signal=37%	GSN/ANXA1/PRF1/BMP2/CCND2/CD14/CD2/CAV1/FAS/PLCB2/GPX3/IL6/CD69/CASP1/IGFBP6/BGN/CASP4/FASLG/CD38/MMP2/IL18/BIRC3/IRF1/FEZ1/HMOX1/SOD2/TIMP1/ANKH/LMNA/DCN/ATF3/GPX1/CCNA1/DPYD/IFNGR1/TIMP2/GADD45B/EMP1/PEA15/TSPO/IL1B/SAT1/GNA15/PDGFRB/LGALS3/PLPPR4/JUN/BAX/CFLAR/ISG20/TNF/NEFH/HGF/TNFRSF12A/GADD45A/AVPR1A/SATB1/F2R/LUM/NEDD9/BTG3/TXNIP/TAP1/BID/IFITM3
HALLMARK_PROTEIN_SECRETION	96	-0.564196	-2.37975	5.2886791099545e-10	1.32216977748863e-09	2.50516378892582e-10	8004	tags=55%, list=14%, signal=48%	GOSR2/SEC24D/VAMP7/KIF1B/ADAM10/MAPK1/SEC22B/STX16/GALC/DOP1A/SNAP23/SOD1/VPS45/STAM/VPS4B/RAB2A/GBF1/NAPA/TMED10/BNIP3/RAB5A/VAMP4/DNM1L/LMAN1/ATP6V1H/TMX1/USO1/RAB14/KRT18/ICA1/COPB2/AP3B1/AP1G1/RAB22A/ATP7A/NAPG/COPB1/MON2/ARFIP1/CLTC/AP2B1/ARFGEF2/TSG101/OCRL/GOLGA4/COG2/TMED2/ARFGEF1/TPD52/CLCN3/SCAMP1/TOM1L1/YIPF6
HALLMARK_P53_PATHWAY	199	0.533134404391997	1.89537014524715	3.77788827241458e-09	8.99497207717757e-09	1.70431049883365e-09	9129	tags=46%, list=16%, signal=39%	S100A4/BMP2/CCND2/IRAG2/FAS/SPHK1/SOCS1/UPP1/TCN2/RRAD/PLK3/TGFB1/CASP1/PPP1R15A/EPHA2/ADA/RAP2B/NOTCH1/KRT17/HBEGF/HMOX1/DEF6/CD82/LDHB/LIF/PROCR/ATF3/CD81/TNFSF9/DGKA/RNF19B/RGS16/IFI30/CCND3/PTPRE/SAT1/FOS/KLK8/JUN/BAX/SERPINB5/S100A10/CEBPA/DRAM1/GADD45A/PTPN14/RPS12/PDGFA/F2R/BTG1/GM2A/CDKN2A/ZFP36L1/CTSD/TXNIP/BAK1/PHLDA3/TAP1/KLF4/RPL36/RALGDS/RPL18/JAG2/ISCU/TP63/DDIT4/IER5/CDKN2B/RHBDF2/…
HALLMARK_KRAS_SIGNALING_DN	200	0.523869906907606	1.86523808372021	1.08781430807215e-08	2.47230524561852e-08	4.68436783380351e-09	10120	tags=45%, list=18%, signal=37%	CHST2/CD40LG/KCNMB1/SYNPO/PDCD1/PTGFR/SGK1/TCL1A/TCF7L1/SLC16A7/SHOX2/KCND1/KRT5/SLC12A3/IL12B/CLDN16/IFNG/OXT/EDN1/ITIH3/SOX10/NUDT11/CCNA1/PKP1/COPZ2/CPA2/RYR1/WNT16/TGM1/GPR3/EDAR/NRIP2/CYP39A1/KLK8/KCNN1/CD207/KLK7/GP1BA/SLC6A14/SLC30A3/MYH7/MEFV/DCC/CLSTN3/CD80/NTF3/CCR8/SMPX/CALML5/ACTC1/KRT1/ITGB1BP2/CNTFR/EDN2/VPREB1/SNCB/DLK2/TGFB2/ATP4A/KRT4/KRT15/CKM/ABCG4/NOS1/PAX3/CAMK1D/MACROH2A2/FG…
HALLMARK_ESTROGEN_RESPONSE_LATE	200	-0.394699	-1.76793	2.3914552848089e-07	5.19881583654108e-07	9.85038790081468e-08	6676	tags=40%, list=12%, signal=35%	GINS2/KRT19/CHST8/PDZK1/SEMA3B/HSPB8/HPRT1/DNAJC1/SCUBE2/DHRS2/LARGE1/PGR/HSPA4L/PLK4/PRKAR2B/TFF3/ITPK1/SULT2B1/ST6GALNAC2/UGDH/ACOX2/BCL2/SERPINA5/FAM102A/RBBP8/FGFR3/IL17RB/CDC6/LLGL2/PLAC1/METTL3/UNC13B/MOCS2/FRK/ALDH3A2/RAPGEFL1/ELOVL5/SIAH2/SLC1A4/TOP2A/IL6ST/AFF1/AMFR/TJP3/ABHD2/EMP2/TPBG/RET/SCNN1A/AGR2/SLC27A2/WFS1/MAPT/HOMER2/ARL3/CELSR2/COX6C/DYNLT3/ABCA3/DNAJC12/OVOL2/DLG5/MAPK13/CDH1…
HALLMARK_OXIDATIVE_PHOSPHORYLATION	200	-0.368679	-1.65138	4.82429600500734e-06	1.00506166770986e-05	1.90432737039764e-06	8047	tags=30%, list=14%, signal=26%	VDAC2/DLAT/NDUFA7/RETSAT/ATP5MC2/VDAC3/COX6A1/ACO2/NDUFS4/NDUFV2/GRPEL1/AFG3L2/NDUFAB1/HADHB/DLD/ISCA1/ATP6V1G1/COX17/IMMT/SDHC/UQCRC2/NNT/AIFM1/ABCB7/MTRR/CYB5A/TIMM17A/IDH3A/CPT1A/PDHB/ATP6V1D/NDUFC2/ATP5F1B/SUCLA2/ATP6V1H/MTX2/COX15/SLC25A4/VDAC1/OPA1/ETFDH/NDUFA5/ATP6AP1/COX11/COX6C/GLUD1/CS/ATP6V1C1/PRDX3/MRPS30/GOT2/ALDH6A1/ACADSB/RHOT1/PDHX/NDUFS1/LRPPRC/MRPL35/TOMM70/HSPA9
HALLMARK_ANGIOGENESIS	36	0.699619744137654	2.02878284530906	5.89597903955483e-06	1.17919580791097e-05	2.23426574130499e-06	7481	tags=64%, list=13%, signal=56%	S100A4/CCND2/LPL/FSTL1/KCNJ8/TIMP1/NRP1/CXCL6/SLCO2A1/MSX1/THBD/PDGFA/TNFRSF21/LUM/COL3A1/JAG2/PF4/OLR1/PRG2/COL5A2/APP/VCAN/JAG1
HALLMARK_MTORC1_SIGNALING	200	-0.353368	-1.5828	2.19707855833264e-05	4.22515107371661e-05	8.00554940283147e-06	8420	tags=38%, list=15%, signal=32%	GSR/STIP1/EEF1E1/PGK1/CCNG1/IDI1/PSMD14/MTHFD2/GTF2H1/MCM2/UFM1/MCM4/SSR1/GOT1/HPRT1/CCT6A/MTHFD2L/CACYBP/SERP1/UBE2D3/PNO1/COPS5/TM7SF2/UCHL5/TXNRD1/EDEM1/IMMT/CCNF/RDH11/GMPS/NUP205/SQLE/EPRS1/INSIG1/UNG/TCEA1/HMGCS1/ATP6V1D/TUBG1/GCLC/CYP51A1/P4HA1/TRIB3/ELOVL5/ALDOA/STC1/SLC1A4/HSPD1/USO1/ADIPOR2/SCD/DHCR24/BHLHE40/ELOVL6/HK2/ETF1/PSME3/TBK1/ACSL3/PSMD12/SYTL2/DHFR/TMEM97/PSMC6/ACLY/ATP2A2/CA…
HALLMARK_XENOBIOTIC_METABOLISM	199	0.467576013030582	1.66230055391481	2.54529230292146e-05	4.71350426466937e-05	8.93085018568934e-06	6074	tags=32%, list=11%, signal=28%	ATOH8/ABCD2/HSD11B1/PTGDS/FAS/IRF8/PROS1/UPP1/VNN1/IGF1/F10/APOE/TMEM176B/PSMB10/ETS2/FMO1/RBP4/CDO1/EPHA2/LCAT/FBLN1/SLC12A4/TNFRSF1A/HMOX1/GSTO1/TPST1/GCKR/ALDH2/ITIH1/FMO3/CYP27A1/CYP2S1/AOX1/CD36/CES1/GABARAPL1/BCAT1/HSD17B2/CCL25/SERPINE1/CDA/ADH1C/AKR1C2/IL1R1/AKR1C3/NDRG2/ALDH3A1/SMOX/MT2A/PPARD/SERTAD1/UPB1/SLC6A12/CBR1/PDK4/AQP9/SLC22A1/CRP/PEMT/AP4B1/KYNU/KARS1/TGFB2
HALLMARK_UNFOLDED_PROTEIN_RESPONSE	112	-0.428498	-1.83949	2.99033627290341e-05	5.33988620161324e-05	1.01176791188461e-05	8025	tags=38%, list=14%, signal=33%	STC2/GOSR2/MTHFD2/DNAJC3/SSR1/ALDH18A1/NPM1/EIF4A2/DCP1A/SERP1/BAG3/NFYA/NOLC1/EIF4A3/EXOSC2/EDEM1/DCTN1/ERN1/YWHAZ/SDAD1/NOP14/EIF2S1/DCP2/SPCS1/CNOT4/SLC1A4/XPOT/EIF2AK3/WFS1/ATF6/PARN/IARS1/EXOC2/CNOT2/MTREX/DNAJA4/CNOT6/EIF4E/PAIP1/KIF5B/SLC30A5/XBP1/HSPA9
HALLMARK_MITOTIC_SPINDLE	199	-0.339997	-1.52835	0.000143777152828131	0.000247891642807123	4.69689428476653e-05	7888	tags=37%, list=14%, signal=32%	CEP72/FARP1/TBCD/ROCK1/KIF1B/CENPF/KIF23/CEP192/KIF15/CSNK1D/EZR/KIF22/TAOK2/CDK1/TRIO/FGD6/PCM1/ARHGEF11/KIF11/BRCA2/ESPL1/NET1/TUBD1/NEK2/MAPRE1/ARF6/SMC4/DYNC1H1/PREX1/EPB41/OPHN1/RAPGEF6/NUMA1/SMC1A/KIF20B/SMC3/DLG1/CENPE/SASS6/BCL2L11/TLK1/RASA1/CDC27/TSC1/ARHGEF12/TOP2A/TUBGCP5/RICTOR/ARFIP2/LATS1/CLIP1/ARHGAP5/ECT2/RACGAP1/ALMS1/DYNLL2/RABGAP1/KNTC1/RANBP9/PPP4R2/RFC1/STAU1/ALS2/CKAP5/APC/…
HALLMARK_WNT_BETA_CATENIN_SIGNALING	42	0.638616589600905	1.89346468066559	0.000176520445658417	0.000294200742764029	5.57432986289739e-05	7907	tags=45%, list=14%, signal=39%	CCND2/TCF7/WNT1/WNT6/WNT5B/NOTCH1/GNAI1/NOTCH4/FZD8/DLL1/PPARD/PTCH1/JAG2/DKK1/FZD1/HEY2/LEF1/JAG1/HEY1
HALLMARK_UV_RESPONSE_UP	158	0.461525534391494	1.61592649872772	0.000236201341469859	0.000380969905596546	7.2183771586714e-05	6362	tags=31%, list=11%, signal=28%	BMP2/MGAT1/LYN/GPX3/IL6/RRAD/HLA-F/CXCL2/ICAM1/ARRB2/FMO1/CDO1/SHOX2/ABCB1/IRF1/HMOX1/JUNB/SOD2/ATF3/RAB27A/CLTB/HYAL2/GAL/FGF18/MMP14/HTR7/CCND3/NTRK3/FOS/UROD/MSX1/CDKN1C/FOSB/NFKBIA/BTG1/BTG3/BAK1/PDLIM3/TAP1/NR4A1/BID/SLC6A12/KLHDC3/GLS/TUBA4A/CDKN2B/TYRO3/STK25/NKX2-5
HALLMARK_UV_RESPONSE_DN	144	0.469087483491419	1.63301170945116	0.00027881536801282	0.000435649012520031	8.25440234248479e-05	7697	tags=38%, list=14%, signal=33%	PIK3CD/FYN/FBLN5/CELF2/CAV1/PTGFR/ID1/TGFBR2/TFPI/PRKCA/CCN1/GRK5/PLPP3/DAB2/PPARG/SNAI2/AKT3/HAS2/RND3/NRP1/KIT/SCHIP1/PTPRM/ADGRL2/CACNA1A/MET/NFIB/SYNE1/DUSP1/PDGFRB/SERPINE1/ADD3/DLC1/EFEMP1/COL1A1/ITGB3/COL3A1/MT1E/F3/LAMC1/MAP1B/COL1A2/ACVR2A/NR3C1/PEX14/PTPN21/SDC2/ANXA2/COL5A2/ANXA4/TGFBR3/PMP22/SMAD7/VLDLR
HALLMARK_DNA_REPAIR	149	-0.35466	-1.551	0.000298289550511672	0.000451953864411624	8.56333637832552e-05	7167	tags=30%, list=13%, signal=26%	VPS37D/RAD52/PCNA/BRF2/NFX1/HPRT1/RNMT/NCBP2/AAAS/RPA3/POLB/XPC/ERCC3/NELFCD/POLR2D/UMPS/COX17/ZWINT/POM121/GMPR2/TAF9/POLR2A/CETN2/POLR2K/NUDT9/MPC2/DDB1/ERCC8/STX3/RAE1/CSTF3/RFC5/GTF2H3/SRSF6/POLA1/ARL6IP1/RRM2B/ADCY6/SMAD5/PRIM1/ERCC4/TSG101/TMED2/CANT1/DCTN4
HALLMARK_HEDGEHOG_SIGNALING	36	0.599336147429678	1.7379768147877	0.00188647557053613	0.00277422878020019	0.000525643347827404	7907	tags=56%, list=14%, signal=48%	DPYSL2/PML/ETS2/NRP2/THY1/GLI1/ACHE/NRP1/CDK6/MYH9/SCG2/L1CAM/PTCH1/CNTFR/CRMP1/RTN1/HEY2/NKX6-1/VLDLR/HEY1
HALLMARK_REACTIVE_OXYGEN_SPECIES_PATHWAY	49	0.560735150524665	1.71052604604969	0.00227096188003407	0.00324423125719153	0.000614696448731027	6568	tags=35%, list=12%, signal=31%	LSP1/FES/GPX3/FTL/IPCEF1/MSRA/PRNP/JUNB/SOD2/MPO/HHEX/MBP/SBNO2/STK25/PFKP/PDLIM1/GLRX
HALLMARK_TGF_BETA_SIGNALING	54	0.523411569556231	1.61845492616977	0.00574414317414182	0.00797797663075253	0.00151161662477416	4151	tags=30%, list=7%, signal=27%	ENG/BMP2/ID3/ID1/TGFB1/PPP1R15A/LEFTY2/SKI/JUNB/WWTR1/LTBP2/SERPINE1/CDKN1C/FKBP1A/IFNGR2/NOG
HALLMARK_NOTCH_SIGNALING	32	0.583044296921008	1.65261225049488	0.00818895143684179	0.0110661505903267	0.0020967443223777	8576	tags=50%, list=15%, signal=42%	PRKCA/MAML2/ST3GAL6/NOTCH1/DTX1/WNT2/FZD7/DTX4/TCF7L2/DLL1/PPARD/DTX2/FZD1/HEYL/JAG1/NOTCH3
HALLMARK_APICAL_SURFACE	44	0.521374082724681	1.55866960735487	0.0138741226502731	0.0180635811497674	0.00342257327048224	7858	tags=48%, list=14%, signal=41%	IL2RG/MAL/LYN/SRPX/CX3CL1/GAS1/IL2RB/THY1/PLAUR/GHRL/RHCG/SLC2A4/EFNA5/PCSK9/CROCC/AKAP7/DCBLD2/APP/SLC22A12/PKHD1/NTNG1
HALLMARK_PEROXISOME	104	-0.320166	-1.36512	0.0140895932968185	0.0180635811497674	0.00342257327048224	7907	tags=36%, list=14%, signal=31%	IDI1/RETSAT/GNPAT/ABCB9/PEX11B/HSD11B2/CRABP2/SERPINA6/SOD1/ALDH9A1/ERCC3/MSH2/SULT2B1/RDH11/ECI2/VPS4B/SEMA3C/DIO1/ISOC1/ACOX1/HSD17B4/ELOVL5/TOP2A/ABCC5/PEX11A/SLC25A4/PEX13/ABCC8/SMARCC1/DHCR24/SLC27A2/CDK7/SLC25A17/PEX2/IDE/ABCD3/LONP2
HALLMARK_CHOLESTEROL_HOMEOSTASIS	74	0.436763430001626	1.4243261423769	0.0300120048019208	0.037515006002401	0.00710810640045492	7501	tags=34%, list=13%, signal=29%	FABP5/LPL/ANTXR2/PPARG/PNRC1/LGMN/CXCL16/ANXA13/GNAI1/PLAUR/ADH4/ATF3/ANXA5/NFIL3/STARD4/LGALS3/TNFRSF12A/AVPR1A/S100A11/MVD/ATF5/FBXO6/PLSCR1/JAG1/GPX8
HALLMARK_PANCREAS_BETA_CELLS	40	0.490840668180768	1.44406240065423	0.0325945241199478	0.039749419658473	0.0075314689879212	10009	tags=40%, list=18%, signal=33%	LMO2/FOXO1/PAK3/MAFB/DPP4/AKT3/PCSK1/DCX/GCK/NKX6-1/CHGA/VDR/PDX1/PAX6/ISL1/NEUROG3
