# Supplementary material for: Integrated bulk RNA and single-cell RNA sequencing to identify and validate exercise-related genes for predicting the prognosis of invasive ductal carcinoma
Source: Research Square preprint supplement (doi:10.21203/rs.3.rs-8444169/v1), 2026-01-16
Supplement: Supplementary file 14 [file bdac1fabb78123a717e097c5.xlsx]

## Sheet: Sheet1
Univariate Cox regression analysis and PH hypothesis test
	chisq	df	p
risk score	0.127	1	0.72
tumor stage	5.93	3	0.12
age	1.95	1	0.16
