# Supplementary material for: Integrated bulk RNA and single-cell RNA sequencing to identify and validate exercise-related genes for predicting the prognosis of invasive ductal carcinoma
Source: Research Square preprint supplement (doi:10.21203/rs.3.rs-8444169/v1), 2026-01-16
Supplement: Supplementary file 15 [file beb3c7d4eb9bc4ae734dbb93.xlsx]

## Sheet: Supplementary Table 2
Table of Differential Gene Information.
	x
1	PYGM
2	TPM3
3	FAM13A
4	COMP
5	PNPLA2
6	SCN4B
7	EGR1
8	PCK1
9	CAVIN1
10	CCDC78
11	ANK2
12	DMD
13	TK2
14	ABCC9
15	VGF
16	GYPC
17	DNA2
18	EGR2
19	FLAD1
20	SCN2B
21	PARN
22	KCNE1
23	PHKG2
24	NTRK2
25	SCN3B
26	FARSA
27	KCNJ3
28	HADHA
29	SCN5A
30	PGM1
31	MAGED1
32	TRDN
33	CAV3
34	DUSP6
35	PGK1
36	CSF3
37	ISCU
38	TERT
39	GATA4
40	PHKA2
41	COL12A1
42	ELK1
43	GATA5
44	GRB2
45	GMPPB
46	DPP9
47	NUP155
48	SYN1
49	GPR37L1
50	NPTX2
51	AMPD1
52	SPTA1
53	MT-TF
54	MUC5B
55	GAD1
56	SPTB
57	SCG2
58	SLC25A20
59	PUS1
60	KCNH2
61	ALDOA
62	SNTA1
63	SLC2A9
64	SVIL
65	CALM2
66	TLL1
67	KCNJ2
68	PYGL
69	KCNA5
70	MT-ND1
71	KBTBD13
72	PHKA1
73	OBSCN
74	ABCA3
75	TTN
76	MT-ND5
77	CITED2
78	DPM3
79	LDHA
80	GAA
81	BVES
82	MT-ND6
83	MT-CYB
84	TPM2
85	ATP5F1E
86	C1QBP
87	CACNA1C
88	ALDH4A1
89	COL9A3
90	COQ8A
91	COL13A1
92	NPPA
93	NKX2-5
94	COA3
95	GIT1
96	ACTA1
97	MT-ATP8
98	TBX5
99	MYH6
100	MT-ND4
101	MLIP
102	RRM2B
103	TBX20
104	SLC6A1
105	DSP
106	MFGE8
107	ACTC1
108	MT-ATP6
109	COL9A1
110	ENO3
111	IL16
112	EGR4
113	GABRR1
114	RYR1
115	COL9A2
116	SCN10A
117	PIEZO2
118	SFTPA2
119	NRTN
120	MYPN
