# Supplementary material for: Integrated bulk RNA and single-cell RNA sequencing to identify and validate exercise-related genes for predicting the prognosis of invasive ductal carcinoma
Source: Research Square preprint supplement (doi:10.21203/rs.3.rs-8444169/v1), 2026-01-16
Supplement: Supplementary file 17 [file e6085aaf00bbbd2a279fd998.xlsx]

## Sheet: Supplementary Table 10
Cells related to proline catabolism and MGMT-mediated DNA damage reversal processes.
	name	min	max	diff
R-HSA-1299316	TWIK-releated acid-sensitive K+ channel (TASK)	-0.998845	0.971782	1.97063
R-HSA-5657655	MGMT-mediated DNA damage reversal	-0.964356	0.910561	1.87492
R-HSA-112122	ALKBH2 mediated reversal of alkylation damage	-0.880157	0.863703	1.74386
R-HSA-211994	Sterols are 12-hydroxylated by CYP8B1	-0.802999	0.884478	1.68748
R-HSA-2142696	Synthesis of Hepoxilins (HX) and Trioxilins (TrX)	-0.738592	0.912699	1.65129
R-HSA-70688	Proline catabolism	-0.698965	0.778997	1.47796
R-HSA-162699	Synthesis of dolichyl-phosphate mannose	-0.775338	0.666969	1.44231
R-HSA-166020	Transfer of LPS from LBP carrier to CD14	-0.802788	0.632526	1.43531
R-HSA-428559	Proton-coupled neutral amino acid transporters	-0.789265	0.63526	1.42453
R-HSA-75064	mRNA Editing: A to I Conversion	-0.685709	0.713947	1.39966
R-HSA-75102	C6 deamination of adenosine	-0.685709	0.713947	1.39966
R-HSA-77042	Formation of editosomes by ADAR proteins	-0.685709	0.713947	1.39966
R-HSA-975574	Reactions specific to the hybrid N-glycan synthesis pathway	-0.747855	0.646865	1.39472
R-HSA-9025106	Biosynthesis of DPAn-6 SPMs	-0.669724	0.715424	1.38515
R-HSA-392023	Adrenaline signalling through Alpha-2 adrenergic receptor	-0.713531	0.669142	1.38267
R-HSA-5653890	Lactose synthesis	-0.506197	0.865644	1.37184
R-HSA-5263617	Metabolism of ingested MeSeO2H into MeSeH	-0.754518	0.613702	1.36822
R-HSA-2395516	Electron transport from NADPH to Ferredoxin	-0.610105	0.741429	1.35153
R-HSA-2855086	Ficolins bind to repetitive carbohydrate structures on the target cell surface	-0.607923	0.71787	1.32579
R-HSA-1483196	PI and PC transport between ER and Golgi membranes	-0.660781	0.662183	1.32296
R-HSA-71737	Pyrophosphate hydrolysis	-0.759676	0.557064	1.31674
R-HSA-9024909	BDNF activates NTRK2 (TRKB) signaling	-0.397755	0.88975	1.28751
R-HSA-389542	NADPH regeneration	-0.633196	0.646958	1.28015
R-HSA-428359	Insulin-like Growth Factor-2 mRNA Binding Proteins (IGF2BPs/IMPs/VICKZs) bind RNA	-0.681562	0.542457	1.22402
R-HSA-1299308	Tandem of pore domain in a weak inwardly rectifying K+ channels (TWIK)	-0.42251	0.798578	1.22109
R-HSA-173623	Classical antibody-mediated complement activation	-0.574737	0.610535	1.18527
R-HSA-888593	Reuptake of GABA	-0.38984	0.778598	1.16844
R-HSA-8941413	Events associated with phagocytolytic activity of PMN cells	-0.306186	0.852298	1.15848
R-HSA-1483152	Hydrolysis of LPE	-0.764015	0.38584	1.14986
R-HSA-8849175	Threonine catabolism	-0.564466	0.577934	1.1424
R-HSA-1483101	Synthesis of PS	-0.623184	0.513032	1.13622
R-HSA-5652227	Fructose biosynthesis	-0.510238	0.616744	1.12698
R-HSA-8981607	Intracellular oxygen transport	-0.380147	0.743213	1.12336
R-HSA-5627083	RHO GTPases regulate CFTR trafficking	-0.600791	0.476645	1.07744
R-HSA-8941237	Invadopodia formation	-0.505493	0.57088	1.07637
R-HSA-430039	mRNA decay by 5' to 3' exoribonuclease	-0.613414	0.45566	1.06907
R-HSA-2142770	Synthesis of 15-eicosatetraenoic acid derivatives	-0.57749	0.488357	1.06585
R-HSA-5626978	TNFR1-mediated ceramide production	-0.541033	0.521953	1.06299
R-HSA-9619483	Activation of AMPK downstream of NMDARs	-0.565551	0.479101	1.04465
R-HSA-1296346	Tandem pore domain potassium channels	-0.283542	0.751733	1.03527
R-HSA-3000497	Scavenging by Class H Receptors	-0.556521	0.469067	1.02559
R-HSA-6785470	tRNA processing in the mitochondrion	-0.50072	0.512225	1.01295
R-HSA-111452	Activation and oligomerization of BAK protein	-0.632262	0.370146	1.00241
R-HSA-500753	Pyrimidine biosynthesis	-0.461635	0.533732	0.995367
R-HSA-209905	Catecholamine biosynthesis	-0.462019	0.521245	0.983265
R-HSA-9820865	Z-decay: degradation of maternal mRNAs by zygotically expressed factors	-0.564879	0.416507	0.981386
R-HSA-211957	Aromatic amines can be N-hydroxylated or N-dealkylated by CYP1A2	-0.252268	0.720251	0.972519
R-HSA-211999	CYP2E1 reactions	-0.417673	0.553713	0.971386
R-HSA-1368071	NR1D1 (REV-ERBA) represses gene expression	-0.506906	0.462282	0.969187
R-HSA-163754	Insulin effects increased synthesis of Xylulose-5-Phosphate	-0.510674	0.458406	0.969081
R-HSA-9636003	NEIL3-mediated resolution of ICLs	-0.217029	0.750954	0.967982
R-HSA-163282	Mitochondrial transcription initiation	-0.443685	0.523463	0.967148
R-HSA-432030	Transport of glycerol from adipocytes to the liver by Aquaporins	-0.360811	0.606287	0.967097
R-HSA-9025046	NTF3 activates NTRK2 (TRKB) signaling	-0.200556	0.762296	0.962852
R-HSA-9017802	Noncanonical activation of NOTCH3	-0.573345	0.386022	0.959367
R-HSA-1236973	Cross-presentation of particulate exogenous antigens (phagosomes)	-0.521107	0.434702	0.955809
R-HSA-198765	Signalling to ERK5	-0.546749	0.406305	0.953054
R-HSA-8866906	TFAP2 (AP-2) family regulates transcription of other transcription factors	-0.377232	0.560089	0.937321
R-HSA-9026395	Biosynthesis of DHA-derived sulfido conjugates	-0.578964	0.354491	0.933455
R-HSA-9026762	Biosynthesis of maresin conjugates in tissue regeneration (MCTR)	-0.578964	0.354491	0.933455
R-HSA-977347	Serine biosynthesis	-0.41867	0.513884	0.932553
R-HSA-112303	Electric Transmission Across Gap Junctions	-0.464518	0.467093	0.931611
R-HSA-112307	Transmission across Electrical Synapses	-0.464518	0.467093	0.931611
R-HSA-380095	Tachykinin receptors bind tachykinins	-0.455465	0.473718	0.929183
R-HSA-187042	TRKA activation by NGF	-0.343423	0.583529	0.926952
R-HSA-196783	Coenzyme A biosynthesis	-0.422819	0.501729	0.924548
R-HSA-9759811	Regulation of CDH11 mRNA translation by microRNAs	-0.578814	0.332671	0.911486
R-HSA-8963676	Intestinal absorption	-0.35582	0.55496	0.91078
R-HSA-8981373	Intestinal hexose absorption	-0.35582	0.55496	0.91078
R-HSA-975956	Nonsense Mediated Decay (NMD) independent of the Exon Junction Complex (EJC)	-0.538135	0.372445	0.91058
R-HSA-8939256	RUNX1 regulates transcription of genes involved in WNT signaling	-0.503313	0.405473	0.908786
R-HSA-8948700	Competing endogenous RNAs (ceRNAs) regulate PTEN translation	-0.590746	0.313073	0.903818
R-HSA-193993	Mineralocorticoid biosynthesis	-0.176074	0.727523	0.903597
R-HSA-9854909	Regulation of MITF-M dependent genes involved in invasion	-0.420502	0.48132	0.901822
R-HSA-8931987	RUNX1 regulates estrogen receptor mediated transcription	-0.49979	0.400255	0.900044
R-HSA-72764	Eukaryotic Translation Termination	-0.525863	0.372136	0.897999
R-HSA-9839406	TGFBR3 regulates activin signaling	-0.476827	0.42085	0.897677
R-HSA-1799339	SRP-dependent cotranslational protein targeting to membrane	-0.528135	0.366843	0.894978
R-HSA-9768778	Regulation of NPAS4 mRNA translation	-0.56517	0.329636	0.894806
R-HSA-156827	L13a-mediated translational silencing of Ceruloplasmin expression	-0.530023	0.363491	0.893514
R-HSA-72689	Formation of a pool of free 40S subunits	-0.53223	0.359487	0.891717
R-HSA-156902	Peptide chain elongation	-0.518073	0.371681	0.889755
R-HSA-167826	The fatty acid cycling model	-0.197959	0.691396	0.889356
R-HSA-72706	GTP hydrolysis and joining of the 60S ribosomal subunit	-0.52787	0.360847	0.888717
R-HSA-2408557	Selenocysteine synthesis	-0.525824	0.362802	0.888626
R-HSA-9839383	TGFBR3 PTM regulation	-0.51686	0.369756	0.886617
R-HSA-9014843	Interleukin-33 signaling	-0.17308	0.713166	0.886246
R-HSA-9864848	Complex IV assembly	-0.458861	0.42341	0.882271
R-HSA-166786	Creation of C4 and C2 activators	-0.399105	0.482954	0.882059
R-HSA-156842	Eukaryotic Translation Elongation	-0.513176	0.368861	0.882037
R-HSA-426496	Post-transcriptional silencing by small RNAs	-0.576993	0.30465	0.881643
R-HSA-2161541	Abacavir metabolism	-0.396365	0.482154	0.878519
R-HSA-1306955	GRB7 events in ERBB2 signaling	-0.460109	0.416167	0.876276
R-HSA-427601	Multifunctional anion exchangers	-0.254833	0.614278	0.86911
R-HSA-75944	Transcription from mitochondrial promoters	-0.413628	0.45448	0.868108
R-HSA-433692	Proton-coupled monocarboxylate transport	-0.457988	0.409113	0.867101
R-HSA-194313	VEGF ligand-receptor interactions	-0.407193	0.455916	0.863109
R-HSA-195399	VEGF binds to VEGFR leading to receptor dimerization	-0.407193	0.455916	0.863109
R-HSA-114294	Activation, translocation and oligomerization of BAX	-0.539742	0.323088	0.86283
R-HSA-429947	Deadenylation of mRNA	-0.526761	0.332726	0.859487
R-HSA-72613	Eukaryotic Translation Initiation	-0.521333	0.338051	0.859384
R-HSA-72737	Cap-dependent Translation Initiation	-0.521333	0.338051	0.859384
R-HSA-9820841	M-decay: degradation of maternal mRNAs by maternally stored factors	-0.512487	0.344887	0.857374
R-HSA-418359	Reduction of cytosolic Ca++ levels	-0.444956	0.408743	0.853699
R-HSA-72649	Translation initiation complex formation	-0.512997	0.339297	0.852293
R-HSA-173599	Formation of the active cofactor, UDP-glucuronate	-0.581374	0.266166	0.847539
R-HSA-72695	Formation of the ternary complex, and subsequently, the 43S complex	-0.51799	0.327941	0.845931
R-HSA-72702	Ribosomal scanning and start codon recognition	-0.510229	0.335307	0.845536
R-HSA-72662	Activation of the mRNA upon binding of the cap-binding complex and eIFs, and subsequent binding to 43S	-0.513589	0.331082	0.844671
R-HSA-165181	Inhibition of TSC complex formation by PKB	-0.464924	0.378174	0.843098
R-HSA-141333	Biogenic amines are oxidatively deaminated to aldehydes by MAOA and MAOB	-0.295951	0.543621	0.839572
R-HSA-8853383	Lysosomal oligosaccharide catabolism	-0.457457	0.372303	0.829761
R-HSA-927802	Nonsense-Mediated Decay (NMD)	-0.492782	0.32388	0.816662
R-HSA-975957	Nonsense Mediated Decay (NMD) enhanced by the Exon Junction Complex (EJC)	-0.492782	0.32388	0.816662
R-HSA-5419276	Mitochondrial translation termination	-0.481803	0.328425	0.810228
R-HSA-8964046	VLDL clearance	-0.459426	0.349446	0.808872
R-HSA-187706	Signalling to p38 via RIT and RIN	-0.475197	0.331644	0.806841
R-HSA-140342	Apoptosis induced DNA fragmentation	-0.509825	0.28995	0.799775
R-HSA-75072	mRNA Editing	-0.370554	0.42613	0.796685
R-HSA-8949215	Mitochondrial calcium ion transport	-0.47934	0.315323	0.794664
R-HSA-5221030	TET1,2,3 and TDG demethylate DNA	-0.558197	0.235434	0.793631
R-HSA-2408522	Selenoamino acid metabolism	-0.461812	0.330013	0.791825
R-HSA-72731	Recycling of eIF2:GDP	-0.40384	0.386593	0.790432
R-HSA-110381	Resolution of AP sites via the single-nucleotide replacement pathway	-0.438697	0.351313	0.79001
R-HSA-383280	Nuclear Receptor transcription pathway	-0.469396	0.320595	0.78999
R-HSA-73930	Abasic sugar-phosphate removal via the single-nucleotide replacement pathway	-0.430295	0.358659	0.788954
R-HSA-9629569	Protein hydroxylation	-0.47868	0.308202	0.786883
R-HSA-163210	Formation of ATP by chemiosmotic coupling	-0.361424	0.423433	0.784857
R-HSA-111367	SLBP independent Processing of Histone Pre-mRNAs	-0.536679	0.246893	0.783572
R-HSA-9821993	Replacement of protamines by nucleosomes in the male pronucleus	-0.386553	0.394279	0.780832
R-HSA-166662	Lectin pathway of complement activation	-0.305587	0.47368	0.779267
R-HSA-9730628	Sensory perception of salty taste	-0.169371	0.608006	0.777377
R-HSA-8964208	Phenylalanine metabolism	-0.466444	0.306974	0.773418
R-HSA-419771	Opsins	-0.475972	0.2969	0.772872
R-HSA-72187	mRNA 3'-end processing	-0.517597	0.253681	0.771278
R-HSA-5389840	Mitochondrial translation elongation	-0.444254	0.324335	0.768589
R-HSA-163316	Mitochondrial transcription termination	-0.538505	0.226788	0.765293
R-HSA-9768759	Regulation of NPAS4 gene expression	-0.489703	0.272263	0.761965
R-HSA-77588	SLBP Dependent Processing of Replication-Dependent Histone Pre-mRNAs	-0.526481	0.234776	0.761257
R-HSA-211163	AKT-mediated inactivation of FOXO1A	-0.506209	0.248235	0.754444
R-HSA-77595	Processing of Intronless Pre-mRNAs	-0.527454	0.225877	0.75333
R-HSA-6790901	rRNA modification in the nucleus and cytosol	-0.437293	0.312613	0.749906
R-HSA-8866910	TFAP2 (AP-2) family regulates transcription of growth factors and their receptors	-0.441679	0.30566	0.747338
R-HSA-9758881	Uptake of dietary cobalamins into enterocytes	-0.230553	0.516704	0.747257
R-HSA-399710	Activation of AMPA receptors	-0.65831	0.0885431	0.746853
R-HSA-426117	Cation-coupled Chloride cotransporters	-0.183578	0.561166	0.744744
R-HSA-9758920	Formation of lateral plate mesoderm	-0.275626	0.467228	0.742854
R-HSA-844615	The AIM2 inflammasome	-0.430453	0.307856	0.738309
R-HSA-8866911	TFAP2 (AP-2) family regulates transcription of cell cycle factors	-0.462552	0.274802	0.737354
R-HSA-73856	RNA Polymerase II Transcription Termination	-0.50614	0.229593	0.735733
R-HSA-9603505	NTRK3 as a dependence receptor	-0.350429	0.383452	0.73388
R-HSA-209931	Serotonin and melatonin biosynthesis	-0.298788	0.433988	0.732776
R-HSA-6803529	FGFR2 alternative splicing	-0.461225	0.27144	0.732666
R-HSA-9018681	Biosynthesis of protectins	-0.56024	0.17094	0.73118
R-HSA-72165	mRNA Splicing - Minor Pathway	-0.481726	0.24932	0.731046
R-HSA-425561	Sodium/Calcium exchangers	-0.33927	0.389495	0.728766
R-HSA-6798163	Choline catabolism	-0.319272	0.408298	0.72757
R-HSA-1483115	Hydrolysis of LPC	-0.222599	0.50355	0.726149
R-HSA-9013422	RHOBTB1 GTPase cycle	-0.436643	0.288905	0.725548
R-HSA-429914	Deadenylation-dependent mRNA decay	-0.466763	0.258751	0.725514
R-HSA-8943723	Regulation of PTEN mRNA translation	-0.503878	0.216742	0.72062
R-HSA-389397	Orexin and neuropeptides FF and QRFP bind to their respective receptors	-0.018539	0.700891	0.71943
R-HSA-2142712	Synthesis of 12-eicosatetraenoic acid derivatives	-0.170198	0.546525	0.716722
R-HSA-1300642	Sperm Motility And Taxes	-0.246399	0.470226	0.716625
R-HSA-425381	Bicarbonate transporters	-0.158091	0.558356	0.716447
R-HSA-2022923	Dermatan sulfate biosynthesis	-0.274999	0.439829	0.714829
R-HSA-69478	G2/M DNA replication checkpoint	-0.373214	0.341501	0.714714
R-HSA-9633012	Response of EIF2AK4 (GCN2) to amino acid deficiency	-0.442224	0.268922	0.711145
R-HSA-9729555	Sensory perception of sour taste	-0.115083	0.594813	0.709896
R-HSA-72086	mRNA Capping	-0.445624	0.261654	0.707278
R-HSA-5368286	Mitochondrial translation initiation	-0.426556	0.272827	0.699383
R-HSA-77111	Synthesis of Ketone Bodies	-0.410462	0.288213	0.698675
R-HSA-5334118	DNA methylation	-0.349465	0.340135	0.6896
R-HSA-75067	Processing of Capped Intronless Pre-mRNA	-0.502043	0.187394	0.689437
R-HSA-444411	Rhesus glycoproteins mediate ammonium transport	-0.0221813	0.666454	0.688635
R-HSA-8964058	HDL remodeling	-0.371386	0.317028	0.688415
R-HSA-390666	Serotonin receptors	-0.0579722	0.629908	0.68788
R-HSA-5576894	Phase 1 - inactivation of fast Na+ channels	0.071781	0.758725	0.686944
R-HSA-196843	Vitamin B2 (riboflavin) metabolism	-0.328355	0.358296	0.686651
R-HSA-8949275	RUNX3 Regulates Immune Response and Cell Migration	-0.49579	0.189682	0.685471
R-HSA-77288	mitochondrial fatty acid beta-oxidation of unsaturated fatty acids	-0.470022	0.215256	0.685278
R-HSA-8857538	PTK6 promotes HIF1A stabilization	-0.42472	0.259596	0.684316
R-HSA-1566977	Fibronectin matrix formation	-0.318801	0.364724	0.683525
R-HSA-5676934	Protein repair	-0.471291	0.211849	0.68314
R-HSA-9026357	NTF4 activates NTRK2 (TRKB) signaling	-0.503692	0.175985	0.679676
R-HSA-428543	Inactivation of CDC42 and RAC1	-0.412826	0.266196	0.679023
R-HSA-2142670	Synthesis of epoxy (EET) and dihydroxyeicosatrienoic acids (DHET)	-0.504676	0.172972	0.677647
R-HSA-75892	Platelet Adhesion to exposed collagen	-0.41713	0.258983	0.676113
R-HSA-5674499	Negative feedback regulation of MAPK pathway	-0.455316	0.2187	0.674016
R-HSA-113418	Formation of the Early Elongation Complex	-0.42677	0.24691	0.67368
R-HSA-351200	Interconversion of polyamines	-0.326071	0.346281	0.672352
R-HSA-166665	Terminal pathway of complement	-0.242556	0.428183	0.670739
R-HSA-1362277	Transcription of E2F targets under negative control by DREAM complex	-0.421814	0.248785	0.670599
R-HSA-8849473	PTK6 Expression	-0.37381	0.29441	0.66822
R-HSA-880009	Interconversion of 2-oxoglutarate and 2-hydroxyglutarate	-0.0541388	0.613184	0.667323
R-HSA-428890	Role of ABL in ROBO-SLIT signaling	-0.312313	0.352299	0.664612
R-HSA-2534343	Interaction With Cumulus Cells And The Zona Pellucida	-0.0427194	0.621709	0.664428
R-HSA-109703	PKB-mediated events	-0.252383	0.410872	0.663254
R-HSA-165160	PDE3B signalling	-0.252383	0.410872	0.663254
R-HSA-8869496	TFAP2A acts as a transcriptional repressor during retinoic acid induced cell differentiation	-0.383327	0.279893	0.66322
R-HSA-6804115	TP53 regulates transcription of additional cell cycle genes whose exact role in the p53 pathway remain uncertain	-0.418786	0.244158	0.662944
R-HSA-9856872	Malate-aspartate shuttle	-0.264724	0.396778	0.661501
R-HSA-1296061	HCN channels	-0.190792	0.469555	0.660346
R-HSA-1236977	Endosomal/Vacuolar pathway	-0.382885	0.27699	0.659875
R-HSA-4090294	SUMOylation of intracellular receptors	-0.428382	0.23	0.658382
R-HSA-8875513	MET interacts with TNS proteins	-0.379153	0.278831	0.657984
R-HSA-388479	Vasopressin-like receptors	-0.184101	0.472391	0.656492
R-HSA-844623	The IPAF inflammasome	-0.33169	0.324529	0.656219
R-HSA-194306	Neurophilin interactions with VEGF and VEGFR	-0.29975	0.356174	0.655923
R-HSA-171306	Packaging Of Telomere Ends	-0.33457	0.320206	0.654776
R-HSA-9827857	Specification of primordial germ cells	-0.409655	0.244746	0.654401
R-HSA-196836	Vitamin C (ascorbate) metabolism	-0.368715	0.285621	0.654336
R-HSA-8964026	Chylomicron clearance	-0.334318	0.315419	0.649738
R-HSA-5368287	Mitochondrial translation	-0.383411	0.264471	0.647882
R-HSA-9821002	Chromatin modifications during the maternal to zygotic transition (MZT)	-0.341132	0.306615	0.647747
R-HSA-9836573	Mitochondrial RNA degradation	-0.317269	0.330173	0.647441
R-HSA-190377	FGFR2b ligand binding and activation	-0.185917	0.461519	0.647436
R-HSA-110330	Recognition and association of DNA glycosylase with site containing an affected purine	-0.329604	0.316112	0.645716
R-HSA-110331	Cleavage of the damaged purine	-0.329604	0.316112	0.645716
R-HSA-73927	Depurination	-0.329604	0.316112	0.645716
R-HSA-8964315	G beta:gamma signalling through BTK	-0.331045	0.313583	0.644628
R-HSA-2514853	Condensation of Prometaphase Chromosomes	-0.420878	0.22366	0.644538
R-HSA-77075	RNA Pol II CTD phosphorylation and interaction with CE	-0.407029	0.236734	0.643764
R-HSA-426486	Small interfering RNA (siRNA) biogenesis	-0.410678	0.232618	0.643296
R-HSA-5661231	Metallothioneins bind metals	-0.248791	0.392882	0.641673
R-HSA-2022870	Chondroitin sulfate biosynthesis	-0.46695	0.174689	0.64164
R-HSA-9711097	Cellular response to starvation	-0.412096	0.228818	0.640915
R-HSA-389887	Beta-oxidation of pristanoyl-CoA	-0.0752406	0.565095	0.640336
R-HSA-5686938	Regulation of TLR by endogenous ligand	-0.448011	0.191542	0.639553
R-HSA-1538133	G0 and Early G1	-0.400616	0.238321	0.638937
R-HSA-9841251	Mitochondrial unfolded protein response (UPRmt)	-0.375337	0.263588	0.638925
R-HSA-6791226	Major pathway of rRNA processing in the nucleolus and cytosol	-0.390547	0.248296	0.638843
R-HSA-202430	Translocation of ZAP-70 to Immunological synapse	-0.426357	0.211744	0.638102
R-HSA-163841	Gamma carboxylation, hypusinylation, hydroxylation, and arylsulfatase activation	-0.412588	0.224651	0.637239
R-HSA-446343	Localization of the PINCH-ILK-PARVIN complex to focal adhesions	-0.45657	0.180632	0.637202
R-HSA-8964011	HDL clearance	-0.23822	0.398844	0.637063
R-HSA-1300645	Acrosome Reaction and Sperm:Oocyte Membrane Binding	-0.32694	0.309519	0.63646
R-HSA-8868773	rRNA processing in the nucleus and cytosol	-0.38806	0.248175	0.636236
R-HSA-9032845	Activated NTRK2 signals through CDK5	-0.388741	0.24707	0.635811
R-HSA-3134963	DEx/H-box helicases activate type I IFN and inflammatory cytokines production	-0.492207	0.143426	0.635632
R-HSA-191859	snRNP Assembly	-0.418568	0.21658	0.635148
R-HSA-194441	Metabolism of non-coding RNA	-0.418568	0.21658	0.635148
R-HSA-73728	RNA Polymerase I Promoter Opening	-0.338626	0.295466	0.634092
R-HSA-9652282	Drug-mediated inhibition of ERBB2 signaling	-0.417683	0.216248	0.633931
R-HSA-9843970	Regulation of endogenous retroelements by the Human Silencing Hub (HUSH) complex	-0.371856	0.261603	0.633459
R-HSA-75896	Plasmalogen biosynthesis	-0.00886871	0.623437	0.632306
R-HSA-1663150	The activation of arylsulfatases	-0.366204	0.264352	0.630556
R-HSA-8951911	RUNX3 regulates RUNX1-mediated transcription	-0.555313	0.0747966	0.63011
R-HSA-72202	Transport of Mature Transcript to Cytoplasm	-0.413973	0.215657	0.62963
R-HSA-2470946	Cohesin Loading onto Chromatin	-0.392914	0.232716	0.62563
R-HSA-1251985	Nuclear signaling by ERBB4	-0.375088	0.249039	0.624127
R-HSA-9816359	Maternal to zygotic transition (MZT)	-0.376679	0.247401	0.62408
R-HSA-3000471	Scavenging by Class B Receptors	-0.357669	0.265834	0.623503
R-HSA-73942	DNA Damage Reversal	-0.529372	0.0937721	0.623144
R-HSA-434313	Intracellular metabolism of fatty acids regulates insulin secretion	-0.5262	0.0968971	0.623097
R-HSA-2142816	Synthesis of (16-20)-hydroxyeicosatetraenoic acids (HETE)	-0.422865	0.200175	0.62304
R-HSA-8941856	RUNX3 regulates NOTCH signaling	-0.423938	0.198259	0.622197
R-HSA-190241	FGFR2 ligand binding and activation	-0.252933	0.36901	0.621943
R-HSA-110328	Recognition and association of DNA glycosylase with site containing an affected pyrimidine	-0.320444	0.301267	0.621711
R-HSA-110329	Cleavage of the damaged pyrimidine	-0.320444	0.301267	0.621711
R-HSA-73928	Depyrimidination	-0.320444	0.301267	0.621711
R-HSA-8939243	RUNX1 interacts with co-factors whose precise effect on RUNX1 targets is not known	-0.454526	0.167128	0.621654
R-HSA-110357	Displacement of DNA glycosylase by APEX1	-0.420037	0.201607	0.621644
R-HSA-429593	Inositol transporters	-0.32724	0.293681	0.62092
R-HSA-844455	The NLRP1 inflammasome	-0.503531	0.116605	0.620136
R-HSA-159236	Transport of Mature mRNA derived from an Intron-Containing Transcript	-0.41112	0.208288	0.619408
R-HSA-73929	Base-Excision Repair, AP Site Formation	-0.322529	0.295989	0.618518
R-HSA-9706374	FLT3 signaling through SRC family kinases	-0.421804	0.196552	0.618356
R-HSA-416572	Sema4D induced cell migration and growth-cone collapse	-0.430238	0.187968	0.618206
R-HSA-9768777	Regulation of NPAS4 gene transcription	-0.385428	0.232696	0.618124
R-HSA-6799990	Metal sequestration by antimicrobial proteins	-0.436135	0.181654	0.617789
R-HSA-6814848	Glycerophospholipid catabolism	-0.364622	0.252555	0.617177
R-HSA-9840373	Cellular response to mitochondrial stress	-0.368732	0.246947	0.615679
R-HSA-198933	Immunoregulatory interactions between a Lymphoid and a non-Lymphoid cell	-0.376751	0.238465	0.615216
R-HSA-1483191	Synthesis of PC	-0.459205	0.154523	0.613729
R-HSA-212300	PRC2 methylates histones and DNA	-0.337702	0.275865	0.613567
R-HSA-916853	Degradation of GABA	-0.317931	0.29495	0.612881
R-HSA-8950505	Gene and protein expression by JAK-STAT signaling after Interleukin-12 stimulation	-0.419669	0.192945	0.612614
R-HSA-9013419	RHOT2 GTPase cycle	-0.278077	0.333717	0.611793
R-HSA-1251932	PLCG1 events in ERBB2 signaling	-0.373981	0.237563	0.611544
R-HSA-68616	Assembly of the ORC complex at the origin of replication	-0.347808	0.263578	0.611386
R-HSA-2559584	Formation of Senescence-Associated Heterochromatin Foci (SAHF)	-0.385258	0.225752	0.61101
R-HSA-8874081	MET activates PTK2 signaling	-0.377908	0.232037	0.609945
R-HSA-3000157	Laminin interactions	-0.241208	0.368402	0.609609
R-HSA-5250924	B-WICH complex positively regulates rRNA expression	-0.351795	0.25756	0.609356
R-HSA-9013425	RHOT1 GTPase cycle	-0.274192	0.334835	0.609027
R-HSA-8866423	VLDL assembly	-0.368397	0.239964	0.608361
R-HSA-6804754	Regulation of TP53 Expression	-0.411608	0.196612	0.608219
R-HSA-174362	Transport and synthesis of PAPS	-0.364777	0.243399	0.608176
R-HSA-8847993	ERBB2 Activates PTK6 Signaling	-0.378072	0.229204	0.607276
R-HSA-5632681	Ligand-receptor interactions	-0.127286	0.479129	0.606415
R-HSA-8849468	PTK6 Regulates Proteins Involved in RNA Processing	-0.392261	0.213577	0.605838
R-HSA-2562578	TRIF-mediated programmed cell death	-0.421553	0.183298	0.60485
R-HSA-606279	Deposition of new CENPA-containing nucleosomes at the centromere	-0.340358	0.264226	0.604584
R-HSA-774815	Nucleosome assembly	-0.340358	0.264226	0.604584
R-HSA-9818749	Regulation of NFE2L2 gene expression	-0.460089	0.144263	0.604353
R-HSA-9013507	NOTCH3 Activation and Transmission of Signal to the Nucleus	-0.388194	0.213493	0.601687
R-HSA-2892245	POU5F1 (OCT4), SOX2, NANOG repress genes related to differentiation	-0.417772	0.18225	0.600022
R-HSA-8964041	LDL remodeling	-0.334187	0.265642	0.599829
R-HSA-3214858	RMTs methylate histone arginines	-0.380368	0.217637	0.598006
R-HSA-8848584	Wax and plasmalogen biosynthesis	-0.093309	0.50418	0.597489
R-HSA-373756	SDK interactions	0.030368	0.627741	0.597373
R-HSA-9670095	Inhibition of DNA recombination at telomere	-0.358019	0.237637	0.595656
R-HSA-202427	Phosphorylation of CD3 and TCR zeta chains	-0.386996	0.205778	0.592774
R-HSA-70263	Gluconeogenesis	-0.275746	0.31656	0.592305
R-HSA-8964539	Glutamate and glutamine metabolism	-0.234308	0.35726	0.591568
R-HSA-9013418	RHOBTB2 GTPase cycle	-0.395131	0.19611	0.591241
R-HSA-2243919	Crosslinking of collagen fibrils	-0.291599	0.299614	0.591214
R-HSA-216083	Integrin cell surface interactions	-0.372336	0.216474	0.58881
R-HSA-452723	Transcriptional regulation of pluripotent stem cells	-0.350535	0.23649	0.587025
R-HSA-480985	Synthesis of dolichyl-phosphate-glucose	-0.427863	0.158175	0.586038
R-HSA-9018682	Biosynthesis of maresins	-0.349768	0.235835	0.585602
R-HSA-5660489	MTF1 activates gene expression	-0.576311	0.00928446	0.585596
R-HSA-9818025	NFE2L2 regulating TCA cycle genes	-0.439264	0.145999	0.585263
R-HSA-8941332	RUNX2 regulates genes involved in cell migration	-0.484611	0.100243	0.584854
R-HSA-2022377	Metabolism of Angiotensinogen to Angiotensins	-0.281063	0.303155	0.584219
R-HSA-9018676	Biosynthesis of D-series resolvins	-0.372805	0.210456	0.583261
R-HSA-9027283	Erythropoietin activates STAT5	-0.338824	0.243961	0.582786
R-HSA-9031528	NR1H2 & NR1H3 regulate gene expression linked to triglyceride lipolysis in adipose	-0.312313	0.269847	0.58216
R-HSA-1475029	Reversible hydration of carbon dioxide	-0.260848	0.320424	0.581271
R-HSA-2214320	Anchoring fibril formation	-0.375444	0.20578	0.581224
R-HSA-77352	Beta oxidation of butanoyl-CoA to acetyl-CoA	-0.468601	0.112101	0.580702
R-HSA-170660	Adenylate cyclase activating pathway	-0.0909329	0.489729	0.580661
R-HSA-209822	Glycoprotein hormones	-0.0463328	0.533819	0.580152
R-HSA-75108	Activation, myristolyation of BID and translocation to mitochondria	-0.541475	0.0384387	0.579913
R-HSA-8951430	RUNX3 regulates WNT signaling	-0.410627	0.169214	0.579841
R-HSA-9026403	Biosynthesis of DPAn-3-derived 13-series resolvins	-0.403085	0.176684	0.579769
R-HSA-9708296	tRNA-derived small RNA (tsRNA or tRNA-related fragment, tRF) biogenesis	-0.331715	0.247631	0.579346
R-HSA-9012852	Signaling by NOTCH3	-0.372418	0.206796	0.579214
R-HSA-198693	AKT phosphorylates targets in the nucleus	-0.430938	0.14724	0.578177
R-HSA-9020558	Interleukin-2 signaling	-0.415437	0.162287	0.577724
R-HSA-111453	BH3-only proteins associate with and inactivate anti-apoptotic BCL-2 members	-0.402161	0.173891	0.576052
R-HSA-69560	Transcriptional activation of p53 responsive genes	-0.388577	0.187186	0.575763
R-HSA-69895	Transcriptional activation of cell cycle inhibitor p21	-0.388577	0.187186	0.575763
R-HSA-190239	FGFR3 ligand binding and activation	-0.332593	0.241299	0.573892
R-HSA-190372	FGFR3c ligand binding and activation	-0.332593	0.241299	0.573892
R-HSA-5250913	Positive epigenetic regulation of rRNA expression	-0.348052	0.224195	0.572247
R-HSA-399955	SEMA3A-Plexin repulsion signaling by inhibiting Integrin adhesion	-0.41881	0.152576	0.571386
R-HSA-392451	G beta:gamma signalling through PI3Kgamma	-0.406911	0.164449	0.571359
R-HSA-193692	Regulated proteolysis of p75NTR	-0.430703	0.140269	0.570972
R-HSA-400451	Free fatty acids regulate insulin secretion	-0.366449	0.202322	0.568771
R-HSA-9843743	Transcriptional regulation of brown and beige adipocyte differentiation	-0.367708	0.200104	0.567812
R-HSA-9844594	Transcriptional regulation of brown and beige adipocyte differentiation by EBF2	-0.367708	0.200104	0.567812
R-HSA-9732724	IFNG signaling activates MAPKs	-0.424624	0.142404	0.567029
R-HSA-2142850	Hyaluronan biosynthesis and export	-0.0758367	0.49045	0.566286
R-HSA-427389	ERCC6 (CSB) and EHMT2 (G9a) positively regulate rRNA expression	-0.344467	0.221644	0.56611
R-HSA-9706574	RHOBTB GTPase Cycle	-0.376138	0.18882	0.564958
R-HSA-5635851	GLI proteins bind promoters of Hh responsive genes to promote transcription	-0.24469	0.320082	0.564772
R-HSA-1963642	PI3K events in ERBB2 signaling	-0.352588	0.211923	0.564511
R-HSA-192456	Digestion of dietary lipid	-0.087006	0.477099	0.564105
R-HSA-418890	Role of second messengers in netrin-1 signaling	-0.163448	0.400465	0.563913
R-HSA-212718	EGFR interacts with phospholipase C-gamma	-0.349958	0.213539	0.563497
R-HSA-9845323	Regulation of endogenous retroelements by Piwi-interacting RNAs (piRNAs)	-0.332471	0.230993	0.563464
R-HSA-6785631	ERBB2 Regulates Cell Motility	-0.372356	0.190247	0.562603
R-HSA-9020591	Interleukin-12 signaling	-0.386502	0.175772	0.562274
R-HSA-193670	p75NTR negatively regulates cell cycle via SC1	-0.356603	0.205011	0.561615
R-HSA-392170	ADP signalling through P2Y purinoceptor 12	-0.341004	0.220323	0.561327
R-HSA-418886	Netrin mediated repulsion signals	-0.321035	0.240026	0.561061
R-HSA-2299718	Condensation of Prophase Chromosomes	-0.313861	0.24687	0.560731
R-HSA-71032	Propionyl-CoA catabolism	-0.4264	0.134313	0.560714
R-HSA-418217	G beta:gamma signalling through PLC beta	-0.290765	0.269003	0.559768
R-HSA-500657	Presynaptic function of Kainate receptors	-0.290765	0.269003	0.559768
R-HSA-210991	Basigin interactions	-0.3123	0.24713	0.559429
R-HSA-909733	Interferon alpha/beta signaling	-0.404514	0.15363	0.558144
R-HSA-1358803	Downregulation of ERBB2:ERBB3 signaling	-0.38326	0.174233	0.557493
R-HSA-2024101	CS/DS degradation	-0.282851	0.274146	0.556997
R-HSA-1362409	Mitochondrial iron-sulfur cluster biogenesis	-0.485787	0.071152	0.556939
R-HSA-9020265	Biosynthesis of aspirin-triggered D-series resolvins	-0.374716	0.181523	0.556239
R-HSA-427589	Type II Na+/Pi cotransporters	-0.48887	0.0670958	0.555965
R-HSA-350054	Notch-HLH transcription pathway	-0.388582	0.167382	0.555963
R-HSA-4411364	Binding of TCF/LEF:CTNNB1 to target gene promoters	-0.391429	0.164211	0.55564
R-HSA-427359	SIRT1 negatively regulates rRNA expression	-0.303444	0.251687	0.555131
R-HSA-8934593	Regulation of RUNX1 Expression and Activity	-0.40493	0.148804	0.553734
R-HSA-6814122	Cooperation of PDCL (PhLP1) and TRiC/CCT in G-protein beta folding	-0.336985	0.216398	0.553383
R-HSA-111932	CaMK IV-mediated phosphorylation of CREB	-0.381488	0.17116	0.552649
R-HSA-8935690	Digestion	-0.260515	0.291581	0.552096
R-HSA-166663	Initial triggering of complement	-0.239147	0.312879	0.552026
R-HSA-427413	NoRC negatively regulates rRNA expression	-0.33683	0.215187	0.552018
R-HSA-171319	Telomere Extension By Telomerase	-0.351712	0.200119	0.551831
R-HSA-6804760	Regulation of TP53 Activity through Methylation	-0.354644	0.196863	0.551507
R-HSA-9715370	Miro GTPase Cycle	-0.271318	0.279061	0.550379
R-HSA-3000480	Scavenging by Class A Receptors	-0.304171	0.245615	0.549785
R-HSA-1963640	GRB2 events in ERBB2 signaling	-0.36414	0.184816	0.548957
R-HSA-1362300	Transcription of E2F targets under negative control by p107 (RBL1) and p130 (RBL2) in complex with HDAC1	-0.369508	0.1789	0.548408
R-HSA-1592389	Activation of Matrix Metalloproteinases	-0.235654	0.312386	0.548039
R-HSA-390696	Adrenoceptors	-0.193811	0.352824	0.546636
R-HSA-9761174	Formation of intermediate mesoderm	-0.145287	0.401284	0.54657
R-HSA-422085	Synthesis, secretion, and deacylation of Ghrelin	-0.21342	0.332718	0.546138
R-HSA-2468052	Establishment of Sister Chromatid Cohesion	-0.367926	0.177939	0.545865
R-HSA-2122948	Activated NOTCH1 Transmits Signal to the Nucleus	-0.358719	0.186624	0.545343
R-HSA-73817	Purine ribonucleoside monophosphate biosynthesis	-0.370136	0.174999	0.545135
R-HSA-9824594	Regulation of MITF-M-dependent genes involved in apoptosis	-0.415362	0.129612	0.544974
R-HSA-8963693	Aspartate and asparagine metabolism	-0.418128	0.126535	0.544664
R-HSA-139910	Activation of BMF and translocation to mitochondria	-0.335175	0.20883	0.544006
R-HSA-400685	Sema4D in semaphorin signaling	-0.400249	0.143541	0.54379
R-HSA-8963691	Phenylalanine and tyrosine metabolism	-0.324303	0.218335	0.542638
R-HSA-532668	N-glycan trimming in the ER and Calnexin/Calreticulin cycle	-0.368338	0.174269	0.542607
R-HSA-1810476	RIP-mediated NFkB activation via ZBP1	-0.450988	0.0911633	0.542151
R-HSA-9668328	Sealing of the nuclear envelope (NE) by ESCRT-III	-0.337511	0.204482	0.541993
R-HSA-380108	Chemokine receptors bind chemokines	-0.238135	0.303823	0.541959
R-HSA-964739	N-glycan trimming and elongation in the cis-Golgi	-0.428829	0.112949	0.541779
R-HSA-210744	Regulation of gene expression in late stage (branching morphogenesis) pancreatic bud precursor cells	-0.361487	0.18	0.541486
R-HSA-877300	Interferon gamma signaling	-0.405935	0.13528	0.541214
R-HSA-111448	Activation of NOXA and translocation to mitochondria	-0.386826	0.153539	0.540365
R-HSA-217271	FMO oxidises nucleophiles	-0.485929	0.0538061	0.539735
R-HSA-190371	FGFR3b ligand binding and activation	-0.261842	0.277782	0.539624
R-HSA-9013508	NOTCH3 Intracellular Domain Regulates Transcription	-0.353318	0.186166	0.539484
R-HSA-450520	HuR (ELAVL1) binds and stabilizes mRNA	-0.367261	0.172019	0.53928
R-HSA-400042	Adrenaline,noradrenaline inhibits insulin secretion	-0.221631	0.316917	0.538548
R-HSA-1679131	Trafficking and processing of endosomal TLR	-0.363176	0.175022	0.538198
R-HSA-8850843	Phosphate bond hydrolysis by NTPDase proteins	-0.32828	0.209777	0.538057
R-HSA-5660526	Response to metal ions	-0.207422	0.330481	0.537903
R-HSA-428930	Thromboxane signalling through TP receptor	-0.298028	0.239338	0.537366
R-HSA-198323	AKT phosphorylates targets in the cytosol	-0.410631	0.126319	0.536951
R-HSA-71240	Tryptophan catabolism	-0.100761	0.435717	0.536479
R-HSA-8849472	PTK6 Down-Regulation	-0.296661	0.23938	0.536041
R-HSA-444821	Relaxin receptors	-0.135584	0.399863	0.535447
R-HSA-5620971	Pyroptosis	-0.415246	0.119742	0.534988
R-HSA-9027277	Erythropoietin activates Phospholipase C gamma (PLCG)	-0.250803	0.283291	0.534093
R-HSA-156582	Acetylation	-0.297371	0.236568	0.533938
R-HSA-8963888	Chylomicron assembly	-0.326019	0.20588	0.531899
R-HSA-9027307	Biosynthesis of maresin-like SPMs	-0.0344714	0.497359	0.53183
R-HSA-5578749	Transcriptional regulation by small RNAs	-0.341403	0.189774	0.531177
R-HSA-964975	Vitamin B6 activation to pyridoxal phosphate	-0.156592	0.374545	0.531136
R-HSA-5625970	RHO GTPases activate KTN1	-0.376534	0.154043	0.530577
R-HSA-389357	CD28 dependent PI3K/Akt signaling	-0.391508	0.139023	0.530531
R-HSA-5689901	Metalloprotease DUBs	-0.354569	0.175237	0.529806
R-HSA-418885	DCC mediated attractive signaling	-0.345284	0.184372	0.529656
R-HSA-157579	Telomere Maintenance	-0.332611	0.196874	0.529485
R-HSA-8963899	Plasma lipoprotein remodeling	-0.298809	0.230592	0.529401
R-HSA-9832991	Formation of the posterior neural plate	-0.356781	0.172439	0.52922
R-HSA-499943	Interconversion of nucleotide di- and triphosphates	-0.409846	0.119064	0.52891
R-HSA-77348	Beta oxidation of octanoyl-CoA to hexanoyl-CoA	-0.483534	0.0446195	0.528153
R-HSA-74217	Purine salvage	-0.486482	0.0415166	0.527999
R-HSA-5661270	Formation of xylulose-5-phosphate	-0.319547	0.207952	0.527499
R-HSA-444473	Formyl peptide receptors bind formyl peptides and many other ligands	-0.359394	0.167874	0.527268
R-HSA-390466	Chaperonin-mediated protein folding	-0.350442	0.176403	0.526845
R-HSA-9701898	STAT3 nuclear events downstream of ALK signaling	-0.374524	0.152128	0.526652
R-HSA-6781823	Formation of TC-NER Pre-Incision Complex	-0.368598	0.157413	0.526011
R-HSA-177162	Conjugation of phenylacetate with glutamine	0.0712164	0.596749	0.525533
R-HSA-446107	Type I hemidesmosome assembly	-0.315648	0.209493	0.525142
R-HSA-167021	PLC-gamma1 signalling	-0.192911	0.331299	0.52421
R-HSA-204626	Hypusine synthesis from eIF5A-lysine	-0.511564	0.0126102	0.524174
R-HSA-112382	Formation of RNA Pol II elongation complex	-0.356832	0.166793	0.523625
R-HSA-75955	RNA Polymerase II Transcription Elongation	-0.356832	0.166793	0.523625
R-HSA-391251	Protein folding	-0.346372	0.177172	0.523544
R-HSA-190375	FGFR2c ligand binding and activation	-0.239179	0.28426	0.523439
R-HSA-9926550	Regulation of MITF-M-dependent genes involved in extracellular matrix, focal adhesion and epithelial-to-mesenchymal transition	-0.417739	0.105481	0.52322
R-HSA-8963901	Chylomicron remodeling	-0.311705	0.21137	0.523074
R-HSA-70268	Pyruvate metabolism	-0.382653	0.140175	0.522827
R-HSA-190374	FGFR1c and Klotho ligand binding and activation	-0.229208	0.290759	0.519967
R-HSA-8964540	Alanine metabolism	-0.175083	0.344884	0.519967
R-HSA-2408552	Methylation of MeSeH for excretion	-0.153313	0.366614	0.519927
R-HSA-211935	Fatty acids	0.00790732	0.52769	0.519783
R-HSA-73776	RNA Polymerase II Promoter Escape	-0.33612	0.183645	0.519764
R-HSA-73779	RNA Polymerase II Transcription Pre-Initiation And Promoter Opening	-0.33612	0.183645	0.519764
R-HSA-75953	RNA Polymerase II Transcription Initiation	-0.33612	0.183645	0.519764
R-HSA-76042	RNA Polymerase II Transcription Initiation And Promoter Clearance	-0.33612	0.183645	0.519764
R-HSA-390650	Histamine receptors	-0.0402673	0.479247	0.519515
R-HSA-141334	PAOs oxidise polyamines to amines	0.08235	0.6017	0.51935
R-HSA-140180	COX reactions	0.0913442	0.610611	0.519267
R-HSA-3296197	Hydroxycarboxylic acid-binding receptors	0.0854856	0.604753	0.519267
R-HSA-1296025	ATP sensitive Potassium channels	0.143729	0.662871	0.519142
R-HSA-5250941	Negative epigenetic regulation of rRNA expression	-0.317841	0.201232	0.519073
R-HSA-390471	Association of TriC/CCT with target proteins during biosynthesis	-0.351642	0.167381	0.519023
R-HSA-416700	Other semaphorin interactions	-0.231415	0.287597	0.519012
R-HSA-8849469	PTK6 Regulates RTKs and Their Effectors AKT1 and DOK1	-0.361074	0.157936	0.51901
R-HSA-350864	Regulation of thyroid hormone activity	0.200264	0.719201	0.518937
R-HSA-447115	Interleukin-12 family signaling	-0.366042	0.152656	0.518699
R-HSA-1299287	Tandem pore domain halothane-inhibited K+ channel (THIK)	0.313531	0.832013	0.518482
R-HSA-9616222	Transcriptional regulation of granulopoiesis	-0.348678	0.169623	0.518301
R-HSA-73884	Base Excision Repair	-0.313363	0.20492	0.518283
R-HSA-9027604	Biosynthesis of electrophilic 蠅-3 PUFA oxo-derivatives	-0.374807	0.143465	0.518272
R-HSA-9037628	Rhesus blood group biosynthesis	0.441208	0.95932	0.518112
R-HSA-75109	Triglyceride biosynthesis	-0.275317	0.242561	0.517878
R-HSA-426048	Arachidonate production from DAG	-0.0663503	0.45104	0.51739
R-HSA-1614517	Sulfide oxidation to sulfate	-0.280932	0.236134	0.517067
R-HSA-9762293	Regulation of CDH11 gene transcription	-0.338259	0.178389	0.516649
R-HSA-1296067	Potassium transport channels	-0.502145	0.0136964	0.515842
R-HSA-174430	Telomere C-strand synthesis initiation	-0.360893	0.154782	0.515675
R-HSA-9013957	TLR3-mediated TICAM1-dependent programmed cell death	-0.443599	0.0719709	0.51557
R-HSA-428542	Regulation of commissural axon pathfinding by SLIT and ROBO	-0.276969	0.237145	0.514114
R-HSA-376172	DSCAM interactions	0.0491599	0.562905	0.513745
R-HSA-9032500	Activated NTRK2 signals through FYN	-0.387351	0.126338	0.513689
R-HSA-1369007	Mitochondrial ABC transporters	-0.239141	0.273418	0.512559
R-HSA-2122947	NOTCH1 Intracellular Domain Regulates Transcription	-0.348199	0.163927	0.512126
R-HSA-8941284	RUNX2 regulates chondrocyte maturation	-0.245173	0.266291	0.511463
R-HSA-1855231	Synthesis of IPs in the ER lumen	-0.4639	0.0473636	0.511263
R-HSA-442729	CREB1 phosphorylation through the activation of CaMKII/CaMKK/CaMKIV cascasde	-0.358699	0.152543	0.511242
R-HSA-179812	GRB2 events in EGFR signaling	-0.351768	0.159192	0.51096
R-HSA-201722	Formation of the beta-catenin:TCF transactivating complex	-0.329495	0.181249	0.510744
R-HSA-2173796	SMAD2/SMAD3:SMAD4 heterotrimer regulates transcription	-0.370649	0.140093	0.510742
R-HSA-9707564	Cytoprotection by HMOX1	-0.36258	0.147292	0.509872
R-HSA-77305	Beta oxidation of palmitoyl-CoA to myristoyl-CoA	-0.464935	0.0448239	0.509759
R-HSA-1268020	Mitochondrial protein import	-0.265143	0.244612	0.509755
R-HSA-2179392	EGFR Transactivation by Gastrin	-0.341683	0.167841	0.509523
R-HSA-159231	Transport of Mature mRNA Derived from an Intronless Transcript	-0.322967	0.186486	0.509453
R-HSA-674695	RNA Polymerase II Pre-transcription Events	-0.339551	0.16976	0.50931
R-HSA-9925561	Developmental Lineage of Pancreatic Acinar Cells	-0.144536	0.364521	0.509057
R-HSA-201556	Signaling by ALK	-0.365134	0.143676	0.50881
R-HSA-9707587	Regulation of HMOX1 expression and activity	-0.321673	0.18695	0.508623
R-HSA-197264	Nicotinamide salvaging	-0.302378	0.205979	0.508356
R-HSA-879415	Advanced glycosylation endproduct receptor signaling	-0.347697	0.160588	0.508285
R-HSA-1234158	Regulation of gene expression by Hypoxia-inducible Factor	-0.372192	0.135511	0.507702
R-HSA-1606322	ZBP1(DAI) mediated induction of type I IFNs	-0.423522	0.084141	0.507663
R-HSA-140834	Extrinsic Pathway of Fibrin Clot Formation	-0.296184	0.211114	0.507298
R-HSA-1474151	Tetrahydrobiopterin (BH4) synthesis, recycling, salvage and regulation	-0.363199	0.143964	0.507162
R-HSA-446199	Synthesis of Dolichyl-phosphate	-0.045354	0.461341	0.506695
R-HSA-9037629	Lewis blood group biosynthesis	-0.142025	0.364419	0.506444
R-HSA-4570464	SUMOylation of RNA binding proteins	-0.363197	0.142409	0.505606
R-HSA-8963896	HDL assembly	-0.339293	0.16587	0.505163
R-HSA-2559585	Oncogene Induced Senescence	-0.386141	0.11902	0.505161
R-HSA-3301854	Nuclear Pore Complex (NPC) Disassembly	-0.339714	0.164569	0.504283
R-HSA-9640463	Wax biosynthesis	-0.276312	0.227799	0.504111
R-HSA-111457	Release of apoptotic factors from the mitochondria	-0.36981	0.133937	0.503747
R-HSA-74713	IRS activation	-0.276333	0.226729	0.503063
R-HSA-159418	Recycling of bile acids and salts	-0.339672	0.163343	0.503015
R-HSA-3000484	Scavenging by Class F Receptors	-0.308868	0.193753	0.50262
R-HSA-77346	Beta oxidation of decanoyl-CoA to octanoyl-CoA-CoA	-0.461103	0.0413089	0.502411
R-HSA-5660668	CLEC7A/inflammasome pathway	-0.466574	0.0356686	0.502242
R-HSA-9818030	NFE2L2 regulating tumorigenic genes	-0.421887	0.0797006	0.501587
R-HSA-1250196	SHC1 events in ERBB2 signaling	-0.33699	0.164374	0.501364
R-HSA-198745	Signalling to STAT3	-0.3709	0.130388	0.501288
R-HSA-159227	Transport of the SLBP independent Mature mRNA	-0.313491	0.187683	0.501173
R-HSA-8949664	Processing of SMDT1	-0.390077	0.11101	0.501087
R-HSA-159234	Transport of Mature mRNAs Derived from Intronless Transcripts	-0.321165	0.179794	0.500959
R-HSA-901042	Calnexin/calreticulin cycle	-0.351583	0.149337	0.50092
R-HSA-6791312	TP53 Regulates Transcription of Cell Cycle Genes	-0.351579	0.147994	0.499573
R-HSA-8956320	Nucleotide biosynthesis	-0.353431	0.146047	0.499479
R-HSA-1483213	Synthesis of PE	-0.387087	0.111649	0.498737
R-HSA-186712	Regulation of beta-cell development	-0.3378	0.16084	0.49864
R-HSA-2022090	Assembly of collagen fibrils and other multimeric structures	-0.236473	0.26048	0.496953
R-HSA-9619229	Activation of RAC1 downstream of NMDARs	-0.419822	0.0770416	0.496864
R-HSA-8866907	Activation of the TFAP2 (AP-2) family of transcription factors	-0.385704	0.111129	0.496833
R-HSA-9026527	Activated NTRK2 signals through PLCG1	-0.184963	0.311842	0.496805
R-HSA-1222556	ROS and RNS production in phagocytes	-0.243967	0.251465	0.495431
R-HSA-139915	Activation of PUMA and translocation to mitochondria	-0.369228	0.126092	0.49532
R-HSA-8936459	RUNX1 regulates genes involved in megakaryocyte differentiation and platelet function	-0.32965	0.165664	0.495313
R-HSA-8983711	OAS antiviral response	-0.43991	0.0553584	0.495268
R-HSA-201451	Signaling by BMP	-0.256392	0.238078	0.494471
R-HSA-8963898	Plasma lipoprotein assembly	-0.333661	0.160732	0.494394
R-HSA-445144	Signal transduction by L1	-0.374101	0.119696	0.493797
R-HSA-180336	SHC1 events in EGFR signaling	-0.346296	0.146681	0.492977
R-HSA-159230	Transport of the SLBP Dependant Mature mRNA	-0.311797	0.181161	0.492958
R-HSA-1483076	Synthesis of CL	-0.711881	-0.218977	0.492904
R-HSA-205043	NRIF signals cell death from the nucleus	-0.321864	0.170757	0.492622
R-HSA-6803211	TP53 Regulates Transcription of Death Receptors and Ligands	-0.350874	0.141493	0.492367
R-HSA-2173789	TGF-beta receptor signaling activates SMADs	-0.323575	0.168356	0.491931
R-HSA-180292	GAB1 signalosome	-0.329543	0.162099	0.491642
R-HSA-418457	cGMP effects	-0.0512828	0.440286	0.491569
R-HSA-8943724	Regulation of PTEN gene transcription	-0.34893	0.142306	0.491236
R-HSA-2559586	DNA Damage/Telomere Stress Induced Senescence	-0.316052	0.175031	0.491083
R-HSA-166187	Mitochondrial Uncoupling	-0.0564603	0.434247	0.490707
R-HSA-8963684	Tyrosine catabolism	-0.214129	0.276457	0.490586
R-HSA-8964038	LDL clearance	-0.285606	0.204915	0.490521
R-HSA-110362	POLB-Dependent Long Patch Base Excision Repair	-0.32283	0.167492	0.490322
R-HSA-2730905	Role of LAT2/NTAL/LAB on calcium mobilization	-0.355363	0.134246	0.489609
R-HSA-6803205	TP53 regulates transcription of several additional cell death genes whose specific roles in p53-dependent apoptosis remain uncertain	-0.337669	0.151604	0.489273
R-HSA-1253288	Downregulation of ERBB4 signaling	-0.349039	0.140031	0.48907
R-HSA-389957	Prefoldin mediated transfer of substrate to CCT/TriC	-0.282924	0.206066	0.48899
R-HSA-9830674	Formation of the ureteric bud	-0.182736	0.305511	0.488246
R-HSA-456926	Thrombin signalling through proteinase activated receptors (PARs)	-0.345818	0.142237	0.488056
R-HSA-9818028	NFE2L2 regulates pentose phosphate pathway genes	-0.398052	0.088349	0.486401
R-HSA-174437	Removal of the Flap Intermediate from the C-strand	-0.355211	0.130922	0.486133
R-HSA-1462054	Alpha-defensins	-0.345382	0.140628	0.48601
R-HSA-174048	APC/C:Cdc20 mediated degradation of Cyclin B	-0.302803	0.182656	0.485459
R-HSA-9759475	Regulation of CDH11 Expression and Function	-0.343946	0.141418	0.485365
R-HSA-2173795	Downregulation of SMAD2/3:SMAD4 transcriptional activity	-0.332371	0.152791	0.485162
R-HSA-629594	Highly calcium permeable postsynaptic nicotinic acetylcholine receptors	-0.397185	0.0874293	0.484614
R-HSA-446210	Synthesis of UDP-N-acetyl-glucosamine	-0.356497	0.12733	0.483828
R-HSA-141405	Inhibition of the proteolytic activity of APC/C required for the onset of anaphase by mitotic spindle checkpoint components	-0.344783	0.139038	0.483821
R-HSA-141430	Inactivation of APC/C via direct inhibition of the APC/C complex	-0.344783	0.139038	0.483821
R-HSA-9824585	Regulation of MITF-M-dependent genes involved in pigmentation	-0.322245	0.161526	0.483771
R-HSA-9022702	MECP2 regulates transcription of neuronal ligands	-0.368554	0.114824	0.483378
R-HSA-9857377	Regulation of MITF-M-dependent genes involved in lysosome biogenesis and autophagy	-0.297404	0.185004	0.482408
R-HSA-176407	Conversion from APC/C:Cdc20 to APC/C:Cdh1 in late anaphase	-0.300298	0.182085	0.482383
R-HSA-389977	Post-chaperonin tubulin folding pathway	-0.266633	0.215434	0.482067
R-HSA-196819	Vitamin B1 (thiamin) metabolism	-0.0698148	0.411007	0.480822
R-HSA-983170	Antigen Presentation: Folding, assembly and peptide loading of class I MHC	-0.323156	0.157568	0.480723
R-HSA-163560	Triglyceride catabolism	-0.336169	0.144522	0.480691
R-HSA-901032	ER Quality Control Compartment (ERQC)	-0.364968	0.115677	0.480645
R-HSA-420092	Glucagon-type ligand receptors	-0.244301	0.235959	0.48026
R-HSA-389359	CD28 dependent Vav1 pathway	-0.362828	0.117269	0.480097
R-HSA-170145	Phosphorylation of proteins involved in the G2/M transition by Cyclin A:Cdc2 complexes	-0.33754	0.142325	0.479865
R-HSA-389958	Cooperation of Prefoldin and TriC/CCT in actin and tubulin folding	-0.283269	0.196388	0.479657
R-HSA-203927	MicroRNA (miRNA) biogenesis	-0.38404	0.0955949	0.479635
R-HSA-112311	Neurotransmitter clearance	-0.206097	0.273066	0.479163
R-HSA-8849474	PTK6 Activates STAT3	-0.363184	0.114751	0.477935
R-HSA-933543	NF-kB activation through FADD/RIP-1 pathway mediated by caspase-8 and -10	-0.439158	0.0383859	0.477544
R-HSA-9754706	Atorvastatin ADME	-0.204846	0.272196	0.477042
R-HSA-211958	Miscellaneous substrates	0.0363996	0.513326	0.476926
R-HSA-73843	5-Phosphoribose 1-diphosphate biosynthesis	-0.466499	0.0103933	0.476892
R-HSA-5621480	Dectin-2 family	-0.362547	0.114299	0.476846
R-HSA-9026286	Biosynthesis of DPAn-3-derived protectins and resolvins	-0.370514	0.105805	0.476319
R-HSA-167060	NGF processing	-0.179272	0.296939	0.476211
R-HSA-9036866	Expression and Processing of Neurotrophins	-0.179272	0.296939	0.476211
R-HSA-73772	RNA Polymerase I Promoter Escape	-0.281149	0.194686	0.475835
R-HSA-9029558	NR1H2 & NR1H3 regulate gene expression linked to lipogenesis	-0.269048	0.206283	0.475331
R-HSA-210745	Regulation of gene expression in beta cells	-0.336683	0.138622	0.475305
R-HSA-177128	Conjugation of salicylate with glycine	0.16349	0.638249	0.474759
R-HSA-69205	G1/S-Specific Transcription	-0.313766	0.160663	0.474429
R-HSA-140837	Intrinsic Pathway of Fibrin Clot Formation	-0.145015	0.329329	0.474344
R-HSA-1912399	Pre-NOTCH Processing in the Endoplasmic Reticulum	-0.493287	-0.0193218	0.473965
R-HSA-179409	APC-Cdc20 mediated degradation of Nek2A	-0.310889	0.162727	0.473616
R-HSA-180786	Extension of Telomeres	-0.324465	0.149139	0.473604
R-HSA-9026290	Biosynthesis of DPAn-3-derived maresins	-0.393653	0.079906	0.473559
R-HSA-6782210	Gap-filling DNA repair synthesis and ligation in TC-NER	-0.354923	0.118424	0.473347
R-HSA-70221	Glycogen breakdown (glycogenolysis)	-0.248758	0.223807	0.472565
R-HSA-73854	RNA Polymerase I Promoter Clearance	-0.307705	0.164493	0.472198
R-HSA-9860276	SLC15A4:TASL-dependent IRF5 activation	-0.415728	0.0563467	0.472075
R-HSA-3214815	HDACs deacetylate histones	-0.308431	0.163556	0.471987
R-HSA-4615885	SUMOylation of DNA replication proteins	-0.324275	0.147597	0.471871
R-HSA-2173788	Downregulation of TGF-beta receptor signaling	-0.327562	0.143855	0.471417
R-HSA-9865881	Complex III assembly	-0.321373	0.14955	0.470924
R-HSA-419037	NCAM1 interactions	-0.0612032	0.408938	0.470141
R-HSA-156588	Glucuronidation	-0.087454	0.381546	0.469
R-HSA-5358565	Mismatch repair (MMR) directed by MSH2:MSH6 (MutSalpha)	-0.266276	0.202621	0.468896
R-HSA-8875878	MET promotes cell motility	-0.315995	0.152837	0.468832
R-HSA-611105	Respiratory electron transport	-0.273501	0.1953	0.468801
R-HSA-9759476	Regulation of Homotypic Cell-Cell Adhesion	-0.326306	0.142493	0.468798
R-HSA-9764260	Regulation of Expression and Function of Type II Classical Cadherins	-0.326306	0.142493	0.468798
R-HSA-6806664	Metabolism of vitamin K	-0.272354	0.196235	0.468588
R-HSA-211736	Stimulation of the cell death response by PAK-2p34	-0.470755	-0.00233291	0.468422
R-HSA-5696394	DNA Damage Recognition in GG-NER	-0.291847	0.175946	0.467793
R-HSA-199920	CREB phosphorylation	-0.460573	0.00691776	0.467491
R-HSA-397795	G-protein beta:gamma signalling	-0.354391	0.112955	0.467346
R-HSA-8863795	Downregulation of ERBB2 signaling	-0.347375	0.119614	0.466989
R-HSA-156587	Amino Acid conjugation	0.153459	0.620194	0.466735
R-HSA-159424	Conjugation of carboxylic acids	0.153459	0.620194	0.466735
R-HSA-177135	Conjugation of benzoate with glycine	0.153459	0.620194	0.466735
R-HSA-3322077	Glycogen synthesis	-0.310158	0.156376	0.466535
R-HSA-9749641	Aspirin ADME	-0.167304	0.299211	0.466515
R-HSA-73943	Reversal of alkylation damage by DNA dioxygenases	-0.496572	-0.0301829	0.466389
R-HSA-8853884	Transcriptional Regulation by VENTX	-0.345589	0.120729	0.466319
R-HSA-1442490	Collagen degradation	-0.247775	0.218115	0.465889
R-HSA-68689	CDC6 association with the ORC:origin complex	-0.242285	0.223493	0.465778
R-HSA-203615	eNOS activation	-0.304676	0.160903	0.465579
R-HSA-6781827	Transcription-Coupled Nucleotide Excision Repair (TC-NER)	-0.357469	0.107695	0.465164
R-HSA-5218920	VEGFR2 mediated vascular permeability	-0.339079	0.126055	0.465135
R-HSA-9018896	Biosynthesis of E-series 18(S)-resolvins	-0.31902	0.146106	0.465126
R-HSA-9623433	NR1H2 & NR1H3 regulate gene expression to control bile acid homeostasis	-0.394123	0.070869	0.464992
R-HSA-392851	Prostacyclin signalling through prostacyclin receptor	-0.228379	0.236477	0.464855
R-HSA-9856532	Mechanical load activates signaling by PIEZO1 and integrins in osteocytes	-0.366957	0.0976252	0.464582
R-HSA-977443	GABA receptor activation	-0.19477	0.269477	0.464247
R-HSA-6782135	Dual incision in TC-NER	-0.352068	0.112142	0.46421
R-HSA-9861718	Regulation of pyruvate metabolism	-0.333716	0.130396	0.464112
R-HSA-1638074	Keratan sulfate/keratin metabolism	-0.182434	0.28113	0.463565
R-HSA-73864	RNA Polymerase I Transcription	-0.305403	0.158146	0.463549
R-HSA-156711	Polo-like kinase mediated events	-0.296847	0.166248	0.463095
R-HSA-6804758	Regulation of TP53 Activity through Acetylation	-0.342975	0.119919	0.462894
R-HSA-74182	Ketone body metabolism	-0.127774	0.33486	0.462635
R-HSA-8875791	MET activates STAT3	-0.378474	0.0841359	0.46261
R-HSA-1221632	Meiotic synapsis	-0.257978	0.204313	0.462291
R-HSA-162791	Attachment of GPI anchor to uPAR	-0.18245	0.279643	0.462093
R-HSA-9639288	Amino acids regulate mTORC1	-0.269242	0.192808	0.46205
R-HSA-8978934	Metabolism of cofactors	-0.337995	0.124019	0.462014
R-HSA-8876725	Protein methylation	-0.299485	0.162344	0.461829
R-HSA-629597	Highly calcium permeable nicotinic acetylcholine receptors	-0.296098	0.165195	0.461293
R-HSA-112126	ALKBH3 mediated reversal of alkylation damage	-0.47575	-0.0145872	0.461162
R-HSA-380612	Metabolism of serotonin	0.0427668	0.503574	0.460807
R-HSA-1912420	Pre-NOTCH Processing in Golgi	-0.411885	0.0483816	0.460267
R-HSA-111446	Activation of BIM and translocation to mitochondria	-0.315968	0.143133	0.459101
R-HSA-189085	Digestion of dietary carbohydrate	-0.341517	0.117264	0.458781
R-HSA-9818035	NFE2L2 regulating ER-stress associated genes	-0.389835	0.0688335	0.458669
R-HSA-1461973	Defensins	-0.290277	0.168374	0.458651
R-HSA-6804114	TP53 Regulates Transcription of Genes Involved in G2 Cell Cycle Arrest	-0.330563	0.127793	0.458356
R-HSA-5666185	RHO GTPases Activate Rhotekin and Rhophilins	-0.343891	0.11328	0.457171
R-HSA-5223345	Miscellaneous transport and binding events	-0.254335	0.202276	0.45661
R-HSA-390450	Folding of actin by CCT/TriC	-0.244695	0.211743	0.456438
R-HSA-3214842	HDMs demethylate histones	-0.308698	0.147507	0.456205
R-HSA-2485179	Activation of the phototransduction cascade	-0.163441	0.292211	0.455653
R-HSA-9755088	Ribavirin ADME	-0.246018	0.209448	0.455466
R-HSA-1368082	RORA activates gene expression	-0.430569	0.0245108	0.45508
R-HSA-9013695	NOTCH4 Intracellular Domain Regulates Transcription	-0.349179	0.105357	0.454536
R-HSA-6807505	RNA polymerase II transcribes snRNA genes	-0.355713	0.0988058	0.454518
R-HSA-1483148	Synthesis of PG	-0.217843	0.235408	0.453251
R-HSA-2142700	Biosynthesis of Lipoxins (LX)	-0.357992	0.0950345	0.453027
R-HSA-9818032	NFE2L2 regulating MDR associated enzymes	-0.374342	0.0784223	0.452765
R-HSA-881907	Gastrin-CREB signalling pathway via PKC and MAPK	-0.336587	0.116128	0.452715
R-HSA-9819196	Zygotic genome activation (ZGA)	-0.325752	0.126639	0.452391
R-HSA-6803544	Ion influx/efflux at host-pathogen interface	-0.308276	0.144003	0.452278
R-HSA-8948216	Collagen chain trimerization	-0.115149	0.33648	0.451628
R-HSA-2151201	Transcriptional activation of mitochondrial biogenesis	-0.317168	0.134255	0.451423
R-HSA-164952	The role of Nef in HIV-1 replication and disease pathogenesis	-0.339308	0.111793	0.451101
R-HSA-174414	Processive synthesis on the C-strand of the telomere	-0.334258	0.116426	0.450684
R-HSA-69541	Stabilization of p53	-0.305372	0.14524	0.450612
R-HSA-1247673	Erythrocytes take up oxygen and release carbon dioxide	-0.0909112	0.359431	0.450342
R-HSA-5358508	Mismatch Repair	-0.255953	0.19424	0.450193
R-HSA-174411	Polymerase switching on the C-strand of the telomere	-0.338755	0.11079	0.449545
R-HSA-417973	Adenosine P1 receptors	0.164002	0.613196	0.449194
R-HSA-390651	Dopamine receptors	0.110052	0.559181	0.449129
R-HSA-205017	NFG and proNGF binds to p75NTR	0.109529	0.558626	0.449098
R-HSA-9032759	NTRK2 activates RAC1	-0.359092	0.0893513	0.448443
R-HSA-9617629	Regulation of FOXO transcriptional activity by acetylation	-0.356788	0.0915592	0.448347
R-HSA-2672351	Stimuli-sensing channels	-0.292656	0.155493	0.448149
R-HSA-389948	Co-inhibition by PD-1	-0.303993	0.143932	0.447925
R-HSA-8934903	Receptor Mediated Mitophagy	-0.365495	0.0823862	0.447881
R-HSA-9645460	Alpha-protein kinase 1 signaling pathway	-0.308281	0.139128	0.447409
R-HSA-8866376	Reelin signalling pathway	-0.317367	0.129965	0.447333
R-HSA-9837999	Mitochondrial protein degradation	-0.253391	0.193941	0.447332
R-HSA-2160916	Hyaluronan uptake and degradation	-0.304173	0.143094	0.447267
R-HSA-73762	RNA Polymerase I Transcription Initiation	-0.306383	0.140815	0.447198
R-HSA-9854311	Maturation of TCA enzymes and regulation of TCA cycle	-0.370367	0.0768251	0.447192
R-HSA-3299685	Detoxification of Reactive Oxygen Species	-0.312658	0.134065	0.446723
R-HSA-111957	Cam-PDE 1 activation	0.0461231	0.49273	0.446607
R-HSA-209563	Axonal growth stimulation	-0.337671	0.108935	0.446605
R-HSA-3000178	ECM proteoglycans	-0.283622	0.16295	0.446572
R-HSA-114604	GPVI-mediated activation cascade	-0.333176	0.113033	0.44621
R-HSA-2408508	Metabolism of ingested SeMet, Sec, MeSec into H2Se	-0.176931	0.269036	0.445968
R-HSA-6803204	TP53 Regulates Transcription of Genes Involved in Cytochrome C Release	-0.346223	0.099638	0.445861
R-HSA-9851151	MDK and PTN in ALK signaling	-0.282264	0.163312	0.445576
R-HSA-5656169	Termination of translesion DNA synthesis	-0.353389	0.0915971	0.444986
R-HSA-5358606	Mismatch repair (MMR) directed by MSH2:MSH3 (MutSbeta)	-0.25807	0.186564	0.444635
R-HSA-1482922	Acyl chain remodelling of PI	-0.130739	0.313701	0.44444
R-HSA-5654227	Phospholipase C-mediated cascade; FGFR3	-0.203984	0.238974	0.442959
R-HSA-391160	Signal regulatory protein family interactions	-0.284276	0.158287	0.442563
R-HSA-193681	Ceramide signalling	0.0157783	0.458237	0.442458
R-HSA-211979	Eicosanoids	-0.0865239	0.3543	0.440824
R-HSA-8941858	Regulation of RUNX3 expression and activity	-0.304029	0.136508	0.440537
R-HSA-211000	Gene Silencing by RNA	-0.292761	0.147326	0.440087
R-HSA-209560	NF-kB is activated and signals survival	-0.344109	0.095846	0.439955
R-HSA-9029569	NR1H3 & NR1H2 regulate gene expression linked to cholesterol transport and efflux	-0.31983	0.120045	0.439875
R-HSA-6784531	tRNA processing in the nucleus	-0.366028	0.0736401	0.439668
R-HSA-9818026	NFE2L2 regulating inflammation associated genes	-0.401857	0.0377454	0.439603
R-HSA-936837	Ion transport by P-type ATPases	-0.240576	0.198289	0.438865
R-HSA-390522	Striated Muscle Contraction	-0.222437	0.216168	0.438605
R-HSA-6803157	Antimicrobial peptides	-0.277695	0.160843	0.438537
R-HSA-9033807	ABO blood group biosynthesis	-0.104661	0.333855	0.438516
R-HSA-5625886	Activated PKN1 stimulates transcription of AR (androgen receptor) regulated genes KLK2 and KLK3	-0.225084	0.213284	0.438368
R-HSA-187015	Activation of TRKA receptors	-0.0957324	0.342479	0.438211
R-HSA-9013407	RHOH GTPase cycle	-0.301686	0.136415	0.438101
R-HSA-3214841	PKMTs methylate histone lysines	-0.344674	0.093417	0.438091
R-HSA-9023661	Biosynthesis of E-series 18(R)-resolvins	-0.320606	0.117146	0.437751
R-HSA-168638	NOD1/2 Signaling Pathway	-0.344784	0.0925585	0.437343
R-HSA-166208	mTORC1-mediated signalling	-0.331898	0.10493	0.436827
R-HSA-444257	RSK activation	-0.397747	0.038783	0.43653
R-HSA-8982491	Glycogen metabolism	-0.294067	0.142405	0.436473
R-HSA-8985586	SLIT2:ROBO1 increases RHOA activity	-0.390401	0.0456611	0.436062
R-HSA-5576890	Phase 3 - rapid repolarisation	-0.355923	0.0800175	0.435941
R-HSA-433137	Sodium-coupled sulphate, di- and tri-carboxylate transporters	-0.060152	0.375617	0.435769
R-HSA-193639	p75NTR signals via NF-kB	-0.334111	0.101028	0.435139
R-HSA-2046104	alpha-linolenic (omega3) and linoleic (omega6) acid metabolism	-0.1123	0.322548	0.434847
R-HSA-2046106	alpha-linolenic acid (ALA) metabolism	-0.1123	0.322548	0.434847
R-HSA-3232118	SUMOylation of transcription factors	-0.339228	0.0955469	0.434775
R-HSA-111459	Activation of caspases through apoptosome-mediated cleavage	-0.349644	0.0848011	0.434446
R-HSA-1660516	Synthesis of PIPs at the early endosome membrane	-0.300659	0.133519	0.434178
R-HSA-8939236	RUNX1 regulates transcription of genes involved in differentiation of HSCs	-0.281085	0.152786	0.433871
R-HSA-6804759	Regulation of TP53 Activity through Association with Co-factors	-0.314328	0.119505	0.433833
R-HSA-2168880	Scavenging of heme from plasma	-0.1159	0.317784	0.433684
R-HSA-189483	Heme degradation	-0.333005	0.100653	0.433658
R-HSA-380615	Serotonin clearance from the synaptic cleft	0.0784364	0.511634	0.433198
R-HSA-5099900	WNT5A-dependent internalization of FZD4	-0.319117	0.113931	0.433048
R-HSA-8866654	E3 ubiquitin ligases ubiquitinate target proteins	-0.309245	0.12338	0.432625
R-HSA-8866652	Synthesis of active ubiquitin: roles of E1 and E2 enzymes	-0.324912	0.107545	0.432456
R-HSA-9014325	TICAM1,TRAF6-dependent induction of TAK1 complex	-0.305411	0.126693	0.432105
R-HSA-8941855	RUNX3 regulates CDKN1A transcription	-0.331216	0.100825	0.432041
R-HSA-5696400	Dual Incision in GG-NER	-0.322557	0.109181	0.431738
R-HSA-6804116	TP53 Regulates Transcription of Genes Involved in G1 Cell Cycle Arrest	-0.331251	0.100316	0.431568
R-HSA-202040	G-protein activation	-0.157924	0.273552	0.431476
R-HSA-8985947	Interleukin-9 signaling	-0.353791	0.0775047	0.431296
R-HSA-5693571	Nonhomologous End-Joining (NHEJ)	-0.303764	0.127514	0.431278
R-HSA-9634597	GPER1 signaling	-0.319959	0.110844	0.430804
R-HSA-8979227	Triglyceride metabolism	-0.3192	0.111034	0.430234
R-HSA-77387	Insulin receptor recycling	-0.267119	0.162743	0.429861
R-HSA-190840	Microtubule-dependent trafficking of connexons from Golgi to the plasma membrane	-0.231227	0.19855	0.429777
R-HSA-5663213	RHO GTPases Activate WASPs and WAVEs	-0.333217	0.0961626	0.429379
R-HSA-156581	Methylation	-0.291562	0.137399	0.428961
R-HSA-209543	p75NTR recruits signalling complexes	-0.314819	0.113333	0.428152
R-HSA-173736	Alternative complement activation	-0.0322236	0.395492	0.427716
R-HSA-69563	p53-Dependent G1 DNA Damage Response	-0.29816	0.129552	0.427712
R-HSA-69580	p53-Dependent G1/S DNA damage checkpoint	-0.29816	0.129552	0.427712
R-HSA-434316	Fatty Acids bound to GPR40 (FFAR1) regulate insulin secretion	-0.134706	0.292675	0.427382
R-HSA-5626467	RHO GTPases activate IQGAPs	-0.291764	0.13526	0.427024
R-HSA-9793380	Formation of paraxial mesoderm	-0.276087	0.150758	0.426845
R-HSA-69615	G1/S DNA Damage Checkpoints	-0.294037	0.132799	0.426836
R-HSA-446353	Cell-extracellular matrix interactions	-0.292313	0.134515	0.426828
R-HSA-4086398	Ca2+ pathway	-0.327706	0.0986184	0.426324
R-HSA-9707616	Heme signaling	-0.318885	0.107404	0.426289
R-HSA-349425	Autodegradation of the E3 ubiquitin ligase COP1	-0.295367	0.130901	0.426268
R-HSA-2132295	MHC class II antigen presentation	-0.32051	0.105737	0.426247
R-HSA-399956	CRMPs in Sema3A signaling	-0.299523	0.12663	0.426153
R-HSA-964827	Progressive trimming of alpha-1,2-linked mannose residues from Man9/8/7GlcNAc2 to produce Man5GlcNAc2	-0.41435	0.0108976	0.425247
R-HSA-9818027	NFE2L2 regulating anti-oxidant/detoxification enzymes	-0.347549	0.0773515	0.4249
R-HSA-5625900	RHO GTPases activate CIT	-0.309774	0.114781	0.424555
R-HSA-9823739	Formation of the anterior neural plate	-0.308664	0.115809	0.424473
R-HSA-6796648	TP53 Regulates Transcription of DNA Repair Genes	-0.29525	0.129075	0.424325
R-HSA-2559582	Senescence-Associated Secretory Phenotype (SASP)	-0.309702	0.114566	0.424268
R-HSA-1169408	ISG15 antiviral mechanism	-0.339322	0.0846214	0.423944
R-HSA-9026766	Biosynthesis of protectin and resolvin conjugates in tissue regeneration (PCTR and RCTR)	-0.352119	0.071794	0.423913
R-HSA-8877627	Vitamin E transport	-0.161936	0.261859	0.423796
R-HSA-9645135	STAT5 Activation	-0.256261	0.167385	0.423646
R-HSA-912446	Meiotic recombination	-0.24437	0.179245	0.423615
R-HSA-2022857	Keratan sulfate degradation	-0.234672	0.188909	0.423581
R-HSA-9690406	Transcriptional regulation of testis differentiation	-0.22286	0.200558	0.423418
R-HSA-419812	Calcitonin-like ligand receptors	-0.0639573	0.359416	0.423374
R-HSA-448706	Interleukin-1 processing	-0.422414	0.000882683	0.423296
R-HSA-8949613	Cristae formation	-0.221291	0.201973	0.423264
R-HSA-111463	SMAC (DIABLO) binds to IAPs	-0.32192	0.100901	0.422821
R-HSA-111464	SMAC(DIABLO)-mediated dissociation of IAP:caspase complexes	-0.32192	0.100901	0.422821
R-HSA-77310	Beta oxidation of lauroyl-CoA to decanoyl-CoA-CoA	-0.430876	-0.00810204	0.422774
R-HSA-3270619	IRF3-mediated induction of type I IFN	-0.363779	0.0583104	0.422089
R-HSA-187024	NGF-independant TRKA activation	-0.114501	0.307375	0.421876
R-HSA-3134975	Regulation of innate immune responses to cytosolic DNA	-0.335477	0.0861118	0.421589
R-HSA-8964616	G beta:gamma signalling through CDC42	-0.257159	0.164096	0.421254
R-HSA-975634	Retinoid metabolism and transport	-0.189003	0.232012	0.421015
R-HSA-163358	PKA-mediated phosphorylation of key metabolic factors	-0.310238	0.110456	0.420693
R-HSA-174403	Glutathione synthesis and recycling	-0.11206	0.308541	0.420602
R-HSA-9018679	Biosynthesis of EPA-derived SPMs	-0.300315	0.120217	0.420531
R-HSA-5627117	RHO GTPases Activate ROCKs	-0.333896	0.0865331	0.420429
R-HSA-1237112	Methionine salvage pathway	-0.186197	0.234013	0.420211
R-HSA-71384	Ethanol oxidation	-0.0454883	0.3744	0.419888
R-HSA-9033658	Blood group systems biosynthesis	-0.0651244	0.354737	0.419861
R-HSA-202131	Metabolism of nitric oxide: NOS3 activation and regulation	-0.301762	0.11694	0.418702
R-HSA-6799198	Complex I biogenesis	-0.262361	0.15591	0.418271
R-HSA-420029	Tight junction interactions	-0.198472	0.219792	0.418264
R-HSA-420597	Nectin/Necl trans heterodimerization	-0.136516	0.28105	0.417566
R-HSA-9759218	Cobalamin (Cbl) metabolism	-0.258745	0.158804	0.417549
R-HSA-4755510	SUMOylation of immune response proteins	-0.386466	0.0305513	0.417017
R-HSA-5607761	Dectin-1 mediated noncanonical NF-kB signaling	-0.307093	0.109382	0.416476
R-HSA-9634638	Estrogen-dependent nuclear events downstream of ESR-membrane signaling	-0.339848	0.0765456	0.416394
R-HSA-354194	GRB2:SOS provides linkage to MAPK signaling for Integrins	-0.381848	0.0344401	0.416288
R-HSA-9706369	Negative regulation of FLT3	-0.315132	0.101097	0.41623
R-HSA-112411	MAPK1 (ERK2) activation	-0.313563	0.102488	0.416051
R-HSA-9022699	MECP2 regulates neuronal receptors and channels	-0.331781	0.0840562	0.415837
R-HSA-110314	Recognition of DNA damage by PCNA-containing replication complex	-0.342803	0.0730198	0.415822
R-HSA-9020958	Interleukin-21 signaling	-0.351104	0.064617	0.415721
R-HSA-5621575	CD209 (DC-SIGN) signaling	-0.386954	0.0287621	0.415716
R-HSA-427652	Sodium-coupled phosphate cotransporters	-0.303225	0.112413	0.415638
R-HSA-1296041	Activation of G protein gated Potassium channels	-0.207461	0.208098	0.415559
R-HSA-1296059	G protein gated Potassium channels	-0.207461	0.208098	0.415559
R-HSA-997272	Inhibition of voltage gated Ca2+ channels via Gbeta/gamma subunits	-0.207461	0.208098	0.415559
R-HSA-9033500	TYSND1 cleaves peroxisomal proteins	-0.341797	0.0736578	0.415454
R-HSA-71288	Creatine metabolism	-0.0890822	0.326362	0.415444
R-HSA-77350	Beta oxidation of hexanoyl-CoA to butanoyl-CoA	-0.483219	-0.0678044	0.415414
R-HSA-5205647	Mitophagy	-0.312765	0.102055	0.414819
R-HSA-162710	Synthesis of glycosylphosphatidylinositol (GPI)	-0.231468	0.182985	0.414453
R-HSA-9632974	NR1H2 & NR1H3 regulate gene expression linked to gluconeogenesis	-0.231491	0.181891	0.413382
R-HSA-9839373	Signaling by TGFBR3	-0.324515	0.0888059	0.413321
R-HSA-8948747	Regulation of PTEN localization	-0.303305	0.109545	0.412851
R-HSA-975110	TRAF6 mediated IRF7 activation in TLR7/8 or 9 signaling	-0.310889	0.101864	0.412753
R-HSA-937042	IRAK2 mediated activation of TAK1 complex	-0.305594	0.107099	0.412693
R-HSA-5654228	Phospholipase C-mediated cascade; FGFR4	-0.170825	0.241576	0.412401
R-HSA-2029481	FCGR activation	-0.323357	0.0888767	0.412234
R-HSA-5576893	Phase 2 - plateau phase	0.0402442	0.452426	0.412182
R-HSA-8852135	Protein ubiquitination	-0.308562	0.102357	0.410919
R-HSA-9725554	Differentiation of Keratinocytes in Interfollicular Epidermis in Mammalian Skin	-0.288144	0.122603	0.410746
R-HSA-5423646	Aflatoxin activation and detoxification	-0.278321	0.131568	0.409889
R-HSA-2025928	Calcineurin activates NFAT	-0.369805	0.0392863	0.409091
R-HSA-9013408	RHOG GTPase cycle	-0.298682	0.110245	0.408928
R-HSA-9758890	Transport of RCbl within the body	-0.227618	0.181228	0.408846
R-HSA-446205	Synthesis of GDP-mannose	-0.45752	-0.0487956	0.408724
R-HSA-6803207	TP53 Regulates Transcription of Caspase Activators and Caspases	-0.275626	0.132644	0.40827
R-HSA-170822	Regulation of Glucokinase by Glucokinase Regulatory Protein	-0.292876	0.114462	0.407339
R-HSA-6809371	Formation of the cornified envelope	-0.256899	0.150173	0.407072
R-HSA-73980	RNA Polymerase III Transcription Termination	-0.261131	0.145934	0.407065
R-HSA-8955332	Carboxyterminal post-translational modifications of tubulin	-0.163093	0.242748	0.40584
R-HSA-1296053	Classical Kir channels	0.0857969	0.491622	0.405825
R-HSA-1834949	Cytosolic sensors of pathogen-associated DNA	-0.33358	0.072215	0.405795
R-HSA-9758919	Epithelial-Mesenchymal Transition (EMT) during gastrulation	-0.255884	0.149174	0.405057
R-HSA-9860927	Turbulent (oscillatory, disturbed) flow shear stress activates signaling by PIEZO1 and integrins in endothelial cells	-0.349037	0.0557945	0.404831
R-HSA-5676590	NIK-->noncanonical NF-kB signaling	-0.286997	0.117664	0.40466
R-HSA-9012546	Interleukin-18 signaling	-0.318252	0.0862617	0.404513
R-HSA-111469	SMAC, XIAP-regulated apoptotic response	-0.303857	0.100653	0.404509
R-HSA-8951671	RUNX3 regulates YAP1-mediated transcription	-0.170173	0.234173	0.404345
R-HSA-5696397	Gap-filling DNA repair synthesis and ligation in GG-NER	-0.328528	0.0756363	0.404164
R-HSA-6806942	MET Receptor Activation	-0.239195	0.164224	0.40342
R-HSA-8956321	Nucleotide salvage	-0.295411	0.107905	0.403316
R-HSA-5578768	Physiological factors	-0.322257	0.0809228	0.403179
R-HSA-5696395	Formation of Incision Complex in GG-NER	-0.31396	0.0884223	0.402382
R-HSA-1660514	Synthesis of PIPs at the Golgi membrane	-0.313373	0.0889429	0.402316
R-HSA-1971475	A tetrasaccharide linker sequence is required for GAG synthesis	-0.166305	0.235653	0.401959
R-HSA-2980767	Activation of NIMA Kinases NEK9, NEK6, NEK7	-0.290624	0.111134	0.401758
R-HSA-196807	Nicotinate metabolism	-0.311999	0.0897378	0.401737
R-HSA-5696399	Global Genome Nucleotide Excision Repair (GG-NER)	-0.302595	0.0989768	0.401572
R-HSA-392518	Signal amplification	-0.31712	0.0842867	0.401406
R-HSA-210990	PECAM1 interactions	-0.274079	0.127178	0.401258
R-HSA-373755	Semaphorin interactions	-0.294787	0.106259	0.401046
R-HSA-6788467	IL-6-type cytokine receptor ligand interactions	-0.05906	0.341874	0.400934
R-HSA-193368	Synthesis of bile acids and bile salts via 7alpha-hydroxycholesterol	-0.24375	0.156903	0.400653
R-HSA-211728	Regulation of PAK-2p34 activity by PS-GAP/RHG10	-0.405338	-0.00476876	0.400569
R-HSA-2187335	The retinoid cycle in cones (daylight vision)	-0.0174553	0.382753	0.400208
R-HSA-977444	GABA B receptor activation	-0.156911	0.242874	0.399785
R-HSA-991365	Activation of GABAB receptors	-0.156911	0.242874	0.399785
R-HSA-451326	Activation of kainate receptors upon glutamate binding	-0.165513	0.234178	0.399691
R-HSA-110320	Translesion Synthesis by POLH	-0.309773	0.0898108	0.399584
R-HSA-1433559	Regulation of KIT signaling	-0.315378	0.0841225	0.399501
R-HSA-1266695	Interleukin-7 signaling	-0.334398	0.0647241	0.399122
R-HSA-8964043	Plasma lipoprotein clearance	-0.26993	0.128339	0.398269
R-HSA-15869	Metabolism of nucleotides	-0.305684	0.0925429	0.398227
R-HSA-6811436	COPI-independent Golgi-to-ER retrograde traffic	-0.326163	0.071944	0.398107
R-HSA-622323	Presynaptic nicotinic acetylcholine receptors	-0.184695	0.213343	0.398038
R-HSA-8940973	RUNX2 regulates osteoblast differentiation	-0.325267	0.0727357	0.398002
R-HSA-9734767	Developmental Cell Lineages	-0.222794	0.175072	0.397867
R-HSA-425986	Sodium/Proton exchangers	0.0455216	0.442976	0.397455
R-HSA-432040	Vasopressin regulates renal water homeostasis via Aquaporins	-0.199105	0.198027	0.397132
R-HSA-421270	Cell-cell junction organization	-0.246398	0.150325	0.396723
R-HSA-933542	TRAF6 mediated NF-kB activation	-0.297726	0.0988188	0.396545
R-HSA-9825895	Regulation of MITF-M-dependent genes involved in DNA replication, damage repair and senescence	-0.236977	0.15951	0.396487
R-HSA-9027276	Erythropoietin activates Phosphoinositide-3-kinase (PI3K)	-0.247988	0.148255	0.396243
R-HSA-937039	IRAK1 recruits IKK complex	-0.321807	0.0736643	0.395471
R-HSA-975144	IRAK1 recruits IKK complex upon TLR7/8 or 9 stimulation	-0.321807	0.0736643	0.395471
R-HSA-2586552	Signaling by Leptin	-0.29097	0.104224	0.395194
R-HSA-5662702	Melanin biosynthesis	-0.124875	0.270035	0.394909
R-HSA-5658442	Regulation of RAS by GAPs	-0.276205	0.118421	0.394627
R-HSA-5624138	Trafficking of myristoylated proteins to the cilium	-0.343977	0.0504501	0.394427
R-HSA-9603381	Activated NTRK3 signals through PI3K	-0.304741	0.08968	0.394421
R-HSA-3899300	SUMOylation of transcription cofactors	-0.303882	0.0905084	0.39439
R-HSA-391906	Leukotriene receptors	0.203847	0.598212	0.394365
R-HSA-2142691	Synthesis of Leukotrienes (LT) and Eoxins (EX)	-0.228464	0.165493	0.393957
R-HSA-9024446	NR1H2 and NR1H3-mediated signaling	-0.286359	0.107506	0.393865
R-HSA-1474228	Degradation of the extracellular matrix	-0.23441	0.159041	0.39345
R-HSA-70370	Galactose catabolism	-0.513115	-0.119727	0.393388
R-HSA-159782	Removal of aminoterminal propeptides from gamma-carboxylated proteins	-0.041936	0.351252	0.393188
R-HSA-75157	FasL/ CD95L signaling	-0.419595	-0.0265398	0.393055
R-HSA-5654738	Signaling by FGFR2	-0.298614	0.0942905	0.392905
R-HSA-917937	Iron uptake and transport	-0.290382	0.10241	0.392792
R-HSA-4641263	Regulation of FZD by ubiquitination	-0.288009	0.104692	0.392701
R-HSA-174824	Plasma lipoprotein assembly, remodeling, and clearance	-0.291697	0.100805	0.392502
R-HSA-6782861	Synthesis of wybutosine at G37 of tRNA(Phe)	-0.120017	0.272022	0.392039
R-HSA-9648002	RAS processing	-0.279343	0.112424	0.391768
R-HSA-2173782	Binding and Uptake of Ligands by Scavenger Receptors	-0.261636	0.12971	0.391346
R-HSA-2428933	SHC-related events triggered by IGF1R	-0.373701	0.0175591	0.39126
R-HSA-8963889	Assembly of active LPL and LIPC lipase complexes	-0.310632	0.0804757	0.391108
R-HSA-917977	Transferrin endocytosis and recycling	-0.218104	0.172688	0.390792
R-HSA-446728	Cell junction organization	-0.259897	0.130484	0.39038
R-HSA-9854907	Regulation of MITF-M dependent genes involved in metabolism	-0.162176	0.228139	0.390315
R-HSA-2892247	POU5F1 (OCT4), SOX2, NANOG activate genes related to proliferation	-0.322977	0.0670915	0.390069
R-HSA-72200	mRNA Editing: C to U Conversion	-0.195331	0.194259	0.38959
R-HSA-75094	Formation of the Editosome	-0.195331	0.194259	0.38959
R-HSA-209968	Thyroxine biosynthesis	0.191872	0.581441	0.389569
R-HSA-174417	Telomere C-strand (Lagging Strand) Synthesis	-0.299761	0.0896914	0.389452
R-HSA-174154	APC/C:Cdc20 mediated degradation of Securin	-0.258327	0.13087	0.389197
R-HSA-8951936	RUNX3 regulates p14-ARF	-0.335851	0.0530328	0.388884
R-HSA-6811555	PI5P Regulates TP53 Acetylation	-0.307545	0.0812399	0.388785
R-HSA-418990	Adherens junctions interactions	-0.268084	0.120313	0.388397
R-HSA-9664873	Pexophagy	-0.290291	0.0975843	0.387875
R-HSA-879518	Transport of organic anions	-0.0674149	0.319509	0.386923
R-HSA-9027284	Erythropoietin activates RAS	-0.288888	0.0979808	0.386868
R-HSA-437239	Recycling pathway of L1	-0.303732	0.0830626	0.386794
R-HSA-983712	Ion channel transport	-0.261594	0.125065	0.386659
R-HSA-5140745	WNT5A-dependent internalization of FZD2, FZD5 and ROR2	-0.265428	0.121229	0.386657
R-HSA-9619665	EGR2 and SOX10-mediated initiation of Schwann cell myelination	-0.247248	0.139372	0.38662
R-HSA-3928665	EPH-ephrin mediated repulsion of cells	-0.284106	0.102508	0.386614
R-HSA-1296065	Inwardly rectifying K+ channels	-0.164784	0.22167	0.386454
R-HSA-73893	DNA Damage Bypass	-0.337056	0.0485231	0.385579
R-HSA-937072	TRAF6-mediated induction of TAK1 complex within TLR4 complex	-0.301654	0.0838529	0.385507
R-HSA-975163	IRAK2 mediated activation of TAK1 complex upon TLR7/8 or 9 stimulation	-0.301654	0.0838529	0.385507
R-HSA-9833576	CDH11 homotypic and heterotypic interactions	-0.308517	0.0769545	0.385471
R-HSA-727802	Transport of nucleotide sugars	-0.259116	0.126242	0.385358
R-HSA-163359	Glucagon signaling in metabolic regulation	-0.273851	0.11148	0.385331
R-HSA-69601	Ubiquitin Mediated Degradation of Phosphorylated Cdc25A	-0.253316	0.131856	0.385172
R-HSA-69610	p53-Independent DNA Damage Response	-0.253316	0.131856	0.385172
R-HSA-69613	p53-Independent G1/S DNA damage checkpoint	-0.253316	0.131856	0.385172
R-HSA-5601884	PIWI-interacting RNA (piRNA) biogenesis	-0.273026	0.112086	0.385112
R-HSA-2022854	Keratan sulfate biosynthesis	-0.0967754	0.288244	0.38502
R-HSA-428643	Organic anion transporters	-0.0865088	0.298272	0.384781
R-HSA-6804757	Regulation of TP53 Degradation	-0.304344	0.0801361	0.38448
R-HSA-418597	G alpha (z) signalling events	-0.268099	0.116194	0.384293
R-HSA-8984722	Interleukin-35 Signalling	-0.279358	0.10479	0.384148
R-HSA-174184	Cdc20:Phospho-APC/C mediated degradation of Cyclin A	-0.269422	0.114508	0.38393
R-HSA-5620924	Intraflagellar transport	-0.275967	0.107098	0.383065
R-HSA-5651801	PCNA-Dependent Long Patch Base Excision Repair	-0.328944	0.0535488	0.382493
R-HSA-159854	Gamma-carboxylation, transport, and amino-terminal cleavage of proteins	-0.043331	0.338967	0.382298
R-HSA-6783783	Interleukin-10 signaling	-0.214999	0.167108	0.382107
R-HSA-9839389	TGFBR3 regulates TGF-beta signaling	-0.259315	0.122765	0.38208
R-HSA-9609523	Insertion of tail-anchored proteins into the endoplasmic reticulum membrane	-0.279933	0.102056	0.381988
R-HSA-8866904	Negative regulation of activity of TFAP2 (AP-2) family transcription factors	-0.28566	0.0962795	0.381939
R-HSA-389960	Formation of tubulin folding intermediates by CCT/TriC	-0.252155	0.129696	0.381851
R-HSA-211916	Vitamins	0.30586	0.687268	0.381408
R-HSA-6806003	Regulation of TP53 Expression and Degradation	-0.301333	0.079592	0.380925
R-HSA-9014826	Interleukin-36 pathway	-0.234252	0.1465	0.380751
R-HSA-844456	The NLRP3 inflammasome	-0.324149	0.0565666	0.380715
R-HSA-74158	RNA Polymerase III Transcription	-0.268777	0.111902	0.380679
R-HSA-749476	RNA Polymerase III Abortive And Retractive Initiation	-0.268777	0.111902	0.380679
R-HSA-190242	FGFR1 ligand binding and activation	-0.287459	0.0929884	0.380448
R-HSA-9615933	Postmitotic nuclear pore complex (NPC) reformation	-0.325806	0.0544415	0.380247
R-HSA-9033241	Peroxisomal protein import	-0.253906	0.126203	0.380109
R-HSA-179419	APC:Cdc20 mediated degradation of cell cycle proteins prior to satisfation of the cell cycle checkpoint	-0.263948	0.115689	0.379637
R-HSA-3134973	LRR FLII-interacting protein 1 (LRRFIP1) activates type I IFN production	-0.335556	0.0440786	0.379634
R-HSA-9734091	Drug-mediated inhibition of MET activation	-0.325048	0.0545555	0.379603
R-HSA-70326	Glucose metabolism	-0.289313	0.0901779	0.379491
R-HSA-9748787	Azathioprine ADME	-0.270237	0.108837	0.379074
R-HSA-76009	Platelet Aggregation (Plug Formation)	-0.321594	0.0573846	0.378979
R-HSA-193697	p75NTR regulates axonogenesis	-0.240361	0.138616	0.378977
R-HSA-6806667	Metabolism of fat-soluble vitamins	-0.193115	0.185794	0.378908
R-HSA-110373	Resolution of AP sites via the multiple-nucleotide patch replacement pathway	-0.325925	0.0525952	0.37852
R-HSA-8983432	Interleukin-15 signaling	-0.303082	0.0751214	0.378204
R-HSA-73863	RNA Polymerase I Transcription Termination	-0.284799	0.0932691	0.378068
R-HSA-9020956	Interleukin-27 signaling	-0.281711	0.0962279	0.377939
R-HSA-112313	Neurotransmitter uptake and metabolism In glial cells	0.031962	0.409041	0.377079
R-HSA-210455	Astrocytic Glutamate-Glutamine Uptake And Metabolism	0.031962	0.409041	0.377079
R-HSA-9842860	Regulation of endogenous retroelements	-0.224662	0.152263	0.376925
R-HSA-5684264	MAP3K8 (TPL2)-dependent MAPK1/3 activation	-0.317187	0.0595275	0.376714
R-HSA-9830369	Kidney development	-0.161417	0.215177	0.376594
R-HSA-381676	Glucagon-like Peptide-1 (GLP1) regulates insulin secretion	-0.265895	0.110652	0.376547
R-HSA-6805567	Keratinization	-0.196799	0.179634	0.376433
R-HSA-159763	Transport of gamma-carboxylated protein precursors from the endoplasmic reticulum to the Golgi apparatus	-0.0216265	0.35451	0.376136
R-HSA-176409	APC/C:Cdc20 mediated degradation of mitotic proteins	-0.262971	0.113139	0.37611
R-HSA-5689877	Josephin domain DUBs	-0.298681	0.0773876	0.376069
R-HSA-70171	Glycolysis	-0.295351	0.0807163	0.376068
R-HSA-69091	Polymerase switching	-0.329649	0.0462079	0.375857
R-HSA-69109	Leading Strand Synthesis	-0.329649	0.0462079	0.375857
R-HSA-9615017	FOXO-mediated transcription of oxidative stress, metabolic and neuronal genes	-0.289085	0.086526	0.375611
R-HSA-416550	Sema4D mediated inhibition of cell attachment and migration	-0.352763	0.0228114	0.375574
R-HSA-5205685	PINK1-PRKN Mediated Mitophagy	-0.287287	0.088206	0.375493
R-HSA-5693607	Processing of DNA double-strand break ends	-0.278299	0.0969191	0.375219
R-HSA-622312	Inflammasomes	-0.327563	0.0475558	0.375119
R-HSA-399954	Sema3A PAK dependent Axon repulsion	-0.289317	0.0856843	0.375001
R-HSA-389356	Co-stimulation by CD28	-0.318612	0.0561425	0.374754
R-HSA-8941326	RUNX2 regulates bone development	-0.304163	0.0705449	0.374708
R-HSA-73933	Resolution of Abasic Sites (AP sites)	-0.29491	0.0797579	0.374668
R-HSA-4641258	Degradation of DVL	-0.263681	0.110821	0.374501
R-HSA-912526	Interleukin receptor SHC signaling	-0.214649	0.159766	0.374415
R-HSA-140179	Amine Oxidase reactions	0.11266	0.48707	0.374409
R-HSA-2022928	HS-GAG biosynthesis	-0.163541	0.210576	0.374117
R-HSA-9764302	Regulation of CDH19 Expression and Function	-0.244728	0.129162	0.37389
R-HSA-8865999	MET activates PTPN11	-0.241609	0.131745	0.373353
R-HSA-165159	MTOR signalling	-0.309049	0.0641137	0.373162
R-HSA-73621	Pyrimidine catabolism	-0.0976548	0.275413	0.373067
R-HSA-9839394	TGFBR3 expression	-0.349462	0.0232057	0.372668
R-HSA-9013409	RHOJ GTPase cycle	-0.269536	0.103051	0.372586
R-HSA-1482925	Acyl chain remodelling of PG	-0.0334443	0.339114	0.372559
R-HSA-416482	G alpha (12/13) signalling events	-0.249232	0.122983	0.372215
R-HSA-110313	Translesion synthesis by Y family DNA polymerases bypasses lesions on DNA template	-0.329679	0.0425305	0.37221
R-HSA-381340	Transcriptional regulation of white adipocyte differentiation	-0.308586	0.063375	0.371961
R-HSA-69618	Mitotic Spindle Checkpoint	-0.284115	0.0871019	0.371217
R-HSA-9856530	High laminar flow shear stress activates signaling by PIEZO1 and PECAM1:CDH5:KDR in endothelial cells	-0.297265	0.0733548	0.37062
R-HSA-9705462	Inactivation of CSF3 (G-CSF) signaling	-0.307424	0.0625542	0.369978
R-HSA-877312	Regulation of IFNG signaling	-0.251323	0.118271	0.369594
R-HSA-8952158	RUNX3 regulates BCL2L11 (BIM) transcription	-0.34371	0.0256728	0.369383
R-HSA-5576886	Phase 4 - resting membrane potential	-0.0812325	0.288051	0.369283
R-HSA-1500620	Meiosis	-0.224929	0.144131	0.369061
R-HSA-9859138	BCKDH synthesizes BCAA-CoA from KIC, KMVA, KIV	-0.113968	0.254853	0.368821
R-HSA-9843940	Regulation of endogenous retroelements by KRAB-ZFP proteins	-0.208668	0.159999	0.368667
R-HSA-1296052	Ca2+ activated K+ channels	0.137999	0.506491	0.368493
R-HSA-450321	JNK (c-Jun kinases) phosphorylation and activation mediated by activated human TAK1	-0.326132	0.0422069	0.368339
R-HSA-8866427	VLDLR internalisation and degradation	-0.287748	0.0802993	0.368047
R-HSA-1236978	Cross-presentation of soluble exogenous antigens (endosomes)	-0.240795	0.126996	0.367791
R-HSA-112409	RAF-independent MAPK1/3 activation	-0.280728	0.0863285	0.367056
R-HSA-445355	Smooth Muscle Contraction	-0.265354	0.101447	0.366801
R-HSA-8953750	Transcriptional Regulation by E2F6	-0.28039	0.0863847	0.366774
R-HSA-1234176	Oxygen-dependent proline hydroxylation of Hypoxia-inducible Factor Alpha	-0.24761	0.118886	0.366496
R-HSA-354192	Integrin signaling	-0.326554	0.0395785	0.366133
R-HSA-75153	Apoptotic execution phase	-0.287763	0.0781917	0.365955
R-HSA-5633008	TP53 Regulates Transcription of Cell Death Genes	-0.262372	0.103105	0.365477
R-HSA-174084	Autodegradation of Cdh1 by Cdh1:APC/C	-0.247337	0.118124	0.36546
R-HSA-2142688	Synthesis of 5-eicosatetraenoic acids	-0.283367	0.0817253	0.365093
R-HSA-9909505	Modulation of host responses by IFN-stimulated genes	-0.308837	0.0562435	0.36508
R-HSA-9911233	Expression of NOTCH2NL genes	-0.108566	0.256416	0.364982
R-HSA-76061	RNA Polymerase III Transcription Initiation From Type 1 Promoter	-0.277847	0.08657	0.364417
R-HSA-193634	Axonal growth inhibition (RHOA activation)	-0.25806	0.105889	0.363948
R-HSA-164378	PKA activation in glucagon signalling	-0.257519	0.106317	0.363836
R-HSA-9013423	RAC3 GTPase cycle	-0.259518	0.10419	0.363707
R-HSA-168927	TICAM1, RIP1-mediated IKK complex recruitment	-0.299951	0.0636851	0.363636
R-HSA-159740	Gamma-carboxylation of protein precursors	-0.0229439	0.340671	0.363615
R-HSA-9007892	Interleukin-38 signaling	-0.0748572	0.287917	0.362774
R-HSA-69166	Removal of the Flap Intermediate	-0.275536	0.0870703	0.362606
R-HSA-74749	Signal attenuation	-0.297609	0.0649201	0.36253
R-HSA-9013148	CDC42 GTPase cycle	-0.267226	0.0951843	0.36241
R-HSA-446388	Regulation of cytoskeletal remodeling and cell spreading by IPP complex components	-0.297636	0.0646772	0.362313
R-HSA-1234174	Cellular response to hypoxia	-0.254591	0.10768	0.36227
R-HSA-4419969	Depolymerization of the Nuclear Lamina	-0.301107	0.0609498	0.362057
R-HSA-4641257	Degradation of AXIN	-0.253527	0.108476	0.362004
R-HSA-2197563	NOTCH2 intracellular domain regulates transcription	-0.37546	-0.0142426	0.361218
R-HSA-450408	AUF1 (hnRNP D0) binds and destabilizes mRNA	-0.25348	0.107478	0.360958
R-HSA-379398	Enzymatic degradation of Dopamine by monoamine oxidase	-0.198285	0.162672	0.360957
R-HSA-177504	Retrograde neurotrophin signalling	-0.303449	0.0572723	0.360721
R-HSA-73614	Pyrimidine salvage	-0.24224	0.11841	0.360651
R-HSA-3928662	EPHB-mediated forward signaling	-0.285119	0.0752221	0.360341
R-HSA-380972	Energy dependent regulation of mTOR by LKB1-AMPK	-0.257435	0.102651	0.360086
R-HSA-9034013	NTF3 activates NTRK3 signaling	0.113007	0.472951	0.359944
R-HSA-1295596	Spry regulation of FGF signaling	-0.290794	0.0690909	0.359885
R-HSA-156590	Glutathione conjugation	-0.165925	0.193754	0.359679
R-HSA-2995383	Initiation of Nuclear Envelope (NE) Reformation	-0.306228	0.053436	0.359665
R-HSA-1566948	Elastic fibre formation	-0.0655663	0.294037	0.359603
R-HSA-9757110	Prednisone ADME	0.120214	0.4798	0.359586
R-HSA-5690714	CD22 mediated BCR regulation	-0.274417	0.0849227	0.35934
R-HSA-3928663	EPHA-mediated growth cone collapse	-0.263882	0.0954163	0.359298
R-HSA-69183	Processive synthesis on the lagging strand	-0.275032	0.0842192	0.359251
R-HSA-1834941	STING mediated induction of host immune responses	-0.316717	0.0421401	0.358857
R-HSA-418592	ADP signalling through P2Y purinoceptor 1	-0.266394	0.0923697	0.358764
R-HSA-3249367	STAT6-mediated induction of chemokines	-0.391565	-0.0330901	0.358475
R-HSA-9634815	Transcriptional Regulation by NPAS4	-0.261145	0.09726	0.358405
R-HSA-351202	Metabolism of polyamines	-0.234791	0.12323	0.358021
R-HSA-9831926	Nephron development	-0.0323357	0.325399	0.357735
R-HSA-2500257	Resolution of Sister Chromatid Cohesion	-0.283718	0.0738772	0.357595
R-HSA-379397	Enzymatic degradation of dopamine by COMT	-0.197389	0.159823	0.357212
R-HSA-4655427	SUMOylation of DNA methylation proteins	-0.343657	0.0133079	0.356965
R-HSA-71262	Carnitine synthesis	-0.429842	-0.0732211	0.356621
R-HSA-1655829	Regulation of cholesterol biosynthesis by SREBP (SREBF)	-0.316195	0.0401776	0.356373
R-HSA-174178	APC/C:Cdh1 mediated degradation of Cdc20 and other APC/C:Cdh1 targeted proteins in late mitosis/early G1	-0.250024	0.106163	0.356186
R-HSA-71336	Pentose phosphate pathway	-0.308295	0.0476789	0.355974
R-HSA-141424	Amplification of signal from the kinetochores	-0.279135	0.0766668	0.355802
R-HSA-141444	Amplification of signal from unattached kinetochores via a MAD2 inhibitory signal	-0.279135	0.0766668	0.355802
R-HSA-9013404	RAC2 GTPase cycle	-0.252221	0.103567	0.355788
R-HSA-190370	FGFR1b ligand binding and activation	-0.194621	0.161147	0.355769
R-HSA-1169091	Activation of NF-kappaB in B cells	-0.284013	0.0716601	0.355673
R-HSA-525793	Myogenesis	-0.260086	0.0953617	0.355448
R-HSA-5627123	RHO GTPases activate PAKs	-0.277462	0.0779017	0.355363
R-HSA-975578	Reactions specific to the complex N-glycan synthesis pathway	-0.1511	0.204244	0.355344
R-HSA-76066	RNA Polymerase III Transcription Initiation From Type 2 Promoter	-0.273406	0.0814701	0.354876
R-HSA-350562	Regulation of ornithine decarboxylase (ODC)	-0.240264	0.114499	0.354763
R-HSA-9818564	Epigenetic regulation of gene expression by MLL3 and MLL4 complexes	-0.235517	0.119226	0.354742
R-HSA-9841922	MLL4 and MLL3 complexes regulate expression of PPARG target genes in adipogenesis and hepatic steatosis	-0.235517	0.119226	0.354742
R-HSA-9851695	Epigenetic regulation of adipogenesis genes by MLL3 and MLL4 complexes	-0.235517	0.119226	0.354742
R-HSA-9648025	EML4 and NUDC in mitotic spindle formation	-0.27671	0.0775245	0.354234
R-HSA-8852405	Signaling by MST1	-0.103762	0.250366	0.354129
R-HSA-77285	Beta oxidation of myristoyl-CoA to lauroyl-CoA	-0.348088	0.00596886	0.354056
R-HSA-1474290	Collagen formation	-0.174754	0.179079	0.353833
R-HSA-68952	DNA replication initiation	-0.385288	-0.0320103	0.353278
R-HSA-110312	Translesion synthesis by REV1	-0.317592	0.0353376	0.35293
R-HSA-6811440	Retrograde transport at the Trans-Golgi-Network	-0.295179	0.05731	0.352489
R-HSA-8985801	Regulation of cortical dendrite branching	-0.166956	0.184808	0.351764
R-HSA-419408	Lysosphingolipid and LPA receptors	-0.116601	0.234711	0.351312
R-HSA-5620922	BBSome-mediated cargo-targeting to cilium	-0.182014	0.169224	0.351239
R-HSA-3000170	Syndecan interactions	-0.204483	0.146408	0.35089
R-HSA-5654733	Negative regulation of FGFR4 signaling	-0.282843	0.0679778	0.350821
R-HSA-375281	Hormone ligand-binding receptors	0.0979967	0.447942	0.349945
R-HSA-9824272	Somitogenesis	-0.229881	0.119869	0.34975
R-HSA-2173791	TGF-beta receptor signaling in EMT (epithelial to mesenchymal transition)	-0.257225	0.0924866	0.349711
R-HSA-937041	IKK complex recruitment mediated by RIP1	-0.30027	0.0494324	0.349702
R-HSA-5654219	Phospholipase C-mediated cascade: FGFR1	-0.229194	0.120309	0.349502
R-HSA-174113	SCF-beta-TrCP mediated degradation of Emi1	-0.252433	0.097018	0.349451
R-HSA-2142845	Hyaluronan metabolism	-0.242333	0.106739	0.349072
R-HSA-5655862	Translesion synthesis by POLK	-0.319067	0.0299977	0.349065
R-HSA-5656121	Translesion synthesis by POLI	-0.314614	0.0344343	0.349049
R-HSA-5654732	Negative regulation of FGFR3 signaling	-0.282517	0.0658527	0.34837
R-HSA-9680350	Signaling by CSF1 (M-CSF) in myeloid cells	-0.269955	0.0781763	0.348131
R-HSA-71403	Citric acid cycle (TCA cycle)	-0.28189	0.0661698	0.348059
R-HSA-399997	Acetylcholine regulates insulin secretion	-0.247305	0.100748	0.348053
R-HSA-450282	MAPK targets/ Nuclear events mediated by MAP kinases	-0.325562	0.0222681	0.34783
R-HSA-1237044	Erythrocytes take up carbon dioxide and release oxygen	-0.0986148	0.248859	0.347474
R-HSA-1480926	O2/CO2 exchange in erythrocytes	-0.0986148	0.248859	0.347474
R-HSA-418360	Platelet calcium homeostasis	-0.248371	0.0989537	0.347325
R-HSA-201688	WNT mediated activation of DVL	-0.288827	0.0581438	0.346971
R-HSA-9762292	Regulation of CDH11 function	-0.286011	0.0609249	0.346936
R-HSA-9860931	Response of endothelial cells to shear stress	-0.302442	0.0442454	0.346688
R-HSA-111995	phospho-PLA2 pathway	-0.36884	-0.0224807	0.346359
R-HSA-5674135	MAP2K and MAPK activation	-0.302651	0.0436645	0.346315
R-HSA-5654221	Phospholipase C-mediated cascade; FGFR2	-0.226876	0.119347	0.346222
R-HSA-9762114	GSK3B and BTRC:CUL1-mediated-degradation of NFE2L2	-0.263019	0.0830802	0.346099
R-HSA-211733	Regulation of activated PAK-2p34 by proteasome mediated degradation	-0.254572	0.0915224	0.346095
R-HSA-75815	Ubiquitin-dependent degradation of Cyclin D	-0.263187	0.0819847	0.345172
R-HSA-189445	Metabolism of porphyrins	-0.203572	0.141405	0.344977
R-HSA-442720	CREB1 phosphorylation through the activation of Adenylate Cyclase	-0.281818	0.0631413	0.344959
R-HSA-9013106	RHOC GTPase cycle	-0.245542	0.0985046	0.344047
R-HSA-9830364	Formation of the nephric duct	-0.203155	0.140208	0.343362
R-HSA-373752	Netrin-1 signaling	-0.244602	0.0986755	0.343277
R-HSA-163615	PKA activation	-0.260072	0.0829455	0.343017
R-HSA-4641265	Repression of WNT target genes	-0.260342	0.0825238	0.342866
R-HSA-9634600	Regulation of glycolysis by fructose 2,6-bisphosphate metabolism	-0.308875	0.0336676	0.342543
R-HSA-1482801	Acyl chain remodelling of PS	0.0178738	0.360398	0.342524
R-HSA-1474165	Reproduction	-0.216268	0.126181	0.342449
R-HSA-110056	MAPK3 (ERK1) activation	-0.226745	0.114411	0.341156
R-HSA-947581	Molybdenum cofactor biosynthesis	-0.0469311	0.293979	0.34091
R-HSA-198203	PI3K/AKT activation	-0.295811	0.0450803	0.340891
R-HSA-629587	Highly sodium permeable postsynaptic acetylcholine nicotinic receptors	-0.244797	0.0959252	0.340722
R-HSA-2408550	Metabolism of ingested H2SeO4 and H2SeO3 into H2Se	-0.334439	0.00625823	0.340697
R-HSA-9839397	TGFBR3 regulates FGF2 signaling	-0.239638	0.100892	0.340529
R-HSA-2024096	HS-GAG degradation	-0.226536	0.113943	0.340478
R-HSA-176814	Activation of APC/C and APC/C:Cdc20 mediated degradation of mitotic proteins	-0.244571	0.0955918	0.340163
R-HSA-69017	CDK-mediated phosphorylation and removal of Cdc6	-0.243561	0.0965269	0.340088
R-HSA-9667769	Acetylcholine inhibits contraction of outer hair cells	-0.406823	-0.0668098	0.340014
R-HSA-9855142	Cellular responses to mechanical stimuli	-0.297117	0.0427853	0.339902
R-HSA-73780	RNA Polymerase III Chain Elongation	-0.241135	0.0982919	0.339427
R-HSA-1592230	Mitochondrial biogenesis	-0.251132	0.0881657	0.339297
R-HSA-68884	Mitotic Telophase/Cytokinesis	-0.233509	0.105779	0.339287
R-HSA-2995410	Nuclear Envelope (NE) Reassembly	-0.308967	0.030099	0.339066
R-HSA-5654727	Negative regulation of FGFR2 signaling	-0.276032	0.0629775	0.33901
R-HSA-2980766	Nuclear Envelope Breakdown	-0.28706	0.051902	0.338961
R-HSA-2129379	Molecules associated with elastic fibres	-0.049878	0.289016	0.338894
R-HSA-5654726	Negative regulation of FGFR1 signaling	-0.275855	0.0630193	0.338875
R-HSA-1250347	SHC1 events in ERBB4 signaling	-0.282584	0.0560971	0.338681
R-HSA-9035034	RHOF GTPase cycle	-0.251639	0.0869721	0.338611
R-HSA-194068	Bile acid and bile salt metabolism	-0.211864	0.126584	0.338448
R-HSA-450341	Activation of the AP-1 family of transcription factors	-0.330176	0.0080311	0.338207
R-HSA-70921	Histidine catabolism	-0.181176	0.156896	0.338073
R-HSA-8868766	rRNA processing in the mitochondrion	-0.281179	0.0568888	0.338068
R-HSA-111471	Apoptotic factor-mediated response	-0.294767	0.0432542	0.338021
R-HSA-196757	Metabolism of folate and pterines	-0.343824	-0.00606023	0.337764
R-HSA-9696264	RND3 GTPase cycle	-0.225085	0.112491	0.337576
R-HSA-9034793	Activated NTRK3 signals through PLCG1	-0.0818044	0.25575	0.337555
R-HSA-8854050	FBXL7 down-regulates AURKA during mitotic entry and in early mitosis	-0.248232	0.0890176	0.337249
R-HSA-9825892	Regulation of MITF-M-dependent genes involved in cell cycle and proliferation	-0.264751	0.0724423	0.337193
R-HSA-8849471	PTK6 Regulates RHO GTPases, RAS GTPase and MAP kinases	-0.28662	0.0498693	0.336489
R-HSA-9607240	FLT3 Signaling	-0.296903	0.0395617	0.336464
R-HSA-181431	Acetylcholine binding and downstream events	-0.270135	0.0657763	0.335912
R-HSA-622327	Postsynaptic nicotinic acetylcholine receptors	-0.270135	0.0657763	0.335912
R-HSA-9758274	Regulation of NF-kappa B signaling	-0.27555	0.0599392	0.335489
R-HSA-5576892	Phase 0 - rapid depolarisation	-0.0510606	0.284259	0.33532
R-HSA-445717	Aquaporin-mediated transport	-0.182082	0.153098	0.33518
R-HSA-379401	Dopamine clearance from the synaptic cleft	-0.154944	0.180132	0.335076
R-HSA-1660517	Synthesis of PIPs at the late endosome membrane	-0.257832	0.0765424	0.334374
R-HSA-9927353	Co-inhibition by BTLA	-0.193096	0.14119	0.334286
R-HSA-5358346	Hedgehog ligand biogenesis	-0.242826	0.0913612	0.334187
R-HSA-372708	p130Cas linkage to MAPK signaling for integrins	-0.29934	0.0348357	0.334176
R-HSA-9674555	Signaling by CSF3 (G-CSF)	-0.285965	0.0477258	0.333691
R-HSA-169911	Regulation of Apoptosis	-0.247653	0.0859143	0.333568
R-HSA-9013149	RAC1 GTPase cycle	-0.244873	0.0886005	0.333474
R-HSA-196025	Formation of annular gap junctions	-0.252854	0.0796603	0.332514
R-HSA-2473224	Antagonism of Activin by Follistatin	-0.0368833	0.295109	0.331993
R-HSA-182971	EGFR downregulation	-0.248637	0.0824852	0.331122
R-HSA-190373	FGFR1c ligand binding and activation	-0.240114	0.090536	0.33065
R-HSA-8847453	Synthesis of PIPs in the nucleus	-0.39778	-0.0672953	0.330485
R-HSA-6787639	GDP-fucose biosynthesis	-0.252019	0.0783008	0.33032
R-HSA-70350	Fructose catabolism	-0.130244	0.199801	0.330045
R-HSA-918233	TRAF3-dependent IRF activation pathway	-0.351965	-0.0222307	0.329735
R-HSA-5632684	Hedgehog 'on' state	-0.224751	0.104835	0.329586
R-HSA-1461957	Beta defensins	-0.103389	0.225779	0.329168
R-HSA-442660	Na+/Cl- dependent neurotransmitter transporters	-0.139544	0.189498	0.329041
R-HSA-3000171	Non-integrin membrane-ECM interactions	-0.183332	0.145396	0.328728
R-HSA-170670	Adenylate cyclase inhibitory pathway	0.035431	0.3638	0.328369
R-HSA-187577	SCF(Skp2)-mediated degradation of p27/p21	-0.251094	0.0770341	0.328128
R-HSA-8877330	RUNX1 and FOXP3 control the development of regulatory T lymphocytes (Tregs)	-0.271437	0.055525	0.326963
R-HSA-112412	SOS-mediated signalling	-0.298271	0.028666	0.326937
R-HSA-9708530	Regulation of BACH1 activity	-0.255732	0.0707794	0.326512
R-HSA-450302	activated TAK1 mediates p38 MAPK activation	-0.31607	0.0100229	0.326093
R-HSA-1482883	Acyl chain remodeling of DAG and TAG	-0.218241	0.107731	0.325972
R-HSA-9010642	ROBO receptors bind AKAP5	-0.276354	0.0484027	0.324757
R-HSA-167044	Signalling to RAS	-0.284449	0.0400589	0.324508
R-HSA-193648	NRAGE signals death through JNK	-0.259014	0.0654831	0.324497
R-HSA-192105	Synthesis of bile acids and bile salts	-0.156944	0.167535	0.324479
R-HSA-912631	Regulation of signaling by CBL	-0.266493	0.0579417	0.324434
R-HSA-111931	PKA-mediated phosphorylation of CREB	-0.264344	0.0599102	0.324254
R-HSA-451927	Interleukin-2 family signaling	-0.245151	0.0785167	0.323667
R-HSA-77286	mitochondrial fatty acid beta-oxidation of saturated fatty acids	-0.377871	-0.0544444	0.323427
R-HSA-190873	Gap junction degradation	-0.251923	0.0713554	0.323278
R-HSA-9013026	RHOB GTPase cycle	-0.230197	0.0927494	0.322946
R-HSA-8939247	RUNX1 regulates transcription of genes involved in interleukin signaling	-0.444218	-0.121933	0.322286
R-HSA-2564830	Cytosolic iron-sulfur cluster assembly	-0.194723	0.127278	0.322
R-HSA-982772	Growth hormone receptor signaling	-0.295746	0.0258542	0.3216
R-HSA-450294	MAP kinase activation	-0.300404	0.0206692	0.321073
R-HSA-4608870	Asymmetric localization of PCP proteins	-0.221075	0.0996633	0.320739
R-HSA-912694	Regulation of IFNA/IFNB signaling	-0.170821	0.149866	0.320687
R-HSA-8875555	MET activates RAP1 and RAC1	-0.27317	0.0470945	0.320264
R-HSA-69052	Switching of origins to a post-replicative state	-0.234969	0.0844622	0.319431
R-HSA-2514859	Inactivation, recovery and regulation of the phototransduction cascade	-0.231928	0.0874351	0.319363
R-HSA-9796292	Formation of axial mesoderm	-0.1479	0.170976	0.318876
R-HSA-75876	Synthesis of very long-chain fatty acyl-CoAs	-0.251522	0.0672637	0.318785
R-HSA-5649702	APEX1-Independent Resolution of AP Sites via the Single Nucleotide Replacement Pathway	-0.233907	0.0845382	0.318445
R-HSA-9907900	Proteasome assembly	-0.19909	0.119331	0.318421
R-HSA-2029482	Regulation of actin dynamics for phagocytic cup formation	-0.263986	0.0539001	0.317886
R-HSA-975577	N-Glycan antennae elongation	-0.179996	0.137793	0.317789
R-HSA-76046	RNA Polymerase III Transcription Initiation	-0.253356	0.063961	0.317317
R-HSA-2514856	The phototransduction cascade	-0.228905	0.0877225	0.316628
R-HSA-5362517	Signaling by Retinoic Acid	-0.218198	0.09832	0.316518
R-HSA-429958	mRNA decay by 3' to 5' exoribonuclease	-0.304954	0.0114803	0.316434
R-HSA-9018683	Biosynthesis of DPA-derived SPMs	-0.316365	-0.000253691	0.316111
R-HSA-9025094	Biosynthesis of DPAn-3 SPMs	-0.316365	-0.000253691	0.316111
R-HSA-114516	Disinhibition of SNARE formation	-0.299665	0.0161701	0.315835
R-HSA-381038	XBP1(S) activates chaperone genes	-0.221155	0.0943656	0.315521
R-HSA-3295583	TRP channels	-0.241559	0.0732125	0.314771
R-HSA-113507	E2F-enabled inhibition of pre-replication complex formation	-0.162518	0.152108	0.314626
R-HSA-1187000	Fertilization	-0.0291827	0.285073	0.314256
R-HSA-9845576	Glycosphingolipid transport	-0.34047	-0.0271852	0.313284
R-HSA-75158	TRAIL signaling	-0.343646	-0.0304198	0.313227
R-HSA-447041	CHL1 interactions	-0.205532	0.107409	0.312941
R-HSA-3238698	WNT ligand biogenesis and trafficking	-0.101135	0.211799	0.312934
R-HSA-381042	PERK regulates gene expression	-0.256169	0.0563648	0.312534
R-HSA-77289	Mitochondrial Fatty Acid Beta-Oxidation	-0.278149	0.0342272	0.312377
R-HSA-381771	Synthesis, secretion, and inactivation of Glucagon-like Peptide-1 (GLP-1)	-0.211714	0.100066	0.31178
R-HSA-9034015	Signaling by NTRK3 (TRKC)	-0.302161	0.00955883	0.31172
R-HSA-4551638	SUMOylation of chromatin organization proteins	-0.251106	0.0601877	0.311294
R-HSA-432720	Lysosome Vesicle Biogenesis	-0.252639	0.0585955	0.311235
R-HSA-72306	tRNA processing	-0.302493	0.0082979	0.310791
R-HSA-199992	trans-Golgi Network Vesicle Budding	-0.260678	0.0497734	0.310451
R-HSA-176408	Regulation of APC/C activators between G1/S and early anaphase	-0.244182	0.0662475	0.310429
R-HSA-68949	Orc1 removal from chromatin	-0.233954	0.0761902	0.310145
R-HSA-351143	Agmatine biosynthesis	-0.0811502	0.228743	0.309893
R-HSA-180024	DARPP-32 events	-0.287522	0.0222909	0.309813
R-HSA-418889	Caspase activation via Dependence Receptors in the absence of ligand	-0.219681	0.089912	0.309593
R-HSA-5365859	RA biosynthesis pathway	-0.0799362	0.229433	0.309369
R-HSA-2426168	Activation of gene expression by SREBF (SREBP)	-0.297096	0.0118126	0.308909
R-HSA-379716	Cytosolic tRNA aminoacylation	-0.247263	0.0614959	0.308759
R-HSA-76071	RNA Polymerase III Transcription Initiation From Type 3 Promoter	-0.242091	0.0663552	0.308447
R-HSA-2046105	Linoleic acid (LA) metabolism	-0.00823124	0.300197	0.308428
R-HSA-983695	Antigen activates B Cell Receptor (BCR) leading to generation of second messengers	-0.219192	0.088666	0.307858
R-HSA-140877	Formation of Fibrin Clot (Clotting Cascade)	-0.173066	0.134645	0.307711
R-HSA-196299	Beta-catenin phosphorylation cascade	-0.279564	0.0281146	0.307678
R-HSA-1638091	Heparan sulfate/heparin (HS-GAG) metabolism	-0.092909	0.214673	0.307581
R-HSA-2187338	Visual phototransduction	-0.172232	0.135209	0.307441
R-HSA-112308	Presynaptic depolarization and calcium channel opening	0.212552	0.519532	0.30698
R-HSA-430116	GP1b-IX-V activation signalling	-0.249485	0.0571149	0.3066
R-HSA-202433	Generation of second messenger molecules	-0.217302	0.0886885	0.30599
R-HSA-9008059	Interleukin-37 signaling	-0.278624	0.0266217	0.305245
R-HSA-9913351	Formation of the dystrophin-glycoprotein complex (DGC)	-0.15799	0.146994	0.304984
R-HSA-9754189	Germ layer formation at gastrulation	-0.228529	0.0764126	0.304942
R-HSA-9834899	Specification of the neural plate border	-0.206322	0.0976984	0.304021
R-HSA-8941333	RUNX2 regulates genes involved in differentiation of myeloid cells	-0.195772	0.10791	0.303683
R-HSA-9842663	Signaling by LTK	-0.227904	0.075633	0.303537
R-HSA-9823730	Formation of definitive endoderm	-0.227889	0.0753738	0.303263
R-HSA-5610783	Degradation of GLI2 by the proteasome	-0.232519	0.0704705	0.302989
R-HSA-9793242	SUMOylation of nuclear envelope proteins	-0.338271	-0.0354725	0.302799
R-HSA-5669034	TNFs bind their physiological receptors	-0.176673	0.125014	0.301687
R-HSA-8854691	Interleukin-20 family signaling	-0.176522	0.124986	0.301507
R-HSA-9031628	NGF-stimulated transcription	-0.20997	0.0910695	0.30104
R-HSA-6787450	tRNA modification in the mitochondrion	-0.308135	-0.00710998	0.301025
R-HSA-113501	Inhibition of replication initiation of damaged DNA by RB1/E2F1	-0.312362	-0.0114437	0.300918
R-HSA-70895	Branched-chain amino acid catabolism	-0.239749	0.061152	0.300901
R-HSA-389513	Co-inhibition by CTLA4	-0.303755	-0.00341501	0.30034
R-HSA-3065676	SUMO is conjugated to E1 (UBA2:SAE1)	-0.303733	-0.00388432	0.299848
R-HSA-5610785	GLI3 is processed to GLI3R by the proteasome	-0.230219	0.069301	0.29952
R-HSA-163765	ChREBP activates metabolic gene expression	-0.278446	0.0205028	0.298948
R-HSA-5610780	Degradation of GLI1 by the proteasome	-0.22878	0.069915	0.298695
R-HSA-351906	Apoptotic cleavage of cell adhesion proteins	-0.252439	0.0458981	0.298337
R-HSA-2453902	The canonical retinoid cycle in rods (twilight vision)	-0.152648	0.145618	0.298266
R-HSA-1483226	Synthesis of PI	0.0738075	0.370707	0.2969
R-HSA-8980692	RHOA GTPase cycle	-0.238449	0.0582098	0.296658
R-HSA-417957	P2Y receptors	-0.296689	-0.000430901	0.296258
R-HSA-189200	Cellular hexose transport	-0.0690652	0.226895	0.295961
R-HSA-111885	Opioid Signalling	-0.260338	0.0353781	0.295716
R-HSA-6811442	Intra-Golgi and retrograde Golgi-to-ER traffic	-0.24194	0.0537151	0.295655
R-HSA-9840310	Glycosphingolipid catabolism	-0.136122	0.159326	0.295448
R-HSA-983189	Kinesins	-0.144619	0.15074	0.295359
R-HSA-9828211	Regulation of TBK1, IKK蔚-mediated activation of IRF3, IRF7 upon TLR3 ligation	-0.255817	0.0392797	0.295096
R-HSA-1650814	Collagen biosynthesis and modifying enzymes	-0.134187	0.160634	0.294821
R-HSA-8851680	Butyrophilin (BTN) family interactions	-0.102228	0.192136	0.294364
R-HSA-157858	Gap junction trafficking and regulation	-0.202517	0.0918399	0.294357
R-HSA-9752946	Expression and translocation of olfactory receptors	-0.103767	0.19056	0.294327
R-HSA-3065678	SUMO is transferred from E1 to E2 (UBE2I, UBC9)	-0.309448	-0.0151789	0.294269
R-HSA-1433557	Signaling by SCF-KIT	-0.241529	0.052603	0.294132
R-HSA-2172127	DAP12 interactions	-0.24322	0.050632	0.293852
R-HSA-114452	Activation of BH3-only proteins	-0.282649	0.0110924	0.293742
R-HSA-176417	Phosphorylation of Emi1	-0.21107	0.0824266	0.293497
R-HSA-8873719	RAB geranylgeranylation	-0.215207	0.0782113	0.293418
R-HSA-3065679	SUMO is proteolytically processed	-0.307351	-0.0146235	0.292728
R-HSA-1059683	Interleukin-6 signaling	-0.222437	0.0702146	0.292652
R-HSA-917729	Endosomal Sorting Complex Required For Transport (ESCRT)	-0.230888	0.0615094	0.292397
R-HSA-69200	Phosphorylation of proteins involved in G1/S transition by active Cyclin E:Cdk2 complexes	-0.337658	-0.0458242	0.291834
R-HSA-1482798	Acyl chain remodeling of CL	-0.234767	0.0566456	0.291412
R-HSA-1296071	Potassium Channels	7.336132e-05	0.29106	0.290986
R-HSA-177929	Signaling by EGFR	-0.235788	0.0550796	0.290868
R-HSA-9837092	FASTK family proteins regulate processing and stability of mitochondrial RNAs	-0.156253	0.134556	0.29081
R-HSA-381070	IRE1alpha activates chaperones	-0.200586	0.0901914	0.290777
R-HSA-1483166	Synthesis of PA	-0.103502	0.187189	0.290692
R-HSA-512988	Interleukin-3, Interleukin-5 and GM-CSF signaling	-0.231969	0.0585941	0.290564
R-HSA-381183	ATF6 (ATF6-alpha) activates chaperone genes	-0.203963	0.0865066	0.29047
R-HSA-9824878	Regulation of TBK1, IKK蔚 (IKBKE)-mediated activation of IRF3, IRF7	-0.257624	0.032606	0.29023
R-HSA-8853659	RET signaling	-0.215785	0.0744317	0.290217
R-HSA-375276	Peptide ligand-binding receptors	-0.184392	0.105757	0.290149
R-HSA-9614657	FOXO-mediated transcription of cell death genes	-0.323169	-0.0330506	0.290118
R-HSA-176412	Phosphorylation of the APC/C	-0.21983	0.0692374	0.289067
R-HSA-2161517	Abacavir transmembrane transport	-0.0149013	0.274151	0.289052
R-HSA-75105	Fatty acyl-CoA biosynthesis	-0.252311	0.0364921	0.288803
R-HSA-936964	Activation of IRF3, IRF7 mediated by TBK1, IKK蔚 (IKBKE)	-0.257956	0.0306524	0.288609
R-HSA-69231	Cyclin D associated events in G1	-0.266807	0.0217876	0.288595
R-HSA-69236	G1 Phase	-0.266807	0.0217876	0.288595
R-HSA-9013973	TICAM1-dependent activation of IRF3/IRF7	-0.261601	0.0262604	0.287861
R-HSA-9020933	Interleukin-23 signaling	-0.204586	0.0829529	0.287539
R-HSA-4085001	Sialic acid metabolism	-0.25638	0.0311018	0.287482
R-HSA-2161522	Abacavir ADME	0.0377668	0.325201	0.287434
R-HSA-381033	ATF6 (ATF6-alpha) activates chaperones	-0.20814	0.0792344	0.287374
R-HSA-9013405	RHOD GTPase cycle	-0.250624	0.0364526	0.287077
R-HSA-8856688	Golgi-to-ER retrograde transport	-0.258682	0.0283235	0.287005
R-HSA-190828	Gap junction trafficking	-0.198956	0.0878231	0.28678
R-HSA-2032785	YAP1- and WWTR1 (TAZ)-stimulated gene expression	-0.163379	0.123088	0.286466
R-HSA-9768919	NPAS4 regulates expression of target genes	-0.217617	0.0687566	0.286373
R-HSA-9617828	FOXO-mediated transcription of cell cycle genes	-0.236389	0.0491119	0.285501
R-HSA-9753281	Paracetamol ADME	-0.0617236	0.22365	0.285373
R-HSA-445095	Interaction between L1 and Ankyrins	-0.0849879	0.200062	0.28505
R-HSA-69186	Lagging Strand Synthesis	-0.276499	0.00807027	0.284569
R-HSA-936440	Negative regulators of DDX58/IFIH1 signaling	-0.281912	0.0025637	0.284476
R-HSA-5685942	HDR through Homologous Recombination (HRR)	-0.24588	0.038287	0.284167
R-HSA-375165	NCAM signaling for neurite out-growth	-0.269503	0.0143466	0.28385
R-HSA-193807	Synthesis of bile acids and bile salts via 27-hydroxycholesterol	-0.234645	0.0484849	0.28313
R-HSA-9754119	Drug-mediated inhibition of CDK4/CDK6 activity	-0.364754	-0.0822218	0.282532
R-HSA-190872	Transport of connexons to the plasma membrane	-0.0772815	0.205161	0.282443
R-HSA-5685939	HDR through MMEJ (alt-NHEJ)	-0.281609	0.000562954	0.282172
R-HSA-196854	Metabolism of vitamins and cofactors	-0.215932	0.0659888	0.281921
R-HSA-6783589	Interleukin-6 family signaling	-0.204253	0.0776098	0.281863
R-HSA-3928664	Ephrin signaling	-0.222606	0.0592189	0.281825
R-HSA-204174	Regulation of pyruvate dehydrogenase (PDH) complex	-0.264277	0.0172054	0.281482
R-HSA-264870	Caspase-mediated cleavage of cytoskeletal proteins	-0.205945	0.0754373	0.281383
R-HSA-432722	Golgi Associated Vesicle Biogenesis	-0.264236	0.0170555	0.281291
R-HSA-373753	Nephrin family interactions	-0.18915	0.0914781	0.280628
R-HSA-2424491	DAP12 signaling	-0.242932	0.0373396	0.280272
R-HSA-140875	Common Pathway of Fibrin Clot Formation	-0.195608	0.0844016	0.28001
R-HSA-5578775	Ion homeostasis	-0.160833	0.118644	0.279477
R-HSA-9013424	RHOV GTPase cycle	-0.201487	0.0770908	0.278578
R-HSA-1296072	Voltage gated Potassium channels	0.119303	0.397408	0.278106
R-HSA-975576	N-glycan antennae elongation in the medial/trans-Golgi	-0.115904	0.162149	0.278054
R-HSA-1660661	Sphingolipid de novo biosynthesis	-0.142721	0.135174	0.277895
R-HSA-190861	Gap junction assembly	-0.120159	0.157629	0.277787
R-HSA-190704	Oligomerization of connexins into connexons	-0.112131	0.16421	0.276341
R-HSA-190827	Transport of connexins along the secretory pathway	-0.112131	0.16421	0.276341
R-HSA-4085377	SUMOylation of SUMOylation proteins	-0.277318	-0.0011906	0.276128
R-HSA-400508	Incretin synthesis, secretion, and inactivation	-0.18997	0.0861241	0.276094
R-HSA-397014	Muscle contraction	-0.143299	0.132777	0.276076
R-HSA-5362798	Release of Hh-Np from the secreting cell	-0.121958	0.153641	0.275599
R-HSA-1368108	BMAL1:CLOCK,NPAS2 activates circadian gene expression	-0.308395	-0.0329252	0.27547
R-HSA-400206	Regulation of lipid metabolism by PPARalpha	-0.246999	0.0283789	0.275378
R-HSA-111461	Cytochrome c-mediated apoptotic response	-0.268425	0.00672045	0.275145
R-HSA-9006335	Signaling by Erythropoietin	-0.227003	0.0480213	0.275024
R-HSA-1606341	IRF3 mediated activation of type 1 IFN	-0.234084	0.0406165	0.2747
R-HSA-2465910	MASTL Facilitates Mitotic Progression	-0.255628	0.018372	0.274
R-HSA-392517	Rap1 signalling	-0.259433	0.0143097	0.273743
R-HSA-3232142	SUMOylation of ubiquitinylation proteins	-0.236376	0.0369922	0.273369
R-HSA-2029480	Fcgamma receptor (FCGR) dependent phagocytosis	-0.232929	0.0400005	0.272929
R-HSA-6811434	COPI-dependent Golgi-to-ER retrograde traffic	-0.219738	0.0518561	0.271594
R-HSA-1989781	PPARA activates gene expression	-0.242807	0.0283468	0.271154
R-HSA-5358493	Synthesis of diphthamide-EEF2	-0.0858568	0.185227	0.271084
R-HSA-198753	ERK/MAPK targets	-0.309648	-0.0387075	0.27094
R-HSA-422356	Regulation of insulin secretion	-0.18741	0.0817626	0.269173
R-HSA-5218921	VEGFR2 mediated cell proliferation	-0.22291	0.0452942	0.268204
R-HSA-5607763	CLEC7A (Dectin-1) induces NFAT activation	-0.295962	-0.0278044	0.268158
R-HSA-352238	Breakdown of the nuclear lamina	-0.127389	0.140525	0.267913
R-HSA-3108214	SUMOylation of DNA damage response and repair proteins	-0.273114	-0.00543805	0.267676
R-HSA-391908	Prostanoid ligand receptors	-0.0833535	0.184026	0.267379
R-HSA-203641	NOSTRIN mediated eNOS trafficking	-0.232165	0.0350713	0.267237
R-HSA-8854214	TBC/RABGAPs	-0.261296	0.00593337	0.26723
R-HSA-6807004	Negative regulation of MET activity	-0.235867	0.0308084	0.266675
R-HSA-1483206	Glycerophospholipid biosynthesis	-0.215815	0.0498888	0.265704
R-HSA-3215018	Processing and activation of SUMO	-0.30054	-0.0357996	0.264741
R-HSA-196108	Pregnenolone biosynthesis	-0.223496	0.0411961	0.264693
R-HSA-1855191	Synthesis of IPs in the nucleus	-0.209143	0.0552719	0.264415
R-HSA-3772470	Negative regulation of TCF-dependent signaling by WNT ligand antagonists	-0.125752	0.138584	0.264336
R-HSA-111465	Apoptotic cleavage of cellular proteins	-0.225641	0.0386713	0.264312
R-HSA-9706019	RHOBTB3 ATPase cycle	-0.177747	0.0865583	0.264305
R-HSA-5576891	Cardiac conduction	-0.0893723	0.174597	0.263969
R-HSA-166658	Complement cascade	-0.155809	0.10764	0.26345
R-HSA-6783310	Fanconi Anemia Pathway	-0.226608	0.0364288	0.263037
R-HSA-9748784	Drug ADME	-0.127559	0.135324	0.262883
R-HSA-381753	Olfactory Signaling Pathway	-0.0618461	0.20051	0.262356
R-HSA-9022927	MECP2 regulates transcription of genes involved in GABA signaling	-0.0785711	0.183021	0.261592
R-HSA-196741	Cobalamin (Cbl, vitamin B12) transport and metabolism	-0.115757	0.145536	0.261292
R-HSA-111996	Ca-dependent events	-0.270742	-0.0100689	0.260673
R-HSA-69190	DNA strand elongation	-0.232797	0.0278144	0.260611
R-HSA-198725	Nuclear Events (kinase and transcription factor activation)	-0.244601	0.0158325	0.260434
R-HSA-432142	Platelet sensitization by LDL	-0.25223	0.00817278	0.260403
R-HSA-888568	GABA synthesis	-0.0341506	0.225706	0.259856
R-HSA-391903	Eicosanoid ligand-binding receptors	-0.0523473	0.207163	0.259511
R-HSA-186797	Signaling by PDGF	-0.192122	0.066891	0.259013
R-HSA-111933	Calmodulin induced events	-0.25236	0.00661157	0.258972
R-HSA-111997	CaM pathway	-0.25236	0.00661157	0.258972
R-HSA-77108	Utilization of Ketone Bodies	0.0482194	0.306931	0.258711
R-HSA-380994	ATF4 activates genes in response to endoplasmic reticulum stress	-0.26431	-0.0067833	0.257527
R-HSA-9614399	Regulation of localization of FOXO transcription factors	-0.259026	-0.0015565	0.257469
R-HSA-9013700	NOTCH4 Activation and Transmission of Signal to the Nucleus	-0.254943	0.00252105	0.257464
R-HSA-1630316	Glycosaminoglycan metabolism	-0.124001	0.133376	0.257377
R-HSA-5673000	RAF activation	-0.276986	-0.0196232	0.257363
R-HSA-5624958	ARL13B-mediated ciliary trafficking of INPP5E	-0.209694	0.0474378	0.257132
R-HSA-8875656	MET receptor recycling	-0.264381	-0.00799934	0.256382
R-HSA-5693548	Sensing of DNA Double Strand Breaks	-0.224783	0.0314388	0.256222
R-HSA-112043	PLC beta mediated events	-0.250252	0.0057812	0.256033
R-HSA-8854518	AURKA Activation by TPX2	-0.239019	0.0167408	0.25576
R-HSA-380259	Loss of Nlp from mitotic centrosomes	-0.23877	0.0159844	0.254754
R-HSA-380284	Loss of proteins required for interphase microtubule organization from the centrosome	-0.23877	0.0159844	0.254754
R-HSA-9013420	RHOU GTPase cycle	-0.190675	0.0629049	0.253579
R-HSA-112040	G-protein mediated events	-0.2483	0.00525498	0.253555
R-HSA-8935964	RUNX1 regulates expression of components of tight junctions	-0.108713	0.144749	0.253462
R-HSA-444209	Free fatty acid receptors	-0.164649	0.088665	0.253314
R-HSA-156584	Cytosolic sulfonation of small molecules	-0.131496	0.121416	0.252911
R-HSA-388844	Receptor-type tyrosine-protein phosphatases	-0.0261055	0.226621	0.252727
R-HSA-451306	Ionotropic activity of kainate receptors	-0.0499715	0.202736	0.252708
R-HSA-451308	Activation of Ca-permeable Kainate Receptor	-0.0499715	0.202736	0.252708
R-HSA-392154	Nitric oxide stimulates guanylate cyclase	0.00973865	0.262252	0.252514
R-HSA-8849932	Synaptic adhesion-like molecules	-0.0846335	0.167385	0.252019
R-HSA-9648895	Response of EIF2AK1 (HRI) to heme deficiency	-0.142564	0.109396	0.25196
R-HSA-6807878	COPI-mediated anterograde transport	-0.203989	0.0479314	0.251921
R-HSA-69273	Cyclin A/B1/B2 associated events during G2/M transition	-0.254427	-0.00306784	0.251359
R-HSA-204998	Cell death signalling via NRAGE, NRIF and NADE	-0.232894	0.0184208	0.251315
R-HSA-111447	Activation of BAD and translocation to mitochondria	-0.263591	-0.0133244	0.250267
R-HSA-3214847	HATs acetylate histones	-0.204896	0.0450148	0.249911
R-HSA-8957322	Metabolism of steroids	-0.231577	0.0179037	0.249481
R-HSA-418555	G alpha (s) signalling events	-0.102177	0.147266	0.249443
R-HSA-380320	Recruitment of NuMA to mitotic centrosomes	-0.232144	0.0169871	0.249131
R-HSA-1855183	Synthesis of IP2, IP, and Ins in the cytosol	-0.266528	-0.0177385	0.248789
R-HSA-209952	Peptide hormone biosynthesis	0.109833	0.358498	0.248664
R-HSA-9853506	OGDH complex synthesizes succinyl-CoA from 2-OG	-0.122365	0.125898	0.248263
R-HSA-1489509	DAG and IP3 signaling	-0.207566	0.040556	0.248122
R-HSA-2162123	Synthesis of Prostaglandins (PG) and Thromboxanes (TX)	-0.0858644	0.161426	0.247291
R-HSA-913709	O-linked glycosylation of mucins	-0.0766167	0.17063	0.247247
R-HSA-6807047	Cholesterol biosynthesis via desmosterol	-0.255092	-0.00818027	0.246912
R-HSA-6807062	Cholesterol biosynthesis via lathosterol	-0.255092	-0.00818027	0.246912
R-HSA-5693554	Resolution of D-loop Structures through Synthesis-Dependent Strand Annealing (SDSA)	-0.245008	0.00169825	0.246707
R-HSA-389661	Glyoxylate metabolism and glycine degradation	-0.078588	0.167799	0.246387
R-HSA-211976	Endogenous sterols	-0.117371	0.128751	0.246122
R-HSA-425397	Transport of vitamins, nucleosides, and related molecules	-0.108985	0.136647	0.245633
R-HSA-2142789	Ubiquinol biosynthesis	-0.180999	0.0640846	0.245084
R-HSA-5675221	Negative regulation of MAPK pathway	-0.251446	-0.00697658	0.24447
R-HSA-375280	Amine ligand-binding receptors	-0.109898	0.133571	0.243469
R-HSA-8939245	RUNX1 regulates transcription of genes involved in BCR signaling	-0.187185	0.0557811	0.242966
R-HSA-1793185	Chondroitin sulfate/dermatan sulfate metabolism	-0.174774	0.0680973	0.242871
R-HSA-380270	Recruitment of mitotic centrosome proteins and complexes	-0.231701	0.011105	0.242806
R-HSA-380287	Centrosome maturation	-0.231701	0.011105	0.242806
R-HSA-977606	Regulation of Complement cascade	-0.14625	0.0952343	0.241485
R-HSA-399719	Trafficking of AMPA receptors	-0.17137	0.0700434	0.241414
R-HSA-399721	Glutamate binding, activation of AMPA receptors and synaptic plasticity	-0.17137	0.0700434	0.241414
R-HSA-420499	Class C/3 (Metabotropic glutamate/pheromone receptors)	0.177566	0.418363	0.240797
R-HSA-427975	Proton/oligopeptide cotransporters	-0.0895223	0.151171	0.240693
R-HSA-9913635	Strand-asynchronous mitochondrial DNA replication	-0.156325	0.084091	0.240416
R-HSA-5635838	Activation of SMO	-0.136627	0.103469	0.240096
R-HSA-174577	Activation of C3 and C5	0.0574103	0.297065	0.239654
R-HSA-3371497	HSP90 chaperone cycle for steroid hormone receptors (SHR) in the presence of ligand	-0.202494	0.0370246	0.239518
R-HSA-9662361	Sensory processing of sound by outer hair cells of the cochlea	-0.150351	0.0880889	0.23844
R-HSA-373080	Class B/2 (Secretin family receptors)	-0.0618311	0.176488	0.238319
R-HSA-8854521	Interaction between PHLDA1 and AURKA	-0.159495	0.0782391	0.237734
R-HSA-210746	Regulation of gene expression in endocrine-committed (NEUROG3+) progenitor cells	-0.0929077	0.144214	0.237122
R-HSA-1855204	Synthesis of IP3 and IP4 in the cytosol	-0.162312	0.0741068	0.236419
R-HSA-75205	Dissolution of Fibrin Clot	-0.156884	0.0787918	0.235676
R-HSA-193144	Estrogen biosynthesis	-0.303423	-0.0678975	0.235526
R-HSA-977068	Termination of O-glycan biosynthesis	0.00770121	0.242927	0.235226
R-HSA-8874177	ATF6B (ATF6-beta) activates chaperones	-0.130362	0.104567	0.23493
R-HSA-9022707	MECP2 regulates transcription factors	-0.311326	-0.0766548	0.234671
R-HSA-8956319	Nucleotide catabolism	-0.153176	0.08128	0.234456
R-HSA-113510	E2F mediated regulation of DNA replication	-0.26734	-0.0333219	0.234018
R-HSA-389599	Alpha-oxidation of phytanate	-0.22589	0.00770377	0.233593
R-HSA-202670	ERKs are inactivated	-0.292715	-0.0595535	0.233161
R-HSA-400511	Synthesis, secretion, and inactivation of Glucose-dependent Insulinotropic Polypeptide (GIP)	-0.171359	0.0611724	0.232531
R-HSA-4641262	Disassembly of the destruction complex and recruitment of AXIN to the membrane	-0.225895	0.00617251	0.232067
R-HSA-5668599	RHO GTPases Activate NADPH Oxidases	-0.265102	-0.0331613	0.23194
R-HSA-68881	Mitotic Metaphase/Anaphase Transition	-0.249301	-0.0190801	0.230221
R-HSA-199220	Vitamin B5 (pantothenate) metabolism	-0.0584861	0.171539	0.230025
R-HSA-186763	Downstream signal transduction	-0.194963	0.0339449	0.228908
R-HSA-5652084	Fructose metabolism	-0.0852908	0.142997	0.228288
R-HSA-5693537	Resolution of D-Loop Structures	-0.232442	-0.00455389	0.227888
R-HSA-5693568	Resolution of D-loop Structures through Holliday Junction Intermediates	-0.232442	-0.00455389	0.227888
R-HSA-1483257	Phospholipid metabolism	-0.208164	0.0188916	0.227055
R-HSA-6783984	Glycine degradation	-0.117002	0.109683	0.226684
R-HSA-390247	Beta-oxidation of very long chain fatty acids	-0.190472	0.0354504	0.225923
R-HSA-190322	FGFR4 ligand binding and activation	-0.0442181	0.181599	0.225817
R-HSA-1170546	Prolactin receptor signaling	-0.231584	-0.00636157	0.225222
R-HSA-5693616	Presynaptic phase of homologous DNA pairing and strand exchange	-0.223695	0.000762555	0.224457
R-HSA-418346	Platelet homeostasis	-0.18945	0.0347357	0.224185
R-HSA-163767	PP2A-mediated dephosphorylation of key metabolic factors	-0.28569	-0.0625372	0.223152
R-HSA-2029485	Role of phospholipids in phagocytosis	-0.182567	0.0397445	0.222311
R-HSA-9006115	Signaling by NTRK2 (TRKB)	-0.186819	0.0351181	0.221937
R-HSA-83936	Transport of nucleosides and free purine and pyrimidine bases across the plasma membrane	-0.0206892	0.201219	0.221908
R-HSA-5654687	Downstream signaling of activated FGFR1	-0.185356	0.0358541	0.22121
R-HSA-189451	Heme biosynthesis	-0.109915	0.111225	0.22114
R-HSA-5654696	Downstream signaling of activated FGFR2	-0.185268	0.0351838	0.220452
R-HSA-203754	NOSIP mediated eNOS trafficking	-0.113798	0.105199	0.218997
R-HSA-5693579	Homologous DNA Pairing and Strand Exchange	-0.22509	-0.00655008	0.21854
R-HSA-804914	Transport of fatty acids	-0.17629	0.0421488	0.218439
R-HSA-8939246	RUNX1 regulates transcription of genes involved in differentiation of myeloid cells	-0.293164	-0.0748824	0.218282
R-HSA-196849	Metabolism of water-soluble vitamins and cofactors	-0.167223	0.0500317	0.217255
R-HSA-75035	Chk1/Chk2(Cds1) mediated inactivation of Cyclin B:Cdk1 complex	-0.235575	-0.0183316	0.217243
R-HSA-1660662	Glycosphingolipid metabolism	-0.057723	0.159046	0.216768
R-HSA-1980145	Signaling by NOTCH2	-0.139106	0.077583	0.216689
R-HSA-5654743	Signaling by FGFR4	-0.226601	-0.010148	0.216453
R-HSA-9634635	Estrogen-stimulated signaling through PRKCZ	-0.318411	-0.103086	0.215325
R-HSA-111458	Formation of apoptosome	-0.242532	-0.0274231	0.215109
R-HSA-9627069	Regulation of the apoptosome activity	-0.242532	-0.0274231	0.215109
R-HSA-6793080	rRNA modification in the mitochondrion	-0.283678	-0.0704508	0.213227
R-HSA-5682910	LGI-ADAM interactions	-0.170634	0.0420727	0.212707
R-HSA-549127	Organic cation transport	-0.114796	0.0977507	0.212547
R-HSA-549132	Organic cation/anion/zwitterion transport	-0.114796	0.0977507	0.212547
R-HSA-9858328	OADH complex synthesizes glutaryl-CoA from 2-OA	-0.100738	0.111797	0.212535
R-HSA-432047	Passive transport by Aquaporins	-0.0966026	0.115794	0.212397
R-HSA-5654708	Downstream signaling of activated FGFR3	-0.181715	0.030498	0.212213
R-HSA-9696273	RND1 GTPase cycle	-0.119261	0.0926437	0.211904
R-HSA-9018677	Biosynthesis of DHA-derived SPMs	-0.282555	-0.0708175	0.211738
R-HSA-1614635	Sulfur amino acid metabolism	-0.140654	0.0710479	0.211702
R-HSA-5654700	FRS-mediated FGFR2 signaling	-0.140366	0.0689618	0.209327
R-HSA-5654741	Signaling by FGFR3	-0.225354	-0.01648	0.208874
R-HSA-390648	Muscarinic acetylcholine receptors	-0.224954	-0.0161904	0.208763
R-HSA-352230	Amino acid transport across the plasma membrane	-0.0953556	0.112971	0.208326
R-HSA-163125	Post-translational modification: synthesis of GPI-anchored proteins	-0.0274977	0.180234	0.207732
R-HSA-1307965	betaKlotho-mediated ligand binding	0.163932	0.371649	0.207717
R-HSA-9620244	Long-term potentiation	-0.124265	0.0829267	0.207192
R-HSA-193048	Androgen biosynthesis	0.0222867	0.229189	0.206903
R-HSA-9018678	Biosynthesis of specialized proresolving mediators (SPMs)	-0.273135	-0.0670942	0.206041
R-HSA-5654716	Downstream signaling of activated FGFR4	-0.174772	0.0307097	0.205482
R-HSA-5368598	Negative regulation of TCF-dependent signaling by DVL-interacting proteins	-0.231346	-0.0260328	0.205313
R-HSA-8963743	Digestion and absorption	-0.0451178	0.159204	0.204322
R-HSA-5654699	SHC-mediated cascade:FGFR2	-0.319494	-0.115279	0.204215
R-HSA-156580	Phase II - Conjugation of compounds	-0.10426	0.0998865	0.204146
R-HSA-8851907	MET activates PI3K/AKT signaling	-0.215811	-0.0117699	0.204041
R-HSA-450604	KSRP (KHSRP) binds and destabilizes mRNA	-0.247214	-0.0434888	0.203725
R-HSA-191273	Cholesterol biosynthesis	-0.181604	0.02208	0.203684
R-HSA-5654693	FRS-mediated FGFR1 signaling	-0.141077	0.0624239	0.203501
R-HSA-1483255	PI Metabolism	-0.199402	0.00346995	0.202872
R-HSA-196780	Biotin transport and metabolism	-0.223628	-0.0210118	0.202616
R-HSA-8851805	MET activates RAS signaling	-0.254713	-0.0524551	0.202258
R-HSA-1482839	Acyl chain remodelling of PE	-0.0213955	0.18011	0.201505
R-HSA-9733709	Cardiogenesis	-0.186341	0.015156	0.201497
R-HSA-8849470	PTK6 Regulates Cell Cycle	-0.240119	-0.0394903	0.200629
R-HSA-442380	Zinc influx into cells by the SLC39 gene family	-0.091783	0.108796	0.200579
R-HSA-163685	Integration of energy metabolism	-0.187614	0.0125944	0.200209
R-HSA-74752	Signaling by Insulin receptor	-0.16457	0.0354783	0.200048
R-HSA-5654688	SHC-mediated cascade:FGFR1	-0.322635	-0.122594	0.200042
R-HSA-2980736	Peptide hormone metabolism	-0.183663	0.0156799	0.199343
R-HSA-3371571	HSF1-dependent transactivation	-0.190932	0.00831321	0.199245
R-HSA-9845614	Sphingolipid catabolism	-0.24246	-0.0441609	0.198299
R-HSA-139853	Elevation of cytosolic Ca2+ levels	-0.166972	0.0310746	0.198047
R-HSA-9840309	Glycosphingolipid biosynthesis	0.00140503	0.199167	0.197762
R-HSA-379724	tRNA Aminoacylation	-0.155958	0.041585	0.197543
R-HSA-5654736	Signaling by FGFR1	-0.212567	-0.0171404	0.195426
R-HSA-209776	Metabolism of amine-derived hormones	0.107625	0.3027	0.195075
R-HSA-9696270	RND2 GTPase cycle	-0.104386	0.0906247	0.195011
R-HSA-2393930	Phosphate bond hydrolysis by NUDT proteins	-0.0100764	0.184702	0.194778
R-HSA-5620920	Cargo trafficking to the periciliary membrane	-0.191601	0.00240189	0.194003
R-HSA-447043	Neurofascin interactions	-0.156382	0.0369128	0.193295
R-HSA-5694530	Cargo concentration in the ER	-0.159633	0.0333055	0.192939
R-HSA-9772755	Formation of WDR5-containing histone-modifying complexes	-0.1745	0.0173932	0.191893
R-HSA-2428928	IRS-related events triggered by IGF1R	-0.123134	0.0676352	0.19077
R-HSA-171007	p38MAPK events	-0.228477	-0.0381712	0.190306
R-HSA-9031525	NR1H2 & NR1H3 regulate gene expression to limit cholesterol uptake	-0.124908	0.0653823	0.190291
R-HSA-211981	Xenobiotics	-0.226188	-0.0369147	0.189273
R-HSA-2404192	Signaling by Type 1 Insulin-like Growth Factor 1 Receptor (IGF1R)	-0.126151	0.0626651	0.188816
R-HSA-2428924	IGF1R signaling cascade	-0.126151	0.0626651	0.188816
R-HSA-109704	PI3K Cascade	-0.0598135	0.128964	0.188777
R-HSA-191650	Regulation of gap junction activity	-0.102602	0.085444	0.188046
R-HSA-5685938	HDR through Single Strand Annealing (SSA)	-0.210423	-0.023421	0.187002
R-HSA-8874211	CREB3 factors activate genes	-0.163253	0.0234866	0.186739
R-HSA-6782315	tRNA modification in the nucleus and cytosol	-0.209147	-0.0231085	0.186038
R-HSA-5654706	FRS-mediated FGFR3 signaling	-0.124323	0.0601678	0.184491
R-HSA-379726	Mitochondrial tRNA aminoacylation	-0.133275	0.0503973	0.183672
R-HSA-9662360	Sensory processing of sound by inner hair cells of the cochlea	-0.149384	0.033666	0.18305
R-HSA-446219	Synthesis of substrates in N-glycan biosythesis	-0.191962	-0.00897932	0.182983
R-HSA-2979096	NOTCH2 Activation and Transmission of Signal to the Nucleus	-0.096668	0.085282	0.18195
R-HSA-442742	CREB1 phosphorylation through NMDA receptor-mediated activation of RAS signaling	-0.17483	0.00689157	0.181722
R-HSA-9007101	Rab regulation of trafficking	-0.215064	-0.0338996	0.181164
R-HSA-8876198	RAB GEFs exchange GTP for GDP on RABs	-0.208451	-0.0274671	0.180984
R-HSA-176974	Unwinding of DNA	-0.174794	0.00482651	0.179621
R-HSA-428157	Sphingolipid metabolism	-0.0904668	0.08848	0.178947
R-HSA-196791	Vitamin D (calciferol) metabolism	-0.193594	-0.015115	0.178479
R-HSA-210747	Regulation of gene expression in early pancreatic precursor cells	0.184367	0.362173	0.177806
R-HSA-165158	Activation of AKT2	-0.0451821	0.131391	0.176573
R-HSA-68911	G2 Phase	-0.236862	-0.0606302	0.176232
R-HSA-140534	Caspase activation via Death Receptors in the presence of ligand	-0.147762	0.0270783	0.17484
R-HSA-210993	Tie2 Signaling	-0.208349	-0.0336373	0.174712
R-HSA-212676	Dopamine Neurotransmitter Release Cycle	-0.168623	0.00575919	0.174382
R-HSA-418038	Nucleotide-like (purinergic) receptors	-0.0984323	0.0745897	0.173022
R-HSA-9927354	Co-stimulation by ICOS	-0.191691	-0.0187882	0.172902
R-HSA-9793528	Ciprofloxacin ADME	-0.134858	0.0374279	0.172286
R-HSA-5676594	TNF receptor superfamily (TNFSF) members mediating non-canonical NF-kB pathway	-0.0914157	0.0800572	0.171473
R-HSA-3371378	Regulation by c-FLIP	-0.148967	0.0222124	0.17118
R-HSA-5218900	CASP8 activity is inhibited	-0.148967	0.0222124	0.17118
R-HSA-69416	Dimerization of procaspase-8	-0.148967	0.0222124	0.17118
R-HSA-205025	NADE modulates death signalling	-0.177365	-0.00637346	0.170992
R-HSA-447038	NrCAM interactions	0.0355269	0.205971	0.170444
R-HSA-428540	Activation of RAC1	-0.114825	0.0548655	0.169691
R-HSA-1369062	ABC transporters in lipid homeostasis	-0.00979934	0.158781	0.16858
R-HSA-70635	Urea cycle	0.0741092	0.241846	0.167737
R-HSA-5654710	PI-3K cascade:FGFR3	-0.132531	0.0342555	0.166786
R-HSA-933541	TRAF6 mediated IRF7 activation	-0.197949	-0.031429	0.16652
R-HSA-1169092	Activation of RAS in B cells	-0.305638	-0.139788	0.16585
R-HSA-5654712	FRS-mediated FGFR4 signaling	-0.106014	0.0597158	0.16573
R-HSA-74259	Purine catabolism	-0.108464	0.0563385	0.164803
R-HSA-1250342	PI3K events in ERBB4 signaling	-0.135273	0.0294626	0.164735
R-HSA-9609736	Assembly and cell surface presentation of NMDA receptors	-0.0383495	0.125155	0.163504
R-HSA-5654720	PI-3K cascade:FGFR4	-0.119971	0.0430133	0.162984
R-HSA-9028731	Activated NTRK2 signals through FRS2 and FRS3	-0.113253	0.0497229	0.162976
R-HSA-114508	Effects of PIP2 hydrolysis	-0.124006	0.0386696	0.162676
R-HSA-9659379	Sensory processing of sound	-0.120692	0.0416167	0.162308
R-HSA-8939242	RUNX1 regulates transcription of genes involved in differentiation of keratinocytes	-0.193402	-0.0320781	0.161324
R-HSA-450385	Butyrate Response Factor 1 (BRF1) binds and destabilizes mRNA	-0.249564	-0.0887534	0.160811
R-HSA-1483249	Inositol phosphate metabolism	-0.160422	-0.00075205	0.15967
R-HSA-8964572	Lipid particle organization	-0.0975369	0.0618442	0.159381
R-HSA-9613354	Lipophagy	-0.133736	0.025277	0.159013
R-HSA-200425	Carnitine shuttle	-0.0634933	0.0952868	0.15878
R-HSA-446193	Biosynthesis of the N-glycan precursor (dolichol lipid-linked oligosaccharide, LLO) and transfer to a nascent protein	-0.17427	-0.0158127	0.158458
R-HSA-425393	Transport of inorganic cations/anions and amino acids/oligopeptides	-0.068191	0.0900916	0.158283
R-HSA-1614558	Degradation of cysteine and homocysteine	-0.14898	0.00909091	0.158071
R-HSA-193775	Synthesis of bile acids and bile salts via 24-hydroxycholesterol	-0.0345789	0.120254	0.154833
R-HSA-3371568	Attenuation phase	-0.169198	-0.017236	0.151962
R-HSA-1181150	Signaling by NODAL	-0.197024	-0.0453448	0.151679
R-HSA-264876	Insulin processing	-0.167423	-0.0160573	0.151366
R-HSA-2871796	FCERI mediated MAPK activation	-0.216645	-0.0656732	0.150972
R-HSA-187687	Signalling to ERKs	-0.23619	-0.0862712	0.149919
R-HSA-9028335	Activated NTRK2 signals through PI3K	-0.217558	-0.0701743	0.147383
R-HSA-5620916	VxPx cargo-targeting to cilium	-0.21795	-0.0706643	0.147286
R-HSA-1660499	Synthesis of PIPs at the plasma membrane	-0.188049	-0.0410535	0.146995
R-HSA-1855167	Synthesis of pyrophosphates in the cytosol	-0.217316	-0.0704727	0.146844
R-HSA-438066	Unblocking of NMDA receptors, glutamate binding and activation	-0.0633722	0.08254	0.145912
R-HSA-112399	IRS-mediated signalling	-0.0915431	0.0540354	0.145579
R-HSA-9617324	Negative regulation of NMDA receptor-mediated neuronal transmission	-0.0497597	0.0957724	0.145532
R-HSA-194002	Glucocorticoid biosynthesis	0.165632	0.30962	0.143988
R-HSA-71064	Lysine catabolism	-0.0427018	0.100336	0.143038
R-HSA-5654695	PI-3K cascade:FGFR2	-0.13396	0.00878331	0.142743
R-HSA-9026519	Activated NTRK2 signals through RAS	-0.291378	-0.149903	0.141476
R-HSA-5173214	O-glycosylation of TSR domain-containing proteins	0.194127	0.335314	0.141187
R-HSA-5683826	Surfactant metabolism	-0.0798264	0.0612862	0.141113
R-HSA-5654689	PI-3K cascade:FGFR1	-0.134353	0.00517095	0.139524
R-HSA-9717207	Sensory perception of sweet, bitter, and umami (glutamate) taste	0.046022	0.185533	0.139511
R-HSA-9034864	Activated NTRK3 signals through RAS	-0.208349	-0.0693699	0.138979
R-HSA-425407	SLC-mediated transmembrane transport	-0.0635098	0.0735778	0.137088
R-HSA-196071	Metabolism of steroid hormones	-0.146667	-0.0110017	0.135665
R-HSA-1483248	Synthesis of PIPs at the ER membrane	-0.156583	-0.0225109	0.134072
R-HSA-181429	Serotonin Neurotransmitter Release Cycle	-0.159371	-0.0253247	0.134046
R-HSA-210500	Glutamate Neurotransmitter Release Cycle	-0.146694	-0.0139386	0.132756
R-HSA-2151209	Activation of PPARGC1A (PGC-1alpha) by phosphorylation	-0.0995451	0.0330211	0.132566
R-HSA-2871809	FCERI mediated Ca+2 mobilization	-0.152285	-0.0203677	0.131917
R-HSA-8978868	Fatty acid metabolism	-0.129333	0.00249657	0.13183
R-HSA-162658	Golgi Cisternae Pericentriolar Stack Reorganization	-0.130869	0.000344927	0.131214
R-HSA-5658623	FGFRL1 modulation of FGFR1 signaling	-0.17524	-0.0456498	0.12959
R-HSA-5654719	SHC-mediated cascade:FGFR4	-0.253054	-0.124593	0.128461
R-HSA-8937144	Aryl hydrocarbon receptor signalling	-0.13868	-0.0115135	0.127166
R-HSA-5654704	SHC-mediated cascade:FGFR3	-0.286189	-0.160328	0.125861
R-HSA-9857492	Protein lipoylation	-0.0990852	0.0261128	0.125198
R-HSA-1502540	Signaling by Activin	-0.162736	-0.0399689	0.122767
R-HSA-1614603	Cysteine formation from homocysteine	0.0164683	0.137924	0.121455
R-HSA-9717189	Sensory perception of taste	0.0885077	0.209694	0.121187
R-HSA-416993	Trafficking of GluR2-containing AMPA receptors	-0.0821133	0.0390484	0.121162
R-HSA-442982	Ras activation upon Ca2+ influx through NMDA receptor	-0.0818977	0.0387318	0.12063
R-HSA-181430	Norepinephrine Neurotransmitter Release Cycle	-0.147246	-0.0308253	0.116421
R-HSA-5173105	O-linked glycosylation	0.0169767	0.133318	0.116341
R-HSA-449836	Other interleukin signaling	-0.154734	-0.0397787	0.114955
R-HSA-170968	Frs2-mediated activation	-0.224293	-0.109399	0.114894
R-HSA-5357786	TNFR1-induced proapoptotic signaling	-0.100058	0.0146749	0.114733
R-HSA-1433617	Regulation of signaling by NODAL	-0.149373	-0.0360227	0.113351
R-HSA-176187	Activation of ATR in response to replication stress	-0.111371	-0.000234317	0.111136
R-HSA-450513	Tristetraprolin (TTP, ZFP36) binds and destabilizes mRNA	-0.224539	-0.120122	0.104417
R-HSA-163680	AMPK inhibits chREBP transcriptional activation activity	-0.116332	-0.011986	0.104346
R-HSA-74751	Insulin receptor signalling cascade	-0.142521	-0.0399302	0.10259
R-HSA-6811438	Intra-Golgi traffic	-0.177028	-0.0745918	0.102436
R-HSA-1482788	Acyl chain remodelling of PC	-0.0895954	0.0110598	0.100655
R-HSA-6794361	Neurexins and neuroligins	-0.0306933	0.0675194	0.0982128
R-HSA-390918	Peroxisomal lipid metabolism	-0.106057	-0.00925437	0.0968023
R-HSA-204005	COPII-mediated vesicle transport	-0.102882	-0.0086749	0.0942075
R-HSA-9603798	Class I peroxisomal membrane protein import	-0.0918366	0.000355861	0.0921925
R-HSA-169893	Prolonged ERK activation events	-0.21436	-0.123217	0.091143
R-HSA-9861559	PDH complex synthesizes acetyl-CoA from PYR	-0.222613	-0.13215	0.0904635
R-HSA-112310	Neurotransmitter release cycle	-0.0820523	0.00829721	0.0903495
R-HSA-425366	Transport of bile salts and organic acids, metal ions and amine compounds	-0.0733139	0.0159109	0.0892249
R-HSA-3371511	HSF1 activation	-0.155306	-0.0665597	0.0887464
R-HSA-211945	Phase I - Functionalization of compounds	-0.0875911	0.00102006	0.0886112
R-HSA-435368	Zinc efflux and compartmentalization by the SLC30 family	-0.131628	-0.043386	0.0882424
R-HSA-6794362	Protein-protein interactions at synapses	-0.0391496	0.0475642	0.0867138
R-HSA-264642	Acetylcholine Neurotransmitter Release Cycle	-0.13812	-0.0526928	0.0854276
R-HSA-3371453	Regulation of HSF1-mediated heat shock response	-0.112408	-0.0303263	0.0820821
R-HSA-68962	Activation of the pre-replicative complex	-0.138475	-0.0592884	0.0791866
R-HSA-425410	Metal ion SLC transporters	-0.0726694	0.0015079	0.0741773
R-HSA-888590	GABA synthesis, release, reuptake and degradation	-0.0892428	-0.0179946	0.0712482
R-HSA-5357769	Caspase activation via extrinsic apoptotic signalling pathway	-0.0998729	-0.0308902	0.0689828
R-HSA-211897	Cytochrome P450 - arranged by substrate type	-0.0720562	-0.00813574	0.0639204
R-HSA-170984	ARMS-mediated activation	-0.182747	-0.121335	0.0614125
R-HSA-435354	Zinc transporters	-0.0675695	-0.00793322	0.0596363
R-HSA-211859	Biological oxidations	-0.0466123	0.0118107	0.058423
R-HSA-2142753	Arachidonate metabolism	-0.058527	-0.00474484	0.0537822
R-HSA-2028269	Signaling by Hippo	-0.132805	-0.0881184	0.0446868
