# Supplementary material for: Integrated bulk RNA and single-cell RNA sequencing to identify and validate exercise-related genes for predicting the prognosis of invasive ductal carcinoma
Source: Research Square preprint supplement (doi:10.21203/rs.3.rs-8444169/v1), 2026-01-16
Supplement: Supplementary file 18 [file f2965635ee62653870a5046a.xlsx]

## Sheet: Supplementary Table 15
Gene set enrichment analysis (GSEA) pathways for IL16
ID	setSize	enrichmentScore	NES	pvalue	p.adjust	qvalue	rank	leading_edge	core_enrichment
HALLMARK_MYC_TARGETS_V2	57	-0.795463	-3.56157	1e-10	2.73333333333333e-10	9.12280701754386e-11	3752	tags=77%, list=7%, signal=72%	MYC/PUS1/RABEPK/WDR74/SORD/TCOF1/GRWD1/IMP4/PPAN/WDR43/SLC29A2/NDUFAF4/NOLC1/NOP16/PES1/PLK4/MPHOSPH10/PLK1/MRTO4/SUPV3L1/NOC4L/AIMP2/NOP56/GNL3/MCM4/RRP12/NPM1/TBRG4/DCTPP1/EXOSC5/RRP9/PRMT3/LAS1L/HK2/TFB2M/FARSA/BYSL/TMEM97/UNG/PA2G4/SLC19A1/CBX3/HSPE1/HSPD1
HALLMARK_ALLOGRAFT_REJECTION	200	0.829411327895914	2.1348536543459	1e-10	2.73333333333333e-10	9.12280701754386e-11	4817	tags=68%, list=8%, signal=62%	IL16/CRTAM/HLA-DOA/PTPRC/HCLS1/CD4/IRF8/PRKCB/LCP2/CCR2/CD3G/ITK/HLA-DMB/CD28/HLA-DRA/FYB1/CXCR3/CD3E/TRAT1/SIT1/CD2/CD96/CD40LG/WAS/CCR5/STAT4/HLA-DQA1/CD3D/CCND2/IL12RB1/GZMA/NLRP3/IRF4/GPR65/IGSF6/CD247/CD74/NCF4/IL2RB/LCK/ST8SIA4/ZAP70/MAP4K1/FGR/LY86/CD8A/HLA-DMA/CD40/FASLG/ITGB2/IL2RG/SRGN/SPI1/CD86/ITGAL/ETS1/KLRD1/CD79A/PRF1/CD1D/CXCL9/IL18RAP/CCL5/CTSS/CCL19/CD8B/HLA-E/IL12B/IL2RA/LTB/CC…
HALLMARK_INFLAMMATORY_RESPONSE	199	0.803483337566597	2.06884834381521	1e-10	2.73333333333333e-10	9.12280701754386e-11	6798	tags=68%, list=12%, signal=60%	IL10RA/CD48/LCP2/PIK3R5/SLAMF1/KCNA3/TNFRSF1B/IL7R/PTGER4/NLRP3/EBI3/CD69/IL2RB/LCK/PTAFR/CXCR6/CYBB/TNFRSF9/LTA/CD40/CMKLR1/CCR7/SELL/IL18R1/C3AR1/GPR183/CXCL9/IL18RAP/CCL5/AXL/EMP3/IL12B/SCARF1/FPR1/CCL22/STAB1/CCRL2/ADGRE1/IL10/GPR132/IL15RA/PTGIR/HAS2/IRF1/GP1BA/P2RX7/PDPN/IL15/IL18/IL4R/LYN/SELE/CD70/IL1R1/TLR1/PTPRE/CCL17/PTGER2/RGS1/CSF1/CXCL11/OLR1/CHST2/MSR1/CXCL10/LAMP3/CCL2/TLR2/SEMA4D…
HALLMARK_INTERFERON_GAMMA_RESPONSE	199	0.801763406483834	2.06441978082493	1e-10	2.73333333333333e-10	9.12280701754386e-11	8111	tags=75%, list=14%, signal=65%	IL10RA/IRF8/CSF2RB/FGL2/LCP2/STAT4/HLA-DQA1/CIITA/C1S/BANK1/GZMA/IRF4/SLAMF7/CD74/CD69/IL2RB/SERPING1/ST8SIA4/HLA-DRB1/CFH/HLA-DMA/CD40/CMKLR1/CD86/GPR18/P2RY14/VCAM1/C1R/CXCL9/CCL5/IL18BP/ITGB7/TNFAIP3/MARCHF1/GBP4/CD38/XCL1/FPR1/SAMHD1/EPSTI1/VAMP5/SELP/FAS/NLRC5/IL15RA/KLRK1/FCGR1A/CD274/CASP4/B2M/CASP1/IRF1/ZBP1/IL7/IL15/SAMD9L/IL4R/IDO1/GBP6/ST3GAL5/STAT2/PSMB10/CXCL11/PSMB9/CXCL10/NOD1/APOL…
HALLMARK_IL6_JAK_STAT3_SIGNALING	87	0.808983793633905	2.0512257135767	1e-10	2.73333333333333e-10	9.12280701754386e-11	6283	tags=71%, list=11%, signal=63%	CSF2RB/PIK3R5/TNFRSF1B/IL12RB1/EBI3/IL2RG/ITGA4/IL18R1/ACVRL1/CXCL9/IL9R/CSF2RA/IL2RA/LTB/CD38/TGFB1/FAS/A2M/IL15RA/IRF1/CXCL13/IL7/CCR1/IL3RA/IL4R/IL1R1/STAT2/CSF1/CXCL11/CXCL10/TLR2/SOCS1/CD14/CRLF2/PIM1/IL1B/SOCS3/PLA2G2A/HMOX1/STAT1/IL1R2/IFNGR1/LEPR/CSF2/IL6/MYD88/TNF/IL17RA/IRF9/OSMR/CD36/CSF3R/MAP3K8/TNFRSF1A/ITGB3/CXCL1/IFNGR2/PDGFC/CBL/TYK2/DNTT/JUN
HALLMARK_INTERFERON_ALPHA_RESPONSE	97	0.788648073635962	2.00416259413066	1e-10	2.73333333333333e-10	9.12280701754386e-11	9313	tags=79%, list=16%, signal=66%	C1S/CD74/SELL/GBP4/EPSTI1/CCRL2/TMEM140/GBP2/B2M/CASP1/IRF1/LPAR6/IL7/IL15/SAMD9L/IL4R/STAT2/CSF1/CXCL11/PSMB9/CXCL10/LAMP3/IFI30/LAP3/TRIM21/TXNIP/SP110/TAP1/UBA7/HLA-C/WARS1/PARP14/SAMD9/NMI/PSMB8/RSAD2/IFIT3/IRF9/UBE2L6/IRF2/IFI44L/BATF2/IFIT2/CASP8/RTP4/IFI44/PROCR/ISG20/PSME2/PARP9/TRAFD1/NUB1/NCOA7/IFIH1/TRIM5/DDX60/CMPK2/TRIM14/PLSCR1/IFI27/HERC6/IFI35/OASL/IFITM1/PSME1/PARP12/IRF7/ELF1/IF…
HALLMARK_EPITHELIAL_MESENCHYMAL_TRANSITION	200	0.777990222312144	2.00249889685241	1e-10	2.73333333333333e-10	9.12280701754386e-11	8975	tags=79%, list=16%, signal=67%	WIPF1/ABI3BP/VCAM1/CXCL12/DAB2/EMP3/TNFAIP3/GLIPR1/DCN/TGFB1/FAS/LRP1/MMP2/SLIT2/PRRX1/FBLN2/IL32/SLIT3/FSTL1/ECM2/SFRP4/LAMA2/COL6A3/LUM/MXRA5/ADAM12/IL15/TGM2/DPYSL3/FAP/FBN1/FBLN5/GAS1/CDH11/PDGFRB/THY1/EFEMP2/GEM/HTRA1/PCOLCE/NT5E/COL3A1/VCAN/SNAI2/MFAP5/FBLN1/LOXL1/NID2/NNMT/COL6A2/LRRC15/MYLK/COL1A2/VEGFC/COL1A1/COL8A2/COL5A2/CALD1/COL5A1/BGN/VIM/MMP3/SPARC/THBS2/POSTN/CCN2/COL16A1/CCN1/LOX…
HALLMARK_KRAS_SIGNALING_UP	200	0.752851688988834	1.93779386097316	1e-10	2.73333333333333e-10	9.12280701754386e-11	5821	tags=55%, list=10%, signal=50%	CD37/IL10RA/IKZF1/DOCK2/IRF8/TNFRSF1B/CCND2/PRDM1/IL7R/LAPTM5/TLR8/MAP4K1/LY96/CFH/LAT2/PECAM1/PDCD1LG2/ITGB2/CMKLR1/IL2RG/TRAF1/C3AR1/ETS1/ABCB1/CTSS/HSD11B1/CSF2RA/GYPC/TNFAIP3/MAFB/FCER1G/LCP1/BIRC3/GFPT2/F13A1/CLEC4A/ADGRA2/PRRX1/GPNMB/SPARCL1/AKAP12/TMEM176B/ENG/ADAMDEC1/IL33/ADGRL4/ALDH1A2/CXCL10/ITGBL1/SPON1/TMEM176A/GNG11/TSPAN7/RELN/NRP1/CXCR4/TFPI/WNT7A/EPHB2/RGS16/ST6GAL1/IL1B/ETV1/PLV…
HALLMARK_COMPLEMENT	200	0.751584727982164	1.93453278140499	1e-10	2.73333333333333e-10	9.12280701754386e-11	8036	tags=59%, list=14%, signal=51%	PIK3CG/LCP2/GNG2/PIK3R5/GZMK/CD40LG/WAS/PLEK/C1S/GZMA/LCK/SERPING1/CFH/C3/FYN/SPOCK2/APOBEC3G/GNGT2/C1R/CASP10/CCL5/CTSS/SH2B3/TNFAIP3/C1QA/DOCK10/FCER1G/C1QC/CR1/LRP1/ITGAM/FCN1/ZEB1/F5/CASP4/CASP1/IRF1/GZMB/GP1BA/DPP4/F10/LYN/GNAI2/ITIH1/ZFPM2/TIMP2/PSMB9/OLR1/CTSB/LGMN/CR2/JAK2/C2/APOC1/CTSC/KLK1/PIM1/PLA2G4A/HPCAL4/LAP3/DOCK4/RHOG/LIPA/CASP5/DGKG/PLA2G7/NOTCH4/CTSH/KYNU/FN1/MMP14/CTSO/ERAP2/C…
HALLMARK_TNFA_SIGNALING_VIA_NFKB	199	0.748357522375478	1.92690768851175	1e-10	2.73333333333333e-10	9.12280701754386e-11	8005	tags=67%, list=14%, signal=58%	PLEK/IL7R/PTGER4/CD69/TNFRSF9/TRAF1/GPR183/CCL5/TNFAIP8/IL12B/TNFAIP3/MSC/CCL4/CCRL2/BIRC3/GFPT2/IL15RA/IRF1/CD83/EGR2/PLPP3/CD80/IL18/SLC2A3/PTPRE/SGK1/CSF1/CXCL11/OLR1/CXCL10/BCL2A1/GEM/CCL2/TLR2/CFLAR/ICAM1/SERPINB8/FUT4/KLF2/NR4A3/ZFP36/ABCA1/RNF19B/CCN1/IL1B/SOCS3/BMP2/TAP1/PLAU/DRAM1/KYNU/SOD2/TNFAIP6/STAT5A/SPSB1/DUSP1/RELB/KLF4/TNFSF9/CSF2/FOS/TNC/IL6/NFKBIE/SERPINE1/SLC2A6/NFKB1/NFKB2/G0…
HALLMARK_IL2_STAT5_SIGNALING	198	0.724728821051693	1.86449933403001	1e-10	2.73333333333333e-10	9.12280701754386e-11	9743	tags=62%, list=17%, signal=51%	CCR4/IL10RA/IRF8/CD48/FGL2/CST7/TNFRSF1B/CCND2/EOMES/IRF4/GPR65/IL2RB/TNFRSF9/TLR7/SYT11/TNFRSF8/SELL/IL18R1/CD86/TRAF1/ICOS/CTLA4/ABCB1/ADAM19/GBP4/IL2RA/LTB/SELP/IL10/CD79B/LRRC8C/CD83/SHE/BATF3/IL3RA/IL4R/TGM2/SLC2A3/PTGER2/TNFRSF4/CSF1/IL1RL1/TNFSF11/CXCL10/PTH1R/GLIPR2/NT5E/PRKCH/SOCS1/F2RL2/PLAGL1/COL6A1/NRP1/ITIH5/CDC42SE2/HOPX/PIM1/RORA/FLT3LG/CAPN3/RGS16/SCN9A/PLPP1/CTSZ/BMP2/GALM/IL1R2/…
HALLMARK_COAGULATION	138	0.703502261184861	1.79865566986757	1e-10	2.73333333333333e-10	9.12280701754386e-11	10283	tags=59%, list=18%, signal=48%	PLEK/C1S/SERPING1/CFH/PECAM1/C3/FYN/C1R/C1QA/CTSK/LRP1/A2M/MMP2/VWF/GP1BA/DPP4/F10/FBN1/PROS1/ITIH1/OLR1/CFI/CTSB/LGMN/HTRA1/ANXA1/F2RL2/C2/APOC1/GSN/MMP3/SPARC/PLAU/MEP1A/ISCU/BMP1/CTSH/FN1/THBD/MMP14/CTSO/KLF7/PROC/P2RY1/SERPINE1/SERPINA1/MMP9/COMP/MMP7/TFPI2/TIMP3/CAPN5/MMP11/ITGB3/CFD/F3/LEFTY2/CTSE/DCT/MBL2/TIMP1/DUSP6/RAPGEF3/PRSS23/MMP10/CFB/MASP2/THBS1/CPQ/MMP1/C9/WDR1/GDA/GNG12/CASP9/F8/…
HALLMARK_UV_RESPONSE_DN	144	0.698442282219583	1.78531870951583	1e-10	2.73333333333333e-10	9.12280701754386e-11	6799	tags=42%, list=12%, signal=37%	PIK3CD/CELF2/TGFBR2/FYN/SYNE1/DAB2/HAS2/PLPP3/FBLN5/PRKCA/CAV1/PDGFRB/PTPRM/GRK5/COL3A1/AKT3/SNAI2/COL1A2/NRP1/COL1A1/TFPI/COL5A2/NR3C1/DLC1/CCN1/ADD3/PTGFR/PPARG/PRDM2/ATXN1/DUSP1/RGS4/LPAR1/SERPINE1/NFKB1/ACVR2A/ID1/EFEMP1/ADGRL2/AMPH/PTPN21/KIT/ITGB3/LAMC1/PMP22/F3/RUNX1/CACNA1A/RASA2/COL11A1/SMAD7/ATP2B4/MGLL/MAP1B/KCNMA1/MET/IGFBP5/TGFBR3/RND3/SCHIP1/MMP16
HALLMARK_MYOGENESIS	198	0.663997473455175	1.70825667628096	1e-10	2.73333333333333e-10	9.12280701754386e-11	8022	tags=49%, list=14%, signal=42%	LSP1/MEF2C/IGF1/TGFB1/COL15A1/IGFBP7/LAMA2/COL6A3/ADAM12/FHL1/PKIA/PTGIS/COL3A1/MYH1/APLNR/GJA5/COL6A2/SSPN/MYH4/MYLK/GSN/COL1A1/AEBP1/SPARC/PYGM/GPX3/BIN1/MYH8/ACHE/MYH2/DENND2B/TNNT3/TAGLN/SOD3/SGCG/SGCD/KIFC3/MYH11/PDLIM7/TNNI2/NCAM1/FST/FGF2/MYBPC3/MRAS/CHRNA1/MYH3/IGFBP3/MYH7/MYL3/MYH9/SPHK1/SORBS1/DMD/APOD/CD36/WWTR1/CASQ2/NOTCH1/MYL2/HBEGF/COX7A1/ITGA7/GADD45B/CFD/PRNP/GNAO1/COL4A2/ACTN3/A…
HALLMARK_APICAL_JUNCTION	198	0.655216148486064	1.68566508880546	1e-10	2.73333333333333e-10	9.12280701754386e-11	7971	tags=47%, list=14%, signal=41%	PTPRC/FYB1/PECAM1/CD86/TRAF1/VCAM1/RAC2/ADAM23/MMP2/SLIT2/ICAM2/CD274/VWF/CADM3/CD209/LAYN/NEXN/FBN1/GNAI2/SIRPA/CDH11/EPB41L2/JAM3/SYK/THY1/NRXN2/CD34/VCAN/AKT3/ICAM1/ARPC2/CLDN11/MSN/CNN2/NECTIN3/FLNC/COL16A1/NEGR1/SKAP2/ZYX/COL17A1/BMP1/CAP1/CLDN5/CNTN1/TSPAN4/ADAMTS5/RHOF/CLDN19/SDC3/TGFBI/MYL9/CLDN14/MMP9/CD99/CLDN15/CX3CL1/MAPK11/MYH9/ARHGEF6/ITGA9/PARVA/ALOX15B/ACTN1/NLGN3/CERCAM/EGFR/FSCN…
HALLMARK_APOPTOSIS	161	0.655460192324119	1.68110870542205	3.7252122718851e-10	9.54585644670557e-10	3.18603681148068e-10	6745	tags=45%, list=12%, signal=40%	CD2/CCND2/CD69/PLCB2/FASLG/PRF1/HGF/DPYD/CD38/DCN/FAS/BIRC3/MMP2/CASP4/F2R/CASP1/IRF1/LUM/IL18/CAV1/TIMP2/PDGFRB/FEZ1/ANXA1/CYLD/CFLAR/LEF1/CD14/GSN/BGN/GPX3/TXNIP/IL1B/HMOX1/BMP2/TAP1/IFNGR1/SOD2/IGFBP6/PLPPR4/NEDD9/SATB1/IL6/ANKH/AVPR1A/NEFH/TNF/EGR3/SAT1/EMP1/CASP8/TIMP3/ATF3/CASP7/LGALS3/ISG20/BMF/GADD45B/IL1A/CCNA1/SMAD7/RNASEL/MCL1/BTG2/TGFB2/PEA15/JUN/TNFSF10/TIMP1/TGFBR3/GADD45A/IGF2R/GCH1
HALLMARK_KRAS_SIGNALING_DN	200	0.598244230458373	1.53984378875723	1.97070093383562e-07	4.75286695807414e-07	1.58632273311846e-07	12431	tags=51%, list=22%, signal=40%	CD40LG/PDCD1/IL12B/SLC12A3/CCR8/TCL1A/IFNG/GP1BA/CD80/SYNPO/SGK1/SLC16A7/CHST2/SHOX2/KCND1/MEFV/ITIH3/KCNMB1/FGF16/PTGFR/WNT16/DCC/NRIP2/COPZ2/PTPRJ/ARPP21/TENT5C/TENM2/MAST3/RSAD2/CD207/TG/ABCB11/MYH7/VPREB1/IFI44L/EDN1/RYR2/ZBTB16/OXT/EDAR/CAMK1D/PLAG1/NUDT11/CLDN16/KCNN1/KRT1/NOS1/SLC30A3/CCNA1/CLSTN3/BTG2/TGFB2/STAG3/TFAP2B/RYR1/TSHB/MTHFR/UGT2B17/PRKN/PAX3/KRT5/PRODH/SLC29A3/ENTPD7/SLC6A3/PK…
HALLMARK_HYPOXIA	199	0.575074347874747	1.48072966363496	5.4957081387931e-06	1.25180018716954e-05	4.17802373124621e-06	9218	tags=42%, list=16%, signal=35%	ETS1/PLAC8/TNFAIP3/DCN/AKAP12/TGM2/SLC2A3/PRKCA/CAV1/CAVIN1/CHST2/SRPX/S100A4/SLC6A6/CXCR4/PIM1/RORA/COL5A1/NR3C1/AMPD3/BGN/SLC2A5/ZFP36/PYGM/CCN2/CCN5/CCN1/LOX/HMOX1/TPST2/TKTL1/TGFB3/DUSP1/KLF7/FOS/IL6/SERPINE1/SDC3/TGFBI/NDST2/LXN/IDS/HAS1/IGFBP3/MYH9/HS3ST1/KLF6/NAGK/CHST3/CAVIN3/GLRX/EGFR/ATF3/PPP1R15A/PNRC1/ISG20/PLAUR/F3/PGF/BTG1/PCK1/PPARGC1A/JUN/HEXA/GPC3/ACKR3/XPNPEP1/DPYSL4/WSB1/PKP1/P…
HALLMARK_P53_PATHWAY	199	0.571267548317159	1.47092772924288	9.65631768024363e-06	2.08373170994731e-05	6.95468863397048e-06	8001	tags=39%, list=14%, signal=33%	IRAG2/CCND2/TGFB1/FAS/F2R/CASP1/DGKA/GM2A/PTPRE/TCN2/PLK3/SOCS1/S100A4/IFI30/RGS16/RNF19B/TXNIP/HMOX1/BMP2/CEBPA/TAP1/DEF6/ZMAT3/ISCU/ZFP36L1/DRAM1/KLF4/RAP2B/TNFSF9/ADA/FOS/RRAD/LIF/TP63/SAT1/SPHK1/ZBTB16/FUCA1/ALOX15B/NOTCH1/VDR/CD82/HBEGF/PROCR/ATF3/PPP1R15A/TRAFD1/BTG1/IL1A/UPP1/TSPYL2/CDH13/PITPNC1/VWA5A/TCHH/BTG2/MXD4/CLCA2/ERCC5/CDKN2B/JUN/PTPN14/SESN1/GADD45A/CD81/STOM/RALGDS/RB1/FBXW7/ZN…
HALLMARK_XENOBIOTIC_METABOLISM	199	0.557326553086861	1.43503177030404	4.29364537892096e-05	8.80197302678797e-05	2.93775736452487e-05	10355	tags=41%, list=18%, signal=33%	IRF8/ABCD2/HSD11B1/PTGDS/IGF1/FAS/VNN1/FMO1/TMEM176B/F10/IL1R1/PROS1/ITIH1/PSMB10/AOX1/CDO1/FMO3/FBLN1/ATOH8/APOE/SLC6A6/TPST1/ALDH2/SLC6A12/HMOX1/BCAT1/SLC12A4/MAN1A1/CYP2S1/KYNU/CES1/SLC46A3/CCL25/SERPINE1/ADH1C/GCKR/UPB1/LPIN2/CD36/ETS2/GABARAPL1/TNFRSF1A/CYP26A1/ABCC3/RBP4/LCAT/UPP1/PAPSS2/TGFB2/PDK4/IGFBP4/TYR/CRP/TDO2/MBL2/ITIH4/GCH1/ACP2/ABHD6/PPARD/CFB/CYFIP2/CYP2E1/GSTO1/AP4B1/PINK1/AQP9…
HALLMARK_ANGIOGENESIS	36	0.723830416940176	1.72608974521363	8.59169022922387e-05	0.000167742523522942	5.59859513683761e-05	8001	tags=58%, list=14%, signal=50%	CCND2/FSTL1/LUM/OLR1/COL3A1/VCAN/S100A4/SLCO2A1/NRP1/COL5A2/POSTN/THBD/KCNJ8/LPL/CXCL6/ITGAV/JAG1/MSX1/TIMP1/FGFR1/PDGFA
HALLMARK_APICAL_SURFACE	44	0.657728524827918	1.59546922106586	0.00111990642155182	0.00208709833107384	0.000696592511013091	8000	tags=48%, list=14%, signal=41%	IL2RB/IL2RG/MAL/LYN/GAS1/THY1/SRPX/GHRL/MDGA1/CX3CL1/CD160/PKHD1/PLAUR/NTNG1/AFAP1L2/PCSK9/SLC2A4/SULF2/AKAP7/CRYBG1/SLC22A12
HALLMARK_HEDGEHOG_SIGNALING	36	0.679492265926817	1.62035831144851	0.00138295061747826	0.00246525979637429	0.000822808147698737	12090	tags=61%, list=21%, signal=48%	NRP2/GLI1/THY1/NRP1/RTN1/ACHE/PML/SCG2/DPYSL2/CDK6/MYH9/ETS2/CRMP1/NKX6-1/L1CAM/PTCH1/SLIT1/HEY2/UNC5C/HEY1/RASA1/CNTFR
HALLMARK_TGF_BETA_SIGNALING	54	0.621953944465499	1.53501068474034	0.0016759943326175	0.00286315698488823	0.000955610803685417	13679	tags=63%, list=24%, signal=48%	TGFB1/LTBP2/ENG/ID3/BMP2/SKI/SERPINE1/ACVR1/ID1/TGFBR1/JUNB/WWTR1/NOG/PPP1R15A/RAB31/LEFTY2/IFNGR2/SMAD7/PMEPA1/KLF10/BMPR2/THBS1/SLC20A1/SMAD6/CDKN1C/ID2/RHOA/SMURF2/TJP1/SKIL/CTNNB1/FKBP1A/SPTBN1/CDK9
HALLMARK_ANDROGEN_RESPONSE	100	0.543136596544434	1.38200024053079	0.00666202556666038	0.010925721929323	0.00364658241543516	9517	tags=43%, list=17%, signal=36%	MAF/TNFAIP8/B2M/PTK2B/AKAP12/SGK1/RPS6KA3/MERTK/KLK2/PLPP1/ABCC4/CDK6/ANKH/ARID5B/HPGD/CDC14B/ALDH1A3/SAT1/ADAMTS1/UBE2J1/ACTN1/GUCY1A1/PTPN21/ITGAV/FKBP5/KLK3/IQGAP2/HERC3/MYL12A/PMEPA1/SPCS3/PIAS1/ELL2/DNAJB9/ELK4/CCND3/SELENOP/SEC24D/STEAP4/SRF/MAK/LIFR/HSD17B14
HALLMARK_WNT_BETA_CATENIN_SIGNALING	42	0.606317716088938	1.46441199503543	0.0149453822660134	0.0235677181887134	0.00786599066632282	8706	tags=48%, list=15%, signal=40%	CCND2/WNT1/TCF7/LEF1/NOTCH4/DLL1/NKD1/WNT5B/NOTCH1/JAG1/FZD1/PTCH1/NUMB/PPARD/MAML1/RBPJ/AXIN2/WNT6/DKK1/GNAI1
HALLMARK_BILE_ACID_METABOLISM	112	0.507735721409372	1.29715163214407	0.026973026973027	0.040959040959041	0.0136705399863295	9772	tags=31%, list=17%, signal=26%	LCK/ABCD2/ABCA6/ALDH1A1/HSD17B11/ABCA9/CH25H/ACSL5/ABCA8/BMP6/PIPOX/DIO2/ABCA1/SULT1B1/CYP7B1/SOAT2/ATXN1/OPTN/CYP7A1/LIPE/HSD17B6/CYP8B1/NEDD4/NR3C2/AGXT/ACSL1/BBOX1/PAOX/AQP9/CAT/SLCO1A2/CROT/CYP27A1/AKR1D1/RXRG
HALLMARK_PI3K_AKT_MTOR_SIGNALING	105	0.496996452625904	1.26697634612589	0.046953046953047	0.068752675895533	0.0229469778341959	11107	tags=34%, list=20%, signal=28%	PRKCB/CAMK4/SLA/LCK/FASLG/IL2RG/STAT2/NOD1/RPS6KA3/CXCR4/MKNK1/DAPP1/RALB/MYD88/CAB39/ACTR3/PITX2/EGFR/TNFRSF1A/ADCY2/PLCG1/GRK2/GNA14/PIKFYVE/NCK1/ACTR2/RIPK1/IRAK4/PLCB1/PTEN/RPS6KA1/TIAM1/NGF/MAP2K6/PFN1/CDKN1A
