# Supplementary material for: Integrated bulk RNA and single-cell RNA sequencing to identify and validate exercise-related genes for predicting the prognosis of invasive ductal carcinoma
Source: Research Square preprint supplement (doi:10.21203/rs.3.rs-8444169/v1), 2026-01-16
Supplement: Supplementary file 19 [file f822d62b69f910ed841516a5.xlsx]

## Sheet: Supplementary Table 11
Gene set enrichment analysis (GSEA) pathways for CALM2
ID	Description	setSize	enrichmentScore	NES	pvalue	p.adjust	qvalue	rank	leading_edge	core_enrichment
HALLMARK_E2F_TARGETS	HALLMARK_E2F_TARGETS	200	0.796050999593483	3.6868086146014	1e-10	7.14285714285714e-10	1.80451127819549e-10	5016	tags=68%, list=9%, signal=62%	MSH2/UBE2T/CKS1B/RRM2/HMGB3/DONSON/STMN1/DLGAP5/SMC6/MTHFD2/PTTG1/RFC2/SPC25/CDK1/CCNB2/MELK/H2AZ1/PRIM2/CHEK1/EZH2/HMMR/SRSF2/SYNCRIP/ANP32E/CDKN3/CKS2/CCNE1/EED/DEK/ASF1A/AURKB/SRSF1/RAD51AP1/DEPDC1/CDCA8/TUBB/MCM6/JPT1/TRA2B/CHEK2/KIF4A/CDC20/BUB1B/RFC3/SPC24/CDCA3/HMGA1/DIAPH3/KIF2C/GINS1/GINS3/AURKA/LBR/PHF5A/ORC6/RPA3/ZW10/PCNA/XPO1/ASF1B/PLK1/KPNA2/CDC25A/BIRC5/TRIP13/EXOSC8/TCF19/PLK4/DSC…
HALLMARK_MYC_TARGETS_V1	HALLMARK_MYC_TARGETS_V1	199	0.722127367706731	3.34352125859884	1e-10	7.14285714285714e-10	1.80451127819549e-10	6161	tags=57%, list=11%, signal=51%	SNRPG/SRSF3/ILF2/CCT4/SSBP1/TARDBP/ACP1/PSMA4/PSMD14/SRSF7/RFC4/YWHAQ/CBX3/HDAC2/LSM2/H2AZ1/MRPL9/SRSF2/SYNCRIP/HSPE1/IFRD1/DEK/SRPK1/HDGF/SRSF1/YWHAE/MCM6/TRA2B/CDC20/SNRPA1/CCT7/CCNA2/HPRT1/HDDC2/CDC45/PCNA/XPO1/KPNA2/COX5A/PSMA1/LDHA/VBP1/CDK2/TFDP1/HNRNPA3/RANBP1/PRDX4/PPIA/PSMB2/EPRS1/SNRPB2/CCT3/PPM1G/ERH/MAD2L1/SERBP1/CTPS1/EIF2S2/TCP1/SSB/DDX18/UBA2/AP3S1/SNRPD1/ODC1/HNRNPU/DUT/NDUFAB1/MC…
HALLMARK_G2M_CHECKPOINT	HALLMARK_G2M_CHECKPOINT	200	0.719627734360927	3.3328640146207	1e-10	7.14285714285714e-10	1.80451127819549e-10	5433	tags=58%, list=10%, signal=53%	TTK/CKS1B/CENPA/NEK2/HMGB3/EXO1/STMN1/DBF4/PTTG1/BUB1/CDK1/CCNB2/KIF23/H2AZ1/KATNA1/PRIM2/CHEK1/NDC80/EZH2/HMMR/SRSF2/CENPF/SYNCRIP/CDKN3/CKS2/UBE2C/AURKB/PBK/SRSF1/MCM6/E2F3/TPX2/JPT1/TRA2B/KIF4A/CDC20/FBXO5/STIL/HMGA1/KIF11/KIF2C/KNL1/KIF15/CCNA2/AURKA/SAP30/LBR/ORC6/EFNA5/CDC45/XPO1/PLK1/KPNA2/CDC25A/BIRC5/PLK4/TFDP1/LMNB1/AMD1/DTYMK/HUS1/BARD1/MAD2L1/ORC5/POLQ/RACGAP1/MCM3/SLC7A5/CDC7/MYBL2/T…
HALLMARK_MTORC1_SIGNALING	HALLMARK_MTORC1_SIGNALING	200	0.625639022967724	2.89756729240478	1e-10	7.14285714285714e-10	1.80451127819549e-10	6955	tags=53%, list=12%, signal=47%	RAB1A/ACTR3/PNO1/PSMA4/RRM2/TES/PSMD14/CACYBP/MTHFD2/UCHL5/BUB1/ACTR2/HSPE1/IFRD1/PHGDH/ENO1/PSMC2/PPA1/CCT6A/PSMG1/IMMT/GMPS/GAPDH/GPI/DAPP1/HPRT1/PSMA3/AURKA/SRD5A1/ERO1A/PSPH/PLK1/PDK1/NFIL3/CDC25A/LDHA/TPI1/MLLT11/ARPC5L/RPN1/PPIA/IDI1/EPRS1/EEF1E1/GLRX/PSAT1/SEC11A/EBP/NAMPT/EIF2S2/SLC7A5/FADS2/VLDLR/SHMT2/DHCR7/RPA1/TFRC/MCM4/RIT1/HSP90B1/PLOD2/PSMC4/ABCF2/PITPNB/DDIT4/PDAP1/PGM1/PSMB5/PNP/…
HALLMARK_OXIDATIVE_PHOSPHORYLATION	HALLMARK_OXIDATIVE_PHOSPHORYLATION	200	0.598113306996835	2.77008545164788	1e-10	7.14285714285714e-10	1.80451127819549e-10	6503	tags=47%, list=11%, signal=42%	MDH1/SUCLG1/ATP5F1C/COX7A2L/FH/CYCS/NDUFB3/ATP5MC3/MGST3/SDHD/ATP5MF/IMMT/NDUFB5/TIMM17A/ATP5PO/GPI/MPC1/SDHC/UQCRH/NDUFB2/COX7A2/MTX2/COX5A/LDHA/ATP5PF/MRPS22/NDUFA4/UQCR10/OAT/DLD/LRPPRC/NDUFS2/NDUFB6/TIMM8B/NDUFA6/MRPL35/NDUFB4/TOMM22/UQCRFS1/IDH2/FDX1/NDUFA9/ATP5MG/ETFA/COX6B1/HSD17B10/NDUFAB1/HADHB/ATP5F1E/COX7B/MRPL11/COX5B/LDHB/MRPL15/SLC25A5/UQCR11/ATP6V1F/NDUFA1/SDHB/ALAS1/DECR1/ATP1B1/P…
HALLMARK_GLYCOLYSIS	HALLMARK_GLYCOLYSIS	199	0.551293344091962	2.55254280356274	1e-10	7.14285714285714e-10	1.80451127819549e-10	7949	tags=45%, list=14%, signal=39%	MDH1/UGP2/KDELR3/CENPA/STMN1/CDK1/KIF20A/HMMR/TXN/ENO1/DEPDC1/PFKP/SDHC/EFNA3/AURKA/SAP30/SLC25A13/ERO1A/HAX1/SOX9/LDHA/TPI1/B3GNT3/PPIA/COPB2/PLOD1/DLD/GLRX/LCT/SDC1/VLDLR/PKM/RPE/DSC2/P4HA2/MIOX/CHST6/ADORA2B/FAM162A/SRD5A3/PLOD2/PSMC4/BPNT1/GFPT1/TGFA/DDIT4/TALDO1/EXT1/P4HA1/CHST4/NANP/NASP/GOT1/GPC4/ME1/ME2/CLDN9/PGK1/PRPS1/CXCR4/RRAGD/ALDH9A1/B4GALT4/PPP2CB/LHX9/NSDHL/TPST1/IDH1/PAM/MET/PPFI…
HALLMARK_ESTROGEN_RESPONSE_EARLY	HALLMARK_ESTROGEN_RESPONSE_EARLY	200	-0.569967	-2.53629	1e-10	7.14285714285714e-10	1.80451127819549e-10	9073	tags=55%, list=16%, signal=46%	DHRS3/TFF1/KRT18/RAPGEFL1/KRT13/ABAT/GAB2/RET/PDZK1/RPS6KA2/OLFML3/SLC1A4/SLC19A2/MICB/ARL3/ESRP2/CXCL12/SCNN1A/RRP12/MYB/SIAH2/WWC1/CISH/NBL1/AKAP1/ELF1/TTC39A/MYC/NADSYN1/PRSS23/PEX11A/FOS/ELOVL5/SEC14L2/SEMA3B/DEPTOR/ASB13/KRT19/SLC27A2/CCN5/CALCR/PLAAT3/TPBG/FKBP4/OLFM1/KLF10/ADCY1/ANXA9/LRIG1/XBP1/SULT2B1/MPPED2/MINDY1/AR/CANT1/P2RY2/BLVRB/FCMR/PTGES/ABCA3/CELSR2/PGR/SLC9A3R1/CBFA2T3/TOB1/SL…
HALLMARK_DNA_REPAIR	HALLMARK_DNA_REPAIR	149	0.494685920396871	2.18669277126859	1.32050184215869e-09	8.2531365134918e-09	2.08500290867161e-09	5916	tags=43%, list=10%, signal=39%	DGUOK/GTF2A2/RFC4/RFC2/RBX1/TAF13/RAD51/RFC3/RALA/HPRT1/RPA3/PCNA/GTF2H5/POLR3C/PDE4B/POLE4/UMPS/FEN1/POLR1H/POLR2D/DUT/SF3A3/VPS37B/POLR3GL/ZWINT/POLR2H/NCBP2/POLR1C/NT5C3A/PNP/POLD3/ALYREF/MPC2/NELFCD/UPF3B/POLR2F/POLH/POLR2I/CETN2/RPA2/POLR2J/SEC61A1/POLR2C/POLR2K/DAD1/CLP1/ADA/CSTF3/STX3/POLA2/RFC5/NELFE/SSRP1/RAE1/ARL6IP1/SAC3D1/POLB/NUDT21/POLR2G/GTF3C5/NME1/SDCBP/GUK1/TYMS
HALLMARK_SPERMATOGENESIS	HALLMARK_SPERMATOGENESIS	134	0.457828482440692	1.9959250116316	5.24965986112233e-07	2.67761512698714e-06	6.76450137344121e-07	7836	tags=32%, list=14%, signal=28%	TTK/NEK2/DBF4/RFC4/BUB1/CDK1/CCNB2/EZH2/NCAPH/CDKN3/PSMG1/RPL39L/CNIH2/KIF2C/AURKA/MLF1/TSN/DMRT1/ACRV1/ART3/GMCL1/PARP2/AGFG1/TALDO1/OAZ3/SCG3/IL12RB2/CRISP2/THEG/VDAC3/ADAD1/LPIN1/ARL4A/TOPBP1/SYCP1/MAP7/DDX25/TCP11/CCNA1/PCSK1N/CSNK2A2/LDHC/DMC1
HALLMARK_MYOGENESIS	HALLMARK_MYOGENESIS	198	-0.425723	-1.88454	5.35523025397429e-07	2.67761512698714e-06	6.76450137344121e-07	10057	tags=38%, list=18%, signal=31%	SGCD/MYH1/CAMK2B/GPX3/MYH4/COL4A2/EIF4A2/COL1A1/SCD/DMPK/AGL/MYOG/MYH3/AEBP1/TCAP/CHRNG/COL6A2/CAV3/CD36/MYL3/CKMT2/SGCA/FHL1/MYOM1/SORBS3/BDKRB2/TNNC1/SPDEF/LDB3/GAA/MEF2C/COL15A1/SORBS1/CDH13/SPTAN1/LSP1/PPP1R3C/ERBB3/PYGM/COL6A3/KCNH1/ATP6AP1/ANKRD2/PFKM/FOXO4/APLNR/SGCG/GNAO1/LARGE1/CLU/ITGA7/SH2B1/PVALB/CASQ2/TGFB1/VIPR1/MEF2D/HDAC5/MYH11/OCEL1/IGF1/ADCY9/HSPB8/TNNT3/CACNG1/LAMA2/AKT2/CASQ1/…
HALLMARK_MITOTIC_SPINDLE	HALLMARK_MITOTIC_SPINDLE	199	0.397475108687044	1.84034913380922	1.30558230866234e-06	5.60487523034726e-06	1.41596847924562e-06	6072	tags=30%, list=11%, signal=27%	TTK/NEK2/ANLN/DLGAP5/BUB1/CDK1/CCNB2/KIF23/KATNA1/NDC80/CENPF/ECT2/YWHAE/TPX2/KIF4A/FBXO5/KIF11/STK38L/KIF2C/KIF15/AURKA/PLK1/BIRC5/LMNB1/ABI1/NCK2/UXT/LRPPRC/RACGAP1/KIFAP3/NCK1/BRCA2/SORBS2/CENPE/MID1/SMC4/ARHGEF2/DLG1/TOP2A/PIF1/CEP57/NET1/RASA2/PRC1/MAPRE1/KIF20B/ESPL1/RASAL2/SASS6/TUBA4A/CDC42EP1/KIF3C/SAC3D1/CD2AP/TUBGCP3/KIF5B/ARL8A/FSCN1/CENPJ
HALLMARK_UNFOLDED_PROTEIN_RESPONSE	HALLMARK_UNFOLDED_PROTEIN_RESPONSE	112	0.481991543307306	2.05447978860564	1.34517005528334e-06	5.60487523034726e-06	1.41596847924562e-06	6409	tags=38%, list=11%, signal=34%	KDELR3/CKS1B/MTHFD2/CEBPB/PDIA5/ERO1A/NFYA/PSAT1/SEC11A/PAIP1/SLC7A5/PDIA6/ALDH18A1/CHAC1/SRPRB/CEBPG/PREB/H2AX/NABP1/HSP90B1/EIF4EBP1/DDIT4/EIF2AK3/POP4/SSR1/DKC1/CALR/EXOSC1/EIF2S1/BANF1/SERP1/FKBP14/ATF4/TARS1/NPM1/XPOT/LSM4/VEGFA/NFYB/KIF5B/IMP3/HSPA5/TUBB2A
HALLMARK_UV_RESPONSE_UP	HALLMARK_UV_RESPONSE_UP	158	0.430204754993308	1.93244424468969	1.7798203313261e-06	6.84546281279269e-06	1.72938007902131e-06	6478	tags=35%, list=11%, signal=31%	EPCAM/BTG3/RFC4/CTSV/CCNE1/GAL/CHRNA5/GGH/BID/RPN1/CDK2/CREG1/AMD1/FEN1/CCK/LHX2/PRPF3/PARP2/AP2S1/HNRNPU/CASP3/CEBPG/CDC5L/H2AX/POLR2H/TFRC/PDAP1/ATP6V1F/CYB5B/SLC6A8/ALAS1/KLHDC3/HLA-F/TYRO3/PPP1R2/CCND3/RAB27A/PSMC3/GLS/TUBA4A/SOD2/TARS1/PPIF/BAK1/POLE3/YKT6/PDLIM3/CDC34/TAP1/PTPRD/DNAJA1/BSG/GCH1/PRKACA/NKX2-5
HALLMARK_ESTROGEN_RESPONSE_LATE	HALLMARK_ESTROGEN_RESPONSE_LATE	200	-0.399137	-1.77612	1.25054755034636e-05	4.466241251237e-05	1.12831357925987e-05	7612	tags=40%, list=13%, signal=35%	PDZK1/SLC2A8/CAV1/SLC29A1/RPS6KA2/SLC1A4/JAK1/MICB/ARL3/CYP4F11/CXCL12/SCNN1A/MYB/SIAH2/CISH/NBL1/TNNC1/PRSS23/CPE/ALDH3A2/FOS/ELOVL5/SEMA3B/KRT19/SLC27A2/CCN5/CALCR/PLAAT3/CXCL14/TPBG/FKBP4/PTPN6/OLFM1/ANXA9/XBP1/SULT2B1/PLXNB1/METTL3/BLVRB/COX6C/LARGE1/PTGES/SORD/ABCA3/CELSR2/BATF/DLG5/PGR/SCUBE2/SLC9A3R1/RABEP1/SERPINA5/PTGER3/TOB1/IL6ST/ASCL1/WFS1/CCND1/AMFR/PRLR/AFF1/FAM102A/HSPB8/FGFR3/NRIP…
HALLMARK_MYC_TARGETS_V2	HALLMARK_MYC_TARGETS_V2	57	0.544934679018135	2.08398030608074	1.44556255909147e-05	4.66406068283827e-05	1.17828901461177e-05	10250	tags=49%, list=18%, signal=40%	MPHOSPH10/CBX3/HSPE1/PLK1/PLK4/TFB2M/NDUFAF4/DDX18/WDR43/MCM4/UNG/NIP7/BYSL/SRM/NPM1/MCM5/MAP3K6/HSPD1/TBRG4/DCTPP1/PA2G4/IMP4/MRTO4/SUPV3L1/DUSP2/PUS1/NOP16/RCL1
HALLMARK_HYPOXIA	HALLMARK_HYPOXIA	199	0.372960099490158	1.72684221235735	1.58577389407273e-05	4.66406068283827e-05	1.17828901461177e-05	8247	tags=34%, list=15%, signal=29%	UGP2/KDELR3/TES/ENO1/PFKP/GAPDH/GPI/EFNA3/SAP30/TMEM45A/ERO1A/PDK1/NFIL3/LDHA/TPI1/ANXA2/PLAUR/GCNT2/GLRX/PNRC1/VLDLR/P4HA2/EDN2/EFNA1/ADORA2B/FAM162A/CP/DDIT4/CSRP2/PLIN2/PGM1/ADM/B4GALNT2/EXT1/PKP1/P4HA1/XPNPEP1/GPC4/PGK1/CXCR4/RRAGD/PPARGC1A/PAM/PPFIA4/VEGFA/HS3ST1/KLHL24/KDM3A/S100A4/SCARB1/PFKFB3/HSPA5/SLC37A4/AK4/GBE1/EGFR/NCAN/LALBA/NAGK/LDHC/ERRFI1/PGM2/HEXA/CHST3/PRDX5/BNIP3L/MT2A
HALLMARK_UV_RESPONSE_DN	HALLMARK_UV_RESPONSE_DN	144	-0.432683	-1.85539	1.58578063216501e-05	4.66406068283827e-05	1.17828901461177e-05	9263	tags=35%, list=16%, signal=29%	AMPH/COL1A1/MGLL/ERBB2/LPAR1/DAB2/MAP2K5/YTHDC1/VAV2/CAV1/GRK5/PRDM2/ATRX/PEX14/MAGI2/SYNJ2/MYC/NIPBL/PLPP3/PRKCE/CITED2/CDON/MMP16/EFEMP1/BDNF/IGFBP5/PPARG/ATXN1/ATRN/DUSP1/SPOP/PTPRM/NR3C1/TOGARAM1/ATP2B1/TGFBR2/PDGFRB/DLC1/SMAD3/RXRA/KCNMA1/ZMIZ1/IGF1R/DBP/INPP4B/APBB2/SYNE1/SMAD7/IRS1/BHLHE40
HALLMARK_ALLOGRAFT_REJECTION	HALLMARK_ALLOGRAFT_REJECTION	200	0.359591485440743	1.66540207466263	0.000105600467427516	0.000293334631743099	7.41055911772039e-05	11639	tags=35%, list=20%, signal=28%	MRPL3/MTIF2/DEGS1/DARS1/UBE2D1/EIF5A/IFNGR2/ABI1/SOCS5/GLMN/NCK1/RIPK2/EREG/IL18/IL12A/HIF1A/CCL7/HLA-A/IFNAR2/IFNGR1/CAPG/HLA-DOB/TAP2/MAP3K7/TLR6/CCND3/RPL39/BCL10/EIF3J/LY75/B2M/NPM1/SOCS1/GALNT1/HLA-G/WARS1/CDKN2A/IL27RA/NME1/TAP1/TGFB2/BCAT1/MBL2/EGFR/IL2RA/CCL13/EIF3D/LYN/UBE2N/IL1B/IL15/GZMB/ABCE1/ICAM1/LIF/DYRK3/IL11/RPS19/IFNG/FAS/C2/CCL2/TLR1/GCNT1/CD47/CCL4/KLRD1/CD80/STAT1/CCR1
HALLMARK_INTERFERON_GAMMA_RESPONSE	HALLMARK_INTERFERON_GAMMA_RESPONSE	199	0.349949247160918	1.62029968622983	0.000172977467551799	0.000455203861978419	0.000114998870394548	11632	tags=35%, list=20%, signal=28%	MTHFD2/PNPT1/PELI1/PFKP/NMI/PSMA3/PSMB2/PDE4B/NUP93/NAMPT/RIPK2/CASP3/HIF1A/LY6E/CCL7/VAMP8/HLA-A/IFNAR2/CXCL10/PNP/IFIH1/HLA-B/BPGM/CXCL11/UPP1/LYSMD2/PLSCR1/IDO1/RTP4/PSMB8/SOD2/CASP1/B2M/SOCS1/METTL7B/PSMB9/EIF2AK2/HLA-G/WARS1/CASP8/ARL4A/TAP1/SECTM1/TRIM26/CMPK2/GCH1/SSPN/IFI44/PTPN2/IL15/RSAD2/MT2A/ICAM1/PLA2G4A/IL15RA/MYD88/PIM1/FAS/CCL2/CD274/OAS2/PTGS2/BATF2/IRF1/PSME2/APOL6/USP18/SAMD9L/…
HALLMARK_TNFA_SIGNALING_VIA_NFKB	HALLMARK_TNFA_SIGNALING_VIA_NFKB	199	0.34140394146022	1.58073407419348	0.000347663309518398	0.000869158273795996	0.000219576827064252	10339	tags=36%, list=18%, signal=30%	BTG3/CCL20/PHLDA2/CEBPB/RCAN1/NFIL3/IFNGR2/PLAUR/PDE4B/PNRC1/NAMPT/PANX1/RIPK2/EFNA1/MCL1/IL18/TANK/FOSL1/BCL2A1/IL1A/CXCL10/EDN1/IFIH1/SAT1/FUT4/IL23A/SLC2A6/KYNU/CXCL11/MXD1/SERPINB2/SERPINB8/CXCL1/B4GALT5/NFKBIE/PLAU/SPSB1/PMEPA1/SOD2/MAP2K3/VEGFA/LAMB3/DNAJB4/TAP1/NFE2L2/PFKFB3/CXCL3/TUBB2A/GCH1/CD83/CFLAR/PTX3/SPHK1/IL1B/TNFAIP8/ID2/CSF2/BIRC2/YRDC/GADD45A/ICAM1/DUSP2/IL15RA/B4GALT1/LIF/LITA…
HALLMARK_FATTY_ACID_METABOLISM	HALLMARK_FATTY_ACID_METABOLISM	157	0.370468244106541	1.6623855182779	0.000463006451837091	0.00110239631389784	0.000278500121405769	6900	tags=30%, list=12%, signal=26%	MDH1/SUCLG1/PTS/CBR3/FH/H2AZ1/YWHAH/SDHD/S100A10/SDHC/ACAT2/LDHA/IDI1/PRDX6/DLD/ODC1/HSD17B10/CPOX/HADHB/UROS/OSTC/MCEE/SMS/DECR1/PDHA1/HIBCH/ME1/ADSL/ALDH9A1/HCCS/BCKDHB/NSDHL/TP53INP2/AADAT/IDH1/CA6/MDH2/CBR1/CEL/ACAA2/LGALS1/HSP90AA1/SDHA/EHHADH/TDO2/HSPH1/HMGCS1
HALLMARK_HEME_METABOLISM	HALLMARK_HEME_METABOLISM	199	-0.346008	-1.53842	0.000902916798173248	0.00205208363221193	0.00051842112813775	7955	tags=31%, list=14%, signal=26%	HBD/EPB42/RAD23A/TMEM9B/ALDH6A1/HBZ/MARCHF2/H1-0/FOXJ2/GAPVD1/KAT2B/FN3K/SLC22A4/ARHGEF12/RANBP10/ALAD/FECH/GYPE/PSMD9/CLCN3/ALDH1L1/CROCCP2/LMO2/CTNS/TRAK2/TSPO2/HAGH/VEZF1/PIGQ/TENT5C/KHNYN/SEC14L1/HBB/DCAF11/TSPAN5/BLVRB/BMP2K/NR3C1/NUDT4/ACKR1/ANK1/LRP10/MARCHF8/EPOR/BTG2/RBM5/HEBP1/ATP6V0A1/SLC25A38/EPB41/NFE2L1/BCAM/BTRC/TAL1/SIDT2/GATA1/ABCG2/ADD1/TNS1/RNF123/EZH1
HALLMARK_ADIPOGENESIS	HALLMARK_ADIPOGENESIS	200	0.321523240161818	1.4890938548265	0.0021962669911581	0.00477449345903935	0.00120618782123099	6823	tags=30%, list=12%, signal=26%	PPM1B/SUCLG1/COQ3/ATL2/MGST3/MTCH2/IMMT/ATP5PO/PTCD3/SDHC/CMPK1/SLC5A6/UQCR10/DLD/DNAJC15/NDUFAB1/DHCR7/COX7B/PREB/ORM1/DRAM2/JAGN1/TANK/NABP1/MRPL15/TALDO1/UQCR11/PLIN2/AK2/PGM1/SDHB/IFNGR1/DECR1/HIBCH/PHYH/DLAT/SQOR/UQCRQ/ME1/MCCC1/NDUFS3/COX8A/NDUFA5/ATP1B3/IDH1/CHCHD10/RETN/MDH2/ACAA2/SCARB1/SAMM50/ARL4A/PFKFB3/MAP4K3/GBE1/RIOK3/SSPN/YWHAG/SLC25A10
HALLMARK_PI3K_AKT_MTOR_SIGNALING	HALLMARK_PI3K_AKT_MTOR_SIGNALING	105	0.370395825606073	1.56207458155675	0.00357431584066316	0.00744649133471493	0.00188121886350693	7311	tags=29%, list=13%, signal=25%	ACTR3/CDK1/ACTR2/CSNK2B/PFN1/DAPP1/RAC1/PDK1/ARPC3/CDK2/ARF1/NCK1/AP2M1/RIT1/HSP90B1/CFL1/PPP2R1B/CALR/MAP3K7/PIK3R3/SFN/CXCR4/E2F1/MAP2K3/MAPKAP1/RALB/EGFR/PPP1CA/UBE2N/GSK3B
HALLMARK_CHOLESTEROL_HOMEOSTASIS	HALLMARK_CHOLESTEROL_HOMEOSTASIS	74	0.421877860121676	1.6839070626101	0.00381016832127584	0.00762033664255169	0.00192513767811832	4278	tags=27%, list=8%, signal=25%	S100A11/ACAT2/FDPS/NFIL3/LGALS3/PLAUR/IDI1/PNRC1/EBP/FADS2/DHCR7/ANXA5/TNFRSF12A/FABP5/GPX8/CXCL16/MAL2/PLSCR1/CBS/NSDHL
HALLMARK_INFLAMMATORY_RESPONSE	HALLMARK_INFLAMMATORY_RESPONSE	199	0.308881253014117	1.43015080444197	0.00435824301977127	0.00838123657648322	0.00211736502984839	7322	tags=24%, list=13%, signal=21%	CCL20/NMI/IFNGR2/ABI1/CXCL8/PLAUR/ATP2C1/PDE4B/ITGB8/NAMPT/RIPK2/CD55/GNAI3/EREG/IL18/ADORA2B/CD82/HIF1A/OPRK1/LY6E/IL1A/CCL7/CXCL10/EDN1/ADM/SLC31A1/DCBLD2/CXCL11/RNF144B/MARCO/AHR/MXD1/AQP9/RTP4/ROS1/TNFSF15/PVR/MET/EIF2AK2/LAMP3/CX3CL1/SELENOS/CLEC5A/GCH1/PROK2/LYN/SPHK1/IL1B
HALLMARK_APICAL_JUNCTION	HALLMARK_APICAL_JUNCTION	198	-0.325425	-1.44055	0.00467712933260599	0.00866135061593702	0.00218813068192093	8427	tags=31%, list=15%, signal=27%	EPB41L2/FBN1/COL17A1/PLCG1/IKBKG/GNAI2/CERCAM/NEGR1/ITGA2/VAV2/SHROOM2/NF1/SKAP2/STX4/TSPAN4/AMIGO1/CLDN15/LAYN/MADCAM1/KRT31/SORBS3/AMIGO2/GAMT/TRO/CLDN11/CLDN19/CDH6/GTF2F1/MYH10/CADM3/TMEM8B/RASA1/RHOF/NECTIN2/NLGN3/COL16A1/SYMPK/INPPL1/BAIAP2/FLNC/CLDN5/ADAM23/NLGN2/LIMA1/PECAM1/NRXN2/ARHGEF6/TSC1/EVL/CD34/PCDH1/CADM2/AKT2/SLIT2/LAMA3/JAM3/TAOK2/ITGA3/IRS1/VWF/WNK4/PKD1
HALLMARK_REACTIVE_OXYGEN_SPECIES_PATHWAY	HALLMARK_REACTIVE_OXYGEN_SPECIES_PATHWAY	49	0.461473520629949	1.72094459782919	0.00489222604643077	0.00873611794005495	0.00220701926906651	5910	tags=31%, list=10%, signal=27%	TXN/PFKP/GLRX2/MGST1/LAMTOR5/PRDX4/PRDX6/GLRX/NDUFS2/NDUFA6/NDUFB4/PRDX1/SOD2/SELENOS/PRNP
HALLMARK_P53_PATHWAY	HALLMARK_P53_PATHWAY	199	0.304800108848822	1.41125470260968	0.00531022185308793	0.00915555491911713	0.00231298229535591	5842	tags=25%, list=10%, signal=22%	TPRKB/PERP/STEAP3/S100A10/NUDT15/PCNA/SERPINB5/RAP2B/TRIAP1/SDC1/TM4SF1/CD82/TM7SF3/TPD52L1/FAM162A/LDHB/IL1A/ST14/VAMP8/TGFA/DDIT4/ITGB4/DNTTIP2/SAT1/FGF13/EI24/UPP1/POLH/MXD1/SEC61A1/SFN/CCND3/PTPN14/EPHA2/ADA/TNNI1/APP/HINT1/CTSD/KRT17/CASP1/SOCS1/KLK8/BAK1/CDKN2A/S100A4/CLCA2/RPS12/TAP1
HALLMARK_BILE_ACID_METABOLISM	HALLMARK_BILE_ACID_METABOLISM	112	-0.376526	-1.54394	0.00552057088299895	0.00920095147166491	0.00232445089810482	8465	tags=36%, list=15%, signal=30%	SERPINA6/CAT/EFHC1/HSD17B4/HSD17B11/SLC29A1/RXRG/SLC23A1/PIPOX/SLC23A2/CH25H/PEX11A/DHCR24/SLC27A2/SLC27A5/ABCD3/ABCA1/PEX11G/ALDH1A1/NUDT12/ATXN1/PEX12/SULT2B1/PFKM/ISOC1/MLYCD/FDXR/AR/AMACR/DIO1/ABCA3/BCAR3/ABCA9/ABCA5/ABCA6/NR3C2/RXRA/ABCA2/LIPE/ABCA8
HALLMARK_PROTEIN_SECRETION	HALLMARK_PROTEIN_SECRETION	96	0.365219490007944	1.51591198318032	0.00910184472546634	0.0146803947184941	0.00370873129730377	6851	tags=29%, list=12%, signal=26%	ANP32E/VPS45/BET1/ZW10/GNAS/COPB2/ARFGAP3/ARF1/AP3S1/AP2S1/AP2M1/RAB9A/SCAMP3/CLTA/DNM1L/BNIP3/SEC22B/STAM/VAMP7/RAB22A/PAM/YKT6/ARCN1/STX7/CTSC/SSPN/EGFR/LAMP2
HALLMARK_COMPLEMENT	HALLMARK_COMPLEMENT	200	0.299921983130889	1.38905038958556	0.0125279790749052	0.0195749673045394	0.00494525489798891	8329	tags=28%, list=15%, signal=24%	CTSV/CEBPB/PFN1/RABIF/LGALS3/S100A9/PREP/PLAUR/FDX1/PRSS3/CD55/GNAI3/CASP3/ANXA5/GNB4/S100A13/MT3/PPP4C/CP/ACTN2/SCG3/MMP8/KYNU/XPNPEP1/ME1/CSRP1/SERPINB2/GCA/PLSCR1/LTF/CXCL1/PPP2CB/CTSD/CASP1/DGKG/PSMB9/PLG/MMP12/L3MBTL4/HSPA5/USP16/ADRA2B/MMP13/PLA2G7/CTSC/LAMP2/LYN/MMP15/CASP5/CD59/PDP1/GZMB/DUSP6/ATOX1/GMFB
HALLMARK_XENOBIOTIC_METABOLISM	HALLMARK_XENOBIOTIC_METABOLISM	199	-0.306788	-1.36404	0.0129711336000294	0.0196532327273172	0.00496502721532225	10949	tags=34%, list=19%, signal=27%	AOX1/PTGDS/CROT/LONP1/NFS1/CYP4F2/MARCHF6/TAT/LPIN2/BCAR1/SERPINA6/CAT/SLC35D1/CYP1A2/DHRS7/DCXR/IL1R1/UGDH/RBP4/IRF8/SLC46A3/SLC12A4/ALDH2/GSTA3/PTGR1/ASL/CD36/ACSM1/NINJ1/SLC6A12/MPP2/CYP2S1/CDA/ELOVL5/CYP26A1/ETFDH/ACO2/TKFC/ABHD6/CDO1/ACOX3/F10/MCCC2/ITIH4/TMBIM6/ABCC3/ATOH8/DHPS/BLVRB/CYP17A1/ENTPD5/PTGES/ADH1C/PDK4/CYFIP2/CSAD/IGF1/CYP2E1/NMT1/MAN1A1/ESR1/SLC6A6/MAOA/VTN/PINK1/IGFBP4/FBP1
HALLMARK_INTERFERON_ALPHA_RESPONSE	HALLMARK_INTERFERON_ALPHA_RESPONSE	97	0.334833519356437	1.39141730702964	0.0274826514754222	0.0404156639344444	0.0102102729939649	7906	tags=27%, list=14%, signal=23%	PNPT1/NMI/PSMA3/NCOA7/RIPK2/LY6E/CXCL10/IFIH1/CXCL11/PLSCR1/RTP4/PSMB8/CASP1/B2M/PSMB9/EIF2AK2/LAMP3/WARS1/CASP8/HLA-C/TAP1/TRIM26/CMPK2/IFI44/IL15/RSAD2
HALLMARK_NOTCH_SIGNALING	HALLMARK_NOTCH_SIGNALING	32	0.466444550108518	1.56560029744346	0.0306443132177081	0.0437775903110115	0.0110596017627819	5058	tags=41%, list=9%, signal=37%	RBX1/ST3GAL6/SAP30/FZD1/PSENEN/APH1A/CUL1/TCF7L2/DTX2/FZD7/MAML2/PPARD/DTX4
HALLMARK_KRAS_SIGNALING_UP	HALLMARK_KRAS_SIGNALING_UP	200	0.279937759832281	1.2964960097141	0.0424813744867978	0.0574966828836798	0.0145254777811402	10136	tags=30%, list=18%, signal=25%	MPZL2/TMEM158/SLPI/CCL20/ETV4/KCNN4/MYCN/ERO1A/GALNT3/SOX9/TOR1AIP2/PLEK2/BTBD3/PLAUR/GLRX/AMMECR1/STRN/EREG/PRELID3B/CXCL10/ALDH1A3/SCG3/BTC/BPGM/IL1RL2/DCBLD2/TNNT2/ZNF639/CXCR4/TRIB2/PSMB8/PLAU/GABRA3/ADAM17/ATG10/ZNF277/GPRC5B/SPP1/RETN/USH1C/MAP7/PRKG2/ETV5/PTBP2/PCSK1N/PDCD1LG2/IL1B/ST6GAL1/DUSP6/ID2/CSF2/PCP4/WDR33/YRDC/PPBP/SNAP91/LIF/ADAM8/CCSER2/BIRC3/SDCCAG8
HALLMARK_PEROXISOME	HALLMARK_PEROXISOME	104	0.320840084633376	1.34713086955871	0.0436373000389572	0.0574966828836798	0.0145254777811402	7069	tags=27%, list=12%, signal=24%	PEX13/MSH2/CRABP1/YWHAH/ITGB1BP1/GNPAT/FDPS/PEX11B/NUDT19/IDI1/CTPS1/IDH2/TOP2A/CNBP/FABP6/SIAH1/ALDH9A1/PRDX1/BCL10/SOD2/IDH1/CEL/CACNA1B/EHHADH/CLN6/TSPO/CADM1/SLC35B2
HALLMARK_KRAS_SIGNALING_DN	HALLMARK_KRAS_SIGNALING_DN	200	-0.289563	-1.28853	0.0436974789915966	0.0574966828836798	0.0145254777811402	7295	tags=22%, list=13%, signal=19%	HSD11B2/SCGB1A1/P2RX6/MTHFR/EPHA5/COQ8A/GAMT/CNTFR/COL2A1/IRS4/RGS11/GP2/LFNG/EFHD1/FGF22/PROP1/TENT5C/GP1BA/CPEB3/STAG3/ITIH3/CELSR2/SPHK2/P2RY4/SLC29A3/ADRA2C/BRDT/KRT1/SIDT1/BTG2/IDUA/TAS2R4/CCDC106/FGFR3/CACNG1/SELENOP/MAST3/THRB/CPB1/NRIP2/PDK2/ZBTB16/KMT2D
