# Supplementary material for: Integrated bulk RNA and single-cell RNA sequencing to identify and validate exercise-related genes for predicting the prognosis of invasive ductal carcinoma
Source: Research Square preprint supplement (doi:10.21203/rs.3.rs-8444169/v1), 2026-01-16
Supplement: Supplementary file 20 [file f962380fe60b6c753fd25e13.xlsx]

## Sheet: Supplementary Table 12
Gene set enrichment analysis (GSEA) pathways for PHKA1
ID	setSize	enrichmentScore	NES	pvalue	p.adjust	qvalue	rank	leading_edge	core_enrichment
HALLMARK_ALLOGRAFT_REJECTION	200	-0.754232	-3.42918	1e-10	2.77777777777778e-10	4.67836257309942e-11	6380	tags=71%, list=11%, signal=63%	ST8SIA4/TLR2/CCL7/ITGAL/CFP/CCR1/PTPN6/TNF/IFNGR1/TGFB2/FYB1/NOS2/PTPRC/BCL3/PF4/WARS1/IL10/IL11/LY75/CDKN2A/BCAT1/CTSS/IL7/CXCL13/KRT1/IL12B/B2M/GPR65/IL15/IL12A/CXCL9/IFNGR2/FASLG/FAS/IRF7/RPL39/TAPBP/IGSF6/STAB1/NLRP3/IRF8/EIF3D/IL18RAP/IFNG/CD28/TAP2/FLNA/CD86/RPS3A/EGFR/IL27RA/MMP9/IL4R/CCR2/STAT4/GBP2/ICAM1/ITK/TRAF2/IRF4/IL2/IL2RA/HLA-DOA/CSF1/EIF5A/PRKCB/LYN/LCP2/CD3G/IL2RB/KLRD1/CD8A/LIF…
HALLMARK_EPITHELIAL_MESENCHYMAL_TRANSITION	200	-0.721494	-3.28033	1e-10	2.77777777777778e-10	4.67836257309942e-11	7636	tags=66%, list=13%, signal=58%	SPOCK1/FMOD/MXRA5/SGCG/FBN1/FSTL3/COL4A1/FAP/IGFBP4/LAMA1/FERMT2/WNT5A/SCG2/FGF2/GPC1/ANPEP/CXCL6/COL5A2/ECM2/TNFRSF11B/CDH11/TNC/TPM1/SLIT3/COL6A3/DAB2/ADAM12/TPM4/SERPINE1/DKK1/GADD45A/COL7A1/LRRC15/COL3A1/MATN2/TGM2/PDGFRB/MYLK/CALD1/BASP1/SNTB1/ABI3BP/COL1A2/GEM/IL15/COLGALT1/VCAM1/FAS/NT5E/TNFAIP3/MMP1/PMEPA1/LOX/LRP1/FLNA/SPARC/PMP22/COL5A1/LUM/PRRX1/MSX1/COL5A3/CXCL1/COL8A2/LOXL2/COL4A2/PC…
HALLMARK_TNFA_SIGNALING_VIA_NFKB	199	-0.639505	-2.90838	1e-10	2.77777777777778e-10	4.67836257309942e-11	8254	tags=59%, list=15%, signal=50%	TAP1/F3/RNF19B/NR4A3/EFNA1/NINJ1/BIRC3/SERPINB8/PDE4B/DUSP1/PLPP3/ICOSLG/KLF6/FOSB/MAP3K8/IER5/TLR2/PER1/TNF/FJX1/EGR1/SOD2/BTG1/CXCL6/KLF4/HBEGF/TNC/BCL3/STAT5A/TNFAIP6/MAP2K3/SERPINE1/FOS/CD83/GADD45A/MAFF/LAMB3/CCRL2/BTG3/MARCKS/CSF2/PTGS2/SGK1/ETS2/IL12B/GEM/CXCL10/EGR2/FUT4/IFNGR2/CXCL11/CXCL3/TNFAIP3/IL23A/PMEPA1/PTGER4/NFKBIA/TNFAIP8/PLEK/NFIL3/SERPINB2/ICAM1/CXCL1/CCL20/JUN/CSF1/BMP2/ZFP3…
HALLMARK_INTERFERON_GAMMA_RESPONSE	199	-0.631882	-2.87371	1e-10	2.77777777777778e-10	4.67836257309942e-11	9859	tags=66%, list=17%, signal=55%	PNP/IFI44L/IFIT3/APOL6/IFI35/SP110/KLRK1/MX1/LAP3/BATF2/OASL/RSAD2/RBCK1/UBE2L6/TAP1/SAMD9L/TXNIP/PSME1/PDE4B/ITGB7/PTPN2/PELI1/PSMA3/PFKP/SAMHD1/IFI44/BST2/ST8SIA4/PSMB2/NLRC5/CCL7/PTPN6/SSPN/SOD2/BTG1/IFITM2/IFI30/TRIM21/OGFR/GBP4/WARS1/TNFAIP6/GBP6/SECTM1/ARL4A/VAMP8/CD274/GPR18/ISG15/FGL2/IL7/BANK1/PTGS2/FPR1/B2M/SELP/MVP/IL15/CXCL10/CD38/IFI27/CMKLR1/MX2/LATS2/CXCL9/P2RY14/SLC25A28/CXCL11/SL…
HALLMARK_INFLAMMATORY_RESPONSE	199	-0.629003	-2.86061	1e-10	2.77777777777778e-10	4.67836257309942e-11	7466	tags=57%, list=13%, signal=49%	ADRM1/OPRK1/CYBB/PDE4B/KCNA3/CSF3/ICOSLG/SLC31A2/KLF6/AQP9/BST2/C5AR1/TLR2/CCL7/OSM/AHR/CXCL6/SELE/HBEGF/KCNJ2/IL1R1/TNFAIP6/IL10/SERPINE1/PTGER2/C3AR1/HRH1/TNFSF15/CCRL2/RGS1/PROK2/PTAFR/FPR1/HAS2/IL12B/NMUR1/SELL/IL15/CXCL10/APLNR/CMKLR1/CXCL9/IFNGR2/CXCL11/IRF7/TAPBP/STAB1/PTGER4/NFKBIA/IL18R1/NLRP3/AXL/IL18RAP/ADGRE1/RTP4/PIK3R5/IL4R/CXCR6/ICAM1/LAMP3/CCL20/CSF1/LY6E/GNA15/LYN/LCP2/CCL24/CD69…
HALLMARK_COAGULATION	138	-0.62877	-2.73875	1e-10	2.77777777777778e-10	4.67836257309942e-11	10719	tags=59%, list=19%, signal=48%	F2RL2/MBL2/MSRB2/FN1/DCT/ANG/MMP8/TFPI2/MMP10/GNB2/WDR1/OLR1/P2RY1/CAPN2/F3/F12/THBD/S100A13/FBN1/APOA1/ISCU/PEF1/SIRT2/CPQ/SERPINA1/GDA/SH2B2/PF4/MMP11/VWF/SERPINE1/CRIP2/RGN/MAFF/S100A1/C8G/CSRP1/DPP4/CTSH/CAPN5/CFD/ITIH1/MMP1/PROC/KLK8/TF/PLEK/LRP1/PROS1/SPARC/MMP9/CFH/A2M/SERPINB2/MMP15/LGMN/PECAM1/LEFTY2/CTSB/MMP3/HTRA1/PLAU/CTSK/TIMP1/COMP/MMP14/APOC1/MMP7/MMP2/CFI/C2/BMP1/FYN/C3/C1QA/ANXA1…
HALLMARK_IL6_JAK_STAT3_SIGNALING	87	-0.656328	-2.69202	1e-10	2.77777777777778e-10	4.67836257309942e-11	7271	tags=63%, list=13%, signal=55%	TNFRSF21/PTPN2/CRLF2/CD36/MAP3K8/TLR2/CCL7/CCR1/TNF/IFNGR1/IL9R/IL1R1/PF4/CSF2/IL7/CXCL13/CXCL10/CD38/CXCL9/IFNGR2/CXCL11/CXCL3/FAS/BAK1/IL18R1/CSF2RA/PIK3R5/IL4R/CNTFR/A2M/HMOX1/IL2RA/CXCL1/JUN/CSF1/IRF1/SOCS3/TNFRSF12A/IL1R2/CSF2RB/PLA2G2A/TNFRSF1A/IL6/EBI3/IL12RB1/PIM1/CD14/IL3RA/IL15RA/TNFRSF1B/SOCS1/IL2RG/TGFB1/LTB/ACVRL1
HALLMARK_MYOGENESIS	198	-0.575986	-2.61684	1e-10	2.77777777777778e-10	4.67836257309942e-11	9117	tags=53%, list=16%, signal=44%	TPD52L1/CNN3/TCAP/MYOZ1/MYOM2/CKMT2/EPHB3/FXYD1/MAPK12/ACHE/SGCG/DENND2B/CHRNA1/MYL1/TNNT2/PICK1/ACTN3/ACTC1/FKBP1B/ACTA1/SIRT2/SCHIP1/CD36/APOD/PRNP/SPEG/SSPN/FGF2/KLF5/MYOM1/MYH9/DMD/HBEGF/COL6A3/MYBPC3/ADAM12/ITGA7/COL3A1/MYH11/CKM/MYL3/AK1/MYLK/MYH4/SORBS3/CKB/MEF2C/RYR1/TNNC2/CFD/APLNR/EFS/AGRN/SLN/MYH7/MYH8/WWTR1/NCAM1/MYH2/COL15A1/MYL2/PTGIS/NOTCH1/HSPB2/MYH3/MYL6B/SPARC/MYH1/COL4A2/IGF1/M…
HALLMARK_KRAS_SIGNALING_UP	200	-0.563426	-2.56166	1e-10	2.77777777777778e-10	4.67836257309942e-11	8798	tags=57%, list=15%, signal=48%	AKAP12/EREG/ETV5/GPRC5B/F2RL1/RELN/ABCB1/LCP1/BIRC3/ITGBL1/NRP1/TNNT2/PPBP/MYCN/HDAC9/PCSK1N/MPZL2/APOD/ADAMDEC1/ADGRL4/TLR8/GADD45G/HOXD11/F13A1/PCP4/PIGR/TRIB2/KLF4/EPHB2/HBEGF/SPARCL1/MMP11/GLRX/ADAM8/DOCK2/ST6GAL1/C3AR1/HKDC1/CTSS/IL1RL2/CSF2/EMP1/PTGS2/SPRY2/FGF9/CXCL10/CMKLR1/TFPI/IL33/TNFAIP3/ANKH/ALDH1A2/RETN/GPNMB/SPON1/ADGRA2/IRF8/MAFB/CSF2RA/CXCR4/FLT4/CIDEA/MMP9/SNAP91/CFH/RBP4/ALDH1A…
HALLMARK_PROTEIN_SECRETION	96	0.652409393181788	2.49951649612658	1e-10	2.77777777777778e-10	4.67836257309942e-11	6714	tags=55%, list=12%, signal=49%	YIPF6/OCRL/ATP7A/ARFGEF2/CLCN3/MON2/TOM1L1/AP1G1/SCAMP1/DNM1L/COG2/ARFGEF1/GOLGA4/TMED2/VAMP4/COPB1/CLTC/M6PR/STAM/AP2B1/LMAN1/VAMP7/RAB22A/AP3B1/NAPG/GBF1/KIF1B/ARFIP1/LAMP2/VPS4B/COPB2/USO1/ATP1A1/RAB14/TSG101/SNAP23/DOP1A/ADAM10/MAPK1/TPD52/TMX1/STX16/SCRN1/GOSR2/ATP6V1H/TMED10/SNX2/SEC22B/SEC24D/ARCN1/GALC/BNIP3/RAB5A
HALLMARK_INTERFERON_ALPHA_RESPONSE	97	-0.595762	-2.47294	1e-10	2.77777777777778e-10	4.67836257309942e-11	10120	tags=61%, list=18%, signal=50%	IFI44L/IFIT3/IFI35/SP110/MX1/LAP3/BATF2/LPAR6/OASL/IFITM1/RSAD2/UBE2L6/UBA7/TAP1/SAMD9L/TXNIP/PSME1/NCOA7/PSMA3/IFI44/BST2/IFITM2/IFI30/TRIM21/CNP/OGFR/GBP4/WARS1/ISG15/CCRL2/IL7/B2M/SELL/IL15/CXCL10/IFI27/SLC25A28/CXCL11/IRF7/EPSTI1/RTP4/PROCR/IL4R/GBP2/MVB12A/LAMP3/CSF1/LY6E/ISG20/PSME2/IRF1/NMI/HLA-C/IFITM3/PSMB8/PSMB9/CASP1/CD74/C1S
HALLMARK_IL2_STAT5_SIGNALING	198	-0.543046	-2.46719	1e-10	2.77777777777778e-10	4.67836257309942e-11	5748	tags=44%, list=10%, signal=40%	IFNGR1/AHR/NCS1/EEF1AKMT1/GPX4/RRAGD/SHE/FLT3LG/GBP4/GALM/IL10/PTGER2/ARL4A/SYT11/CD83/MAFF/PLPP1/FGL2/TGM2/PUS1/LRRC8C/CSF2/EMP1/ITGAE/S100A1/ANXA4/GPR65/SELL/SELP/RNH1/PRAF2/CXCL10/PLIN2/HOPX/CD81/NT5E/IL18R1/IRF8/TNFSF11/CD86/NFIL3/ICOS/CCR4/IL4R/EOMES/CDKN1C/IRF4/IL2RA/CSF1/ITIH5/BMP2/ADAM19/PENK/SLC2A3/AGER/IL2RB/DHRS3/LIF/TRAF1/IL10RA/TNFRSF9/BATF/CTLA4/PLAGL1/RGS16/CAPG/CCND3/IL1R2/IFITM3/…
HALLMARK_COMPLEMENT	200	-0.540142	-2.4558	1e-10	2.77777777777778e-10	4.67836257309942e-11	7502	tags=50%, list=13%, signal=43%	ATOX1/CP/APOBEC3F/S100A13/CPM/ZFPM2/FDX1/MSRB1/CPQ/CD36/PRSS3/MMP13/SERPINA1/NOTCH4/PLA2G7/MMP12/CASP5/CTSL/ITGAM/PIK3CG/SERPINE1/CR1/MAFF/CR2/KCNIP2/CTSS/CASP10/CSRP1/DGKG/ANXA5/L3MBTL4/DPP4/S100A12/CTSH/ITIH1/IRF7/TNFAIP3/LTF/STX4/PLEK/LRP1/PIK3R5/PLA2G4A/ADRA2B/CFH/SERPINB2/MMP15/CXCL1/CTSC/COL4A2/LGMN/LYN/LCP2/IRF1/TIMP2/CTSB/S100A9/APOBEC3G/CDA/GZMB/TIMP1/GNG2/IL6/PCSK9/C1QC/GZMK/FCN1/PSMB9/…
HALLMARK_HYPOXIA	199	-0.511961	-2.32833	1e-10	2.77777777777778e-10	4.67836257309942e-11	8951	tags=49%, list=16%, signal=41%	DDIT3/GPI/AKAP12/XPNPEP1/LXN/GALK1/GCNT2/PCK1/F3/EFNA1/TES/NDRG1/TMEM45A/CP/PFKP/DUSP1/KLF6/DPYSL4/GRHPR/IGFBP1/MT1E/GPC1/HOXB9/BTG1/PAM/PRKCA/MYH9/RRAGD/TKTL1/PFKL/GCK/GLRX/FAM162A/HEXA/SERPINE1/PPARGC1A/FOS/EXT1/MAFF/TPST2/TGM2/DDIT4/SDC2/KDELR3/PLIN2/TNFAIP3/HS3ST1/LOX/PHKG1/CXCR4/NFIL3/EGFR/CDKN1C/HMOX1/COL5A1/MT2A/JUN/SLC2A5/EFNA3/ANXA2/ZFP36/DCN/SLC2A3/ISG20/CHST3/PKP1/CAV1/ATF3/ETS1/TGFBI/…
HALLMARK_G2M_CHECKPOINT	200	0.54195483111524	2.27988583799717	1e-10	2.77777777777778e-10	4.67836257309942e-11	9329	tags=48%, list=16%, signal=40%	ATRX/CCNT1/GSPT1/SMC1A/CUL3/LIG3/NUP98/KIF5B/ORC5/WRN/CTCF/XPO1/TOP1/SMC2/SLC38A1/BUB3/KPNB1/POLE/PRPF4B/ARID4A/SLC12A2/NSD2/CCND1/CUL5/YTHDC1/HUS1/H2AZ2/CDC27/HSPA8/SRSF10/KIF20B/CUL1/PURA/SMARCC1/TNPO2/RAD23B/SRSF1/SMC4/RBL1/STAG1/MNAT1/KIF4A/CENPE/RACGAP1/TOP2A/PRMT5/RPS6KA5/PAFAH1B1/CASP8AP2/TLE3/GINS2/TMPO/KNL1/NOLC1/SS18/MCM2/POLQ/DKC1/SMAD3/G3BP1/CDC6/MAD2L1/NUMA1/KMT5A/MAPK14/PLK4/HNRNPU/…
HALLMARK_APICAL_JUNCTION	198	-0.49204	-2.23546	1e-10	2.77777777777778e-10	4.67836257309942e-11	7221	tags=43%, list=13%, signal=38%	FBN1/CLDN19/ACTN3/ACTC1/ACTA1/ADAM15/MPZL2/ALOX15B/CDH15/CDH4/NRTN/SPEG/COL17A1/TNFRSF11B/CDH11/YWHAH/MYH9/FYB1/SYK/PTPRC/CAP1/VWF/SLC30A3/CD274/LAMB3/CDH3/SORBS3/CD209/ADAMTS5/MSN/MVD/DSC3/GNAI1/VCAM1/HRAS/ADRA1B/STX4/CERCAM/MYL12B/CD34/CD86/NRXN2/ADAM23/FLNC/EGFR/MMP9/ICAM1/AKT3/CALB2/THBS3/NECTIN3/ICAM5/CLDN15/ACTN1/PECAM1/CLDN11/NEXN/RSU1/TRAF1/TGFBI/CADM3/LAYN/SIRPA/CLDN14/CX3CL1/ACTG2/MAPK1…
HALLMARK_MITOTIC_SPINDLE	199	0.528096473038379	2.21828936471667	1e-10	2.77777777777778e-10	4.67836257309942e-11	10633	tags=54%, list=19%, signal=44%	KIF3B/WASL/CLIP1/CKAP5/SMC1A/ALS2/OPHN1/STAU1/RFC1/APC/NF1/RICTOR/KIF5B/KNTC1/ARFGEF1/LRPPRC/EPB41/ALMS1/ARHGAP5/ARHGEF11/RABGAP1/TUBGCP5/RANBP9/RASA1/ARHGEF12/SHROOM2/KIF1B/DYNC1H1/BCL2L11/CD2AP/DYNLL2/ROCK1/HDAC6/MAPRE1/FGD6/TRIO/CDC27/SASS6/CEP192/SMC3/KIF20B/LATS1/CLASP1/SOS1/DLG1/RAPGEF5/KIFAP3/TLK1/MYH10/SMC4/SSH2/ECT2/KIF4A/CENPE/RACGAP1/PPP4R2/TOP2A/FLNB/RAB3GAP1/PAFAH1B1/PCM1/NET1/TAOK2/…
HALLMARK_E2F_TARGETS	200	0.523451798815172	2.20204761444242	1e-10	2.77777777777778e-10	4.67836257309942e-11	10670	tags=46%, list=19%, signal=37%	PMS2/RAD50/GSPT1/SMC1A/IPO7/NUP205/RFC1/CCP110/BRCA1/RAD1/PAN2/CBX5/ORC2/CTCF/XPO1/TIMELESS/NUP153/CSE1L/POLE/WEE1/RBBP7/HUS1/PRKDC/SMC3/PAICS/SRSF1/SMC4/MLH1/PPM1D/RAD51C/STAG1/NUP107/KIF4A/CENPE/RACGAP1/NUDT21/DCK/TOP2A/NBN/UBR7/UNG/TMPO/CIT/MRE11/NOLC1/MCM2/PSMC3IP/BUB1B/MMS22L/HELLS/DNMT1/ATAD2/MAD2L1/USP1/MSH2/SPAG5/PLK4/GINS1/TUBG1/SHMT1/BRCA2/DCTPP1/SMC6/ESPL1/WDR90/PRPS1/TIPIN/HMMR/GINS4/…
HALLMARK_ESTROGEN_RESPONSE_EARLY	200	0.488746577975464	2.05605031549004	4.00746355547004e-10	1.05459567249211e-09	1.7761611326183e-10	9114	tags=45%, list=16%, signal=38%	MED13L/DYNLT3/SLC22A5/RETREG1/SLC19A2/SLC39A6/ABHD2/THSD4/CANT1/MINDY1/RBBP8/AKAP1/NRIP1/FKBP4/ESRP2/CCND1/RHOBTB3/MYOF/AFF1/SLC27A2/ABCA3/BCL2/AMFR/IGF1R/FRK/MAST4/TOB1/SYBU/CA12/SLC9A3R1/ELOVL5/FLNB/ADCY9/AR/IL6ST/UGCG/XBP1/FAM102A/CELSR1/INPP5F/SNX24/MAPT/GREB1/PMAIP1/CELSR2/MYB/SLC7A2/HSPB8/WFS1/ELF1/FASN/TBC1D30/ANXA9/ISG20L2/ABAT/NCOR2/MED24/SIAH2/ADCY1/TMEM164/LRIG1/MREG/MLPH/RET/TPBG/IL17…
HALLMARK_P53_PATHWAY	199	-0.458149	-2.08359	4.22281312831322e-10	1.05570328207831e-09	1.77802658034241e-10	8376	tags=45%, list=15%, signal=38%	IP6K2/TP63/TAP1/EPHX1/INHBB/TXNIP/TPRKB/RNF19B/NINJ1/NDRG1/NUDT15/ISCU/TAX1BP3/ALOX15B/EPS8L2/PTPN14/IER5/TM4SF1/BTG1/IFI30/KLF4/GM2A/HBEGF/CDKN2B/STEAP3/NUPR1/FAM162A/VAMP8/FOS/GADD45A/CLCA2/CDKN2A/SERPINB5/SFN/ZFP36L1/LDHB/DDIT4/AK1/CEBPA/IRAG2/PDGFA/CD81/FAS/ST14/HRAS/DGKA/BAK1/KLK8/NOTCH1/PROCR/HMOX1/TCN2/RALGDS/MXD4/JUN/BMP2/SAT1/PHLDA3/PRMT2/JAG2/LIF/DEF6/ATF3/SDC1/RGS16/S100A10/RAP2B/CCND3…
HALLMARK_KRAS_SIGNALING_DN	200	-0.416714	-1.89462	9.45358945804534e-08	2.25085463286794e-07	3.79091306588284e-08	10120	tags=41%, list=18%, signal=34%	IFI44L/SCGB1A1/NRIP2/SLC38A3/SLC16A7/IDUA/COQ8A/CALCB/MX1/CLDN8/RSAD2/PAX3/ARPP21/SLC6A3/DCC/LGALS7/FGF22/GDNF/ACTC1/SNCB/GPR3/SLC6A14/ATP4A/SLC12A3/TFF2/ABCG4/TG/TGFB2/WNT16/KLHDC8A/VPREB1/TFAP2B/CYP39A1/PLAG1/KRT15/SMPX/SLC30A3/CPA2/ITGB1BP2/CKM/KCND1/EDAR/KRT1/SGK1/IL12B/NTF3/DLK2/RYR1/FGF16/KCNN1/MYH7/KLK8/CCNA1/CD207/KLK7/IFNG/NUDT11/SHOX2/CLDN16/TCL1A/MACROH2A2/CNTFR/SERPINB2/SOX10/ITIH3/PK…
HALLMARK_APOPTOSIS	161	-0.446494	-1.97261	1.05327440738464e-07	2.39380547132874e-07	4.03167237276419e-08	6449	tags=36%, list=11%, signal=32%	PEA15/PPP3R1/TNF/SOD2/IFNGR1/TGFB2/GPX4/NEDD9/MGMT/NEFH/GADD45A/BTG3/PDGFRB/EMP1/CD38/FASLG/FAS/ANKH/CCNA1/BID/HMOX1/LUM/JUN/BMP2/GNA15/SAT1/CD69/DCN/ISG20/CAV1/ATF3/IRF1/TIMP2/PLCB2/TNFRSF12A/PRF1/IFITM3/TIMP1/IL6/CASP1/GPX1/GPX3/CASP4/CD14/BAX/IL18/CD2/MMP2/TSPO/CCND2/LGALS3/FEZ1/LMNA/IGFBP6/GADD45B/ANXA1/GSN/BGN
HALLMARK_XENOBIOTIC_METABOLISM	199	-0.381859	-1.73664	9.49547765660366e-06	2.06423427317471e-05	3.47660509166267e-06	8629	tags=38%, list=15%, signal=32%	GABARAPL1/COMT/DHPS/GCNT2/EPHX1/SLC1A5/NINJ1/TPST1/PGD/AP4B1/CYP27A1/UPB1/AOX1/PTS/AKR1C3/IGFBP4/SLC22A1/AQP9/CD36/PEMT/DHRS1/IGFBP1/CRP/TGFB2/ALDH3A1/CYP2S1/SHMT2/IL1R1/CYP26A1/SMOX/SERPINE1/ACP2/ADH1C/BCAT1/CBR1/ETS2/SLC12A4/AKR1C2/ITIH1/FAS/IRF8/PROS1/CES1/GCKR/ABCD2/RBP4/NDRG2/HMOX1/MT2A/SERTAD1/FMO1/IGF1/CCL25/CDO1/PPARD/FMO3/DDAH2/VNN1/HSD17B2/ECH1/CDA/FBLN1/EPHA2/TNFRSF1A/LCAT/UPP1/ALDH2/P…
HALLMARK_HEME_METABOLISM	199	0.411422023437847	1.72819389183094	1.35992376951891e-05	2.83317451983106e-05	4.77166234918915e-06	7780	tags=35%, list=14%, signal=30%	CLCN3/NNT/VEZF1/GAPVD1/EPB41/EIF2AK1/FOXJ2/ADIPOR1/RNF123/MINPP1/TOP1/OSBP2/FECH/ATG4A/SYNJ1/BTRC/KHNYN/ARHGEF12/NUDT4/SLC11A2/MKRN1/MOSPD1/NCOA4/ALDH6A1/LAMP2/CDC27/ATP6V0A1/DCUN1D1/RANBP10/GDE1/GCLM/MOCOS/FBXO9/NEK7/SLC30A1/XPO7/LPIN2/GCLC/SLC22A4/ISCA1/CPOX/DAAM1/MBOAT2/HEBP1/XK/GMPS/ASNS/TSPO2/TMEM9B/MARCHF8/SLC7A11/USP15/KLF3/SLC25A38/KAT2B/ADD1/NFE2L1/TRAK2/EZH1/BMP2K/TFDP2/SLC6A8/DCAF11/HA…
HALLMARK_UV_RESPONSE_UP	158	-0.394811	-1.73729	1.72993955703368e-05	3.45987911406735e-05	5.82716482369239e-06	6519	tags=33%, list=11%, signal=29%	POLR2H/FOSB/AQP3/SOD2/BTG1/CNP/CDKN2B/ACAA1/FOS/PDAP1/BTG3/NPTX2/H2AX/TST/PDLIM3/MRPL23/NFKBIA/BAK1/SELENOW/SHOX2/BID/PSMC3/ICAM1/CDKN1C/HMOX1/STK25/MSX1/GAL/FMO1/CDC34/APOM/BMP2/UROD/LYN/FGF18/CDO1/ATF3/IRF1/AP2S1/CXCL2/CCND3/JUNB/IL6/KLHDC3/HYAL2/MMP14/RRAD/GPX3/ARRB2/CLTB/HLA-F/MGAT1
HALLMARK_MYC_TARGETS_V1	199	0.39026699578433	1.63933139179551	0.000124508721901131	0.000239439849809868	4.03267115469251e-05	8191	tags=34%, list=14%, signal=29%	CSTF2/GSPT1/FAM120A/TOMM70/VBP1/IARS1/RRM1/CANX/DHX15/GOT2/ORC2/XPO1/NCBP1/BUB3/EIF4E/KPNB1/PRPS2/ETF1/EIF1AX/XPOT/EIF4G2/DDX21/HPRT1/CUL1/SMARCC1/HNRNPR/RAD23B/SRSF1/CCT2/HSPD1/PRDX3/HSP90AB1/ABCE1/PGK1/DDX18/PTGES3/UBA2/PWP1/CBX3/NOLC1/MCM2/CCT5/EPRS1/PSMD1/G3BP1/EIF3J/SF3A1/SNRPD3/MAD2L1/USP1/SF3B3/UBE2E1/HNRNPU/SRPK1/PSMD7/CDK2/STARD7/GLO1/EIF4H/PSMA2/VDAC1/YWHAQ/PSMC6/RSL1D1/EIF2S1/ACP1/MCM6
HALLMARK_ANGIOGENESIS	36	-0.578989	-1.99042	0.000177275171821003	0.000322315630425645	5.42847377558981e-05	9617	tags=61%, list=17%, signal=51%	APP/POSTN/OLR1/NRP1/THBD/TNFRSF21/SLCO2A1/PRG2/CXCL6/COL5A2/PF4/COL3A1/LPL/PDGFA/KCNJ8/LUM/MSX1/JAG2/FSTL1/TIMP1/CCND2/S100A4
HALLMARK_MTORC1_SIGNALING	200	0.380692477776582	1.60149026982348	0.000180496753038361	0.000322315630425645	5.42847377558981e-05	9387	tags=35%, list=17%, signal=29%	ACACA/ATP2A2/NUP205/HSPA9/HMGCR/GSK3B/CYP51A1/TBK1/CANX/ACLY/SORD/PSME3/SYTL2/M6PR/ELOVL6/ADIPOR2/ETF1/STC1/DHFR/USO1/PSMD12/HPRT1/HMGCS1/HSPA4/GGA2/ACSL3/HK2/INSIG1/TMEM97/HSPD1/TXNRD1/EDEM1/SLC9A3R1/ELOVL5/DHCR24/UNG/XBP1/PGK1/MCM2/UBE2D3/GCLC/EPRS1/UCHL5/GMPS/ASNS/LDLR/SLC7A11/NMT1/TUBG1/SCD/CCNF/IDI1/GSR/PNO1/GTF2H1/PSMC2/SLC1A4/CYB5B/ME1/CCT6A/PSMC6/IMMT/CCNG1/BHLHE40/SC5D/SERP1/CACYBP/TCEA1…
HALLMARK_ESTROGEN_RESPONSE_LATE	200	0.368862016375027	1.5517220975371	0.000558355736891618	0.000962682304985548	0.000162135967155461	8644	tags=36%, list=15%, signal=31%	DYNLT3/SLC22A5/HOMER2/DLG5/PRLR/CDH1/SORD/RABEP1/ABHD2/RBBP8/NRIP1/TSPAN13/FKBP4/HSPA4L/CCND1/MYOF/PRKAR2B/AFF1/SLC27A2/ABCA3/HPRT1/CACNA2D2/BCL2/AMFR/FRK/TOB1/CA12/TOP2A/SLC9A3R1/ELOVL5/FLNB/IL6ST/UNC13B/DNAJC12/XBP1/GINS2/ALDH3A2/SERPINA5/FAM102A/MAPK13/MAPT/AGR2/CDC6/CELSR2/MYB/HSPB8/WFS1/PLK4/ANXA9/NCOR2/METTL3/SLC29A1/SIAH2/UGDH/RET/TPBG/IL17RB/STIL/ARL3/PLAC1/SCNN1A/CHPT1/SLC1A4/ST6GALNAC2/…
HALLMARK_UNFOLDED_PROTEIN_RESPONSE	112	0.411273396861331	1.60632075985558	0.00276258135153543	0.00460430225255905	0.000775461432009945	8735	tags=38%, list=15%, signal=33%	HSPA9/CNOT4/KIF5B/ATF6/IARS1/SLC30A5/MTREX/PAIP1/EIF2AK3/EIF4E/EDC4/PARN/XPOT/DCP1A/DNAJA4/CNOT6/NOP14/EDEM1/ERN1/EXOC2/XBP1/CNOT2/NOLC1/DKC1/GOSR2/ASNS/WFS1/SDAD1/DCTN1/DNAJB9/DNAJC3/CEBPG/DCP2/NFYB/EIF4A2/SLC1A4/TARS1/ALDH18A1/NFYA/EIF2S1/EIF4G1/SERP1/EXOSC9
HALLMARK_ANDROGEN_RESPONSE	100	0.41606315560539	1.60608350472547	0.00310963254774285	0.00501553636732718	0.00084472191449721	7639	tags=37%, list=13%, signal=32%	APPBP2/HMGCR/HOMER2/MAP7/PIAS1/SORD/ABHD2/LMAN1/NCOA4/CCND1/STK39/SLC38A2/CAMKK2/HMGCS1/ACSL3/TPD52/LIFR/INSIG1/ZBTB10/ZMIZ1/ELOVL5/DHCR24/GPD1L/ELK4/INPP4B/SELENOP/SRP19/SCD/DNAJB9/IDI1/IQGAP2/GSR/SEC24D/BMPR1B/UAP1/CENPN/ELL2
HALLMARK_WNT_BETA_CATENIN_SIGNALING	42	-0.489144	-1.73839	0.0041697023506225	0.0064221561373224	0.00108162629681219	4863	tags=36%, list=9%, signal=33%	NOTCH4/FZD1/DKK1/DLL1/HEY2/GNAI1/NOTCH1/TCF7/PPARD/JAG2/FZD8/WNT1/WNT5B/CCND2/WNT6
HALLMARK_REACTIVE_OXYGEN_SPECIES_PATHWAY	49	-0.454999	-1.66515	0.00423862305063279	0.0064221561373224	0.00108162629681219	10460	tags=53%, list=18%, signal=43%	SELENOS/HHEX/ERCC2/NDUFB4/SBNO2/ATOX1/LAMTOR5/PTPA/PFKP/NDUFA6/CDKN2D/PRNP/SOD2/GPX4/GLRX/MPO/PDLIM1/TXN/IPCEF1/STK25/MSRA/JUNB/GPX3/FES/FTL/LSP1
HALLMARK_CHOLESTEROL_HOMEOSTASIS	74	-0.392124	-1.56363	0.00812084538316661	0.0119424196811274	0.00201135489366356	5497	tags=34%, list=10%, signal=31%	PMVK/ETHE1/ADH4/PCYT2/ANTXR2/ANXA5/LPL/PPARG/GPX8/MVD/GNAI1/CXCL16/NFIL3/STX5/LGMN/ATF5/ATF3/PNRC1/TNFRSF12A/ECH1/S100A11/PLAUR/FABP5/LGALS3/ANXA13
HALLMARK_APICAL_SURFACE	44	-0.448613	-1.60892	0.010589768872827	0.0151282412468957	0.00254791431526665	3103	tags=36%, list=5%, signal=34%	EFNA5/SLC2A4/RHCG/PKHD1/CROCC/LYN/IL2RB/CX3CL1/PCSK9/GHRL/SRPX/PLAUR/GAS1/THY1/IL2RG/MAL
HALLMARK_NOTCH_SIGNALING	32	-0.487836	-1.63767	0.0128571884148823	0.017857206131781	0.00300752945377364	7778	tags=56%, list=14%, signal=49%	NOTCH3/HEYL/WNT5A/DTX4/FZD7/PRKCA/FZD1/ST3GAL6/PSENEN/DLL1/MAML2/RBX1/NOTCH1/TCF7L2/DTX1/DTX2/PPARD/WNT2
HALLMARK_BILE_ACID_METABOLISM	112	0.375381683389786	1.46613759970926	0.0162815046626492	0.0220020333279044	0.00370560561312074	9209	tags=35%, list=16%, signal=29%	PEX1/LONP2/PNPLA8/NUDT12/PEX19/ABCD3/SLC23A2/SLC27A2/ABCA3/GCLM/PEX12/ABCA5/PECR/PFKM/AR/DHCR24/NEDD4/EFHC1/PEX13/PEX7/AMACR/PHYH/CROT/ALDH9A1/NPC1/SLC29A1/SCP2/IDI1/PXMP2/HSD17B4/GNPAT/ABCA2/PEX11A/PEX26/SLC23A1/ISOC1/MLYCD/SULT2B1/RETSAT
HALLMARK_DNA_REPAIR	149	0.335935893851043	1.36468976998249	0.0216930234054103	0.0284435420409008	0.00479049129109909	7157	tags=27%, list=13%, signal=24%	POLA1/ERCC4/POM121/GTF2H3/SMAD5/PRIM1/TMED2/ADCY6/RRM2B/DCTN4/ERCC3/CANT1/STX3/XPC/RFC5/RNMT/TSG101/HPRT1/RAD52/ARL6IP1/ERCC8/DDB1/CETN2/NUDT21/AGO4/POLR2D/MPC2/RAE1/REV3L/CSTF3/POLR2A/SRSF6/BRF2/NFX1/ELOA/GTF2H1/NELFCD/ERCC5/TAF6/POLD3
HALLMARK_UV_RESPONSE_DN	144	0.344797311305266	1.39642801799894	0.0221859627919026	0.0284435420409008	0.00479049129109909	8421	tags=35%, list=15%, signal=30%	ATRX/ATRN/NIPBL/CDK13/TOGARAM1/ATP2C1/ABCC1/MIOS/CDON/ATP2B1/AGGF1/YTHDC1/PHF3/PRKAR2B/APBB2/IRS1/DLG1/BMPR1A/IGF1R/SYNJ2/INSIG1/PIAS3/SCAF8/NEK7/ZMIZ1/SPOP/NR1D2/ERBB2/CDC42BPA/SMAD3/MAGI2/PRKCE/SFMBT1/DYRK1A/INPP4B/MAPK14/LDLR/TJP1/BCKDHB/MAP2K5/NOTCH2/WDR37/ARHGEF9/TENT4A/ICA1/DMAC2L/PRDM2/BHLHE40/DDAH1/SIPA1L1
HALLMARK_HEDGEHOG_SIGNALING	36	-0.425124	-1.46147	0.0349346741871549	0.0436683427339436	0.00735466824992734	7579	tags=47%, list=13%, signal=41%	ACHE/NRP1/NKX6-1/L1CAM/RTN1/SCG2/MYH9/ETS2/HEY2/TLE1/DPYSL2/CNTFR/GLI1/CDK6/NRP2/THY1/PML
HALLMARK_ADIPOGENESIS	200	0.306734214492457	1.29036397777186	0.0401106500691563	0.0489154269136052	0.00823838769071246	6348	tags=27%, list=11%, signal=24%	MAP4K3/CHUK/BAZ2A/UBQLN1/IDH3A/LPCAT3/GPD2/YWHAG/PPP1R15B/CMBL/ADCY6/ACLY/G3BP2/DLD/CS/ELOVL6/ADIPOR2/DBT/AIFM1/NDUFA5/ACOX1/GHITM/LIFR/CPT2/TOB1/PRDX3/PTCD3/REEP5/BCL2L13/NKIRAS1/ACADM/COQ5/ACO2/GPAM/PHYH/AGPAT3/HSPB8/GPHN/RREB1/SDHC/MTCH2/DLAT/NMT1/CCNG2/GPAT4/DNAJB9/SCP2/SOWAHC/ATL2/APLP2/ESYT1/ARAF/HADH/CD302
HALLMARK_PEROXISOME	104	0.351811324604645	1.36324183015262	0.0483383685800604	0.0575456768810243	0.00969190347469883	9610	tags=35%, list=17%, signal=29%	IDE/LONP2/ERCC3/ABCD3/VPS4B/SLC23A2/SLC27A2/SMARCC1/ACOX1/PEX5/TOP2A/SEMA3C/ABCC5/ELOVL5/SLC25A17/DHCR24/SLC25A4/CDK7/PEX13/ABCC8/ALDH9A1/MSH2/SCP2/ABCB9/IDI1/HSD17B4/PEX2/GNPAT/PEX11A/EHHADH/PEX11B/ISOC1/MLYCD/SULT2B1/RETSAT/CLN6
